# Supplementary material
Source: Research Square preprint supplement (doi:10.21203/rs.3.rs-9611958/v1)
Supplement: Supplementary file 1 [file c9747fc550179333934d624a.xlsx]

## Sheet: Metaannotation
Supplementary Data Legends
S1.	Metadata for all porcine subjects included in the discovery and validation cohorts. This includes animal ID, infection status (PRCV, pH1N1), and specific sampling time points (Pre-infection, 1, 5, 12 days-post infection (DPI) for discovery and (Pre-infection (1,3,5,and 7 days-post infection (DPI) for validation).
S2.	Detailed list of Multiple Reaction Monitoring (MRM) transitions for endogenous peptides and their corresponding stable isotope-labelled (heavy) internal standards of candidate proteins used for validation. Data includes Protein gene symbol, Peptide sequence, precursor/product ion m/z, fragment ion, observed chromatographic retention times (RT) and optimised collision energies (CE).
S3	Spectronaut output file containing normalised summed protein group intensities for protein groups and GO ontology across all swine serum samples
S3A.	Paired limma analysis comparing 1, 5, and 12 DPI to pre-infection serum proteomes in PRCV and pH1N1 infected pigs
S3B.	Paired limma analysis comparing pre-infection samples and PRCV and pH1N1 post-infection serum samples
S3C.	Serum proteins significantly altered following PRCV infection in swine
S3D.	Serum proteins significantly altered following pH1N1 infection in swine
S3E.	Shared differentially abundant serum proteins following PRCV and pH1N1 infection
S3F.	PRCV-specific differentially abundant serum proteins
S3G.	pH1N1-specific differentially abundant serum proteins
S4A.	PRCV protein association with clinical scores (viral load, Halbur and Iowa scores) classification
S4B.	pH1N1 protein association with clinical scores (viral load, Halbur and Iowa scores) classification
S5.	Limits of detection and quantification and CV of the heavy-labeled peptides
S6.	Multiple Reaction Monitoring analysis for the candidate markers-CRP, LTF, SRGN,SOD1, PPIA, PRDX2 and RAN peptides in Pre-Infection-, PRCV and pH1N1 (1, 3, 5, 7 DPI)

## Sheet: S1
S1. Metadata for all porcine subjects included in the discovery and validation cohorts. This includes animal ID, infection status (PRCV, pH1N1), and specific sampling time points (Pre-infection, 1, 5, 12 days-post infection (DPI) for discovery and (Pre-infection (1,3,5,and 7 days-post infection (DPI) for validation).
Sample ID	Study	Pig ID	Type of infection	Day of collection
SF-1	Discovery	11	PRCV	Pre-infection
SF-2	Discovery	12	PRCV	Pre-infection
SF-3	Discovery	13	PRCV	Pre-infection
SF-4	Discovery	20	PRCV	Pre-infection
SF-5	Discovery	21	PRCV	Pre-infection
SF-11	Discovery	23	pH1N1	Pre-infection
SF-12	Discovery	27	pH1N1	Pre-infection
SF-13	Discovery	31	pH1N1	Pre-infection
SF-14	Discovery	34	pH1N1	Pre-infection
SF-15	Discovery	36	pH1N1	Pre-infection
SF-6	Discovery	11	PRCV	1 DPI
SF-7	Discovery	12	PRCV	1 DPI
SF-8	Discovery	13	PRCV	1 DPI
SF-9	Discovery	20	PRCV	1 DPI
SF-10	Discovery	21	PRCV	1 DPI
SF-16	Discovery	23	pH1N1	1 DPI
SF-17	Discovery	27	pH1N1	1 DPI
SF-18	Discovery	31	pH1N1	1 DPI
SF-19	Discovery	34	pH1N1	1 DPI
SF-20	Discovery	36	pH1N1	1 DPI
SF-29	Discovery	15	PRCV	Pre-infection
SF-30	Discovery	16	PRCV	Pre-infection
SF-31	Discovery	17	PRCV	Pre-infection
SF-32	Discovery	18	PRCV	Pre-infection
SF-33	Discovery	19	PRCV	Pre-infection
SF-34	Discovery	15	PRCV	5 DPI
SF-35	Discovery	16	PRCV	5 DPI
SF-36	Discovery	17	PRCV	5 DPI
SF-37	Discovery	18	PRCV	5 DPI
SF-38	Discovery	19	PRCV	5 DPI
SF-39	Discovery	22	pH1N1	Pre-infection
SF-40	Discovery	24	pH1N1	Pre-infection
SF-41	Discovery	25	pH1N1	Pre-infection
SF-42	Discovery	26	pH1N1	Pre-infection
SF-43	Discovery	28	pH1N1	Pre-infection
SF-44	Discovery	22	pH1N1	5 DPI
SF-45	Discovery	24	pH1N1	5 DPI
SF-46	Discovery	25	pH1N1	5 DPI
SF-47	Discovery	26	pH1N1	5 DPI
SF-48	Discovery	28	pH1N1	5 DPI
SF-49	Discovery	7	PRCV	Pre-infection
SF-50	Discovery	8	PRCV	Pre-infection
SF-51	Discovery	9	PRCV	Pre-infection
SF-52	Discovery	10	PRCV	Pre-infection
SF-53	Discovery	14	PRCV	Pre-infection
SF-54	Discovery	7	PRCV	12 DPI
SF-55	Discovery	8	PRCV	12 DPI
SF-56	Discovery	9	PRCV	12 DPI
SF-57	Discovery	10	PRCV	12 DPI
SF-58	Discovery	14	PRCV	12 DPI
SF-59	Discovery	29	pH1N1	Pre-infection
SF-60	Discovery	30	pH1N1	Pre-infection
SF-61	Discovery	32	pH1N1	Pre-infection
SF-62	Discovery	33	pH1N1	Pre-infection
SF-63	Discovery	35	pH1N1	Pre-infection
SF-64	Discovery	29	pH1N1	12 DPI
SF-65	Discovery	30	pH1N1	12 DPI
SF-66	Discovery	32	pH1N1	12 DPI
SF-67	Discovery	33	pH1N1	12 DPI
SF-68	Discovery	35	pH1N1	12 DPI
SFV-1	Validation	33	pH1N1	Pre-infection
SFV-2	Validation	33	pH1N1	1 DPI
SFV-3	Validation	33	pH1N1	3 DPI
SFV-4	Validation	33	pH1N1	5 DPI
SFV-5	Validation	33	pH1N1	7 DPI
SFV-6	Validation	71	pH1N1	Pre-infection
SFV-7	Validation	71	pH1N1	1 DPI
SFV-8	Validation	71	pH1N1	3 DPI
SFV-9	Validation	71	pH1N1	5 DPI
SFV-10	Validation	71	pH1N1	7 DPI
SFV-11	Validation	115	pH1N1	Pre-infection
SFV-12	Validation	115	pH1N1	1 DPI
SFV-13	Validation	115	pH1N1	3 DPI
SFV-14	Validation	115	pH1N1	5 DPI
SFV-15	Validation	115	pH1N1	7 DPI
SFV-16	Validation	163	pH1N1	Pre-infection
SFV-17	Validation	163	pH1N1	1 DPI
SFV-18	Validation	163	pH1N1	3 DPI
SFV-19	Validation	163	pH1N1	5 DPI
SFV-20	Validation	163	pH1N1	7 DPI
SFV-21	Validation	150	pH1N1	Pre-infection
SFV-22	Validation	150	pH1N1	1 DPI
SFV-23	Validation	150	pH1N1	3 DPI
SFV-24	Validation	150	pH1N1	5 DPI
SFV-25	Validation	150	pH1N1	7 DPI
SFV-26	Validation	144	pH1N1	Pre-infection
SFV-27	Validation	144	pH1N1	1 DPI
SFV-28	Validation	144	pH1N1	3 DPI
SFV-29	Validation	144	pH1N1	5 DPI
SFV-30	Validation	144	pH1N1	D8
SFV-31	Validation	13	pH1N1	Pre-infection
SFV-32	Validation	13	pH1N1	1 DPI
SFV-33	Validation	13	pH1N1	3 DPI
SFV-34	Validation	13	pH1N1	5 DPI
SFV-35	Validation	13	pH1N1	7 DPI
SFV-36	Validation	154	pH1N1	Pre-infection
SFV-37	Validation	154	pH1N1	1 DPI
SFV-38	Validation	154	pH1N1	3 DPI
SFV-39	Validation	154	pH1N1	5 DPI
SFV-40	Validation	154	pH1N1	7 DPI
SFV-41	Validation	9555	PRCV	Pre-infection
SFV-42	Validation	9555	PRCV	1 DPI
SFV-43	Validation	9555	PRCV	3 DPI
SFV-44	Validation	9555	PRCV	5 DPI
SFV-45	Validation	9555	PRCV	7 DPI
SFV-46	Validation	9656	PRCV	Pre-infection
SFV-47	Validation	9656	PRCV	1 DPI
SFV-48	Validation	9656	PRCV	3 DPI
SFV-49	Validation	9656	PRCV	5 DPI
SFV-50	Validation	9656	PRCV	7 DPI
SFV-51	Validation	9558	PRCV	Pre-infection
SFV-52	Validation	9558	PRCV	1 DPI
SFV-53	Validation	9558	PRCV	3 DPI
SFV-54	Validation	9558	PRCV	5 DPI
SFV-55	Validation	9558	PRCV	7 DPI
SFV-56	Validation	9673	PRCV	Pre-infection
SFV-57	Validation	9673	PRCV	1 DPI
SFV-58	Validation	9673	PRCV	3 DPI
SFV-59	Validation	9673	PRCV	5 DPI
SFV-60	Validation	9673	PRCV	7 DPI
SFV-61	Validation	9658	PRCV	Pre-infection
SFV-62	Validation	9658	PRCV	1 DPI
SFV-63	Validation	9658	PRCV	3 DPI
SFV-64	Validation	9658	PRCV	5 DPI
SFV-65	Validation	9658	PRCV	7 DPI
SFV-66	Validation	9662	PRCV	Pre-infection
SFV-67	Validation	9662	PRCV	1 DPI
SFV-68	Validation	9662	PRCV	3 DPI
SFV-69	Validation	9662	PRCV	5 DPI
SFV-70	Validation	9662	PRCV	7 DPI
SFV-71	Validation	9604	PRCV	Pre-infection
SFV-72	Validation	9604	PRCV	1 DPI
SFV-73	Validation	9604	PRCV	3 DPI
SFV-74	Validation	9604	PRCV	5 DPI
SFV-75	Validation	9604	PRCV	7 DPI
SFV-76	Validation	9561	PRCV	Pre-infection
SFV-77	Validation	9561	PRCV	1 DPI
SFV-78	Validation	9561	PRCV	3 DPI
SFV-79	Validation	9561	PRCV	5 DPI
SFV-80	Validation	9561	PRCV	7 DPI

## Sheet: S2
S2. Detailed list of Multiple Reaction Monitoring (MRM) transitions for endogenous peptides and their corresponding stable isotope-labelled (heavy) internal standards of candidate proteins used for validation. Data includes Protein gene symbol, Peptide sequence, precursor/product ion m/z, fragment ion, observed chromatographic retention times (RT) and optimised collision energies (CE)
								Note	^	Heavy labelled peptide
Protein Gene Symbol	Peptide Sequence	Precursor (Q1) Mass (Da)	Fragment (Q3) Mass (Da)	Fragment Ion annotation	Retention Time (min)	CE (V)
CRP	DYSLFSYATK^ 1	601.79	924.49	y8+	15.95	28
CRP	DYSLFSYATK^ 2	601.79	724.37	y6+	15.95	28
CRP	DYSLFSYATK^ 3	601.79	837.46	y7+	15.95	28
CRP	DYSLFSYATK^ 4	601.79	279.09	b2+	15.95	28
CRP	DYSLFSYATK^ 5	601.79	577.3	y5+	15.95	28
LTF	YYGYTGAFR^ 1	554.26	781.38	y7+	12.15	26
LTF	YYGYTGAFR^ 2	554.26	561.3	y5+	12.15	26
LTF	YYGYTGAFR^ 3	554.26	944.45	y8+	12.15	26
LTF	YYGYTGAFR^ 4	554.26	327.13	b2+	12.15	26
LTF	YYGYTGAFR^ 5	554.26	384.15	b3+	12.15	26
PPIA	VSFELFADK^ 1	532.282	877.453	y7+	16.23	25
PPIA	VSFELFADK^ 2	532.282	730.384	y6+	16.23	25
PPIA	VSFELFADK^ 3	532.282	187.107	b2+	16.23	25
PPIA	VSFELFADK^ 4	532.282	601.342	y5+	16.23	25
PPIA	VSFELFADK^ 5	532.282	964.483	y8+	16.23	25
PPIA	EGMNIVEAMER^ 1	644.8	744.359	y6+	15.12	31
PPIA	EGMNIVEAMER^ 2	644.8	645.293	y5+	15.12	31
PPIA	EGMNIVEAMER^ 3	644.8	971.485	y8+	15.12	31
PPIA	EGMNIVEAMER^ 4	644.8	857.442	y7+	15.12	31
PPIA	EGMNIVEAMER^ 5	644.8	516.247	y4+	15.12	31
PRDX2	IPLLADVTR^ 1	504.31	447.77	y8++	15.13	24
PRDX2	IPLLADVTR^ 2	504.31	684.39	y6+	15.13	24
PRDX2	IPLLADVTR^ 3	504.31	797.48	y7+	15.13	24
PRDX2	IPLLADVTR^ 4	504.31	571.31	y5+	15.13	24
PRDX2	IPLLADVTR^ 5	504.31	211.14	b2+	15.13	24
PRDX2	EDEGIAYR^ 1	481.729	589.334	y5+	7.96	23
PRDX2	EDEGIAYR^ 2	481.729	413.131	b4+-H2O	7.96	23
PRDX2	EDEGIAYR^ 3	481.729	348.191	y2+	7.96	23
PRDX2	EDEGIAYR^ 4	481.729	532.312	y4+	7.96	23
PRDX2	EDEGIAYR^ 5	481.729	419.228	y3+	7.96	23
RAN	LVLVGDGGTGK^ 1	512.302	811.442	y9+	10.4	24
RAN	LVLVGDGGTGK^ 2	512.302	599.29	y7+	10.4	24
RAN	LVLVGDGGTGK^ 3	512.302	698.358	y8+	10.4	24
RAN	LVLVGDGGTGK^ 4	512.302	213.161	b2+	10.4	24
RAN	LVLVGDGGTGK^ 5	512.302	185.166	a2+	10.4	24
RAN	SNYNFEKPFLWLAR^ 1	599.314	912.533	y7+	18.6	28
RAN	SNYNFEKPFLWLAR^ 2	599.314	202.082	b2+	18.6	28
RAN	SNYNFEKPFLWLAR^ 3	599.314	555.327	y4+	18.6	28
RAN	SNYNFEKPFLWLAR^ 4	599.314	797.428	y12++	18.6	28
RAN	SNYNFEKPFLWLAR^ 5	599.314	715.896	y11++	18.6	28
SOD1	TVLVTGTIK^ 1	470.304	739.484	y7+	10.52	22
SOD1	TVLVTGTIK^ 2	470.304	201.125	b2+	10.52	22
SOD1	TVLVTGTIK^ 3	470.304	626.398	y6+	10.52	22
SOD1	TVLVTGTIK^ 4	470.304	314.208	b3+	10.52	22
SOD1	TVLVTGTIK^ 5	470.304	426.28	y4+	10.52	22
SOD1	TVLVTGTIK^ 6	470.304	173.128	a2+	10.52	22
SOD1	TMVVHEKPDDLGR^ 1	502.925	682.339	y6+	7.93	24
SOD1	TMVVHEKPDDLGR^ 2	502.925	637.84	y11++	7.93	24
SOD1	TMVVHEKPDDLGR^ 3	502.925	233.095	b2+	7.93	24
SOD1	TMVVHEKPDDLGR^ 4	502.925	538.772	y9++	7.93	24
SOD1	TMVVHEKPDDLGR^ 5	502.925	355.233	y3+	7.93	24
SRGN	TDPFSMTR^ 1	482.727	374.694	y6++	11.49	23
SRGN	TDPFSMTR^ 2	482.727	748.371	y6+	11.49	23
SRGN	TDPFSMTR^ 3	482.727	504.248	y4+	11.49	23
SRGN	TDPFSMTR^ 4	482.727	651.317	y5+	11.49	23
SRGN	TDPFSMTR^ 5	482.727	217.083	b2+	11.49	23
SRGN	GPVFDLLPGESNR^ 1	705.868	669.321	y6+	16.49	34
SRGN	GPVFDLLPGESNR^ 2	705.868	782.403	y7+	16.49	34
SRGN	GPVFDLLPGESNR^ 3	705.868	742.413	b7+	16.49	34
SRGN	GPVFDLLPGESNR^ 4	705.868	1010.51	y9+	16.49	34
SRGN	GPVFDLLPGESNR^ 5	705.868	629.329	b6+	16.49	34
CRP	DYSLFSYATK 1	597.788	916.477	y8+	15.95	28
CRP	DYSLFSYATK 2	597.788	829.445	y7+	15.95	28
CRP	DYSLFSYATK 3	597.788	716.361	y6+	15.95	28
CRP	DYSLFSYATK 4	597.788	569.293	y5+	15.95	28
CRP	DYSLFSYATK 5	597.788	279.09	b2+	15.95	28
LTF	YYGYTGAFR 1	549.256	771.378	y7+	12.15	26
LTF	YYGYTGAFR 2	549.256	551.294	y5+	12.15	26
LTF	YYGYTGAFR 3	549.256	934.442	y8+	12.15	26
LTF	YYGYTGAFR 4	549.256	327.13	b2+	12.15	26
LTF	YYGYTGAFR 5	549.256	384.15	b3+	12.15	26
PPIA	VSFELFADK 1	528.274	869.44	y7+	16.23	25
PPIA	VSFELFADK 2	528.274	722.372	y6+	16.23	25
PPIA	VSFELFADK 4	528.274	593.329	y5+	16.23	25
PPIA	VSFELFADK 5	528.274	956.47	y8+	16.23	25
PPIA	VSFELFADK 3	528.274	187.107	b2+	16.23	25
PPIA	EGMNIVEAMER 1	639.794	734.35	y6+	15.12	30
PPIA	EGMNIVEAMER 2	639.794	635.282	y5+	15.12	30
PPIA	EGMNIVEAMER 3	639.794	961.477	y8+	15.146	30
PPIA	EGMNIVEAMER 4	639.794	847.434	y7+	15.12	30
PPIA	EGMNIVEAMER 5	639.794	506.239	y4+	15.12	30
PRDX2	IPLLADVTR 1	499.306	442.764	y8++	15.13	23
PRDX2	IPLLADVTR 2	499.306	674.383	y6+	15.13	23
PRDX2	IPLLADVTR 3	499.306	787.467	y7+	15.13	23
PRDX2	IPLLADVTR 4	499.306	561.299	y5+	15.13	23
PRDX2	IPLLADVTR 5	499.306	211.14	b2+	15.13	23
PRDX2	EDEGIAYR 1	476.722	579.325	y5+	7.96	22
PRDX2	EDEGIAYR 2	476.722	413.13	b4+-H2O	7.96	22
PRDX2	EDEGIAYR 3	476.722	338.182	y2+	7.96	22
PRDX2	EDEGIAYR 4	476.722	522.304	y4+	7.96	22
PRDX2	EDEGIAYR 5	476.722	409.219	y3+	7.96	22
RAN	LVLVGDGGTGK 1	508.293	803.426	y9+	10.4	24
RAN	LVLVGDGGTGK 2	508.293	591.273	y7+	10.4	24
RAN	LVLVGDGGTGK 3	508.293	690.342	y8+	10.4	24
RAN	LVLVGDGGTGK 4	508.293	213.16	b2+	10.4	24
RAN	LVLVGDGGTGK 5	508.293	185.166	a2+	10.4	24
RAN	SNYNFEKPFLWLAR 1	595.642	902.525	y7+	18.6	28
RAN	SNYNFEKPFLWLAR 2	595.642	202.082	b2+	18.6	28
RAN	SNYNFEKPFLWLAR 3	595.642	545.32	y4+	18.6	28
RAN	SNYNFEKPFLWLAR 4	595.642	792.422	y12++	18.6	28
RAN	SNYNFEKPFLWLAR 5	595.642	710.89	y11++	18.6	28
SOD1	TVLVTGTIK 1	466.295	731.466	y7+	10.52	22
SOD1	TVLVTGTIK 2	466.295	201.125	b2+	10.52	22
SOD1	TVLVTGTIK 3	466.295	618.382	y6+	10.52	22
SOD1	TVLVTGTIK 4	466.295	314.207	b3+	10.52	22
SOD1	TVLVTGTIK 5	466.295	418.266	y4+	10.52	22
SOD1	TVLVTGTIK 6	466.295	173.128	a2+	10.52	22
SOD1	TMVVHEKPDDLGR 1	499.589	672.331	y6+	7.93	23
SOD1	TMVVHEKPDDLGR 2	499.589	632.836	y11++	7.93	23
SOD1	TMVVHEKPDDLGR 3	499.589	233.095	b2+	7.93	23
SOD1	TMVVHEKPDDLGR 4	499.589	533.767	y9++	7.93	23
SOD1	TMVVHEKPDDLGR 5	499.589	345.224	y3+	7.93	23
SRGN	TDPFSMTR 1	477.721	369.684	y6++	11.49	22
SRGN	TDPFSMTR 2	477.721	738.36	y6+	11.49	22
SRGN	TDPFSMTR 3	477.721	494.239	y4+	11.49	22
SRGN	TDPFSMTR 4	477.721	641.308	y5+	11.49	22
SRGN	TDPFSMTR 5	477.721	217.083	b2+	11.49	22
SRGN	GPVFDLLPGESNR 1	700.862	659.311	y6+	16.49	33
SRGN	GPVFDLLPGESNR 2	700.862	772.395	y7+	16.49	33
SRGN	GPVFDLLPGESNR 3	700.862	742.413	b7+	16.49	33
SRGN	GPVFDLLPGESNR 4	700.862	1000.51	y9+	16.49	33
SRGN	GPVFDLLPGESNR 5	700.862	629.329	b6+	16.49	33

## Sheet: S3
S3. Spectronaut output file containing normalised summed protein group intensities for protein groups and GO ontology across all swine serum samples
PG.ProteinGroups	PG.ProteinAccessions	PG.Genes	PG.Organisms	PG.ProteinDescriptions	PG.NrOfStrippedSequencesIdentified (Experiment-wide)	PG.NrOfPrecursorsIdentified (Experiment-wide)	PG.CellularComponent	PG.BiologicalProcess	PG.MolecularFunction	PG.IsCandidate	PG.Completeness	PG.CV	PG.AvgLog2Quantity	PG.Pvalue	PG.PEP	[1] SF-2_STRAP_21min_85vw_250ng_1.wiff.PG.Quantity	[2] SF-27_STRAP_21min_85vw_250ng_1.wiff.PG.Quantity	[3] SF-69_STRAP_21min_85vw_250ng_1.wiff.PG.Quantity	[4] SF-37_STRAP_21min_85vw_250ng_1.wiff.PG.Quantity	[5] SF-20_STRAP_21min_85vw_250ng_1.wiff.PG.Quantity	[6] SF-7_STRAP_21min_85vw_250ng_1.wiff.PG.Quantity	[7] SF-P1-TP3_STRAP_21min_85vw_250ng_8.wiff.PG.Quantity	[8] SF-41_STRAP_21min_85vw_250ng_1.wiff.PG.Quantity	[9] SF-33_STRAP_21min_85vw_250ng_1.wiff.PG.Quantity	[10] SF-19_STRAP_21min_85vw_250ng_1.wiff.PG.Quantity	[11] SF-P1-TP5_STRAP_21min_85vw_250ng_2.wiff.PG.Quantity	[12] SF-52_STRAP_21min_85vw_250ng_1.wiff.PG.Quantity	[13] SF-80_STRAP_21min_85vw_250ng_1.wiff.PG.Quantity	[14] SF-1_STRAP_21min_85vw_250ng_1.wiff.PG.Quantity	[15] SF-P1-TP3_STRAP_21min_85vw_250ng_7.wiff.PG.Quantity	[16] SF-73_STRAP_21min_85vw_250ng_1.wiff.PG.Quantity	[17] SF-P2-TP2_STRAP_21min_85vw_250ng_2.wiff.PG.Quantity	[18] SF-29_STRAP_21min_85vw_250ng_1.wiff.PG.Quantity	[19] SF-12_STRAP_21min_85vw_250ng_1.wiff.PG.Quantity	[20] SF-P1-TP2_STRAP_21min_85vw_250ng_1.wiff.PG.Quantity	[21] SF-P1-TP3_STRAP_21min_85vw_250ng_3.wiff.PG.Quantity	[22] SF-P1-TP2_STRAP_21min_85vw_250ng_2.wiff.PG.Quantity	[23] SF-72_STRAP_21min_85vw_250ng_1.wiff.PG.Quantity	[24] SF-25_STRAP_21min_85vw_250ng_1.wiff.PG.Quantity	[25] SF-51_STRAP_21min_85vw_250ng_1.wiff.PG.Quantity	[26] SF-56_STRAP_21min_85vw_250ng_1.wiff.PG.Quantity	[27] SF-68_STRAP_21min_85vw_250ng_1.wiff.PG.Quantity	[28] SF-43_STRAP_21min_85vw_250ng_1.wiff.PG.Quantity	[29] SF-18_STRAP_21min_85vw_250ng_1.wiff.PG.Quantity	[30] SF-21_STRAP_21min_85vw_250ng_1.wiff.PG.Quantity	[31] SF-44_STRAP_21min_85vw_250ng_1.wiff.PG.Quantity	[32] SF-82_STRAP_21min_85vw_250ng_1.wiff.PG.Quantity	[33] SF-P1-TP5_STRAP_21min_85vw_250ng_1.wiff.PG.Quantity	[34] SF-42_STRAP_21min_85vw_250ng_1.wiff.PG.Quantity
A0A075B7H8	A0A075B7H8		Sus scrofa	Ig-like domain-containing protein	1	2	extracellular space	immunoglobulin production,immune response		TRUE	26.8	1.02614	5.3221	7.25836e-07	1.30631e-06	NaN	35.899	NaN	NaN	NaN	20.1427	NaN	NaN	NaN	25.7625	NaN	26.5127	NaN	42.0371	38.0669	NaN	32.0407	NaN	NaN	NaN	NaN	NaN	NaN	57.5028	NaN	29.9204	NaN	NaN	NaN	NaN	NaN	NaN	34.3405	NaN
A0A075B7H9	A0A075B7H9		Sus scrofa	Ig-like domain-containing protein	4	10				FALSE	100	0.300247	11.9208	1.13451e-13	1.77139e-13	4029.54	4273.72	4677.47	3305.23	4724.7	4431.23	3493.86	2830.73	3016.53	3987.76	4033.25	1536.15	6278.01	3972.21	3707.62	4813.6	3992.27	3558.42	1166.66	4675.1	3718.16	4278.68	3168.26	4142.65	2988.07	3424.46	4476.36	6850.95	3273.91	3240.93	5090.2	2975.6	3901.2	7927.64
A0A075B7I5	A0A075B7I5		Sus scrofa	Ig-like domain-containing protein	5	8	extracellular space	immunoglobulin production,immune response		FALSE	100	0.268712	12.0424	3.52039e-15	6.50172e-15	3422.77	4638.46	3972.91	2899.7	3927.81	3751.11	4700.31	2554.27	4458.9	5000.42	4317.1	3487.56	6252.33	3926.17	4154.61	4361.44	4296.14	4113.11	2669.52	4147.35	3928.02	4365.54	3399.88	4559.6	2676.56	3479.98	6960.25	6046.74	2882.25	2686.09	4875.03	2682.01	4686.7	6846.76
A0A075B7I6	A0A075B7I6		Sus scrofa	Ig-like domain-containing protein	6	14				FALSE	100	0.270605	11.1783	5.16412e-16	1.13259e-15	2041.18	2407.99	2785.4	1675.38	2155.25	1881.1	2507.89	1657.8	1117.52	3190.56	2288.34	1785.45	2669.79	1845.16	2668.46	2952.35	2312.09	2022.28	2257.77	2206.38	2402.97	2359.64	2541.91	2447.35	2333.48	3133.74	2847.22	2214.07	1917.53	1736.84	2239.91	2160.62	2391.34	5609.5
A0A075B7I9	A0A075B7I9		Sus scrofa	Ig-like domain-containing protein	3	5	extracellular space	immunoglobulin production,immune response		FALSE	100	0.356558	8.28507	2.69414e-13	4.15173e-13	187.901	299.274	281.236	329.407	257.593	229.41	285.699	272.771	318.17	426.784	316.655	465.847	323.381	141.963	321.26	275.973	333.12	160.726	362.192	307.417	408.519	465.394	436.777	348.705	154.055	239.607	473.22	292.065	210.797	182.976	343.137	234.879	333.781	341.673
A0A075B7J0	A0A075B7J0		Sus scrofa	Ig-like domain-containing protein	2	3	extracellular space	immunoglobulin production,immune response		TRUE	100	0.505808	10.7626	1.5006e-12	2.32499e-12	1819.55	1170.71	1653.98	2088.13	1207.2	1654.27	1615.84	1806.36	666.133	721.837	1749.28	5275.44	3353.98	1195.17	1326.95	2283.64	2597.5	1307.69	2668.11	2622.58	1707.88	2615.48	2127.28	971.586	1082.2	1942.87	985.045	2161.24	1727.07	1649.52	2089.37	1295.7	1733.92	3419.08
A0A0A0MY58;P01846	A0A0A0MY58;P01846		Sus scrofa	Ig-like domain-containing protein;Ig lambda chain C region	14	30	external side of plasma membrane,immunoglobulin complex, circulating,blood microparticle;	phagocytosis, recognition,phagocytosis, engulfment,complement activation, classical pathway,defense response to bacterium,innate immune response,B cell receptor signaling pathway,positive regulation of B cell activation;	antigen binding,immunoglobulin receptor binding;antigen binding	FALSE	100	0.230173	14.3086	1.43836e-15	2.8585e-15	17922.3	21811.9	21326.2	14834.4	19064.3	19819.3	22609.6	14697.8	19442.6	21990.6	20859.1	18355	27415.2	18961.3	22550.3	22569.4	19799.7	16083.5	14480.9	20586.3	22199.3	20628.8	18280.6	19599.9	14868.7	17793.4	28000.1	27158.7	14803.3	15002.3	23774.4	15009.9	20449.4	40158.4
A0A0H5ANC0	A0A0H5ANC0	OGN	Sus scrofa	Osteoglycin	5	5	extracellular space,extracellular matrix			FALSE	100	0.180109	5.03668	1.59552e-13	2.47506e-13	24.4316	41.62	34.1152	34.2843	33.6486	29.9964	33.9579	36.959	24.4512	33.6332	36.4017	32.6008	39.2934	27.9347	30.1626	38.5595	36.162	32.4313	39.438	30.8074	38.201	32.9232	39.7399	37.4831	28.4714	29.4504	39.744	40.0219	36.0486	36.3219	24.3589	35.6925	30.4473	39.6629
A0A286ZFW3	A0A286ZFW3	APOH	Sus scrofa	Beta-2-glycoprotein 1	18	40				FALSE	100	0.0951083	13.0527	1.77464e-17	5.98128e-17	9045.09	10324.9	6961.2	7541.18	8230.65	9313	8116.66	9675.68	8532.73	10012.9	8461.69	8627.31	7681.32	7750.48	7924.33	7442.36	8596.77	9442.18	8814.84	8754.54	7966.79	8674.3	6452.58	9487.28	9510.21	8713.33	8592.8	9946.58	8298.55	8670.94	7754.95	9177.5	8306.9	8820.54
A0A286ZHV7	A0A286ZHV7	HSPG2	Sus scrofa	Heparan sulfate proteoglycan 2	12	12				FALSE	100	0.1695	4.88461	3.63791e-13	5.59499e-13	34.8104	39.0361	26.7955	32.257	20.6167	30.4798	24.8887	39.1295	30.5355	40.7866	35.24	27.3502	25.6518	31.8585	22.4071	24.6507	28.2383	32.3702	37.8544	32.8586	29.4626	31.6971	39.6172	35.7852	37.6253	28.9478	38.3306	31.8847	32.5223	33.342	33.7489	23.7942	32.7604	35.6658
A0A286ZI36	A0A286ZI36	PKM	Sus scrofa	Pyruvate kinase	14	17				FALSE	100	0.550848	5.01883	2.26088e-14	3.729e-14	20.87	40.9267	21.7008	31.4334	85.6867	76.5987	33.2759	83.5357	32.2785	57.1895	36.3845	21.4722	17.4016	17.3017	34.8567	24.9538	32.7818	23.5043	26.8098	33.2039	36.2135	34.4813	28.4821	21.3494	19.6288	76.0382	31.4296	26.7053	30.9826	18.2187	20.8342	58.2772	40.0259	24.2551
A0A286ZI97	A0A286ZI97	PGLYRP1	Sus scrofa	Peptidoglycan-recognition protein	2	2		peptidoglycan catabolic process,innate immune response	zinc ion binding,N-acetylmuramoyl-L-alanine amidase activity,peptidoglycan binding	FALSE	45.5	0.42291	4.49663	7.45858e-09	1.4455e-08	22.0166	NaN	19.9574	NaN	17.5838	NaN	15.924	8.52879	19.0523	NaN	11.2672	34.3608	NaN	32.6129	32.2722	NaN	NaN	NaN	28.5257	23.1155	NaN	17.0852	23.2455	13.2385	34.6235	NaN	NaN	NaN	49.7123	22.5966	NaN	22.059	NaN	51.3196
A0A286ZIL9	A0A286ZIL9	COL18A1	Sus scrofa	Collagen type XVIII alpha 1 chain	4	4				FALSE	99.1	0.241226	4.60037	1.30308e-12	2.01511e-12	25.2383	39.4716	18.8272	20.8526	21.4982	31.4803	21.6004	21.3227	13.7175	28.5852	30.7736	27.1265	22.8349	20.6826	18.8019	22.0486	25.2672	26.4572	17.4441	26.7146	23.9195	19.4833	21.0474	17.9093	27.4093	12.6548	30.5394	24.5039	26.8185	23.1821	21.0088	22.8224	24.5653	46.1739
A0A286ZIM1;A0A8W4FDG3	A0A286ZIM1;A0A8W4FDG3		Sus scrofa	Ig-like domain-containing protein	2	5	;	;	;	FALSE	100	0.161918	6.65247	2.83773e-12	4.44777e-12	103.85	103.237	79.9238	121.944	83.4745	86.8827	93.6451	106.291	98.3285	99.0071	98.3187	97.2967	112.227	98.4599	98.1797	99.377	114.69	99.9041	74.9749	106.499	110.341	94.4137	96.3335	120.724	73.0627	82.4129	112.185	104.084	132.775	82.6344	93.0374	68.5926	110.581	160.412
A0A286ZJL9	A0A286ZJL9		Sus scrofa	Ig-like domain-containing protein	6	17				FALSE	100	0.736309	9.88394	1.57049e-15	3.09705e-15	498.192	514.804	1209.34	1006.27	892.619	611.606	1123.48	599.818	655.603	439.75	1040.69	1404.68	821.54	565.579	1028.67	1009.23	994.443	630.564	1276.71	1128.68	1035.59	1148.25	894.323	480.52	514.703	496.722	666.167	838.739	796.56	1509.91	2042.85	414.255	1119.36	6249.2
A0A286ZL46	A0A286ZL46	FCER2	Sus scrofa	Fc epsilon receptor II	1	1				FALSE	92.9	0.512067	5.32058	2.37102e-12	3.70246e-12	58.2601	15.615	72.6209	50.4602	49.04	37.1862	18.2311	71.4668	29.6195	50.3926	68.002	46.1858	29.4654	40.6733	42.6999	18.4079	14.2091	10.1267	48.264	56.6723	49.6716	42.1454	45.1905	76.3314	28.3701	54.2062	61.5001	70.2236	25.5211	33.1442	52.4421	6.28721	80.6717	30.8312
A0A286ZLG5	A0A286ZLG5	NBL1	Sus scrofa	Neuroblastoma suppressor of tumorigenicity 1	1	1				FALSE	28.6	0.834206	1.22497	4.00866e-11	6.84598e-11	6.49059	NaN	1.25709	NaN	NaN	1.2098	NaN	NaN	NaN	0.722448	1.23993	1.24393	NaN	NaN	NaN	NaN	NaN	NaN	12.6607	NaN	2.59	NaN	NaN	2.01235	1.16558	NaN	1.80338	NaN	NaN	NaN	6.65713	NaN	NaN	NaN
A0A286ZLN6;A0A287A3T6	A0A286ZLN6;A0A287A3T6		Sus scrofa	Uncharacterized protein;Ig-like domain-containing protein	1	1	;	;	;	FALSE	56.2	0.400138	4.96644	1.34763e-07	2.51046e-07	NaN	NaN	NaN	27.7991	34.3062	30.4486	34.054	37.0443	NaN	28.708	34.9416	NaN	27.7403	55.1704	NaN	NaN	29.7898	23.2131	26.9653	NaN	NaN	24.6181	41.4315	NaN	NaN	NaN	NaN	45.7316	27.6186	37.6828	NaN	NaN	26.7139	46.3081
A0A286ZMP2	A0A286ZMP2	RAB7A	Sus scrofa	RAB7A, member RAS onco family	1	1				FALSE	31.2	0.660336	4.77426	7.14196e-05	0.000115031	NaN	26.984	NaN	121.727	32.4241	NaN	NaN	23.1404	NaN	32.3679	NaN	NaN	NaN	NaN	NaN	NaN	NaN	NaN	NaN	NaN	NaN	21.4254	84.3009	NaN	NaN	NaN	40.9146	NaN	35.6581	7.49835	52.5913	NaN	NaN	NaN
A0A286ZMU4;A0A8W4FLJ3	A0A286ZMU4;A0A8W4FLJ3		Sus scrofa	Ig-like domain-containing protein	3	4	;	;	;	FALSE	100	0.245116	7.73618	3.6435e-16	8.29264e-16	215.488	207.036	213.466	122.798	162.223	226.827	240.89	141.067	273.975	107.101	217.364	230.112	212.476	192.639	259.965	189.011	201.83	153.5	204.905	183.053	237.072	195.452	308.35	193.096	155.532	267.03	216.618	210.393	210.989	273.467	268.377	202.131	193.01	335.059
A0A286ZMW3	A0A286ZMW3	HGFAC	Sus scrofa	HGF activator	18	31	extracellular region	proteolysis	serine-type endopeptidase activity	FALSE	100	0.102082	7.9167	2.61709e-16	6.17971e-16	225.519	264.271	210.255	205.62	237.826	223.55	245.094	262.115	289.316	288.221	227.785	252.989	201.902	263.562	237.463	234.683	231.478	208.228	219.339	232.523	250.061	243.968	232.745	258.065	239.659	237.875	285.992	204.526	235.459	231.014	226.009	204.378	232.93	212.218
A0A286ZN27;A0A287A217;A0A287AEI4;A0A480UV25;P02554;Q767L7	A0A286ZN27;A0A287A217;A0A287AEI4;A0A480UV25;P02554;Q767L7	TUBB2A;TUBB4B;TUBB2B;TUBB4A;;TUBB	Sus scrofa	Tubulin beta chain;Tubulin beta 4B class IVb;Tubulin beta chain;Tubulin beta chain;Tubulin beta chain;Tubulin beta chain	1	1	;microtubule;;;cytoplasm,microtubule;cytoplasm,microtubule	;cytoskeleton organization,microtubule-based process;;;cytoskeleton organization,microtubule-based process;cytoskeleton organization,microtubule-based process	;GTPase activity,structural constituent of cytoskeleton,GTP binding;;;GTPase activity,structural constituent of cytoskeleton,protein binding,GTP binding;GTPase activity,structural constituent of cytoskeleton,protein binding,GTP binding	FALSE	45.5	0.491034	4.78943	1.10587e-07	2.06831e-07	NaN	NaN	NaN	80.002	23.9486	37.9435	39.1097	24.625	NaN	NaN	NaN	NaN	NaN	NaN	NaN	18.4454	33.2164	NaN	NaN	25.0611	NaN	33.4343	NaN	NaN	NaN	NaN	32.0266	NaN	NaN	21.177	NaN	NaN	20.2389	NaN
A0A286ZN52	A0A286ZN52	PSMB3	Sus scrofa	Proteasome subunit beta	4	5	nucleus,cytoplasm,proteasome core complex, beta-subunit complex	proteasome-mediated ubiquitin-dependent protein catabolic process	threonine-type endopeptidase activity	FALSE	100	0.263012	5.38031	8.29657e-13	1.27733e-12	44.3855	49.8405	33.0143	89.3997	38.3317	57.0994	43.7332	35.5973	33.4651	41.3232	49.5744	24.3703	32.1301	44.1088	44.9085	52.3209	45.218	31.3421	36.0996	37.8833	31.0727	39.189	62.4176	51.2286	37.4243	64.3908	48.5683	8.7503	31.7403	60.1804	31.312	39.7181	42.8042	42.7049
A0A286ZNH3	A0A286ZNH3	RIDA	Sus scrofa	2-iminobutanoate/2-iminopropanoate deaminase	4	4				FALSE	8	0.770035	3.74067	0.000863503	0.00124161	NaN	NaN	NaN	46.3488	14.1094	NaN	NaN	NaN	NaN	NaN	NaN	NaN	NaN	NaN	NaN	NaN	NaN	NaN	NaN	NaN	NaN	9.29826	NaN	NaN	NaN	NaN	NaN	NaN	NaN	NaN	NaN	NaN	NaN	NaN
A0A286ZNY1;A0A5G2QX54;F1SHC1;F2Z5T5;P02550;Q2XVP4	A0A286ZNY1;A0A5G2QX54;F1SHC1;F2Z5T5;P02550;Q2XVP4	TUBA4A;LOC100127131;TUBA1A;TUBA1A;TUBA1B	Sus scrofa	Tubulin alpha chain;Tubulin alpha chain;Tubulin alpha chain;Tubulin alpha chain;Tubulin alpha-1A chain;Tubulin alpha-1B chain	2	2	cytoplasm,microtubule;;cytoplasmic microtubule;;cytoplasm,microtubule;cytoplasm,microtubule	cytoskeleton organization,microtubule-based process;;cytoskeleton organization,microtubule-based process;;cytoskeleton organization,microtubule-based process;cytoskeleton organization,microtubule-based process	GTPase activity,structural constituent of cytoskeleton,GTP binding;;GTPase activity,structural constituent of cytoskeleton,GTP binding;;GTPase activity,structural constituent of cytoskeleton,GTP binding;GTPase activity,structural constituent of cytoskeleton,GTP binding	FALSE	51.8	0.540149	3.97548	1.35158e-05	2.28767e-05	NaN	NaN	NaN	50.1559	19.8873	4.45483	11.9819	18.9693	27.1115	NaN	28.2289	NaN	NaN	17.0784	18.1203	NaN	NaN	NaN	7.55444	12.4259	7.84155	16.3403	19.5022	NaN	NaN	NaN	35.24	NaN	7.99041	NaN	17.6145	NaN	14.5375	23.8298
A0A286ZPA0	A0A286ZPA0	LOC100520329	Sus scrofa	Amine oxidase	9	15				FALSE	89.3	0.842359	6.44003	2.88428e-16	6.73633e-16	14.2708	14.1449	331.074	353.854	NaN	23.1645	167.424	340.914	21.5142	15.5943	166.442	NaN	280.193	16.3846	179.043	335.658	143.537	278.189	40.6537	139.146	151.295	131.981	23.2125	20.4956	320.526	302.651	235.074	28.264	14.963	392.201	339.96	338.305	132.228	372.923
A0A286ZPE3	A0A286ZPE3	HNRNPA1	Sus scrofa	Heteroous nuclear ribonucleoprotein A1	2	3			RNA binding	FALSE	17.9	0.658267	4.38755	9.08545e-08	1.70585e-07	15.3472	NaN	NaN	NaN	NaN	NaN	NaN	NaN	23.366	NaN	NaN	NaN	NaN	NaN	NaN	NaN	NaN	NaN	NaN	21.4589	NaN	25.2787	NaN	NaN	15.8427	NaN	51.1367	NaN	22.4781	NaN	NaN	NaN	25.8531	NaN
A0A286ZPG0	A0A286ZPG0		Sus scrofa	Apolipoprotein C-IV	6	9				FALSE	100	0.295973	6.5515	1.77464e-17	5.98128e-17	87.4792	104.499	72.9629	99.5658	98.0089	137.857	91.5209	74.2025	61.288	65.7499	91.2465	76.6437	117.517	51.4215	81.9473	139.985	86.652	68.2776	157.226	95.8865	99.8436	100.871	74.5767	115.932	44.3142	104.632	141.468	109.757	66.3652	77.2809	68.552	109.835	84.1594	65.7832
A0A286ZQ31	A0A286ZQ31	BPGM	Sus scrofa	Phosphoglycerate mutase	9	12		glycolytic process	bisphosphoglycerate mutase activity,phosphoglycerate mutase activity	FALSE	57.1	1.55038	5.10277	2.91992e-12	4.57946e-12	NaN	25.3526	NaN	589.71	34.9599	40.0999	43.4893	24.1196	NaN	20.1887	36.3117	NaN	NaN	NaN	26.7531	18.1683	23.2275	NaN	NaN	41.9142	NaN	29.6605	106.86	11.0161	8.63796	NaN	78.9425	NaN	29.5286	NaN	38.5442	NaN	38.916	NaN
A0A286ZQ85	A0A286ZQ85	COL3A1	Sus scrofa	Collagen type III alpha 1 chain	7	7				FALSE	100	0.236512	4.83391	7.46969e-14	1.17845e-13	23.2065	38.0137	31.0595	22.8636	24.0851	28.7212	34.2563	31.6415	23.3518	22.844	26.0491	19.6877	26.5123	37.7424	25.6462	38.3806	30.4519	28.1838	31.5158	27.0233	23.1822	24.7989	24.4338	38.956	32.1092	45.5825	36.6356	42.5265	24.0734	32.1232	15.5602	35.4785	24.866	26.8597
A0A286ZQJ9	A0A286ZQJ9	LOC110258310	Sus scrofa	C1q domain-containing protein	3	7	integral component of membrane			FALSE	100	0.113213	10.3197	2.23138e-13	3.4452e-13	1218.22	1347.57	1208.07	1272.8	1305.55	1260.97	1261.29	1262.54	1395.29	1510.68	1221.54	1414.68	1382.24	1201.43	1258.53	1455.41	1260.33	1373.2	1431.27	1195.08	1287.03	1374.74	850.875	1357.34	1368.79	1567.86	1413.32	1078.77	1315.61	1248.64	1146.8	1289.61	1335.05	1253.22
A0A286ZRX5	A0A286ZRX5	SPARCL1	Sus scrofa	SPARC like 1	1	1	proteinaceous extracellular matrix,extracellular space	signal transduction	calcium ion binding,collagen binding,extracellular matrix binding	FALSE	12.5	0.422756	3.27011	9.99153e-10	1.90044e-09	NaN	NaN	NaN	NaN	7.48552	NaN	NaN	NaN	NaN	9.08881	NaN	NaN	NaN	NaN	11.2312	NaN	NaN	NaN	NaN	NaN	2.8998	NaN	NaN	15.006	NaN	NaN	NaN	NaN	NaN	NaN	NaN	NaN	NaN	NaN
A0A286ZS32	A0A286ZS32	CORO2B	Sus scrofa	Coronin	1	1				FALSE	29.5	0.606664	3.5365	0.00163277	0.00225406	NaN	19.2789	NaN	NaN	NaN	NaN	NaN	11.1444	NaN	NaN	NaN	NaN	19.5394	10.9665	NaN	22.5788	15.4155	NaN	NaN	NaN	NaN	NaN	20.8302	NaN	NaN	NaN	7.09256	12.3487	7.35478	20.6153	NaN	NaN	7.0942	38.5535
A0A286ZSJ7	A0A286ZSJ7	C1QC	Sus scrofa	Complement C1q C chain	8	15	extracellular region,collagen trimer			FALSE	100	0.127094	7.90034	1.33079e-15	2.66313e-15	227.683	210.258	255.08	238.97	176.015	205.96	234.805	274.42	238.982	180.218	243.441	241.453	287.625	263.875	235.429	260.103	269.933	233.06	227.89	247.56	250.064	230.978	233.857	260.716	270.164	241.943	225.687	251.906	224.544	194.925	164.758	254.335	246.63	312.213
A0A286ZSW5	A0A286ZSW5		Sus scrofa	AIG1-type G domain-containing protein	1	1				FALSE	66.1	0.43717	5.03538	1.53964e-05	2.5974e-05	65.298	47.8712	44.7058	46.0303	48.3588	NaN	27.2649	19.8102	19.7894	10.4998	25.3706	41.2759	67.476	NaN	29.5481	NaN	78.0831	16.7522	24.4878	NaN	NaN	42.4334	39.8026	35.2256	35.889	NaN	35.3799	NaN	28.239	51.9619	19.0086	61.1988	40.3081	40.0211
A0A286ZSX6	A0A286ZSX6		Sus scrofa	Ig-like domain-containing protein	3	6				FALSE	100	0.276188	8.9558	4.51379e-13	6.93767e-13	326.436	434.224	451.295	593.209	424.021	342.069	440.653	330.111	457.155	477.78	455.031	568.957	568.4	319.529	476.621	513.455	524.449	428.567	363.089	561.43	435.794	516.421	645.546	388.681	409.064	534.693	523.596	378.31	398.741	477.191	566.177	481.768	493.596	1142.76
A0A286ZTA4	A0A286ZTA4	ALDOB	Sus scrofa	Fructose-bisphosphate aldolase	2	2		glycolytic process	fructose-bisphosphate aldolase activity	FALSE	50	0.489917	3.54124	2.57599e-14	4.22362e-14	NaN	8.78376	NaN	NaN	9.25203	11.8199	15.6957	10.9117	10.2874	10.8962	NaN	NaN	NaN	11.9627	NaN	6.02795	NaN	NaN	NaN	14.9045	NaN	7.74681	15.1641	17.2382	11.7748	25.1542	8.72205	NaN	NaN	NaN	17.7096	NaN	15.2718	21.4409
A0A286ZTX3	A0A286ZTX3	BTD	Sus scrofa	Biotinidase	19	33				FALSE	100	0.190915	6.84688	1.77464e-17	5.98128e-17	147.759	80.8652	99.7915	119.226	122.99	156.938	119.699	98.9325	124.552	97.1565	123.143	102.122	77.5704	123.873	124.315	112.282	121.427	108.959	115.819	107.801	119.18	117.121	173.341	81.6643	93.8443	100.102	124.14	121.136	162.924	157.012	152.988	89.5298	110.607	145.342
A0A286ZUH0	A0A286ZUH0	CALD1	Sus scrofa	Caldesmon 1	5	5				TRUE	81.2	0.767348	2.88237	7.88293e-14	1.2418e-13	3.99774	16.7588	4.17917	17.7543	8.86326	2.17065	11.3234	10.1443	8.32808	13.7777	16.6433	NaN	NaN	4.54531	13.051	1.36355	NaN	7.7327	2.92431	5.93713	9.87159	11.646	45.4117	5.38415	3.34388	NaN	4.37357	7.74913	10.9345	3.83801	27.5613	NaN	5.36877	NaN
A0A286ZUI3	A0A286ZUI3		Sus scrofa	Eukaryotic translation elongation factor 1 alpha 1	4	4				FALSE	73.2	0.387409	5.17645	2.97179e-13	4.57598e-13	NaN	19.4073	23.2159	81.4142	45.2713	51.564	33.7972	18.7691	101.301	31.5253	38.0609	29.4392	NaN	68.9441	18.3742	NaN	37.1142	NaN	NaN	17.7923	44.0524	24.2703	35.025	NaN	29.7281	NaN	58.694	19.3102	43.3655	8.74847	45.0339	16.5999	47.9299	58.0244
A0A286ZUL8	A0A286ZUL8		Sus scrofa	Ig-like domain-containing protein	8	17				FALSE	100	0.269931	11.5802	7.06457e-15	1.24284e-14	3389.48	3241.08	1969.81	2416.21	2589.53	3285.29	3329.57	2795.61	3252.6	1911.82	3080.82	4067.6	2922.05	3861.76	3304.71	1840.32	2817.38	3256.84	3461.12	2875	2751.06	3028.63	2122.42	3729.46	3031.02	3020.22	2037.57	3549.03	4770.31	3347.8	3140.24	3462.79	3401.21	5325.17
A0A286ZUT9	A0A286ZUT9	ADAMDEC1	Sus scrofa	ADAM like decysin 1	2	2				TRUE	100	0.339856	4.89368	1.40971e-15	2.80657e-15	47.167	42.5536	30.2517	25.0726	38.5782	61.6419	25.4869	21.9768	58.5938	30.1181	32.2952	23.1443	31.6718	29.7299	50.9957	20.0504	32.4625	33.2862	23.0413	34.0156	42.2936	27.4558	48.8112	30.8225	22.3292	24.8672	43.7414	38.0338	66.6427	48.992	30.7604	21.4413	30.6367	29.886
A0A286ZUY9	A0A286ZUY9	A1BG	Sus scrofa	Alpha-1-B glycoprotein	25	57				FALSE	100	0.239744	12.5434	1.16171e-15	2.35362e-15	4687.36	3679.8	4085.31	7498.75	8489.3	5106.68	5912.19	4697.59	8050.9	6041.69	6107.11	8382.44	4705.82	6764	5801.84	4744.69	5871.8	7909.26	4693.18	5927.07	5869.96	6157.53	6390.29	3364.46	5357.84	5547.46	5048.54	6873.67	6700.13	6714.49	6289.16	5517.15	6179.08	8352.25
A0A286ZVB7;P45846	A0A286ZVB7;P45846	DPT	Sus scrofa	Dermatopontin	2	2	;proteinaceous extracellular matrix,extracellular space,extracellular matrix	;cell adhesion,collagen fibril organization	;	FALSE	77.7	0.393328	3.90519	4.72978e-08	8.9879e-08	24.5174	NaN	22.4793	NaN	NaN	13.3666	23.1716	13.8263	11.6912	NaN	19.616	16.1487	22.1219	8.47218	15.2428	12.6539	37.9917	NaN	23.9973	15.1814	NaN	16.312	2.4235	11.6877	16.2157	25.7059	12.8138	9.69545	9.56167	NaN	NaN	14.0986	8.54998	22.4059
A0A286ZVG7	A0A286ZVG7	COL6A3	Sus scrofa	Collagen type VI alpha 3 chain	50	54				FALSE	100	0.116114	5.95263	1.77464e-17	5.98128e-17	66.3956	69.6502	57.0797	53.8401	58.4834	64.1181	57.6454	67.9367	62.0445	71.5513	56.0175	56.5225	57.3407	69.6604	64.2911	62.4799	59.1656	63.7197	74.8686	61.1456	60.4014	61.2901	56.8993	74.8904	60.3481	60.7905	63.1843	72.1377	63.091	63.3204	39.1807	60.6257	58.932	75.5148
A0A286ZVI5	A0A286ZVI5	PPP6R3	Sus scrofa	Protein phosphatase 6 regulatory subunit 3	1	1				FALSE	4.5	1.28686	3.18487	7.13037e-05	0.00011485	NaN	6.18409	NaN	47.0964	NaN	NaN	NaN	NaN	NaN	NaN	NaN	NaN	NaN	NaN	NaN	NaN	NaN	NaN	NaN	NaN	NaN	6.58363	NaN	NaN	NaN	NaN	NaN	NaN	NaN	NaN	NaN	NaN	NaN	NaN
A0A286ZVJ2	A0A286ZVJ2	RAP1B	Sus scrofa	small monomeric GTPase	6	7				FALSE	94.6	0.820073	5.0958	7.3708e-13	1.13399e-12	38.1011	42.014	19.046	247.959	28.8745	32.6645	35.2724	32.1552	40.4633	48.1807	37.8585	NaN	25.5606	32.7488	38.3893	29.4574	40.5007	14.9352	30.1684	40.6689	27.5262	39.1033	168.889	29.7639	26.2549	10.2707	52.2519	25.0417	36.8218	24.7936	110.005	31.5417	46.0356	26.9369
A0A286ZVK1	A0A286ZVK1	F11	Sus scrofa	Coagulation factor XI	20	21	extracellular region	proteolysis,blood coagulation	serine-type endopeptidase activity	FALSE	100	0.123307	7.2283	1.77464e-17	5.98128e-17	151.1	122.384	199.128	170.237	129.679	152.411	159.175	125.826	140.741	120.999	153.423	155.416	180.782	130.096	171.01	185.659	144.979	97.6117	124.699	155.781	141.944	147.401	137.785	127.358	192.659	177.093	183.177	127.7	134.941	164.348	127.189	179.339	158.233	122.668
A0A286ZVT6	A0A286ZVT6	NUCB1	Sus scrofa	Nucleobindin 1	7	8				FALSE	96.4	0.370829	4.65861	6.36174e-13	9.78122e-13	15.1375	19.117	NaN	36.1047	38.6752	60.4011	30.3855	26.9546	18.095	11.6628	23.6074	23.6353	NaN	19.7268	27.8981	26.1864	29.5439	15.4982	19.3781	17.5709	35.6915	27.0532	21.2377	23.6156	26.0115	18.5312	28.6194	14.607	26.3429	24.752	13.3442	29.0143	28.4772	23.7447
A0A286ZW70	A0A286ZW70	PPIB	Sus scrofa	Peptidyl-prolyl cis-trans isomerase	1	1		protein peptidyl-prolyl isomerization,protein folding	peptidyl-prolyl cis-trans isomerase activity	FALSE	34.8	0.515162	4.08765	0.000642043	0.00093877	NaN	17.4821	NaN	35.4703	15.9833	NaN	NaN	19.3529	22.1133	NaN	NaN	NaN	NaN	NaN	7.951	NaN	17.1603	NaN	10.9908	24.3443	10.2519	NaN	51.9719	NaN	NaN	NaN	NaN	NaN	19.9824	9.43735	33.3064	NaN	8.66817	NaN
A0A286ZWI1	A0A286ZWI1	ALDOC	Sus scrofa	Fructose-bisphosphate aldolase	1	1				FALSE	51.8	0.496331	5.12689	6.15257e-11	1.06848e-10	NaN	37.0959	NaN	31.561	68.2482	75.5479	24.0691	36.5727	NaN	57.1887	19.3181	NaN	NaN	NaN	26.5243	36.255	25.7588	NaN	16.887	26.0417	NaN	38.3702	NaN	NaN	NaN	35.7027	16.4641	NaN	NaN	18.1048	NaN	38.0723	29.5875	19.9791
A0A286ZWK2	A0A286ZWK2	HSPA8	Sus scrofa	Heat shock protein family A (Hsp70) member 8	18	22				FALSE	100	0.756377	5.21588	1.52889e-16	3.84524e-16	24.2138	35.2448	23.6813	305.754	51.4491	59.9823	42.7276	41.6932	18.4092	32.9193	33.2813	26.0608	26.4343	28.2938	35.3997	36.8662	44.084	22.355	31.5345	44.2251	41.5098	37.962	89	34.3304	23.7909	32.2735	74.9474	42.5023	38.8707	25.0494	37.0722	24.2964	39.2847	36.4985
A0A286ZWQ0	A0A286ZWQ0	NCF2	Sus scrofa	Neutrophil cytosolic factor 2	1	1	NADPH oxidase complex	phagocytosis,positive regulation of catalytic activity,respiratory burst	superoxide-generating NADPH oxidase activator activity	FALSE	92	0.270218	9.17628	1.88097e-06	3.32201e-06	626.09	771.414	624.557	783.434	695.764	761.381	657.042	412.101	376.159	577.217	671.284	431.528	571.306	759.19	NaN	598.575	538.501	684.942	623.864	440.055	772.79	NaN	545.228	702.967	542.77	541.094	676.844	805.549	NaN	495.908	380.693	615.434	722.221	705.821
A0A286ZWQ1	A0A286ZWQ1	LTBP1	Sus scrofa	Latent transforming growth factor beta binding protein 1	5	5			calcium ion binding	TRUE	92.9	0.323844	3.91562	4.55965e-12	7.22902e-12	NaN	12.7481	26.564	10.2125	17.5486	9.10114	8.44028	21.521	15.4778	11.8088	11.9456	21.6225	NaN	21.7093	19.5598	18.769	10.1166	14.0727	14.6727	18.5758	14.982	12.3145	NaN	22.0863	18.0225	17.9105	16.5096	25.8215	NaN	16.8052	14.8675	25.9627	16.9511	NaN
A0A286ZWS0	A0A286ZWS0	SH3BGRL3	Sus scrofa	SH3 domain-binding glutamic acid-rich-like protein	2	2	cell	electron transport chain,cell redox homeostasis	electron carrier activity,protein disulfide oxidoreductase activity	TRUE	69.6	0.912643	3.67211	8.21542e-11	1.4429e-10	3.02394	12.8799	NaN	91.5276	14.152	17.1326	15.8587	NaN	10.9719	7.50153	11.685	NaN	NaN	12.1035	7.67642	7.6853	5.51564	NaN	12.8649	12.5556	NaN	12.7217	77.4788	11.0547	11.22	14.3511	30.8284	NaN	9.35399	12.2612	16.5455	NaN	6.83816	NaN
A0A286ZX26;CATD_HUMAN;P00795	A0A286ZX26;P00795	CTSD;CTSD	Sus scrofa	Cathepsin D	1	1	lysosome;;extracellular space,lysosome,melanosome	proteolysis;;proteolysis,autophagy,protein catabolic process	aspartic-type endopeptidase activity;;aspartic-type endopeptidase activity	FALSE	85.7	0.294297	5.26629	1.93136e-10	3.50229e-10	27.8694	41.1053	NaN	35.7582	57.4302	NaN	28.0132	49.8181	55.6955	52.5985	40.5287	NaN	35.2022	32.0472	32.2329	35.5257	46.2396	54.0248	33.5312	39.558	33.5479	24.2107	28.1855	25.6724	23.2519	NaN	48.6058	NaN	52.0446	20.0145	24.1054	35.9152	54.2216	44.0966
A0A286ZYV7	A0A286ZYV7	PKLR	Sus scrofa	Pyruvate kinase	2	2		glycolytic process	magnesium ion binding,pyruvate kinase activity,kinase activity,potassium ion binding	FALSE	41.1	0.987666	4.85948	9.9457e-06	1.69595e-05	17.4327	NaN	18.7792	197.015	18.9723	NaN	42.5968	13.3574	NaN	NaN	19.9183	NaN	NaN	NaN	38.3989	NaN	28.1314	NaN	NaN	NaN	NaN	NaN	NaN	NaN	NaN	26.8876	NaN	17.4021	NaN	167.4	20.6234	41.6157	32.9609	32.1177
A0A286ZYZ5	A0A286ZYZ5	LOC106504547	Sus scrofa	Serpin domain-containing protein	16	36				FALSE	100	0.387208	11.7924	8.59629e-16	1.79164e-15	2907.88	2603.09	10340.3	1804.82	6741.83	2468.89	3471.09	5370.69	5575.79	3938.83	3479.65	4354.98	5084.24	5243.93	3401.81	3931.28	3818.92	2880.52	2473.29	3277.47	3441	3279.42	2541.23	5353.52	3910.28	1996.87	1724.5	3283.35	4156.49	3420.16	9102.5	3602.86	3774.07	3977.34
A0A287A021	A0A287A021	NUTF2	Sus scrofa	Nuclear transport factor 2	1	2				FALSE	9.8	1.09448	3.4984	1.01914e-05	1.73684e-05	NaN	NaN	NaN	65.9929	NaN	NaN	NaN	NaN	NaN	NaN	NaN	NaN	NaN	NaN	NaN	NaN	NaN	NaN	NaN	NaN	NaN	NaN	15.3406	NaN	NaN	NaN	6.62273	NaN	NaN	NaN	NaN	NaN	9.80749	NaN
A0A287A042	A0A287A042	MGAM	Sus scrofa	Maltase-glucoamylase	81	148	integral component of membrane	carbohydrate metabolic process	hydrolase activity, hydrolyzing O-glycosyl compounds,carbohydrate binding	FALSE	100	0.249747	9.18523	1.77464e-17	5.98128e-17	591.276	351.237	457.606	656.472	720.044	620.235	588.947	438.145	454.237	533.597	600.84	506.997	586.487	606.453	586.565	512.292	605.267	643.365	494.229	600.507	623.719	592.356	788.256	272.914	322.545	526.155	580.555	474.584	749.556	511.747	662.484	458.007	587.216	286.625
A0A287A0E9	A0A287A0E9	CLCA1	Sus scrofa	Calcium-activated chloride channel regulator 1	5	5		chloride transport,ion transmembrane transport	intracellular calcium activated chloride channel activity	FALSE	88.4	0.330075	4.23733	4.10753e-11	7.02148e-11	11.6983	20.7348	16.2515	NaN	18.8612	9.63715	14.4367	16.3159	10.831	28.1445	18.4559	35.9437	NaN	11.4106	21.9144	9.54685	19.9561	19.6071	17.4068	30.1004	18.801	17.9935	10.6066	9.71737	30.0858	26.6621	18.6632	15.2079	15.03	NaN	15.4521	30.917	20.1971	NaN
A0A287A0M2	A0A287A0M2	ARSG	Sus scrofa	Arylsulfatase G	8	9		metabolic process	sulfuric ester hydrolase activity	FALSE	100	0.254735	6.0214	1.77464e-17	5.98128e-17	62.7144	89.2859	101.869	72.3894	63.4822	52.2788	72.2677	55.245	50.154	62.9654	72.434	68.8199	80.3356	37.0675	63.1447	88.3214	56.8764	66.3034	58.8389	69.1886	65.0684	67.4824	57.8977	87.2339	36.4128	49.9137	118.519	63.5416	45.4861	71.3626	64.5132	53.6538	68.0031	63.3524
A0A287A0R9	A0A287A0R9	BEST3	Sus scrofa	Bestrophin	1	1				FALSE	72.3	0.332745	5.92169	4.80655e-05	7.84615e-05	NaN	35.6342	25.6952	59.9583	58.575	NaN	111.392	36.7662	NaN	25.4463	68.5488	NaN	60.2753	29.6561	71.049	59.3538	62.6437	78.1386	60.8465	NaN	80.9555	64.0965	89.7364	NaN	NaN	72.3307	52.6641	69.0666	43.0486	109.745	127.354	NaN	59.5474	92.1249
A0A287A1G4	A0A287A1G4	PDLIM5	Sus scrofa	PDZ and LIM domain 5	1	1				TRUE	53.6	0.621383	3.93953	2.80135e-07	5.1406e-07	NaN	29.9652	NaN	40.4917	NaN	5.0342	13.5048	18.5187	10.8068	NaN	14.6386	NaN	NaN	6.75875	NaN	NaN	22.191	22.8155	NaN	8.69403	NaN	NaN	61.5149	NaN	5.82689	NaN	12.7861	NaN	20.0859	12.9714	44.0012	NaN	32.0338	10.077
A0A287A1M9	A0A287A1M9	ARF4	Sus scrofa	ADP-ribosylation factor	1	1				FALSE	44.6	0.811248	3.26526	9.87748e-10	1.87829e-09	NaN	10.9467	NaN	50.5883	12.9234	NaN	NaN	23.5689	NaN	17.1594	8.97388	NaN	NaN	NaN	NaN	NaN	NaN	NaN	7.1427	NaN	3.12694	NaN	32.1689	NaN	7.19481	7.48416	11.6487	NaN	8.21639	NaN	23.7419	NaN	20.2401	NaN
A0A287A1S6	A0A287A1S6	COL1A1	Sus scrofa	Collagen alpha-1(I) chain preproprotein	17	23			extracellular matrix structural constituent	FALSE	100	0.233457	6.27945	1.93239e-17	6.43039e-17	77.8107	78.1116	88.8422	79.8747	62.2692	77.199	84.7556	95.7691	66.4761	54.7447	93.0538	51.1429	71.0305	68.9882	75.7723	84.0449	80.8549	62.1161	124.667	76.4369	76.9437	68.9583	67.5491	100.399	92.3317	102.369	111.461	93.572	57.4877	81.005	37.5711	74.7419	86.3126	69.1063
A0A287A1Z0	A0A287A1Z0	PSMB8	Sus scrofa	Proteasome subunit beta	1	1	nucleus,cytoplasm,proteasome core complex	proteolysis involved in cellular protein catabolic process	threonine-type endopeptidase activity	FALSE	90.2	0.317747	4.88947	8.20184e-09	1.58911e-08	37.5903	29.2859	31.3468	50.0007	25.0399	65.7969	35.1302	48.9408	43.111	26.9153	32.427	NaN	46.301	29.0662	32.112	23.3393	25.6143	27.8917	35.6969	18.36	51.2139	21.3228	34.9612	31.5863	49.9317	16.6818	17.2739	27.5397	27.2545	30.1971	24.5999	49.2052	19.597	13.1656
A0A287A2Q7	A0A287A2Q7	COL2A1	Sus scrofa	Collagen type II alpha 1 chain	2	2				TRUE	83	0.412427	4.28571	1.20183e-07	2.24403e-07	21.8131	32.4176	28.8453	27.3864	12.9279	18.8904	36.2406	27.2346	28.9521	NaN	29.4433	32.3189	NaN	23.338	26.6902	NaN	9.48677	36.0764	23.2642	14.3869	27.6553	24.8226	24.4303	41.2249	24.7616	11.5865	24.8187	31.4821	15.7723	15.944	NaN	11.0819	15.9145	23.3312
A0A287A2R9	A0A287A2R9	YWHAE	Sus scrofa	Tyrosine 3-monooxygenase/tryptophan 5-monooxygenase activation protein epsilon	6	6			protein domain specific binding	TRUE	93.8	0.39673	4.04322	5.46503e-12	8.70745e-12	11.4302	17.0787	NaN	67.4296	17.0808	20.3355	14.9057	12.5591	NaN	15.8608	11.8751	17.1311	26.8091	18.2186	12.8116	20.9682	12.6855	8.73188	18.938	11.7887	20.3934	9.5974	26.5775	17.4122	15.1367	14.8452	19.6387	16.5656	13.6236	14.8119	11.8737	17.3661	16.8426	26.7152
A0A287A5G2	A0A287A5G2	PAM	Sus scrofa	Peptidylglycine alpha-amidating monooxygenase	2	2				FALSE	69.6	0.318796	4.58691	5.89583e-07	1.06555e-06	NaN	37.4045	26.4939	40.1372	NaN	NaN	NaN	28.0178	29.7496	35.1602	NaN	25.7459	NaN	22.9151	14.1951	35.3772	29.454	17.0946	NaN	14.9209	33.7452	28.7497	32.8159	32.074	18.4751	26.0166	NaN	19.0808	NaN	37.1324	19.5465	12.7864	NaN	NaN
A0A287A5Z1	A0A287A5Z1	LOC102165847	Sus scrofa	Zinc finger protein 664-like	1	1			nucleic acid binding	FALSE	22.3	0.607669	3.69904	0.000705377	0.00102604	NaN	NaN	21.2877	NaN	NaN	NaN	21.2973	11.5132	5.1184	NaN	15.2614	10.3024	NaN	NaN	NaN	NaN	NaN	NaN	NaN	19.7297	NaN	6.8274	NaN	NaN	NaN	NaN	8.38637	NaN	NaN	9.58369	NaN	NaN	5.75881	NaN
A0A287A6K7	A0A287A6K7	APMAP	Sus scrofa	Adipocyte plasma membrane-associated protein	13	15		biosynthetic process	strictosidine synthase activity	FALSE	100	0.159023	6.18685	2.31608e-17	7.50327e-17	86.2133	87.1703	80.7214	77.0864	61.8594	73.125	72.7899	72.5807	86.5048	79.7294	69.7519	107.767	81.9356	75.0458	57.5488	87.5104	71.0103	74.8212	45.5477	73.1891	76.1867	77.2615	71.7297	82.855	71.4805	83.9544	93.0059	68.551	79.5582	53.2995	58.1531	82.3632	69.2298	66.7433
A0A287A6P1	A0A287A6P1	GSN	Sus scrofa	Gelsolin	51	107				FALSE	100	0.064967	10.5499	1.77464e-17	5.98128e-17	1382.66	1747.2	1385.04	1298.46	1509.83	1496.9	1492.33	1543.11	1299.52	1566.9	1468.3	1388.69	1562.8	1333.38	1504.68	1624.6	1429.51	1460.28	1407.07	1508.02	1454.13	1520.57	1635.45	1581.45	1528.03	1516.44	1583.21	1591.72	1399.86	1545.35	1637.44	1535.99	1453.14	1604.78
A0A287A6Q0	A0A287A6Q0	PROS1	Sus scrofa	Protein S	27	49	extracellular region	negative regulation of blood coagulation	calcium ion binding	FALSE	100	0.0741215	9.63964	6.49896e-16	1.39229e-15	856.498	712.577	1034.89	861.441	669.286	787.174	814.612	822.302	797.469	685.013	800.479	889.767	796.038	755.228	785.23	880.495	764.358	794.651	792.975	751.364	808.96	780.144	828.551	814.189	762.635	732.383	880.848	785.027	713.197	772.701	761.65	822.799	802.255	740.236
A0A287A703	A0A287A703		Sus scrofa	Enoyl reductase (ER) domain-containing protein	5	5		oxidation-reduction process	zinc ion binding,oxidoreductase activity	FALSE	7.1	0.809614	4.22977	3.80644e-08	7.25936e-08	NaN	NaN	NaN	NaN	NaN	14.1247	NaN	NaN	NaN	NaN	NaN	NaN	NaN	NaN	NaN	NaN	13.6835	NaN	NaN	NaN	NaN	NaN	NaN	NaN	NaN	NaN	15.0298	NaN	NaN	NaN	NaN	NaN	NaN	NaN
A0A287A718	A0A287A718	CP	Sus scrofa	Ceruloplasmin	84	233				FALSE	100	0.0903363	12.6719	1.77464e-17	5.98128e-17	7197.56	5412.66	8050.54	6518.98	7520.15	7341.37	6561.96	5966.1	5312.35	7485.15	6436.86	6979.95	6784.51	6813.79	6494.3	5836.07	6268.16	6264.7	5610.13	6405.73	6502.72	6370.11	6433.89	6033.83	7869.62	7061.7	6511.28	6634.06	6715.86	7372.19	8959.95	8282.86	6457.32	6461.8
A0A287A7L8	A0A287A7L8	PTPRF	Sus scrofa	protein-tyrosine-phosphatase	1	1				FALSE	25	0.595315	2.03677	5.62927e-05	9.14126e-05	NaN	NaN	NaN	NaN	NaN	NaN	2.74591	2.14441	NaN	3.61896	NaN	3.1602	NaN	NaN	NaN	3.74172	NaN	NaN	NaN	5.56047	NaN	NaN	NaN	12.5631	7.54983	NaN	NaN	NaN	7.78794	3.41913	NaN	NaN	1.96722	NaN
A0A287A7Q7	A0A287A7Q7	EIF5	Sus scrofa	Eukaryotic translation initiation factor 5	1	1		translational initiation	translation initiation factor activity	FALSE	3.6	1.13861	3.9907	1.00343e-08	1.94243e-08	NaN	NaN	NaN	66.1646	NaN	NaN	NaN	NaN	NaN	NaN	NaN	NaN	NaN	NaN	NaN	NaN	NaN	NaN	NaN	NaN	NaN	NaN	NaN	NaN	NaN	NaN	NaN	NaN	NaN	NaN	NaN	NaN	NaN	NaN
A0A287A8J7	A0A287A8J7	RRM1	Sus scrofa	Ribonucleoside-diphosphate reductase	1	1		DNA replication,oxidation-reduction process	ribonucleoside-diphosphate reductase activity, thioredoxin disulfide as acceptor,ATP binding	FALSE	75	0.52668	4.45474	3.14799e-05	5.20686e-05	25.7617	24.5774	23.2442	26.6237	8.98297	28.8888	NaN	16.556	47.7796	6.58621	5.03891	29.0218	45.6754	22.5464	NaN	29.3423	37.9184	19.2306	NaN	34.3103	13.9582	NaN	15.9375	16.7584	NaN	NaN	20.6124	20.272	7.47724	13.8957	49.5857	52.9204	39.3257	12.6586
A0A287AA42	A0A287AA42		Sus scrofa	Ig-like domain-containing protein	4	8				FALSE	100	0.300267	10.7379	5.96363e-14	9.47164e-14	1973.93	1710.43	740.694	855.731	977.362	2075	1768.66	2091.77	1756.7	1321.88	1656.6	3032.62	2639.88	1377.41	1772.05	817.665	1629.61	1071.71	1728.89	1731.99	1661.06	1764.47	1563.27	2021.51	1961.7	2494.64	1355.99	2079	1990.83	1388.63	1070.99	2266.53	1703.76	3192.94
A0A287AAI1	A0A287AAI1	CLEC11A	Sus scrofa	C-type lectin domain containing 11A	9	11				FALSE	100	0.181189	5.99181	6.19818e-14	9.83235e-14	81.9521	74.3387	64.9766	72.0611	42.04	94.0918	59.3499	72.8056	79.334	54.5826	61.4592	70.6652	77.7962	67.801	64.8777	71.5898	59.8946	58.2124	93.3452	66.3522	61.7833	63.8076	83.768	87.2437	55.7269	48.2432	75.9848	61.3054	69.0375	65.4747	49.1112	53.0436	63.4254	59.7034
A0A287AAX8	A0A287AAX8	CC2D1A	Sus scrofa	Coiled-coil and C2 domain containing 1A	1	1				FALSE	69.6	0.630105	7.74074	0.000186127	0.000288846	206.507	254.887	NaN	48.2952	NaN	350.611	282.211	255.069	198.237	230.945	137.987	155.59	150.333	106.098	206.163	349.37	NaN	807.276	NaN	176.764	114.715	160.942	193.965	453.834	186.714	NaN	NaN	312.207	200.159	NaN	NaN	184.05	374.495	256.69
A0A287AAZ9	A0A287AAZ9	CFB	Sus scrofa	Complement C2	50	110				FALSE	100	0.084315	11.919	1.93654e-16	4.73486e-16	3984	3603.54	4538.85	3699.82	3833.23	3876.85	3782.03	3667.27	4282.51	3851.68	3738.46	3632.71	4051.65	4062.39	3780.46	4006.02	3859.79	3819.48	3509.48	3784.17	3788.21	3770.71	3682.92	3654.89	4573.77	4269.17	3516.38	3634.01	3185.29	3401.25	4414.56	4553.03	3836.68	3557.92
A0A287AB52	A0A287AB52	MFAP4	Sus scrofa	Microfibril associated protein 4	3	4				FALSE	100	0.246631	5.33598	6.05553e-15	1.07615e-14	33.443	47.5922	41.4129	46.7919	32.8637	26.5867	42.2535	52.368	37.476	50.2709	38.0244	49.2816	43.7844	32.2211	27.7715	34.7556	33.9371	42.9178	63.5897	36.7141	56.2049	32.7508	29.0954	66.1348	55.9205	46.9727	49.8454	56.739	40.9279	22.9323	33.6338	36.2663	37.407	46.8111
A0A287AB58	A0A287AB58	ISG15	Sus scrofa	ISG15 ubiquitin like modifier	5	5				FALSE	48.2	1.78608	4.29479	3.87869e-09	7.5105e-09	NaN	NaN	NaN	393.86	10.1359	NaN	16.2118	13.9253	7.69209	NaN	19.3084	NaN	NaN	NaN	11.3932	17.057	21.9063	NaN	NaN	18.5888	17.9674	36.7354	39.8965	NaN	NaN	NaN	13.9392	NaN	NaN	8.64455	18.597	NaN	18.0963	9.63012
A0A287ABN4	A0A287ABN4	TNIP1	Sus scrofa	TNFAIP3 interacting protein 1	2	2				FALSE	81.2	0.335446	4.66801	7.34248e-05	0.000118144	25.8674	10.964	29.744	8.73231	NaN	14.6893	38.1719	32.3827	43.63	NaN	26.0794	27.4566	27.594	33.1213	29.9527	24.0447	NaN	NaN	23.0911	22.1863	30.7137	26.1259	24.0503	36.0923	NaN	17.9781	46.6249	38.6481	33.2565	39.5069	20.907	NaN	30.6448	NaN
A0A287ADE7;A0A287AWH3;A0A287B1Y4	A0A287ADE7;A0A287AWH3;A0A287B1Y4		Sus scrofa	Ig-like domain-containing protein	2	3	;;	;;	;;	FALSE	100	0.531728	7.2388	3.16865e-11	5.36233e-11	204.165	127.722	43.8668	53.9737	112.145	150.768	169.61	254.085	141.545	117.27	141.946	238.496	318.333	82.1715	222.047	34.2521	150.98	100.241	121.833	186.93	146.912	148.152	185.52	112.703	94.792	277.382	123.444	126.859	138.336	90.4329	47.4449	188.728	156.813	93.9713
A0A287ADL4	A0A287ADL4	PIGR	Sus scrofa	Polymeric immunoglobulin receptor	11	14	integral component of membrane			FALSE	100	0.205129	5.48901	1.962e-14	3.25793e-14	62.5131	37.5914	34.4514	49.083	33.4908	70.2825	45.6462	45.1041	50.5114	60.543	48.0124	56.1863	53.1273	38.3751	41.5712	35.6324	47.6262	29.579	33.1232	42.0791	50.5767	44.7838	31.2745	39.3059	52.8948	45.9087	26.7788	47.2162	35.1458	43.5417	58.9503	36.6602	44.8345	52.3237
A0A287AE51	A0A287AE51		Sus scrofa	Ig-like domain-containing protein	3	9				FALSE	100	0.494451	8.46338	5.20855e-14	8.30886e-14	174.477	184.867	194.696	362.61	279.289	164.457	374.803	635.183	228.777	324.942	327.197	310.501	800.788	170.522	401.134	158.714	373.795	141.446	263.492	345.484	366.866	374.606	668.387	159.568	221.069	479.418	533.291	320.674	200.992	444.834	244.646	253.992	336.354	362.497
A0A287AE63;NEDD8_HUMAN	A0A287AE63	NEDD8	Sus scrofa;	NEDD8	1	1	;	;	;	FALSE	0.9	NaN	3.99142	0.000550664	0.000811818	NaN	NaN	NaN	15.9052	NaN	NaN	NaN	NaN	NaN	NaN	NaN	NaN	NaN	NaN	NaN	NaN	NaN	NaN	NaN	NaN	NaN	NaN	NaN	NaN	NaN	NaN	NaN	NaN	NaN	NaN	NaN	NaN	NaN	NaN
A0A287AEA5	A0A287AEA5	ALDH16A1	Sus scrofa	Aldehyde dehydrogenase 16 family member A1	2	2				FALSE	3.6	1.09121	3.69702	5.49825e-10	1.03073e-09	NaN	NaN	NaN	55.3918	NaN	NaN	NaN	NaN	NaN	NaN	NaN	NaN	NaN	NaN	NaN	NaN	NaN	NaN	NaN	NaN	NaN	NaN	NaN	NaN	NaN	NaN	3.39936	NaN	NaN	NaN	NaN	NaN	NaN	NaN
A0A287AEQ0	A0A287AEQ0	PTMA	Sus scrofa	Prothymosin alpha	1	1				FALSE	46.4	0.980223	5.16108	1.40277e-08	2.70907e-08	11.6447	NaN	NaN	131.078	30.3437	22.8053	NaN	NaN	57.346	NaN	NaN	NaN	NaN	19.8858	14.8552	NaN	18.884	NaN	26.752	187.724	NaN	141.628	35.2109	NaN	NaN	NaN	189.024	NaN	21.8507	NaN	12.0805	NaN	159.308	49.756
A0A287AFE3	A0A287AFE3	LOC110258312	Sus scrofa	Complement C1q and tumor necrosis factor-related protein 9A	5	11				FALSE	100	0.113654	8.17131	1.35152e-15	2.70087e-15	280.468	276.681	304.327	277.265	262.724	254.272	265.797	308.963	298.432	296.743	280.228	325.135	302.095	252.958	287.291	298.124	283.533	317.488	332.904	296.178	313.062	286.412	196.379	276.055	267.187	353.975	338.057	279.549	295.119	292.532	281.227	268.625	279.471	261.866
A0A287AFQ4	A0A287AFQ4	C8G	Sus scrofa	Complement C8 gamma chain	9	16			small molecule binding	FALSE	100	0.139892	9.78697	2.27585e-17	7.39194e-17	856.223	644.458	714.358	1110	864.196	823.741	926.754	850.083	934.586	694.802	885.6	710.523	742.39	876.007	848.04	782.926	930.635	961.317	1027.59	841.311	940.714	876.31	1271.41	623.622	934.223	877.558	870.124	923.659	790.131	989.583	788.509	969.257	888.226	1046.64
A0A287AG13	A0A287AG13	APOB	Sus scrofa	Apolipoprotein B	276	582		lipid transport	lipid transporter activity	FALSE	100	0.117474	10.3386	1.77464e-17	5.98128e-17	1278.94	1260.04	1186.43	1479.27	1679.37	1257.85	1282.56	1447.58	988.873	1213.37	1299.05	1632.93	1091.76	1238.55	1271.6	1319.08	1273.79	1155.48	1264.94	1246.31	1270.29	1263.57	742.961	1227.11	1236.02	1277.68	1445.01	1459.7	1174.3	1504.31	1272.62	1356.43	1273.13	1247.4
A0A287AG48;A0A287ARG4	A0A287AG48;A0A287ARG4	KRT7;KRT8	Sus scrofa	Keratin 7;Keratin 8	1	1	keratin filament;	;	structural molecule activity;	FALSE	31.2	0.684385	3.7125	1.74639e-06	3.08884e-06	NaN	NaN	NaN	NaN	2.37363	10.0554	13.8342	15.5906	NaN	NaN	11.2925	NaN	NaN	NaN	10.8795	19.363	NaN	18.1459	NaN	NaN	NaN	NaN	NaN	NaN	NaN	NaN	NaN	NaN	13.3947	22.9993	NaN	NaN	NaN	NaN
A0A287AHI6	A0A287AHI6	TRAPPC10	Sus scrofa	Trafficking protein particle complex subunit 10	1	1				FALSE	8	2.42407	3.84085	0.000109818	0.000174096	NaN	NaN	NaN	NaN	NaN	NaN	NaN	NaN	NaN	NaN	NaN	NaN	NaN	NaN	17.1453	NaN	NaN	NaN	NaN	NaN	13.5564	NaN	NaN	NaN	NaN	NaN	NaN	NaN	NaN	NaN	NaN	NaN	NaN	NaN
A0A287AHI7	A0A287AHI7	ADIPOQ	Sus scrofa	Adiponectin, C1Q and collagen domain containing	11	17	extracellular region,collagen trimer			FALSE	100	0.159293	10.6767	4.70128e-16	1.04124e-15	1463.41	1917.58	1741.57	1755.44	1870.66	1410.68	1529.5	1508.17	1663.65	1497.2	1624.23	1204.05	1663.22	1589.8	1734.62	2139.78	1687.68	1517.77	1851.96	1491.77	1576.71	1586.61	2345.04	1602.69	1452.03	2004.51	1828.77	2001.29	1549.56	1245.95	1946.67	2045.71	1657.18	1236.11
A0A287AHK1	A0A287AHK1	GC	Sus scrofa	Vitamin D-binding protein	40	104				FALSE	100	0.0740771	12.5907	1.77464e-17	5.98128e-17	6383.62	6130.37	5296.47	5687.82	6056.4	6284.21	6038.52	6148.35	6927.29	5492.55	5844.19	6345.18	6180.3	5684.14	5939.95	6818.83	6259.98	6594.68	6063.37	6131.62	5943.35	6232.9	7384.66	5633.66	5900.47	5330.72	6123.99	7221.44	7399.5	6454.07	5869.57	5758.04	5949.33	6384.41
A0A287AHQ0	A0A287AHQ0	ACAT2	Sus scrofa	Acetyl-CoA acetyltransferase 2	2	2				FALSE	48.2	0.526927	3.3904	9.97991e-07	1.78475e-06	NaN	23.5888	NaN	22.5141	23.6863	NaN	NaN	9.24861	10.2728	12.4476	13.2832	NaN	NaN	6.60276	10.3738	9.13581	4.01791	NaN	7.09516	8.15139	NaN	NaN	9.24718	16.9727	21.8442	21.4721	19.7001	NaN	NaN	NaN	NaN	11.5281	NaN	NaN
A0A287AI92	A0A287AI92	CA1	Sus scrofa	Carbonic anhydrase	16	34	cytoplasm	one-carbon metabolic process	carbonate dehydratase activity,zinc ion binding	FALSE	97.3	1.90955	6.28836	6.59222e-15	1.16496e-14	20.5192	100.419	15.4509	2447.54	160.478	186.259	160.015	86.8993	31.0086	49.8267	155.311	26.6206	NaN	33.1029	150.337	69.6001	160.099	38.681	33.0501	142.221	163.655	161.284	742.985	28.4801	22.0179	82.2138	305.549	45.1732	152.716	70.825	295.191	NaN	159.025	41.7807
A0A287AIJ3	A0A287AIJ3	GPX3	Sus scrofa	Glutathione peroxidase 3	9	17		response to oxidative stress,oxidation-reduction process,cellular oxidant detoxification	glutathione peroxidase activity	FALSE	100	0.128488	9.01543	2.30076e-14	3.7917e-14	539.174	650.855	446.609	483.882	581.112	508.065	516.733	449.981	698.234	496.295	480.613	639.068	548.797	580.643	553.374	558.499	501.507	521.632	467.727	525.5	534.157	516.03	637.298	560.242	500.543	560.824	620.716	424.686	560.085	432.582	539.237	532.631	505.677	398.19
A0A287AIM8	A0A287AIM8	C5	Sus scrofa	Complement C5	91	171	extracellular space	inflammatory response,complement activation,negative regulation of endopeptidase activity	endopeptidase inhibitor activity	FALSE	100	0.104342	9.15567	1.77464e-17	5.98128e-17	642.167	640.552	692.447	570.003	538	602.412	580.708	518.021	600.036	608.708	575.309	622.955	674.159	569.11	572.982	625.729	562.478	503.478	495.141	552.063	579.569	561.865	478.145	632.528	631.505	663.506	559.579	619.157	482.545	562.145	565.31	755.36	560.952	561.581
A0A287AJ08	A0A287AJ08	ETV7	Sus scrofa	ETS variant transcription factor 7	1	1	nucleus	regulation of transcription, DNA-templated	transcription factor activity, sequence-specific DNA binding,sequence-specific DNA binding	FALSE	24.1	0.280481	5.24431	0.000244428	0.000374842	NaN	NaN	NaN	NaN	39.1536	NaN	NaN	NaN	NaN	NaN	27.4314	NaN	NaN	44.5089	NaN	54.0246	NaN	NaN	NaN	NaN	43.8075	NaN	NaN	NaN	NaN	NaN	68.5215	NaN	NaN	32.4716	NaN	NaN	25.1286	NaN
A0A287AJ51	A0A287AJ51	AGT	Sus scrofa	Angiotensinogen	27	59				FALSE	100	0.148274	10.2369	7.74628e-16	1.63088e-15	1443.41	1301.94	1263.5	1222.73	1618.35	1681.15	1147.92	1147.65	928.171	971.522	1243.11	1152.15	1035.08	1469.57	1184.12	1235.96	1243.62	1292.71	1340.65	1191.14	1181.22	1154.36	1181.82	1264.88	1506.19	1362.96	876.524	1442.84	1104.68	1234.8	1015.22	1437.96	1192.28	1099.89
A0A287AJQ2	A0A287AJQ2	PGAM1	Sus scrofa	Phosphoglycerate mutase	6	8				FALSE	100	0.178864	5.68288	4.55247e-14	7.29614e-14	55.6546	54.2059	47.174	81.4695	61.6651	70.5598	47.3919	58.6466	46.9766	57.6846	55.1718	44.0238	54.9498	66.2944	48.171	46.4883	51.1358	43.108	68.803	38.8992	51.1198	54.3164	62.1124	59.8638	61.0143	47.7822	48.4989	54.9494	54.1421	56.5548	39.6414	56.6623	53.42	64.9478
A0A287AJS8;A0A8W4F753;A0A8W4FKP8;F1RTG6	A0A287AJS8;A0A8W4F753;A0A8W4FKP8;F1RTG6	;;;SLA-6	Sus scrofa	Ig-like domain-containing protein	2	2	;;;	;;;	;;;	FALSE	95.5	0.34746	5.14984	2.40305e-13	3.70724e-13	47.9645	NaN	45.8436	52.8023	42.6461	59.1179	30.012	30.0737	20.388	27.2851	46.1554	21.5149	26.0138	60.6706	44.6187	25.5406	40.9941	64.693	21.9731	41.9976	36.2094	35.1875	41.4542	28.9798	28.3615	NaN	43.1008	52.6055	69.0766	51.5543	25.8213	21.579	39.7678	55.8678
A0A287AJU1	A0A287AJU1	COTL1	Sus scrofa	Coactosin like F-actin binding protein 1	4	4	intracellular		actin binding	FALSE	92	0.64711	4.46914	4.9088e-13	7.54428e-13	15.9896	39.9024	12.4495	94.1124	34.6862	12.8209	20.4994	20.7111	23.5991	19.2613	21.8063	20.4026	9.29509	24.7226	21.5335	16.7556	26.9663	8.92536	19.0434	25.895	29.115	23.6831	98.4437	12.6053	20.1975	26.4797	18.3124	15.6879	33.6388	17.8822	91.5616	14.4585	18.278	13.4366
A0A287AK19;P26042	A0A287AK19;P26042	MSN	Sus scrofa	Moesin	2	2	cytoskeleton;cytoplasm,cytoskeleton,microvillus,apical plasma membrane,microvillus membrane,invadopodium	;immunological synapse formation,T cell proliferation,T cell aggregation,T cell migration	actin binding;actin binding	FALSE	50.9	0.572758	4.68014	5.89444e-05	9.55701e-05	NaN	49.386	21.7902	116.02	35.7427	51.2784	NaN	28.0348	17.4866	NaN	36.4417	NaN	NaN	NaN	NaN	23.7787	32.3417	9.39699	NaN	32.781	NaN	37.8308	47.8211	NaN	NaN	15.3613	NaN	NaN	17.7804	22.551	20.7334	16.8335	29.3624	39.5938
A0A287AK21	A0A287AK21	TAGLN2	Sus scrofa	Transgelin	11	15				FALSE	99.1	0.596221	5.25047	3.46225e-17	1.05847e-16	29.422	70.9295	26.6481	142.845	57.6648	31.7885	43.7499	38.409	32.3724	56.1043	40.0137	35.2194	22.7149	38.6412	46.8548	27.727	40.0709	26.336	33.6943	39.5412	46.3797	40.6416	171.766	21.4906	39.6853	37.7129	46.4215	25.9836	49.4998	23.5098	113.74	31.1623	39.2085	40.3178
A0A287AKL0;F1S9C0;P0DSO0	A0A287AKL0;F1S9C0;P0DSO0	;;SAA2	Sus scrofa	Serum amyloid A protein;Serum amyloid A protein;Serum amyloid A-2 protein	4	4	high-density lipoprotein particle;;	acute-phase response;;	;;	FALSE	84.8	0.768754	4.62509	8.80225e-16	1.8304e-15	NaN	9.95735	30.4723	39.7743	44.1641	30.3768	28.057	12.4164	29.8204	65.1649	32.5102	10.8071	16.8964	28.7427	35.4565	16.4995	25.8211	23.6152	9.82362	27.0538	24.3347	21.355	NaN	26.1827	11.5416	NaN	30.3764	NaN	NaN	3.7652	16.4306	19.1248	23.3892	NaN
A0A287AKW2	A0A287AKW2		Sus scrofa	Ig-like domain-containing protein	3	8				FALSE	100	0.525443	10.2725	9.90774e-16	2.03724e-15	1380.07	2068.85	1265.84	917.733	1852.73	1432.77	1472.01	1032.03	744.482	633.176	1337.18	1221.34	1422.35	2306.83	1414.7	893.811	1625.9	1428.48	1816.61	1471.17	1390.45	1541.17	815.309	1910.7	1370.74	1098.96	441.633	1747.27	2312.7	1377.09	1346.9	1116.9	1504.48	3394.86
A0A287AKY5	A0A287AKY5	PDE11A	Sus scrofa	Phosphodiesterase	1	1		signal transduction	3',5'-cyclic-nucleotide phosphodiesterase activity,metal ion binding	FALSE	42.9	0.517566	4.14225	1.79633e-06	3.17541e-06	NaN	NaN	NaN	NaN	NaN	NaN	18.1391	9.50086	28.191	12.4905	18.3586	NaN	67.8571	NaN	16.6504	NaN	25.5725	NaN	NaN	19.5188	23.0917	33.8505	NaN	13.1793	NaN	15.5533	NaN	NaN	14.9029	NaN	NaN	12.0236	15.8912	NaN
A0A287AL89	A0A287AL89	FBLN1	Sus scrofa	Fibulin-1	19	31	proteinaceous extracellular matrix	positive regulation of peptidase activity,extracellular matrix organization	calcium ion binding,peptidase activator activity	FALSE	100	0.129415	8.50565	4.22425e-15	7.69754e-15	283.176	484.093	401.461	439.241	274.26	276.518	353.237	405.112	324.608	422.676	365.098	240.68	341.76	339.02	360.139	430.825	372.082	310.07	450.926	364.427	362.861	361.495	299.349	453.63	419.77	472.873	374.356	396.744	327.866	392.308	326.803	471.185	352.172	342.968
A0A287AL92	A0A287AL92	C4BPB	Sus scrofa	Complement component 4 binding protein beta	11	17				FALSE	100	0.118434	7.63917	2.75898e-17	8.7131e-17	209.292	170.68	314.233	233.504	171.599	208.081	202.529	198.257	213.263	185.157	191.051	226.277	230.983	174.768	192.386	245.248	209.419	207.023	207.031	194.052	209.861	197.653	212.91	187.358	169.851	165.892	256.327	161.311	162.402	186.257	201.85	214.414	191.408	168.409
A0A287ALC1	A0A287ALC1	IGHM	Sus scrofa	Immunoglobulin heavy constant mu	24	66				FALSE	100	0.217279	12.9316	1.77464e-17	5.98128e-17	7177.16	8104.91	6298.52	5487.35	7098.33	7059.76	7843.31	7267.29	5504.25	13248	8072.04	9698.51	8499.58	7155.71	7938.78	5844.01	7771.48	5435.87	8556.43	7867.6	7745.94	8018.61	7785.09	7351.37	7012.74	7377.46	9050.41	7585.98	8404.41	10857.9	12279.5	6711.88	7922.35	11425.1
A0A287ALJ6	A0A287ALJ6		Sus scrofa	Ig-like domain-containing protein	2	5				FALSE	100	0.784995	7.61712	1.77464e-17	5.98128e-17	79.012	157.277	166.758	337.203	109.14	77.2217	275.127	327.134	117.407	256.605	264.351	125.057	452.787	63.199	284.275	150.241	223.796	82.6118	176.616	270.714	257.329	247.012	315.935	177.733	159.533	215.763	497.171	48.3111	69.6894	513.797	538.863	154.563	223.901	1001.61
A0A287AMB0;A0A287B4E6;P61288	A0A287AMB0;A0A287B4E6;P61288	;TPT1;TPT1	Sus scrofa	TCTP domain-containing protein;Translationally-controlled tumor protein isoform 2;Translationally-controlled tumor protein	1	1	;;extracellular space,cytoplasm,multivesicular body,tubulin complex	;;cell differentiation	;;calcium ion binding,microtubule binding	FALSE	6.2	0.429582	4.88246	9.24193e-06	1.57865e-05	NaN	NaN	NaN	53.2624	NaN	25.7794	NaN	NaN	NaN	NaN	NaN	NaN	NaN	NaN	NaN	NaN	NaN	NaN	NaN	NaN	NaN	NaN	NaN	NaN	NaN	NaN	NaN	NaN	NaN	NaN	22.3335	NaN	NaN	NaN
A0A287ANF4	A0A287ANF4	TOGARAM1	Sus scrofa	TOG array regulator of axonemal microtubules 1	1	1				FALSE	84.8	0.482374	3.50611	1.88376e-05	3.16122e-05	14.9489	14.0361	19.1469	10.1398	16.1404	19.3307	17.9138	15.5637	15.1779	16.4342	NaN	22.5366	5.42932	18.9598	NaN	23.3345	8.15291	14.0902	12.767	17.8169	13.4738	11.4899	21.2021	NaN	12.1851	10.7333	8.49861	NaN	13.9999	10.2544	5.81626	11.4456	9.1399	NaN
A0A287ANU5	A0A287ANU5		Sus scrofa	Uncharacterized protein	1	2				FALSE	73.2	0.713468	9.19941	1.33627e-11	2.19039e-11	1614.91	1785.43	NaN	NaN	37.6655	1702.97	670.008	NaN	1097.89	66.0583	736.088	2139.95	NaN	1186.71	738.873	NaN	673.456	868.948	1133.68	688.708	689.875	678.697	NaN	1598.48	2006.63	2179.67	NaN	1257.87	2019.09	NaN	NaN	1880.04	732.767	NaN
A0A287ANV7	A0A287ANV7	LCP1	Sus scrofa	Lymphocyte cytosolic protein 1	27	32			actin binding,calcium ion binding	FALSE	100	0.12443	6.48462	4.25714e-17	1.26432e-16	92.8702	83.664	90.1793	95.4502	104.16	110.534	95.969	89.1765	87.2466	94.251	87.762	96.5863	82.359	83.6443	87.0696	89.0187	97.4692	92.1971	111.454	80.5482	102.293	80.974	93.8214	93.8065	90.6359	89.8531	79.2291	91.3688	97.0196	103.299	86.6779	76.628	92.8523	130.801
A0A287ANW0;A0A480K2S5	A0A287ANW0;A0A480K2S5	ACTA2;ACTG2	Sus scrofa	Actin alpha 2, smooth muscle;Actin gamma 2, smooth muscle	2	2	;	;	;	FALSE	61.6	0.437227	4.96152	4.28824e-05	7.02578e-05	NaN	NaN	21.5403	89.6209	35.7477	29.0379	24.3745	27.2817	NaN	45.1775	NaN	20.2104	34.6501	NaN	28.1522	27.9194	46.4061	31.8827	NaN	28.9094	24.942	NaN	42.0054	25.3256	NaN	29.8448	45.6995	NaN	40.7931	NaN	21.8233	17.6679	NaN	NaN
A0A287ANX9	A0A287ANX9		Sus scrofa	Ig-like domain-containing protein	12	23	integral component of membrane			FALSE	100	0.239194	12.8438	1.35657e-16	3.46199e-16	6278.76	6756.79	6782.11	5354.36	7716.79	6423.57	7453.28	6234.56	7191.84	10473.3	7672.57	6433.6	6251.9	7277.58	7674.63	5890.42	7566.47	4859.15	8189.71	7582.93	7602.9	7588.39	5734.18	6411.25	6453.02	7061.89	7153.68	6831.54	7466.16	10545.7	10207	5006.36	7607.05	11934.7
A0A287AP28	A0A287AP28		Sus scrofa	Ig-like domain-containing protein	2	3				FALSE	100	0.276099	8.8469	2.62873e-07	4.83017e-07	349.973	492.476	563.008	470.836	568.301	316.501	374.829	475.512	367.526	426.657	512.458	347.641	513.02	417.645	548.097	547.247	516.316	285.574	465.093	519.539	565.875	436.74	478.162	457.118	413.929	443.632	348.77	634.803	456.041	587.048	551.308	386.688	476.51	1128.34
A0A287AP71	A0A287AP71	EFEMP1	Sus scrofa	EGF containing fibulin extracellular matrix protein 1	14	15				FALSE	100	0.111743	6.50596	5.82857e-16	1.2625e-15	82.6537	106.858	75.9232	86.035	110.246	103.544	77.7098	73.4268	84.6294	89.7464	89.5612	84.0665	81.1153	86.4637	77.3395	78.6291	84.0337	104.224	93.0794	99.2175	80.1931	88.5913	80.7211	103.114	88.379	102.725	69.5377	108.636	101.872	96.925	92.8037	92.1735	86.3167	108.703
A0A287AP73	A0A287AP73	ITIH3	Sus scrofa	Inter-alpha-trypsin inhibitor heavy chain 3	37	83		negative regulation of endopeptidase activity,hyaluronan metabolic process	serine-type endopeptidase inhibitor activity	FALSE	100	0.309315	9.66226	1.77464e-17	5.98128e-17	460.361	983.669	1406.75	926.345	779.214	483.79	829.933	602.218	1121.63	738.054	839.39	776.452	387.222	1257.38	867.09	1545.48	859.608	889.997	750.154	854.668	865.553	818.575	470.386	926.751	448.712	395.272	939.341	1378.09	1401.61	1446.05	1205.77	404.754	806.743	997.541
A0A287APG4	A0A287APG4		Sus scrofa	Ig-like domain-containing protein	1	3				FALSE	100	0.661645	9.19121	2.53008e-11	4.24503e-11	311.302	455.117	658.58	1088.62	178.936	346.551	812.452	1650.07	403.409	990.282	749.015	727.839	581.509	218.475	696.85	834.364	786.595	282.881	637.495	745.775	773.989	704.893	963.987	426.054	514.467	621.795	693.18	303.796	341.57	1870.37	1180.49	542.875	728.153	2394.96
A0A287APN0	A0A287APN0	CSRP1	Sus scrofa	Cysteine and glycine rich protein 1	3	3				FALSE	24.1	0.640651	4.00526	1.91218e-05	3.20763e-05	NaN	17.0023	NaN	36.1296	18.2069	NaN	NaN	18.535	NaN	11.6637	9.01417	NaN	NaN	NaN	NaN	NaN	NaN	NaN	NaN	NaN	NaN	6.9829	48.7966	NaN	NaN	NaN	NaN	NaN	28.9661	NaN	40.6365	NaN	5.62931	NaN
A0A287APV2	A0A287APV2	MYO18A	Sus scrofa	Myosin XVIIIA	1	2				FALSE	99.1	0.194786	10.6677	4.83648e-06	8.38019e-06	2246.37	695.303	2096.16	1718.67	2098.45	1542.54	1494.29	1621.3	1689.55	1569.71	1571.23	1559.83	1593.25	1592.6	1539.97	1704.3	1728	1952.42	1927.97	1834.89	1443.24	1873.69	1455.31	672.424	1869.05	1757.98	874.267	1755.57	1640.98	1861.25	2222.61	1941.96	1497.22	1583.35
A0A287AQ20	A0A287AQ20	CFI	Sus scrofa	Complement factor I	33	59	membrane	proteolysis,receptor-mediated endocytosis	serine-type endopeptidase activity,scavenger receptor activity	FALSE	100	0.0798243	9.01941	1.77464e-17	5.98128e-17	567.945	560.983	552.49	530.824	492.108	525.783	519.113	508.676	503.44	519.159	505.924	505.905	455.011	505.796	505.745	481.693	500.133	484.616	492.928	543.082	530.496	500.496	459.678	549.455	545.56	556.042	587.232	480.569	439.779	539.642	607.838	630.684	509.944	500.715
A0A287AQB4	A0A287AQB4	ZNF484	Sus scrofa	Zinc finger protein 484	1	1				FALSE	37.5	0.587088	2.75141	0.00110541	0.00156588	NaN	6.91745	10.2199	NaN	5.20945	NaN	3.02142	NaN	2.76764	10.2434	NaN	17.3938	NaN	NaN	NaN	10.2967	NaN	NaN	17.3704	NaN	NaN	NaN	NaN	NaN	NaN	1.59388	NaN	NaN	6.80517	NaN	NaN	NaN	NaN	NaN
A0A287AR98	A0A287AR98	SBSN	Sus scrofa	Suprabasin	4	4				FALSE	99.1	0.319356	4.10093	1.19344e-13	1.86139e-13	20.0504	13.4262	22.8658	8.15455	23.4351	25.1507	25.2543	21.1057	12.6994	16.7843	16.5981	27.3037	28.3409	27.0056	17.2097	26.3402	15.1519	24.2346	15.1701	12.0253	10.7078	22.6493	9.92343	20.4015	4.41387	24.0534	23.782	25.8969	25.2368	18.5591	16.538	25.9183	12.4847	19.8468
A0A287ARC6	A0A287ARC6	RAD23A	Sus scrofa	UV excision repair protein RAD23	3	3	nucleus	nucleotide-excision repair,proteasome-mediated ubiquitin-dependent protein catabolic process	damaged DNA binding	FALSE	25.9	1.13974	2.18312	1.85463e-08	3.57191e-08	NaN	NaN	NaN	40.3473	NaN	NaN	NaN	NaN	NaN	NaN	2.78236	NaN	NaN	NaN	3.03081	1.76369	NaN	NaN	NaN	NaN	NaN	2.81018	7.41478	NaN	1.4453	NaN	5.60326	NaN	NaN	1.61187	3.04274	NaN	4.98539	NaN
A0A287AS29	A0A287AS29	NME1	Sus scrofa	Nucleoside diphosphate kinase	7	7		nucleoside diphosphate phosphorylation,GTP biosynthetic process,UTP biosynthetic process,CTP biosynthetic process	nucleoside diphosphate kinase activity,ATP binding	FALSE	50.9	1.1344	4.69549	5.73546e-07	1.03714e-06	NaN	NaN	NaN	277.545	21.8208	32.941	16.257	17.3538	NaN	NaN	NaN	NaN	NaN	NaN	17.0585	21.5652	17.882	9.73973	NaN	20.6504	20.2965	22.5047	62.9415	NaN	NaN	NaN	81.2363	NaN	NaN	12.3586	36.3739	NaN	27.1255	NaN
A0A287ASJ8	A0A287ASJ8	CHL1	Sus scrofa	Cell adhesion molecule L1 like	2	2	integral component of membrane			FALSE	65.2	0.397511	4.52409	9.69355e-05	0.000154402	NaN	28.3678	57.9998	14.8575	10.2102	25.4474	28.9203	14.8399	NaN	33.0065	40.9598	NaN	12.5456	17.9799	20.6987	36.9255	NaN	33.7307	26.5666	NaN	NaN	27.5604	NaN	NaN	NaN	37.0543	32.2651	24.7084	NaN	19.9597	18.4766	22.0294	14.6328	NaN
A0A287AT18	A0A287AT18	PSMA7	Sus scrofa	Proteasome subunit alpha type	10	10	nucleus,cytoplasm,proteasome core complex, alpha-subunit complex	ubiquitin-dependent protein catabolic process	threonine-type endopeptidase activity	FALSE	100	0.231176	5.84549	2.48841e-15	4.72144e-15	72.5118	69.1105	48.0411	131.93	47.4487	87.0128	64.6535	60.922	64.9611	67.7925	63.777	43.1636	66.2978	58.9844	49.7532	58.5706	65.2764	51.4705	43.5992	47.4138	72.436	53.53	87.5947	70.3174	55.6503	73.6807	75.5604	52.2506	46.5805	44.1896	38.4079	65.1578	57.5926	71.245
A0A287AT36	A0A287AT36	C8B	Sus scrofa	Complement C8 beta chain	30	54				FALSE	100	0.132099	8.08857	1.77464e-17	5.98128e-17	244.73	215.817	227.329	321.959	281.442	249.25	268.919	276.403	281.249	221.763	291.778	227.554	228.505	264.931	278.06	236.999	272.512	307.424	333.191	282.639	284.494	269.647	360.733	214.761	292.823	288.708	273.06	283.236	250.51	308.711	246.961	291.943	269.505	303.455
A0A287AT48	A0A287AT48	LOC100153899	Sus scrofa	Serpin domain-containing protein	24	55				FALSE	100	0.346017	11.5946	6.69441e-17	1.86972e-16	1918.54	2403.14	6460.57	2507.18	5881.91	1812.23	3230.88	3872.79	5121.19	5460.59	3280.14	3386.78	4130.8	3834.58	3117.75	2322.35	3295.38	3129.2	2030.04	3267.93	3114.88	3210.4	908.407	4533	5090.84	2496.77	2265.83	2354.8	3576.32	2484.37	4785.78	4359.68	3306.46	2705.53
A0A287ATE3	A0A287ATE3		Sus scrofa	Ig-like domain-containing protein	2	5				TRUE	83.9	0.853775	8.13114	2.62399e-13	4.0446e-13	166.713	NaN	279.987	254.682	NaN	237.081	310.513	368.639	114.846	175.251	273.314	227.871	225.374	NaN	312.036	246.994	208.05	184.432	124.361	230.49	306.142	209.101	250.2	NaN	143.976	171.903	330.275	NaN	449.459	362.647	263.165	125.492	250.019	1120.73
A0A287ATF0	A0A287ATF0	COLEC10	Sus scrofa	Collectin subfamily member 10	4	4	collagen trimer			FALSE	98.2	0.181111	5.21426	2.03431e-15	3.92407e-15	48.8341	46.5183	30.2876	33.1687	41.2259	26.3353	39.4658	38.919	47.8634	40.226	30.2043	45.6389	NaN	38.5245	42.826	32.3276	30.3808	42.6901	37.6783	30.1066	42.5894	42.2568	33.4595	40.7323	36.1157	41.4781	39.3767	46.2539	28.5363	33.9046	28.5744	38.8882	38.1405	47.7258
A0A287ATF2	A0A287ATF2	DSG2	Sus scrofa	Desmoglein 2	4	4				FALSE	92.9	0.310723	4.28334	1.653e-12	2.56483e-12	21.6401	25.7269	24.4795	29.4047	24.4162	18.5938	21.0902	3.92135	18.8832	15.7533	19.4905	15.359	16.5443	28.4103	NaN	21.9269	20.6366	18.971	21.1802	18.4824	34.5339	22.6539	19.065	31.6635	27.9093	21.9388	NaN	11.8862	25.0338	18.8237	10.9365	30.1376	16.1889	38.2398
A0A287AU23	A0A287AU23	GMFG	Sus scrofa	Glia maturation factor	2	2				FALSE	33	0.804932	3.02863	2.21215e-11	3.69289e-11	NaN	NaN	NaN	43.4362	4.89555	NaN	NaN	NaN	NaN	9.4649	5.22206	NaN	NaN	NaN	5.87614	NaN	8.18243	NaN	NaN	NaN	NaN	NaN	16.6115	NaN	NaN	NaN	NaN	NaN	10.7117	NaN	23.6832	NaN	NaN	NaN
A0A287AU93	A0A287AU93		Sus scrofa	Ig-like domain-containing protein	2	6				FALSE	100	0.437773	9.13788	1.77464e-17	5.98128e-17	326.051	517.386	978.771	683.681	544.458	366.46	620.695	1009.52	313.676	947.011	561.526	369.208	497.208	555.311	619.565	815.309	547.905	414.827	449.009	594.161	595.977	588.555	618.468	518.551	514.397	531.862	589.317	619.268	811.25	746.324	531.297	461.498	640.153	2057.76
A0A287AUR4	A0A287AUR4		Sus scrofa	Ig-like domain-containing protein	4	7				FALSE	100	0.42177	10.0731	2.38419e-15	4.53934e-15	961.801	959.254	1409.71	1566.07	1119.6	882.771	1150.59	2098.56	723.22	1638.93	1167.64	977.994	455.09	750.912	1117.26	1308.76	1312.21	862.184	1018.52	1187.59	1115.7	1160.63	1206.19	951.493	668.711	744.617	1291.6	858.815	1055.32	1867.06	1714.97	701.295	1185.12	2654.32
A0A287AW67	A0A287AW67	LGMN	Sus scrofa	Legumain	10	14				FALSE	100	0.168618	5.99781	5.56311e-17	1.59274e-16	49.0423	65.6125	52.4403	59.1477	59.7555	52.9653	57.0167	69.3749	58.0596	61.2108	59.7518	38.5044	69.7889	59.6818	64.0852	81.6348	67.7067	81.7056	67.4756	58.1422	70.556	57.1582	68.1444	64.2736	52.8165	57.8292	67.7413	48.7804	70.4489	64.0331	64.4329	49.2621	68.1003	64.931
A0A287AW81	A0A287AW81	FLNA	Sus scrofa	Filamin A	24	26				FALSE	97.3	0.555973	6.15817	2.52416e-16	5.98485e-16	61.7872	81.5247	65.2487	223.135	89.0657	63.0114	86.9735	76.7148	43.3482	76.2188	82.7495	58.9123	NaN	65.7939	67.2125	41.6442	84.9619	42.1734	87.7705	71.7943	88.7077	76.8556	339.72	57.7389	73.4817	76.6169	47.0098	58.5733	68.0161	54.5884	271.57	67.2149	82.6163	48.8281
A0A287AWR7	A0A287AWR7	PON1	Sus scrofa	Paraoxonase	14	36	extracellular region		arylesterase activity	FALSE	100	0.29028	9.40227	1.05458e-16	2.77709e-16	631.129	791.023	542.201	485.641	418.361	563.226	711.098	436.152	690.563	447.844	703.043	959.063	765.983	728.135	674.1	761.639	712.945	473.113	932.417	724.704	753.929	663.057	1279.21	684.536	736.336	829.579	1097.43	543.314	963.313	717.738	470.965	686.12	711.387	607.432
A0A287AX98;O97507	A0A287AX98;O97507	F12	Sus scrofa	Coagulation factor XII	21	39	extracellular space;extracellular space	proteolysis;proteolysis,blood coagulation,fibrinolysis	serine-type endopeptidase activity,calcium ion binding;serine-type endopeptidase activity,calcium ion binding	FALSE	100	0.0753003	9.11881	3.06826e-16	7.11669e-16	522.907	603.73	517.2	483.751	575.864	548.179	530.401	517.065	546.65	627.521	546.202	563.515	567.222	601.364	558.628	597.725	547.644	597.845	484.645	524.47	573.027	530.442	585.358	559.961	513.792	520.527	586.856	613.436	704.333	640.154	601.361	518.672	543.414	538.371
A0A287AXI5	A0A287AXI5	IFI6	Sus scrofa	Interferon alpha inducible protein 6	1	1				FALSE	100	0.282703	7.23963	2.35633e-16	5.63114e-16	153.469	148.486	109.689	202.125	97.1459	124.812	121.164	125.948	142.334	179.584	137.603	91.2746	209.819	144.248	144.189	145.756	124.951	112.598	266.966	154.321	205.248	181.264	142.9	145.428	141.158	94.6416	158.208	148.027	169.404	174.134	70.7272	128.981	154.402	173.673
A0A287AXU5;A0A5G2QYS5;F1S7C9;P51781	A0A287AXU5;A0A5G2QYS5;F1S7C9;P51781	LOC100526118;;;	Sus scrofa	Glutathione S-transferase;Glutathione S-transferase;Glutathione S-transferase;Glutathione S-transferase alpha M14	3	3	;;;cytoplasm	;;;glutathione metabolic process	;;;glutathione transferase activity	FALSE	8	1.4323	3.45475	1.97993e-05	3.31818e-05	NaN	NaN	NaN	NaN	14.0978	11.3302	NaN	NaN	NaN	NaN	NaN	NaN	NaN	NaN	NaN	NaN	NaN	NaN	NaN	NaN	NaN	NaN	NaN	NaN	NaN	NaN	NaN	NaN	NaN	NaN	NaN	NaN	NaN	NaN
A0A287AY64	A0A287AY64	GLIPR2	Sus scrofa	GLI pathosis related 2	1	1	extracellular region			FALSE	70.5	0.534363	2.80528	6.6536e-07	1.19957e-06	17.0416	NaN	2.36165	NaN	9.07724	10.8514	15.1373	6.25666	NaN	10.0155	NaN	7.80182	NaN	11.5438	4.05499	13.7085	6.04732	8.84889	2.2523	4.61732	6.26385	10.4212	12.6146	8.36143	8.51467	NaN	8.85482	NaN	7.65875	NaN	2.68516	19.4521	6.00082	NaN
A0A287AYC4;A0A5G2NLY0	A0A287AYC4;A0A5G2NLY0		Sus scrofa	Ig-like domain-containing protein	2	3	;	;	;	FALSE	98.2	0.458598	6.16999	9.43211e-15	1.62978e-14	85.2624	83.3802	46.1409	NaN	53.7681	83.1892	65.5684	183.927	102.273	105.57	84.1897	132.171	142.719	47.249	80.1195	41.4416	104.286	33.7203	72.7216	68.0794	76.1217	73.0262	65.3025	69.228	77.3537	125.257	68.5288	59.1568	73.4719	31.6379	27.0622	90.254	80.6311	32.7713
A0A287AYJ8	A0A287AYJ8	SERPINF1	Sus scrofa	Serpin family F member 1	22	45				FALSE	100	0.0894513	8.79942	7.28312e-16	1.54268e-15	439.972	454.869	390.15	398.378	462.648	448.811	438.922	483.634	430.572	492.197	444.181	364.879	471.025	441.65	444.488	456.359	444.22	419.016	466.852	423.958	434.201	436.318	470.733	431.676	485.175	447.827	413.487	469.578	463.109	468.748	358.151	472.212	445.426	482.631
A0A287AZA7;A0A2C9F3G2;A7U5U2;F1S911;P0CG68;P63053;RS27A_HUMAN	A0A287AZA7;A0A2C9F3G2;A7U5U2;F1S911;P0CG68;P63053	RPS27A;UBC;UBB;UBA52;UBC;UBA52;	Sus scrofa;Sus scrofa;Sus scrofa;Sus scrofa;Sus scrofa;Sus scrofa;	Ubiquitin-40S ribosomal protein S27a;Ubiquitin C;Ubiquitin B;Ubiquitin-60S ribosomal protein L40;Polyubiquitin-C;Ubiquitin-ribosomal protein eL40 fusion protein	4	5	ribosome;;;;nucleus,cytoplasm;nucleus,large ribosomal subunit,cytoplasmic side of rough endoplasmic reticulum membrane;	translation;;;;;translation;	structural constituent of ribosome;;;;;structural constituent of ribosome;	FALSE	98.2	1.12574	6.78637	4.63746e-13	7.12752e-13	62.8435	113.679	56.0944	1437.86	100.384	155.757	129.2	110.259	69.8636	94.2798	138.701	48.1354	54.2006	75.6116	152.873	107.126	148.564	88.3455	88.389	151.395	119.72	162.454	411.956	47.5961	69.1436	106.026	381.561	96.2826	128.548	79.0911	179.965	40.8706	101.631	102.577
A0A287AZK2	A0A287AZK2	TAGLN	Sus scrofa	Transgelin	6	6			actin filament binding	FALSE	55.4	0.56007	3.75927	1.62462e-10	2.9278e-10	13.1522	NaN	NaN	39.9817	NaN	13.8869	NaN	13.9755	NaN	25.942	19.9713	NaN	NaN	19.4278	19.5097	NaN	10.5935	10.866	NaN	14.5455	9.56288	11.5333	NaN	NaN	NaN	NaN	4.93269	11.8921	28.4671	NaN	46.7744	NaN	8.99444	5.09689
A0A287B088	A0A287B088	PSMB4	Sus scrofa	Proteasome subunit beta	4	4	nucleus,cytoplasm,proteasome core complex	proteolysis involved in cellular protein catabolic process	threonine-type endopeptidase activity	FALSE	100	0.258766	4.83743	1.77464e-17	5.98128e-17	27.5188	43.3528	30.0921	46.0224	24.8634	32.6728	18.2653	20.2825	30.3969	26.4992	20.1894	26.4995	44.4697	23.0032	13.8429	31.629	26.7175	30.821	32.4222	33.7764	41.1078	33.3784	40.9723	33.9335	28.1768	23.4486	44.8244	27.8076	19.4954	31.1204	29.4216	32.2156	25.2234	30.6158
A0A287B0Z8	A0A287B0Z8	INMT	Sus scrofa	Indolethylamine N-methyltransferase isoform 1	6	7		methylation	methyltransferase activity	FALSE	39.3	0.819795	4.24233	2.08309e-09	4.01157e-09	NaN	NaN	NaN	113.096	10.4449	10.2672	NaN	14.2047	NaN	NaN	19.2184	NaN	NaN	NaN	NaN	NaN	15.6123	NaN	NaN	29.6111	NaN	10.6602	32.4576	NaN	NaN	NaN	26.9217	NaN	17.1935	NaN	NaN	NaN	NaN	23.8938
A0A287B1U6	A0A287B1U6	NELL2	Sus scrofa	Neural EGFL like 2	10	10			calcium ion binding	FALSE	100	0.180231	5.75541	1.77464e-17	5.98128e-17	70.1953	28.4647	68.5873	61.4062	43.6943	74.3075	66.1246	62.9725	54.5849	53.612	58.3616	69.0129	52.0058	65.2111	46.5796	61.4176	50.9173	60.4157	61.3453	56.7828	54.9218	59.8458	81.0119	39.7221	45.5988	40.9389	43.5578	76.0586	49.9723	55.979	65.1121	40.519	52.5413	51.9025
A0A287B2P1	A0A287B2P1	CLIC1	Sus scrofa	Chloride intracellular channel protein	2	2				FALSE	32.1	0.61712	4.75807	3.34553e-08	6.3932e-08	NaN	NaN	NaN	89.7295	NaN	29.6264	NaN	NaN	NaN	NaN	NaN	NaN	NaN	17.6338	NaN	24.6419	25.7814	NaN	27.2685	NaN	NaN	26.8614	52.4718	NaN	NaN	NaN	NaN	NaN	NaN	11.3195	52.1451	20.2293	NaN	30.0403
A0A287B356	A0A287B356		Sus scrofa	Translation elongation factor IF5A C-terminal domain-containing protein	3	3		translational frameshifting,positive regulation of translational elongation,positive regulation of translational termination	translation elongation factor activity,ribosome binding	FALSE	22.3	0.931119	5.05125	1.85546e-09	3.56774e-09	NaN	NaN	NaN	201.792	NaN	NaN	19.1617	NaN	NaN	NaN	NaN	NaN	NaN	NaN	NaN	NaN	NaN	NaN	NaN	56.8259	NaN	NaN	49.578	NaN	NaN	NaN	26.3328	NaN	22.9855	NaN	30.9939	NaN	NaN	NaN
A0A287B3S3	A0A287B3S3	ITIH1	Sus scrofa	Inter-alpha-trypsin inhibitor heavy chain 1	9	23		negative regulation of endopeptidase activity,hyaluronan metabolic process	serine-type endopeptidase inhibitor activity	FALSE	100	0.0846929	10.1307	3.00814e-16	6.99264e-16	1165.86	1266.24	1025.47	1124.44	971.982	1082.36	1101.81	1010.9	1063.43	1009.34	997.731	1082.67	1178.88	1105.93	1090.74	1111.24	1182.9	1297.7	1204.04	1172.06	1089.62	1224.41	1149.77	1277.56	1161.84	1310.78	915.404	1127.22	1120.46	1229.89	1057.98	1142.21	1163.3	1175.32
A0A287B4X5	A0A287B4X5	SENP6	Sus scrofa	SUMO specific peptidase 6	1	2				FALSE	91.1	0.314464	5.60482	0.00050187	0.000743476	31.0871	43.5308	55.201	32.3779	76.62	31.3145	48.7714	74.7456	31.3478	45.8901	43.6278	71.6501	22.6569	29.9351	47.4198	NaN	30.8861	46.8896	51.1524	66.237	50.0562	57.772	44.342	50.0955	47.9608	61.3368	52.3746	32.7407	66.6998	37.159	NaN	NaN	59.4391	NaN
A0A287B5G0	A0A287B5G0		Sus scrofa	Ig-like domain-containing protein	3	7				FALSE	100	0.920983	7.81656	3.6145e-14	5.84307e-14	176.44	175.473	244.557	244.971	235.263	194.775	212.283	185.116	87.3387	164.482	226.974	116.524	1406.42	251.542	257.846	285.515	248.574	171.691	167.172	225.476	239.35	220.34	199.108	153.81	87.5619	144.911	140.869	246.924	274.135	281.528	254.626	122.206	224.024	721.753
A0A287B5T6;A0A8W4F8A7	A0A287B5T6;A0A8W4F8A7	ARF3;ARF1	Sus scrofa	ADP-ribosylation factor;ADP ribosylation factor 1	6	7	intracellular;	;	GTP binding;	FALSE	97.3	0.728573	4.92963	3.95661e-12	6.25e-12	22.4974	42.2769	15.0083	222.564	33.3169	29.1406	20.8103	35.0738	31.222	26.9812	29.1863	28.9591	16.0572	29.6113	25.4948	16.6039	53.4833	15.0905	35.8076	34.8366	30.8556	49.8523	115.639	14.9775	26.0457	31.4698	49.1074	20.029	40.688	17.4749	79.4176	25.6696	34.2229	24.8371
A0A287B5W2;P00761;TRYP_PIG	A0A287B5W2;P00761;TRYP_PIG	LOC100302368;;	Sus scrofa;Sus scrofa;	Trypsinogen isoform X1;Trypsin;	10	23	;extracellular space;	proteolysis;proteolysis,digestion;	serine-type endopeptidase activity;serine-type endopeptidase activity,protein binding,metal ion binding;	FALSE	100	0.123261	14.0115	1.77464e-17	5.98128e-17	16457.1	20709.1	17425.2	16000.5	17486.5	17109.9	17296.3	15961.6	17410.1	18222.7	13880.6	15378.9	16872.4	18748.5	16097.8	16691.1	13007.8	18538.2	14536.2	15714.5	17001.9	16281	17624.4	16780.3	16969.9	16632	16744.4	17382.9	23683.6	15646.6	18358.6	14881.4	13913.9	19146.3
A0A287B5Y6	A0A287B5Y6	LBP	Sus scrofa	Lipopolysaccharide-binding protein	13	16	extracellular space	acute-phase response,innate immune response,defense response to Gram-negative bacterium	lipopolysaccharide binding	FALSE	100	0.325212	6.71121	1.00035e-14	1.72247e-14	32.3824	185.282	173.762	135.952	153.38	32.5712	92.0651	115.913	70.9646	178.891	113.288	60.451	98.5335	50.4058	115.005	180.335	112.388	109.683	90.387	110.411	121.539	110.427	59.3015	149.212	99.8384	67.4603	148.896	120.056	89.9325	36.1905	127.784	105.972	111.048	96.1088
A0A287B6Q2	A0A287B6Q2	CD55	Sus scrofa	Sushi domain-containing protein	4	4				FALSE	97.3	0.201363	5.35253	1.27913e-10	2.28488e-10	48.23	35.7437	31.8699	40.0818	49.5381	45.4331	37.2453	39.9137	37.474	49.8162	37.9611	45.7646	36.2469	44.3195	50.5954	36.9397	51.6842	52.4134	40.0071	34.6687	34.135	38.6839	51.2191	30.4164	43.761	20.9884	40.9648	34.4454	35.8221	44.0424	35.6278	41.5396	48.3979	49.2041
A0A287B6S5	A0A287B6S5	ENO1	Sus scrofa	phosphopyruvate hydratase	6	6	phosphopyruvate hydratase complex	glycolytic process	magnesium ion binding,phosphopyruvate hydratase activity	FALSE	92	0.647854	4.67763	3.17238e-11	5.36888e-11	20.7836	38.9971	NaN	162.378	30.5076	39.3914	36.8399	23.533	14.8968	25.0023	27.7362	NaN	NaN	18.4628	28.71	22.6038	18.8874	13.397	18.4748	30.5684	26.3167	31.4567	59.7046	16.3243	24.2704	26.7655	60.4143	NaN	30.0584	31.1152	30.6161	NaN	23.1825	24.2676
A0A287B762	A0A287B762	ENPP2	Sus scrofa	Ectonucleotide pyrophosphatase/phosphodiesterase 2	8	8				FALSE	100	0.160179	5.34442	2.82318e-16	6.6095e-16	34.5989	43.3281	41.3441	37.6738	44.727	43.5079	55.4114	29.5819	39.0655	45.3786	41.7398	42.5797	45.1211	52.904	40.5251	44.877	38.7978	37.1371	45.6875	33.6048	43.2	40.2715	39.2275	55.6623	43.149	31.8749	32.0129	47.5201	42.0419	39.7538	41.5379	33.1858	45.7188	54.9216
A0A287B863	A0A287B863	ACAN	Sus scrofa	Aggrecan	5	5		cell adhesion	hyaluronic acid binding	FALSE	100	0.221934	5.43017	1.79864e-13	2.78493e-13	53.7297	76.9384	43.8239	56.3862	27.9414	45.8009	39.4857	36.5016	42.7651	39.2886	51.9428	57.4143	40.2663	35.3997	45.9529	40.9398	41.5881	56.6289	47.26	52.3551	51.8876	41.4359	66.5384	64.1133	47.0874	46.089	43.374	38.6048	43.6886	42.0276	21.63	54.3402	42.3878	55.4343
A0A287B9B3	A0A287B9B3	SERPINF2	Sus scrofa	Alpha-2-antiplasmin isoform X2	27	59	extracellular space,integral component of membrane	negative regulation of endopeptidase activity,negative regulation of fibrinolysis	serine-type endopeptidase inhibitor activity	FALSE	100	0.0666808	9.96776	1.77464e-17	5.98128e-17	1071.6	1137.64	1022.44	884.911	1121.63	1046.72	947.346	977.321	1043	1004.93	981.561	996.548	1073.16	1069.83	952.473	1007.24	963.414	925.576	995.009	982.216	951.799	947.353	959.932	1167.7	1050.62	972.924	927.424	1083.86	1081.44	1038.77	1020.03	949.213	975.631	1068.16
A0A287B9B9	A0A287B9B9	IL1RAP	Sus scrofa	Interleukin 1 receptor accessory protein	6	6	integral component of membrane	cytokine-mediated signaling pathway	interleukin-1 receptor activity	FALSE	100	0.20716	6.31253	4.67648e-16	1.03632e-15	64.7678	48.4825	80.7677	68.8081	86.5408	85.5201	77.2441	81.7399	86.0529	74.5851	61.6167	67.514	57.5381	72.1637	70.4713	75.7491	83.637	87.6145	84.825	80.2886	98.2783	86.5901	107.438	46.7226	83.272	65.5099	95.3456	60.462	99.0713	55.4497	52.8096	59.9482	75.6971	68.332
A0A287BAB3	A0A287BAB3		Sus scrofa	Ig-like domain-containing protein	5	8				FALSE	100	0.249725	8.9769	1.07424e-12	1.65755e-12	625.184	466.786	562.165	404.33	290.869	687.098	605.619	529.018	566.259	573.506	508.765	554.578	698.509	349.965	519.143	633.439	520.199	347.469	325.699	528.536	539.976	503.038	389.732	364.962	459.169	494.05	546.888	773.721	363.846	433.955	433.815	399.232	554.099	804.838
A0A287BAB9	A0A287BAB9	KLK10	Sus scrofa	Kallikrein related peptidase 10	1	1		proteolysis	serine-type endopeptidase activity	FALSE	95.5	0.475542	7.99933	1.45249e-11	2.38789e-11	267.838	194.427	111.458	154.627	140.24	261.605	298.197	289.653	295.285	295.66	228.044	445.443	452.603	173.092	303.667	176	325.205	137.407	NaN	306.834	256.566	270.827	524.05	NaN	349.101	323.461	153.975	280.441	184.201	177.471	108.51	258.013	258.64	NaN
A0A287BAK1	A0A287BAK1	TLN1	Sus scrofa	Talin 1	21	26				FALSE	96.4	0.873117	4.25423	9.78239e-13	1.50806e-12	19.6232	43.4613	14.1166	90.1533	26.7225	11.9032	26.5208	20.0202	12.0411	28.8453	24.8401	16.0373	11.0107	18.8997	21.9635	11.546	21.6522	17.2303	15.0738	21.5377	24.814	23.9665	135.705	8.83297	17.0558	13.2041	19.4161	14.0263	32.1	9.83844	118.361	12.0838	16.9706	16.6886
A0A287BAM0;Q29243	A0A287BAM0;Q29243	DAG1	Sus scrofa	Dystroglycan 1	1	1	dystrophin-associated glycoprotein complex,integral component of membrane;extracellular space,nucleoplasm,cytoplasm,cytoskeleton,dystrophin-associated glycoprotein complex,integral component of membrane,cell junction,sarcolemma,postsynaptic membrane	cytoskeletal anchoring at plasma membrane;cytoskeletal anchoring at plasma membrane	calcium ion binding;calcium ion binding	FALSE	99.1	0.207469	6.82697	6.30488e-14	9.99637e-14	99.5633	82.5546	161.632	130.2	97.9066	89.902	95.4735	149.749	111.744	131.581	81.2921	83.3015	120.22	144.955	103.522	115.928	100.865	122.85	165.695	93.3282	160.397	121.812	98.2805	131.7	85.4771	104.097	155.312	147.967	150.196	114.203	65.5672	102.04	105.335	133.714
A0A287BAY9	A0A287BAY9	ALB	Sus scrofa	Albumin	5	6	extracellular space			FALSE	100	0.179798	14.0865	2.71352e-12	4.249e-12	15779.1	19223.3	18178.7	24199.4	16178.6	16337.6	20237.1	16838.6	18475.8	23868.8	16463.5	17484.8	16378	21798.3	20576.3	17581.6	14002.5	16829.4	20443.4	17688.4	21444.2	17163.7	32225.6	15082.7	16122.3	14635.4	21531.9	22020.2	18152.6	14566.8	15826.2	16337.8	17745.4	17244.9
A0A287BAZ6	A0A287BAZ6	PRDX2	Sus scrofa	Peroxiredoxin 2	13	23				FALSE	99.1	2.08176	7.02689	1.83971e-14	3.06453e-14	51.6901	167.812	41.5897	5036.42	198.823	280.317	301.388	190.015	43.1638	130.009	269.532	37.4225	NaN	50.2933	279.271	179.04	242.82	59.2108	61.7231	233.29	269.053	247.931	820.461	41.4866	28.1669	111.954	911.24	57.5768	224.415	87.6042	331.956	19.5109	247.752	79.7628
A0A287BB44	A0A287BB44	MMRN2	Sus scrofa	Multimerin 2	1	1				FALSE	42.9	0.482887	3.05486	0.000609624	0.000893878	10.96	NaN	NaN	NaN	NaN	18.3898	NaN	7.14423	NaN	6.3125	NaN	NaN	NaN	7.21458	13.6643	13.2737	NaN	NaN	10.2484	NaN	13.9985	NaN	NaN	NaN	4.62585	4.93461	NaN	NaN	13.3349	3.34705	NaN	NaN	NaN	NaN
A0A287BBG5	A0A287BBG5	PCM1	Sus scrofa	Pericentriolar material 1	1	1	centrosome	microtubule anchoring at centrosome,cilium morphogenesis,protein localization to centrosome		FALSE	4.5	0.436001	4.45967	1.37819e-05	2.33158e-05	NaN	NaN	NaN	NaN	NaN	NaN	NaN	NaN	NaN	NaN	NaN	NaN	NaN	NaN	NaN	NaN	NaN	NaN	NaN	NaN	NaN	NaN	NaN	NaN	NaN	NaN	NaN	NaN	NaN	NaN	NaN	NaN	NaN	NaN
A0A287BBK0	A0A287BBK0	DDAH1	Sus scrofa	dimethylargininase	7	8				FALSE	33	0.980493	4.05192	2.58586e-09	4.99192e-09	14.9781	NaN	NaN	127.247	10.9328	NaN	NaN	NaN	NaN	NaN	14.6768	NaN	NaN	NaN	NaN	NaN	6.55025	NaN	NaN	11.027	NaN	13.2177	32.0289	NaN	NaN	NaN	24.9296	NaN	14.1207	NaN	11.0051	NaN	14.8043	NaN
A0A287BBW6	A0A287BBW6		Sus scrofa	USP domain-containing protein	1	1		ubiquitin-dependent protein catabolic process,protein deubiquitination	thiol-dependent ubiquitinyl hydrolase activity	FALSE	98.2	0.212184	8.45681	7.94659e-10	1.50376e-09	381.774	349.669	594.866	255.285	267.766	365.025	408.083	466.355	370.043	386.708	337.698	390.792	NaN	336.182	358.862	470.436	350.113	342.261	334.634	429.107	307.042	468.641	247.766	357.396	421.159	363.399	363.887	330.323	250.588	322.949	324.153	432.941	309.865	259.712
A0A287BCT9	A0A287BCT9	EXTL2	Sus scrofa	Exostosin like glycosyltransferase 2	8	12				FALSE	100	0.100539	6.16607	4.09209e-17	1.222e-16	70.4125	66.0364	68.8035	70.1067	66.018	76.2521	77.3673	79.9282	81.2639	70.2487	75.4336	82.5585	70.3932	77.5381	79.7961	78.5983	64.4132	76.5119	84.1566	67.1259	71.1486	71.173	79.8422	65.4448	75.0112	64.4336	68.4815	74.9141	78.7744	75.1085	72.199	67.4135	67.6421	79.5451
A0A287BD18	A0A287BD18	CFH	Sus scrofa	Sushi domain-containing protein	70	154				FALSE	100	0.0727284	10.6569	1.77464e-17	5.98128e-17	1681.53	1583.55	1735.04	1497.22	1503.74	1621.92	1596.89	1671.04	1830.82	1884.66	1565.47	1689.27	1656.55	1716.5	1568.69	1588.96	1595.86	1583.39	1631.2	1635.06	1560.48	1598.31	1559.46	1693.47	1800.49	1877.89	1756.68	1471.78	1328.33	1600.4	1640.65	1827.08	1564.26	1619.23
A0A287BDE8	A0A287BDE8	AHSG	Sus scrofa	Alpha-2-HS-glycoprotein	3	6				TRUE	100	0.228227	12.2891	5.92446e-12	9.46124e-12	6278.92	5781.59	4335.33	3923.72	6683.99	4184.99	7198.03	4033.61	3043.35	9706.57	4849.39	4034.4	4221.66	8045.55	5723.4	5103.25	4875.48	3050.96	6551.75	4337.57	4797.5	4629.56	6112.6	5791.44	4578.32	3999.71	4723.09	6302.1	5451.83	5971.17	4351	4079.95	3977.29	7469.66
A0A287BDI2;I3LP35	A0A287BDI2;I3LP35		Sus scrofa	Peptidase S1 domain-containing protein	4	4	;secretory granule	proteolysis;proteolysis,defense response to fungus,neutrophil mediated killing of gram-positive bacterium	serine-type endopeptidase activity;serine-type endopeptidase activity	FALSE	93.8	0.378207	4.78664	5.15768e-12	8.20448e-12	33.4423	46.7341	33.2392	NaN	18.0249	16.1631	22.7316	31.8734	32.0754	16.5789	28.9808	55.4147	33.6391	36.6402	29.1372	24.3459	24.0501	36.6819	22.1173	19.8847	27.4521	33.0767	NaN	61.7524	32.1051	20.6138	31.9758	11.7858	24.055	16.2853	25.634	33.5387	29.304	25.634
A0A287BDS7	A0A287BDS7	CORO1A	Sus scrofa	Coronin	1	1				FALSE	33	0.516794	3.65772	2.15776e-10	3.92814e-10	NaN	NaN	NaN	NaN	17.5914	15.6016	NaN	14.9968	NaN	NaN	NaN	NaN	6.73611	NaN	NaN	NaN	12.3959	NaN	24.1556	5.27002	NaN	NaN	NaN	30.7025	NaN	NaN	NaN	NaN	5.49706	NaN	NaN	NaN	21.247	NaN
A0A287BDV3	A0A287BDV3		Sus scrofa	Uncharacterized protein	3	6				FALSE	100	0.516307	6.14602	5.85272e-16	1.26719e-15	45.5945	55.0728	83.3683	106.298	57.6104	37.1037	72.6006	87.3374	34.0689	88.2709	79.1707	48.6472	75.8543	28.4442	76.1934	105.371	87.1803	45.4744	58.5668	91.4088	73.3918	85.2909	90.9004	63.6923	55.6907	103.003	102.411	48.99	44.4367	114.243	127.537	44.673	78.9551	235.136
A0A287BDV9	A0A287BDV9	GPD1	Sus scrofa	Glycerol-3-phosphate dehydrogenase [NAD(+)]	2	2	glycerol-3-phosphate dehydrogenase complex	carbohydrate metabolic process,glycerol-3-phosphate catabolic process,oxidation-reduction process	glycerol-3-phosphate dehydrogenase [NAD+] activity,protein homodimerization activity,NAD binding	FALSE	22.3	0.69103	3.9825	4.67666e-12	7.41952e-12	NaN	13.6494	NaN	NaN	24.6044	19.7573	NaN	24.5819	NaN	NaN	NaN	NaN	NaN	NaN	NaN	NaN	NaN	NaN	NaN	NaN	NaN	NaN	NaN	NaN	NaN	10.9024	NaN	NaN	NaN	NaN	NaN	NaN	8.72595	NaN
A0A287BE52	A0A287BE52	PSIP1	Sus scrofa	PC4 and SFRS1 interacting protein 1	1	1				FALSE	4.5	0.373214	2.29088	6.82247e-05	0.000110061	NaN	NaN	NaN	NaN	NaN	NaN	NaN	NaN	NaN	NaN	NaN	NaN	NaN	NaN	NaN	NaN	6.13384	NaN	NaN	NaN	NaN	NaN	NaN	NaN	NaN	7.74632	NaN	NaN	NaN	NaN	NaN	NaN	NaN	NaN
A0A287BEY3	A0A287BEY3	LOC100624077	Sus scrofa	Endogenous retrovirus group V member 2 Env polyprotein	7	8				FALSE	100	0.128029	6.27765	1.77464e-17	5.98128e-17	67.6451	86.0665	89.2341	72.433	87.9699	78.1786	80.715	71.4036	90.3677	77.2182	71.5363	77.0838	75.0016	97.2155	96.8163	81.3647	71.3559	98.5062	91.1005	80.0735	78.9651	86.7176	60.5253	79.1825	70.3043	74.2614	84.7947	84.685	106.345	84.1794	53.3335	64.4381	75.0655	84.0093
A0A287BFE8	A0A287BFE8	ASCL2	Sus scrofa	Achaete-scute family bHLH transcription factor 2	1	1		regulation of transcription from RNA polymerase II promoter	DNA binding,protein dimerization activity	FALSE	5.4	0.632145	7.13298	5.52499e-05	8.97756e-05	NaN	NaN	NaN	NaN	NaN	NaN	NaN	NaN	NaN	NaN	NaN	NaN	NaN	NaN	NaN	NaN	NaN	NaN	NaN	NaN	NaN	NaN	NaN	NaN	NaN	NaN	NaN	351.127	NaN	NaN	NaN	NaN	NaN	NaN
A0A287BFY0	A0A287BFY0	ALDOA	Sus scrofa	Fructose-bisphosphate aldolase	17	22				FALSE	100	0.70873	5.83022	8.11697e-17	2.21041e-16	30.8303	94.9661	33.1107	88.3198	147.025	148.3	63.4518	117.241	34.9746	108.953	72.0249	29.4476	31.4021	29.1384	70.9208	38.8101	63.7058	32.4704	38.1317	65.4491	69.3608	74.5364	57.8485	45.0241	38.2732	91.7511	53.4399	37.322	42.0352	25.8991	48.0945	76.7437	66.7173	50.2533
A0A287BGW4	A0A287BGW4	ALAD	Sus scrofa	Delta-aminolevulinic acid dehydratase	9	9		porphyrin-containing compound biosynthetic process	porphobilinogen synthase activity,metal ion binding	TRUE	40.2	0.991767	4.37693	1.77826e-13	2.75384e-13	NaN	NaN	NaN	169.707	NaN	16.3903	NaN	NaN	NaN	NaN	31.0777	NaN	NaN	NaN	29.4964	12.07	14.0943	NaN	NaN	20.5225	28.283	13.4139	34.1144	NaN	20.015	NaN	45.9775	NaN	17.324	NaN	NaN	NaN	12.8487	NaN
A0A287BH21	A0A287BH21	LOC100156325	Sus scrofa	Serpin domain-containing protein	27	55				FALSE	100	0.328967	12.1216	1.77464e-17	5.98128e-17	4754.72	7360.92	12234	4093.94	5393.74	3950.92	4642.96	3226.43	5773.33	5938.08	4689.37	3884.1	3821.01	6136.23	4531.03	6177.57	4711.49	5702.83	4651.3	4546.29	4616.65	4575.74	1922.28	10041.7	7789.46	5310.41	4647.05	4746.41	6377.83	5436.92	5450.84	7708.5	4663.58	3166.65
A0A287BH28;A0A287BHK5	A0A287BH28;A0A287BHK5		Sus scrofa	Ig-like domain-containing protein	3	6	;	;	;	FALSE	100	0.580685	9.7815	1.12487e-15	2.28576e-15	595.16	1086.87	444.313	1676	783.372	534.669	1074.3	813.144	478.832	426.768	978.638	1001.71	2743.98	848.535	1069.48	394.581	970.627	1165.03	705.026	945.328	831.05	919.865	535.428	1162.68	780.643	992.439	1229.18	797.963	935.285	777.345	761.975	765.071	1080.47	2469.51
A0A287BHE6	A0A287BHE6	SULT6B1	Sus scrofa	Sulfotransferase	1	1			sulfotransferase activity	FALSE	40.2	0.854135	5.35937	0.000719933	0.00104601	NaN	NaN	27.373	NaN	NaN	19.1036	11.3262	NaN	NaN	NaN	NaN	127.158	46.3527	NaN	34.1806	NaN	35.5543	NaN	NaN	NaN	NaN	NaN	NaN	69.6573	59.7069	NaN	22.5694	NaN	NaN	16.7025	NaN	72.5631	37.3394	NaN
A0A287BHH5	A0A287BHH5	LGI3	Sus scrofa	Leucine rich repeat LGI family member 3	1	1			catalytic activity	FALSE	46.4	0.617336	5.58072	9.47046e-05	0.00015098	74.2085	NaN	25.7656	77.8833	NaN	24.7051	20.8531	62.0526	NaN	NaN	NaN	40.3141	14.7797	76.2538	NaN	NaN	32.9528	NaN	111.66	110.777	NaN	52.0175	NaN	126.655	NaN	NaN	NaN	NaN	NaN	44.6781	34.8526	36.8092	55.0823	63.3168
A0A287BIL8	A0A287BIL8	HSPA5	Sus scrofa	78 kDa glucose-regulated protein	9	9			ATP binding	FALSE	100	0.142332	5.32129	1.42915e-11	2.34816e-11	50.5797	43.7065	36.6699	42.9381	46.8099	41.038	37.7774	35.8418	32.5717	44.1066	42.0993	33.31	38.0629	38.7011	42.1244	41.5862	34.9137	37.3924	34.7184	33.6655	32.3707	36.2695	56.6687	39.5065	37.3322	36.8263	41.6617	42.1397	36.7668	38.7281	51.1627	42.5995	42.2663	39.4279
A0A287BIN3	A0A287BIN3	CACNA2D1	Sus scrofa	Calcium voltage-gated channel auxiliary subunit alpha2delta 1	2	2				FALSE	67.9	0.4294	3.85573	1.03664e-10	1.83705e-10	NaN	6.46156	17.935	11.8799	16.5763	31.0503	NaN	13.2567	9.87913	9.06186	17.505	NaN	16.3768	22.56	NaN	19.883	NaN	17.2056	NaN	10.8965	41.7789	20.124	NaN	7.825	NaN	14.0488	9.64773	NaN	17.0241	8.84313	13.7586	NaN	18.2764	NaN
A0A287BJ64	A0A287BJ64	AZGP1	Sus scrofa	Alpha-2-glycoprotein 1, zinc-binding	18	38	integral component of membrane			FALSE	100	0.133021	8.12979	1.77464e-17	5.98128e-17	215.839	285.389	232.904	286.214	265.956	240.28	277.308	291.672	260.672	331.419	292.542	235.057	241.543	265.282	268.964	232.126	286.303	273.334	290.767	276.868	282.247	275.39	353.102	284.455	297.005	271.312	302.971	284.354	242.901	275.676	296.764	320.129	275.909	328.27
A0A287BJ65	A0A287BJ65	LCN2	Sus scrofa	Lipocalin 2	2	2				FALSE	84.8	0.421467	4.94296	1.71715e-10	3.10077e-10	45.2581	33.052	40.8621	33.3044	58.7298	44.1305	27.9396	NaN	NaN	28.2851	41.9734	NaN	37.1751	91.6777	34.027	NaN	30.1336	50.6251	42.4453	41.7109	NaN	37.8415	25.4686	56.9588	43.9444	34.644	27.9797	NaN	28.9304	53.0407	12.6275	29.0512	8.62823	50.9757
A0A287BJL7	A0A287BJL7	IGF2	Sus scrofa	Insulin-like growth factor II	3	4				FALSE	100	0.151102	5.9158	1.77464e-17	5.98128e-17	60.7017	72.9644	58.7636	57.2968	39.7399	60.0775	57.1166	63.6799	63.7677	52.6493	58.947	39.7921	54.0866	62.3217	48.4297	59.1696	56.8519	75.0754	62.1243	59.9086	57.5157	58.0632	61.897	79.8139	70.5491	71.7032	69.6015	50.1533	53.8515	55.8522	48.9701	58.2848	47.7091	60.473
A0A287BJW1	A0A287BJW1	SMPDL3B	Sus scrofa	Sphingomyelin phosphodiesterase acid like 3B	11	16				FALSE	100	0.125614	6.0833	1.32746e-15	2.65707e-15	54.72	64.1887	57.5982	77.0986	86.2016	58.5558	74.7235	63.6276	61.1387	69.9937	68.1914	52.503	75.8713	68.1112	70.4007	71.6303	68.5521	63.8155	75.9309	74.022	76.2438	76.0369	90.2645	49.8565	67.6218	67.1446	82.4758	61.4605	75.4626	57.9783	52.3455	62.481	68.4408	68.0292
A0A287BKE8	A0A287BKE8	H6PD	Sus scrofa	Hexose-6-phosphate dehydrogenase/glucose 1-dehydrogenase	15	15				FALSE	100	0.191975	5.45785	2.9614e-14	4.82628e-14	43.094	54.0333	54.8159	49.7203	40.2083	38.6759	38.9958	75.0489	55.9282	54.9466	41.1639	51.7793	53.274	48.3571	39.8192	44.4982	48.6923	33.2406	50.4507	36.0942	36.3558	49.6622	39.0809	71.5382	49.9301	37.1656	46.4468	51.9935	29.5191	35.3712	41.8119	48.1756	48.2027	41.9793
A0A287BKJ2	A0A287BKJ2	FGL1	Sus scrofa	Fibrinogen like 1	8	9				FALSE	100	0.213869	5.81797	1.00944e-14	1.73719e-14	36.7832	48.5023	75.8422	85.6942	59.7914	58.2633	63.0937	56.0933	70.7256	68.9417	55.9121	56.1767	56.1521	64.0779	59.1868	64.65	40.4372	43.1423	45.8381	65.615	63.4475	62.4457	35.83	60.1442	53.6343	49.5332	36.8795	56.3411	61.1215	58.9423	46.4358	44.0882	50.8826	74.5935
A0A287BKK6	A0A287BKK6	KIFAP3	Sus scrofa	Kinesin associated protein 3	1	1				FALSE	93.8	0.289759	5.57623	2.54088e-09	4.90421e-09	54.8185	48.7184	57.9538	27.7213	45.2869	54.2819	55.0962	24.995	23.1146	50.8868	67.3754	42.5528	68.2825	36.4461	51.8974	55.759	44.0068	49.9142	43.6309	46.1117	37.0506	59.7584	44.6334	50.8723	30.9901	36.546	62.7211	54.8668	NaN	33.1999	60.5312	NaN	63.467	96.6998
A0A287BKZ4	A0A287BKZ4	CDH6	Sus scrofa	Cadherin 6	8	8	integral component of membrane	homophilic cell adhesion via plasma membrane adhesion molecules	calcium ion binding	FALSE	100	0.214385	5.18122	9.67493e-15	1.6692e-14	28.881	36.54	52.7561	38.104	46.5834	33.0785	48.2852	37.439	28.9436	42.1874	42.6461	21.6285	26.3837	35.1851	28.8232	50.6333	36.5431	47.787	38.3374	43.9583	36.3724	29.4494	25.77	37.9244	39.2077	31.7008	29.5736	43.0321	35.6656	47.8102	22.022	23.5933	37.6476	51.8177
A0A287BL83	A0A287BL83		Sus scrofa	Carbonyl reductase (NADPH)	9	10				FALSE	55.4	1.29793	3.53125	1.04048e-07	1.94836e-07	NaN	12.0883	NaN	153.384	7.64452	10.9432	7.1833	9.99039	NaN	NaN	11.5797	NaN	NaN	NaN	23.5712	11.5793	18.5215	NaN	NaN	9.7628	12.5352	7.24272	31.0781	NaN	NaN	11.7859	27.3261	NaN	7.23295	NaN	20.0258	NaN	6.69366	NaN
A0A287BLF6	A0A287BLF6		Sus scrofa	Sushi domain-containing protein	3	3				FALSE	73.2	0.401047	4.57914	4.17919e-09	8.09518e-09	35.6948	9.69399	NaN	30.6148	NaN	28.2803	NaN	31.5143	28.2183	NaN	NaN	63.5488	NaN	17.383	31.5399	18.7585	28.3111	10.6219	23.1031	28.5827	NaN	17.2831	NaN	NaN	NaN	14.196	29.9632	25.364	16.2773	25.4987	18.3081	NaN	28.3153	29.7852
A0A287BLH9	A0A287BLH9		Sus scrofa	Ig-like domain-containing protein	4	9				FALSE	81.2	0.485225	7.86094	7.9748e-15	1.39221e-14	198.69	324.099	288.312	NaN	416.429	195.344	236.194	NaN	82.5476	152.192	210.779	144.639	196.72	348.679	231.548	238.706	188.747	229.496	148.329	197.616	234.457	201.769	NaN	379.4	189.81	228.743	209.526	432.979	NaN	19.1118	308.396	181.345	216.975	860.84
A0A287BLK5	A0A287BLK5	PREX2	Sus scrofa	Phosphatidylinositol-3,4,5-trisphosphate dependent Rac exchange factor 2	1	1				FALSE	44.6	1.46133	4.41383	8.91457e-11	1.57064e-10	NaN	30.1653	NaN	169.769	NaN	38.8151	17.3562	8.24865	NaN	1.68561	30.2332	NaN	NaN	NaN	24.2918	17.0503	NaN	NaN	1.87821	14.5219	9.87024	NaN	37.593	NaN	NaN	NaN	32.2331	NaN	36.022	NaN	15.1057	NaN	18.142	NaN
A0A287BLX2	A0A287BLX2	FOLR1	Sus scrofa	Folate receptor alpha	8	10		folic acid transport	folic acid binding,folic acid transporter activity	FALSE	100	0.175045	7.5807	8.41879e-14	1.32389e-13	207	180.696	219.416	145.437	281.357	151.221	188.052	182.886	238.355	238.718	161.294	202.851	177.229	315.413	208.339	169.41	178.433	228.341	224.456	197.557	152.713	179.424	144.963	218.515	203.076	150.412	222.142	197.433	274.366	198.643	137.807	172.464	160.334	191.791
A0A287BM29	A0A287BM29	APOA4	Sus scrofa	Apolipoprotein A4	28	49	extracellular region	lipid transport,lipoprotein metabolic process	lipid binding	FALSE	100	0.168513	9.78102	6.94335e-17	1.9299e-16	708.445	677.283	624.405	660.769	983.871	822.045	857.689	994.36	1023.28	949.801	871.911	862.053	944.688	995.548	881.053	908.364	873.733	848.346	994.75	795.796	845.911	831.664	1148.1	646.885	944.555	837.747	764.87	994.993	1050.51	1067.94	769.878	767.293	911.124	859.191
A0A287BMP7;P50578	A0A287BMP7;P50578	AKR1A1	Sus scrofa	Aldo-keto reductase family 1 member A1	3	3	;	oxidation-reduction process;oxidation-reduction process	oxidoreductase activity;alcohol dehydrogenase (NADP+) activity	FALSE	18.8	1.07649	3.6908	3.41718e-11	5.79979e-11	NaN	NaN	NaN	91.9133	NaN	8.5035	NaN	NaN	NaN	22.0868	NaN	NaN	NaN	NaN	NaN	NaN	NaN	NaN	NaN	NaN	NaN	NaN	16.8897	5.93007	NaN	NaN	NaN	NaN	NaN	NaN	NaN	NaN	6.90296	NaN
A0A287BMT4	A0A287BMT4		Sus scrofa	Ig-like domain-containing protein	4	9				FALSE	100	0.640044	8.27311	1.09681e-15	2.23395e-15	612.393	816.977	723.05	13.933	786.727	566.596	513.928	27.0431	277.999	713.53	478.355	450.117	848.34	650.452	491.722	745.706	511.548	475.872	871.737	525.459	502.415	525.095	17.5186	840.02	530.526	729.046	551.177	779.554	28.1116	20.2632	562.25	543.161	535.508	1291.55
A0A287BN06	A0A287BN06		Sus scrofa	Pregnancy zone protein	92	214				FALSE	100	0.168406	12.3294	1.77464e-17	5.98128e-17	5784.02	2347.76	6014.43	5491.48	6520.37	5242.71	5132.93	4978.7	5623.85	5226.48	5102.88	4837.58	4737.6	6129.46	5157.45	4568.67	5109.79	5726.64	6646.32	5179.14	5050.31	5069.65	4815.81	2333.91	5215.34	4928.48	2479.09	5348.23	5133.7	5580.7	6959.85	5641.96	5175.54	5313.57
A0A287BN15;A0A5G2RJ62	A0A287BN15;A0A5G2RJ62	LOC110255312;LOC110255272	Sus scrofa	IF rod domain-containing protein	2	2	;	;	;	FALSE	27.7	0.981929	2.48268	2.20611e-09	4.25146e-09	NaN	NaN	NaN	NaN	NaN	1.74332	6.01167	NaN	NaN	NaN	8.58445	NaN	7.5556	3.83051	6.04999	NaN	NaN	NaN	NaN	NaN	NaN	2.51714	NaN	NaN	NaN	NaN	NaN	NaN	22.3596	NaN	NaN	NaN	NaN	NaN
A0A287BNF7;Q69DL0	A0A287BNF7;Q69DL0	C1QA	Sus scrofa	Complement C1q A chain;Complement C1q subcomponent subunit A	7	12	extracellular region,collagen trimer;extracellular region,collagen trimer	complement activation, classical pathway;complement activation, classical pathway,innate immune response	;	FALSE	100	0.106404	8.37425	1.91826e-16	4.69543e-16	314.72	311.023	357.43	340.213	272.114	292.662	335.782	334.336	316.185	276.554	343.977	331.372	366.677	348.101	346.975	361.817	328.903	306.137	322.866	331.758	340.74	316.872	312.418	356.181	378.221	317.623	338.517	348.375	321.138	283.301	224.354	322.199	327.022	380.493
A0A287BNX9	A0A287BNX9		Sus scrofa	Ig-like domain-containing protein	1	2				FALSE	99.1	0.40207	6.75236	2.73812e-14	4.47741e-14	172.557	85.9467	71.167	72.6839	88.4201	225.795	100.311	76.3381	198.399	60.9736	145.833	224.606	88.0066	184.13	108.102	95.8042	89.6921	90.6177	178.178	157.006	112.055	136.854	118.692	65.683	85.518	90.444	67.9085	119.099	79.4325	94.4866	80.4207	53.7664	130.062	75.8536
A0A287BP22	A0A287BP22	FSTL1	Sus scrofa	Follistatin like 1	5	5			calcium ion binding	FALSE	100	0.221491	4.49469	7.88952e-14	1.24281e-13	23.6732	26.9145	28.481	25.1673	23.0634	23.8303	19.516	25.9928	25.5845	28.1071	20.4523	23.7076	17.0481	23.3163	20.7595	27.5704	18.1649	30.318	26.703	24.6938	21.7214	18.5848	26.0725	25.6623	24.1463	28.972	21.7938	24.4511	23.3722	27.8535	11.8691	26.3133	24.2425	27.5039
A0A287BP58	A0A287BP58	LOC102166306	Sus scrofa	Alpha-fetoprotein isoform 1	15	16				FALSE	90.2	0.33718	5.81686	1.00797e-15	2.06924e-15	36.777	64.9619	42.7529	NaN	31.4678	43.1073	60.5711	76.199	104.443	81.0644	62.7087	45.231	46.9681	NaN	60.1197	56.3351	55.2774	67.2561	45.0923	64.3163	55.0959	56.4426	80.3392	72.0483	74.0945	73.5244	80.9637	37.12	30.5396	30.7065	35.9504	58.4932	55.5564	NaN
A0A287BPH0;P00998	A0A287BPH0;P00998	SPINK1	Sus scrofa	Serine peptidase inhibitor Kazal type 1;Serine protease inhibitor Kazal-type 1	3	3	;acrosomal vesicle,extracellular space	negative regulation of endopeptidase activity;regulation of acrosome reaction,negative regulation of serine-type endopeptidase activity	serine-type endopeptidase inhibitor activity;serine-type endopeptidase inhibitor activity	FALSE	100	0.330616	4.42762	1.77464e-17	5.98128e-17	7.769	30.4545	28.5678	9.81912	23.5983	25.8143	19.7138	14.4352	19.4404	23.5016	25.3177	15.7543	36.6729	22.9903	9.65315	21.407	16.8999	8.96277	21.3794	20.6988	20.8379	18.0282	24.7085	22.5436	22.3098	10.7605	15.8739	28.9409	25.1868	25.2826	32.2828	18.3126	14.2689	16.2935
A0A287BPP9	A0A287BPP9	PSMB1	Sus scrofa	Proteasome subunit beta	9	12	nucleus,cytoplasm,proteasome core complex	proteolysis involved in cellular protein catabolic process	threonine-type endopeptidase activity	FALSE	100	0.225722	5.52606	1.22089e-16	3.15657e-16	49.0714	63.4094	44.715	114.343	44.8429	53.207	51.101	56.0248	61.7258	56.863	41.6349	42.5248	41.9443	39.7187	50.6158	47.7759	49.0138	51.2074	40.3543	54.7885	46.2765	40.1999	61.9825	52.2233	53.1428	44.8073	55.3795	29.7209	40.8758	43.4023	25.1819	45.0582	50.0035	49.1909
A0A287BPX7	A0A287BPX7	YWHAB	Sus scrofa	Tyrosine 3-monooxygenase/tryptophan 5-monooxygenase activation protein beta	4	4				FALSE	38.4	0.473061	3.95904	0.000871817	0.00125286	NaN	NaN	NaN	46.8864	22.4846	25.3499	NaN	15.092	NaN	15.0413	12.929	NaN	NaN	NaN	16.205	16.4401	NaN	NaN	NaN	20.6661	NaN	NaN	8.3215	NaN	NaN	15.0041	14.3904	NaN	NaN	16.2127	NaN	26.4625	NaN	NaN
A0A287BQC8	A0A287BQC8	JCHAIN	Sus scrofa	Joining chain of multimeric IgA and IgM	7	15				FALSE	100	0.198171	11.1283	3.34901e-14	5.43034e-14	1806.24	2197.39	1692.25	1714	1751.78	1801.95	2171.25	1986.04	2408.73	3683.46	2186.93	2606.98	2575.69	2119.56	2186.02	1914.38	2256.85	1756.87	2294.7	2382.1	2094.3	2338.01	2360.43	2196.18	2246.12	2628.79	2636.44	1783.62	2505.9	2804.86	3127.6	2232.47	2217.47	3148.53
A0A287BQP1	A0A287BQP1	RBM25	Sus scrofa	RNA binding motif protein 25	1	1			RNA binding	FALSE	64.3	0.550697	5.76732	8.84311e-09	1.71288e-08	44.9509	58.5636	NaN	NaN	NaN	NaN	58.5733	162.021	56.8309	63.6671	64.7147	89.1088	29.5228	76.0119	65.0986	NaN	NaN	53.3897	52.8502	45.5248	NaN	57.6711	NaN	17.9648	43.0557	NaN	61.2455	NaN	48.93	NaN	NaN	78.8441	60.7073	NaN
A0A287BRD6	A0A287BRD6	CCL16	Sus scrofa	C-C motif chemokine	2	2	extracellular space	immune response,regulation of receptor activity,cell chemotaxis	chemokine activity	FALSE	97.3	0.335874	4.65399	1.08978e-09	2.07654e-09	18.6959	30.1629	29.7451	NaN	15.2532	29.0654	45.6543	NaN	29.6936	21.6133	41.7213	NaN	20.5295	25.6356	21.1303	33.6704	27.3291	20.8389	24.0578	36.3688	26.1414	18.6071	23.0855	17.332	21.751	24.8387	27.7842	37.4049	28.5412	35.9561	23.4474	22.5192	32.0713	41.3043
A0A287BRF1	A0A287BRF1	LOC110258309	Sus scrofa	C1q domain-containing protein	10	17				FALSE	100	0.105533	9.78938	1.9763e-15	3.8214e-15	880.981	927.065	820.938	800.461	886.054	853.622	903.315	939.369	961.947	972.54	882.677	955.993	865.768	816.937	855.179	1015.25	845.988	985.552	968.745	876.715	942.396	848.909	594.453	850.24	860.163	986.954	941.162	900.925	945.006	805.419	826.26	774.133	887.327	840.232
A0A288CFT0	A0A288CFT0	TPI1	Sus scrofa	Triosephosphate isomerase	15	19				FALSE	97.3	0.76716	4.88953	2.51435e-14	4.12701e-14	18.3539	49.2766	13.5812	170.582	72.7	83.6039	41.2426	55.0035	21.4335	46.8909	40.4846	13.9475	NaN	15.9082	31.4835	19.0763	30.5284	13.9913	19.291	37.7904	33.7435	38.0935	69.8662	14.1987	14.6936	29.6089	51.1357	18.3647	29.9942	15.8131	63.4868	11.4081	36.9601	19.0547
A0A288CFV1;A0A5G2R1D9;Q06AA9	A0A288CFV1;A0A5G2R1D9;Q06AA9	;UBE2D2;UBE2D2	Sus scrofa	Ubiquitin-conjugating enzyme E2 D3 isoform 2;Ubiquitin conjugating enzyme E2 D2;Ubiquitin-conjugating enzyme E2 D2	1	1	;;	;;protein K48-linked ubiquitination	ATP binding;;ubiquitin-protein transferase activity,ATP binding	FALSE	28.6	0.634913	4.10844	0.000615701	0.000902305	NaN	14.4737	NaN	52.8291	11.8209	NaN	NaN	NaN	NaN	13.3416	6.28709	NaN	NaN	NaN	13.8142	NaN	NaN	NaN	NaN	9.72392	NaN	NaN	60.3299	NaN	NaN	10.4096	14.1421	NaN	18.145	NaN	32.04	NaN	7.28618	NaN
A0A288CG53	A0A288CG53	SELL	Sus scrofa	L-selectin	5	7				FALSE	100	0.168427	6.01195	1.51236e-14	2.54463e-14	78.7695	60.5903	66.2523	60.0649	74.8115	77.2646	61.5789	61.3634	62.035	72.3125	61.0991	82.8595	70.0796	86.6468	74.0833	65.7108	65.9125	78.7889	59.6137	61.5442	67.2212	62.4853	69.1593	71.3075	54.7039	49.0287	56.7267	59.3805	101.468	72.0308	63.3897	48.1568	59.5291	63.3073
A0A480EEK4	A0A480EEK4	KATNAL2	Sus scrofa	Katanin p60 ATPase-containing subunit A-like 2	1	1				FALSE	21.4	0.907259	4.46705	6.42876e-06	1.10713e-05	NaN	5.93887	NaN	128.913	NaN	24.0771	NaN	15.1743	NaN	NaN	27.9871	NaN	NaN	NaN	18.4554	NaN	NaN	NaN	NaN	NaN	NaN	NaN	44.2896	NaN	NaN	9.56016	33.2583	NaN	NaN	NaN	NaN	NaN	NaN	NaN
A0A480I6I0	A0A480I6I0	COL14A1	Sus scrofa	Collagen alpha-1(XIV) chain	1	1				FALSE	43.8	0.359763	4.4208	1.94649e-13	3.01049e-13	33.601	NaN	10.9646	NaN	NaN	NaN	29.0742	25.1544	NaN	34.0071	21.5248	NaN	15.7189	30.7077	NaN	NaN	NaN	NaN	34.7671	NaN	NaN	19.2953	NaN	10.7495	39.4002	NaN	NaN	30.5883	17.8694	NaN	NaN	23.4598	19.9655	NaN
A0A480LAY6	A0A480LAY6	CTSA	Sus scrofa	Carboxypeptidase	1	1				FALSE	87.5	0.423298	4.70303	1.19736e-08	2.31527e-08	NaN	16.967	34.8335	19.3852	27.2185	11.2854	36.4805	21.5296	NaN	31.6672	22.4972	NaN	6.50947	32.8864	NaN	68.6498	16.9221	32.2164	47.553	NaN	34.8011	22.2041	NaN	20.5855	19.6845	5.96185	35.2412	42.2587	36.0545	32.626	15.2723	16.865	26.8807	NaN
A0A480MY39	A0A480MY39	C1H18orf54	Sus scrofa	Chromosome 1 C18orf54 homolog	1	1				TRUE	89.3	0.288147	7.86896	1.4775e-05	2.4952e-05	294.086	219.815	202.702	289.074	249.078	217.174	194.873	258.705	186.642	235.557	206.745	282.768	358.331	173.548	129.38	349.4	385.2	269.514	297.478	373.562	148.046	255.236	229.792	234.573	229.36	341.114	223.625	239.357	174.652	166.143	265.99	206.502	213.274	330.257
A0A480P2B4	A0A480P2B4	SERPINA5	Sus scrofa	Plasma serine protease inhibitor preproprotein	17	24				FALSE	100	0.146524	7.80228	1.77464e-17	5.98128e-17	245.22	230.618	173.989	290.51	184.085	236.739	225.255	216.574	235.491	170.251	213.214	249.342	226.786	182.85	219.539	206.284	222.609	243.626	258.421	211.993	228.702	237.696	254.824	200.146	203.889	240.148	241.784	222.766	258.216	215.987	171.856	220.535	216.339	322.268
A0A480P2S5	A0A480P2S5	SERPINC1	Sus scrofa	Antithrombin-III	45	112				FALSE	100	0.120343	11.683	1.77464e-17	5.98128e-17	3851.11	3117.19	3068.24	2734.21	4044.68	3920.89	3322.61	3323.79	3468.63	2635.46	3182.42	3591.29	3308.47	3753.79	3296.47	3409.23	3288.52	3802.56	2724.23	3247.75	3295.38	3225.53	3240.16	2961.62	2821.28	2720.13	3650.37	2923.95	4195.53	4026.39	3101.8	2779.38	3281.9	3841.62
A0A480PLY3	A0A480PLY3	YWHAZ	Sus scrofa	14-3-3 protein zeta/delta	6	7				FALSE	100	0.327722	4.75178	1.84189e-16	4.5302e-16	21.432	32.3063	13.8905	87.9286	26.2821	27.4789	21.6219	28.2634	29.0918	34.0953	28.6868	29.507	25.8316	22.2349	28.5065	21.9304	32.0002	29.8358	28.5427	21.6427	23.0884	37.0254	49.5528	28.9695	23.7476	28.2528	31.4698	17.2053	24.007	24.9966	22.3139	22.5243	26.8729	22.401
A0A480REB3	A0A480REB3	EHD3	Sus scrofa	EH domain containing 3	8	8				FALSE	23.2	0.689316	4.12535	1.07526e-05	1.83016e-05	NaN	NaN	NaN	76.5439	10.4512	8.15782	NaN	NaN	NaN	NaN	21.3684	NaN	26.8335	NaN	NaN	NaN	NaN	NaN	NaN	NaN	NaN	NaN	26.0296	NaN	NaN	NaN	24.7196	NaN	NaN	24.7935	15.026	NaN	NaN	NaN
A0A480RJC3	A0A480RJC3	C1R	Sus scrofa	Complement C1r	33	55				FALSE	100	0.0800098	8.52938	1.77464e-17	5.98128e-17	362.354	351.013	379.953	383.302	350.518	341.399	347.948	372.072	351.052	388.819	364.122	352.025	400.472	385.995	358.122	363.966	391.578	356.618	334.962	376.914	363.795	375.735	336.761	383.384	420.364	338.247	345.388	358.294	376.586	364.764	331.899	351.442	357.815	460.3
A0A480RK36	A0A480RK36	LPO	Sus scrofa	Lactoperoxidase	1	1				FALSE	25.9	0.496304	3.34837	1.63503e-07	3.03385e-07	NaN	NaN	NaN	10.4689	7.01209	NaN	NaN	8.03924	NaN	22.6049	NaN	NaN	NaN	9.79219	NaN	4.57859	NaN	NaN	NaN	NaN	NaN	NaN	NaN	NaN	NaN	NaN	NaN	NaN	NaN	NaN	NaN	7.55689	NaN	NaN
A0A480Y2E3	A0A480Y2E3	KNG1	Sus scrofa	Kininogen 1	38	69				FALSE	100	0.117374	11.0165	1.77464e-17	5.98128e-17	2392.62	1448.07	1918.31	1747.48	2691.36	2384.91	2075.54	1816.54	1889.41	1979.37	2013.96	2158.52	1849.93	2303.69	2074.82	2167.06	2039.37	1926.13	1982.78	2019.73	2054.42	2109.52	2390.73	1531.26	1979.38	1823.21	2046.42	2046.87	2823.08	1933.21	1838.6	1833.94	2040.83	2098.93
A0A481B9A6	A0A481B9A6	HRG	Sus scrofa	Histidine-rich glycoprotein	42	96				FALSE	100	0.223688	13.557	1.77464e-17	5.98128e-17	9884.35	9116.36	7107.68	9944.09	9317.1	9744.99	11763.8	15098.8	11631	12759.6	12190.3	11925	15505	11299	12134.5	15896.7	12262	11130	16433.5	12346.5	12029.4	11916.3	16291.6	10018.3	11231.7	12937.6	16550.2	13434	12546	9643.08	7204.33	10498.2	12320.6	10905.9
A0A481BCM9	A0A481BCM9	APOA2	Sus scrofa	Apolipoprotein A-II	4	7				FALSE	100	0.209477	8.07701	6.91882e-15	1.21884e-14	272.342	254.709	202.418	351.037	233.435	316.226	302.584	240.621	186.612	269.136	250.664	255.211	230.246	201.119	331.528	194.116	297.3	284.083	299.567	283.618	298.43	329.125	471.905	196.473	280.591	264.541	340.925	184.075	221.527	238.705	180.036	291.735	271.109	195.705
A0A481BLI9	A0A481BLI9	SERPIND1	Sus scrofa	Heparin cofactor 2	27	59				FALSE	100	0.0749706	11.401	1.77464e-17	5.98128e-17	2582.37	3065.82	2481.78	2612.01	2705.77	2702.66	2677.51	2577.44	2349.89	2650.16	2551.59	2354.95	2568.03	2970.32	2588.94	2764.69	2616.06	3092.95	2767.36	2719.81	2609.03	2709.26	3129.91	2835.46	2879.88	2748.11	2652.22	2717.93	3066.28	3292.95	2669.54	2672.89	2708.95	2588.68
A0A481CJY0	A0A481CJY0	HNRNPA2B1	Sus scrofa	Heterogeneous nuclear ribonucleoproteins A2/B1	2	3				FALSE	23.2	0.700751	4.1612	1.53969e-09	2.95227e-09	6.01937	NaN	NaN	NaN	5.21484	NaN	NaN	NaN	28.5546	NaN	NaN	NaN	NaN	20.4776	NaN	NaN	NaN	NaN	11.1422	18.8963	NaN	30.7784	NaN	NaN	NaN	NaN	72.4544	NaN	NaN	NaN	NaN	NaN	29.4998	13.079
A0A5G2Q7F8	A0A5G2Q7F8		Sus scrofa	Ig-like domain-containing protein	2	5				FALSE	100	0.555986	9.93772	2.53891e-12	3.97008e-12	1906.3	1603.62	738.534	213.309	301.087	2113.65	1151.87	1593.54	1493	1147.51	1240.45	2734.96	617.184	1194.79	1092.35	610.761	1186.75	1061.16	1495.86	1205.52	1145.67	1354.67	208.47	1558.87	1703.88	2564.37	562.065	1549.43	1693.49	223.457	199.902	2276.45	1231.57	367.376
A0A5G2Q7N6;A0A8W4FKQ6;Q29205	A0A5G2Q7N6;A0A8W4FKQ6;Q29205	RPL11;;RPL11	Sus scrofa	Ribosomal protein L11;60S ribosomal protein L11;Large ribosomal subunit protein uL5	1	1	;;nucleoplasm,nucleolus,cytoplasm,large ribosomal subunit,cytosolic large ribosomal subunit,cytoplasmic side of rough endoplasmic reticulum membrane	;;ribosomal large subunit assembly,translation,negative regulation of proteasomal ubiquitin-dependent protein catabolic process,protein localization to nucleus,positive regulation of signal transduction by p53 class mediator	;;RNA binding,structural constituent of ribosome,protein binding,rRNA binding	FALSE	95.5	0.675427	9.52828	6.13581e-13	9.4328e-13	823.482	989.454	317.251	200.11	648.065	1482.48	1064.59	1049.61	829.049	895.792	619.19	604.016	742.971	466.916	779.531	1536.11	NaN	3323.03	2398.13	717.775	397.304	713.207	904.335	2243.43	923.596	575.117	1429.55	1187.07	796.063	685.098	606.131	722.909	1656.22	1074.07
A0A5G2Q8I9	A0A5G2Q8I9	A2M	Sus scrofa	Alpha-2-macroglobulin	110	317				FALSE	100	0.100451	13.993	1.77464e-17	5.98128e-17	18888.1	17464	20483.2	16462.4	13157.7	17609.7	16118.8	17408.6	18888	16693.3	16199.5	19399.6	17743.8	14853.3	15967.7	19180.2	15969	17031.1	16591.8	15831.1	15946.6	15994.4	17826.4	18482.9	16282.1	15707.1	14751.5	18422	17709.3	17880.9	14977.1	15575.2	16094.1	16998.3
A0A5G2QBS5	A0A5G2QBS5	NXF1	Sus scrofa	Nuclear RNA export factor 1	1	1				FALSE	78.6	0.891132	7.536	3.67849e-07	6.71238e-07	155.319	245.428	118.426	1646.85	198.711	203.536	81.1596	222.988	NaN	233.905	134.832	81.1532	134.743	146.401	NaN	255.451	239.995	196.133	261.449	377.876	189.3	301.852	961.373	NaN	NaN	192.709	587.375	158.4	NaN	96.0813	423.182	NaN	94.1979	146.805
A0A5G2QC96	A0A5G2QC96	F13B	Sus scrofa	Coagulation factor XIII B chain	31	41				FALSE	100	0.148605	7.47954	1.77464e-17	5.98128e-17	175.377	212.023	172.034	137.876	155.968	167.91	190.337	176.213	195.296	225.044	171.353	213.04	200.879	190.369	180.331	179.279	171.899	152.577	183.089	181.794	178.49	170.152	240.254	208.901	182.563	194.572	213.903	164.11	203.777	133.119	137.487	179.15	167.167	193.545
A0A5G2QCL1	A0A5G2QCL1		Sus scrofa	Uncharacterized protein	105	254				FALSE	100	0.138617	10.7723	1.77464e-17	5.98128e-17	1813.28	1080.85	2169.14	2095.73	2280.16	1702.36	1749.49	1512.68	1629.88	1201.74	1753.81	1617.05	2011.3	1816.01	1764.75	1796.61	1765.89	1774.44	1431.72	1769.27	1751.7	1770.18	1803.97	1432.83	2062.05	1794.05	1445.19	1734.27	2048.12	1376.37	1771.93	2245.88	1773.63	1249.77
A0A5G2QD25	A0A5G2QD25	TMEM271	Sus scrofa	Transmembrane protein 271	1	1				TRUE	47.3	2.58517	5.10976	1.39659e-05	2.36192e-05	NaN	49.322	20.6909	NaN	NaN	NaN	48.1903	NaN	17.9708	21.4901	49.3384	20.8811	NaN	NaN	32.7966	NaN	37.6747	NaN	NaN	50.6449	63.4212	NaN	NaN	32.4586	NaN	NaN	70.9601	NaN	NaN	5.6367	26.1601	23.0475	41.3555	NaN
A0A5G2QDE0	A0A5G2QDE0	PROCR	Sus scrofa	Protein C receptor	3	3				FALSE	100	0.248521	4.74568	6.03213e-14	9.57702e-14	15.2328	29.2655	22.3175	21.3236	29.0067	18.8796	27.2545	18.9728	31.6886	36.6962	16.1208	46.5817	36.3488	22.4505	26.987	25.3536	30.2478	26.8598	23.4187	35.424	26.3234	23.1312	25.3792	27.7589	25.1774	37.0811	29.408	31.0712	28.5157	31.3231	23.2606	27.514	31.3309	45.8662
A0A5G2QE59	A0A5G2QE59	MASP1	Sus scrofa	MBL associated serine protease 1	8	8				FALSE	100	0.212221	4.68976	8.30622e-13	1.27883e-12	15.6893	17.1523	29.3969	41.561	32.187	24.7858	27.015	23.3082	24.9704	14.3252	27.7229	30.322	25.371	21.0844	23.6849	32.0523	21.3835	18.7399	27.7122	22.2936	23.5771	24.9281	19.6318	27.9321	21.6818	30.087	26.8041	27.355	22.3821	39.988	34.9813	24.2051	18.0822	28.1115
A0A5G2QEF4	A0A5G2QEF4	PLIN5	Sus scrofa	Perilipin 5	11	16				FALSE	100	0.164605	9.87316	9.11336e-16	1.88881e-15	811.066	877.761	1268.79	996.552	1013.07	811.917	907.401	1031.64	658.872	1151.28	949.455	778.35	1305.25	1349.54	949.012	860.108	963.845	855.666	864.154	835.786	942.79	933.066	855.864	861.334	1273.31	971.383	575.352	1058.22	1036.35	1103.12	843.832	1269.94	948.257	759.419
A0A5G2QFX9;Q9XSW3	A0A5G2QFX9;Q9XSW3	MBL2	Sus scrofa	Mannose binding lectin 2;Mannose-binding protein C	5	6	;collagen trimer,extracellular space	;complement activation, lectin pathway,complement activation, classical pathway	;calcium ion binding,mannose binding	FALSE	62.5	0.452215	6.30767	2.72996e-12	4.2753e-12	104.966	7.05938	118.243	134.178	NaN	105.635	54.6703	NaN	98.1598	NaN	50.4859	NaN	145.587	NaN	69.6511	141.633	57.9222	110.885	NaN	53.8747	49.986	59.777	112.399	18.0573	NaN	NaN	NaN	NaN	103.625	NaN	NaN	NaN	60.8385	106.581
A0A5G2QGC2	A0A5G2QGC2	EEF1A2	Sus scrofa	Eukaryotic translation elongation factor 1 alpha 2	1	1				FALSE	8	0.29804	5.48157	2.44639e-06	4.29818e-06	NaN	NaN	NaN	NaN	NaN	NaN	NaN	NaN	34.2542	NaN	NaN	NaN	NaN	NaN	NaN	NaN	NaN	NaN	NaN	41.5514	NaN	45.3017	NaN	NaN	NaN	NaN	61.4624	NaN	NaN	NaN	NaN	NaN	NaN	41.5677
A0A5G2QGZ1	A0A5G2QGZ1	FAM161A	Sus scrofa	FAM161 centrosomal protein A	1	1				FALSE	30.4	0.662344	2.32418	0.000589607	0.000866079	7.34324	NaN	6.28528	NaN	6.91497	NaN	NaN	NaN	NaN	1.98331	3.60305	6.48449	NaN	NaN	NaN	NaN	8.71664	NaN	4.0351	1.29364	NaN	NaN	NaN	NaN	NaN	NaN	8.74847	NaN	NaN	NaN	4.10673	NaN	NaN	8.78945
A0A5G2QHH9	A0A5G2QHH9	CFP	Sus scrofa	Complement factor properdin	10	18				FALSE	100	0.147053	8.74931	1.77464e-17	5.98128e-17	409.664	365.058	467.454	506.495	516.769	404.041	414.909	359.622	413.446	457.952	468.591	399.166	520.292	423.992	409.898	481.063	406.188	452.867	530.673	473.787	448.33	423.386	480.48	417.176	450.608	430.181	370.745	379.814	588.751	379.833	313.106	492.743	391.746	595.214
A0A5G2QHK1	A0A5G2QHK1	RSC1A1	Sus scrofa	Regulator of solute carriers 1	4	4				FALSE	29.5	1.39472	4.05978	2.1203e-05	3.54683e-05	NaN	NaN	NaN	207.971	NaN	6.25168	12.4963	NaN	NaN	8.12443	29.9029	NaN	NaN	NaN	NaN	NaN	NaN	NaN	NaN	20.5968	NaN	8.7883	51.7299	NaN	NaN	NaN	38.8826	NaN	NaN	NaN	23.7695	NaN	15.4575	NaN
A0A5G2QHQ5	A0A5G2QHQ5	SLC46A2	Sus scrofa	Solute carrier family 46 member 2	1	1				FALSE	50.9	0.29422	7.02756	5.33258e-07	9.65713e-07	NaN	NaN	218.579	113.745	108.11	104.769	103.33	NaN	NaN	148.585	NaN	114.684	NaN	NaN	NaN	220.909	NaN	80.1629	137.829	149.28	141.104	NaN	NaN	NaN	135.37	150.918	120.757	NaN	160.03	NaN	NaN	NaN	114.056	NaN
A0A5G2QI26;P15145	A0A5G2QI26;P15145	ANPEP	Sus scrofa	Alanyl aminopeptidase, membrane;Aminopeptidase N	13	15	;cytoplasm,plasma membrane,integral component of membrane	;angiogenesis,proteolysis,signal transduction,cell-cell signaling,regulation of blood pressure,cell differentiation,peptide catabolic process,viral entry into host cell	;virus receptor activity,zinc ion binding,peptide binding,metalloaminopeptidase activity	FALSE	100	0.273253	4.42488	2.15183e-12	3.35392e-12	18.5098	25.4979	19.1497	34.427	26.3598	15.5034	22.8951	19.8306	34.3687	21.5836	23.3596	14.2409	19.1165	24.8363	23.0001	20.9708	20.7189	17.5098	37.1684	21.4247	26.2224	24.7779	18.2101	28.688	22.4197	20.1916	18.4723	11.3044	17.8169	11.4231	18.4644	26.0103	20.9378	23.3673
A0A5G2QIE9;P50390	A0A5G2QIE9;P50390	TTR	Sus scrofa	Transthyretin	9	24	;extracellular space	;regulation of receptor activity,retinol metabolic process,thyroid hormone transport,purine nucleobase metabolic process	;hormone activity,small molecule binding,identical protein binding,thyroid hormone binding	FALSE	100	0.0939142	12.4445	3.51992e-17	1.07359e-16	6106.11	5550.88	4750.83	5927.91	5137.39	6395.39	5048.89	5394.33	5267.12	4682.06	5576.53	5875.26	5004.53	5730.62	5071.21	5650.3	5789.06	6175.28	6022.5	5481.13	4947.8	5505.66	6291.91	4968.35	4598.17	6275.23	6837.98	5274.57	5226.65	5576.93	5372.46	4997.8	5411.62	5628.77
A0A5G2QIU0	A0A5G2QIU0	CSF1R	Sus scrofa	receptor protein-tyrosine kinase	4	4				FALSE	91.1	0.330795	5.05787	8.20362e-11	1.44074e-10	NaN	28.5033	68.4379	37.4688	27.1084	21.2804	30.5423	30.9828	43.8961	26.1982	27.9154	37.3207	30.6958	36.1139	27.5606	39.5317	24.3642	NaN	43.8465	32.0026	26.26	30.7161	36.1967	31.2275	23.2033	NaN	25.9357	NaN	47.2842	34.4853	30.4772	17.9462	27.7944	41.4829
A0A5G2QJD5	A0A5G2QJD5	RGS6	Sus scrofa	Regulator of G protein signaling 6	1	1				FALSE	70.5	0.21326	6.71647	0.00126474	0.0017763	96.7138	124.162	79.9356	91.7163	75.7974	93.8831	103.019	75.001	120.38	NaN	113.022	108.923	103.28	NaN	NaN	NaN	133.104	110.678	112.986	NaN	NaN	102.419	125.741	130.031	68.3385	NaN	105.36	74.4664	93.5811	117.66	NaN	154.561	93.7104	NaN
A0A5G2QLU3	A0A5G2QLU3	KCTD11	Sus scrofa	Potassium channel tetramerization domain containing 11	1	1				FALSE	98.2	0.23485	6.6108	1.18915e-07	2.22082e-07	140.873	81.5993	124.865	149.887	87.2657	93.3768	88.2956	89.0225	110.194	84.9027	74.2129	99.6738	108.792	122.602	105.615	130.011	85.3741	100.205	101.404	117.057	90.2225	75.3665	84.1469	80.5985	108.686	107.748	135.122	164.04	79.0223	50.8404	94.5487	NaN	82.8858	116.914
A0A5G2QM19	A0A5G2QM19	PEPD	Sus scrofa	Peptidase D	15	15				FALSE	100	0.154826	6.19689	2.0717e-17	6.82294e-17	64.1908	98.5282	73.4808	64.6732	75.8633	85.0454	67.1087	70.4037	88.1399	65.5446	75.6332	78.2809	83.6363	96.3128	76.2668	65.5867	72.8829	61.1624	104.74	62.7424	75.2265	69.1297	70.147	99.893	86.8938	86.8574	65.2341	72.0052	92.0189	73.0951	65.9185	77.5988	70.9263	88.8
A0A5G2QMB0;P80031	A0A5G2QMB0;P80031	LOC100739163;GSTP1	Sus scrofa	glutathione transferase;Glutathione S-transferase P	4	5	;nucleus,mitochondrion	;metabolic process	;glutathione transferase activity	FALSE	54.5	0.703369	4.20503	3.45406e-10	6.38706e-10	NaN	24.5379	NaN	92.7865	21.3039	22.0264	10.1568	15.585	13.0148	NaN	16.2757	NaN	NaN	NaN	24.0799	NaN	10.2079	NaN	NaN	NaN	NaN	13.0653	40.5606	11.0947	16.4354	NaN	29.6497	NaN	25.5879	12.292	37.6665	NaN	13.2322	NaN
A0A5G2QMX5	A0A5G2QMX5		Sus scrofa	Ig-like domain-containing protein	4	4				FALSE	100	0.205767	4.9508	5.31671e-12	8.46459e-12	26.684	31.0073	28.229	32.778	32.7273	26.1541	32.9235	29.1817	32.0272	43.1142	31.7117	35.8213	23.3383	46.0233	29.0105	37.0606	28.4043	32.503	24.2496	36.0259	35.0412	26.4675	35.0455	40.7694	36.8566	33.4626	27.4065	35.6449	43.3785	34.1495	32.0339	35.8924	27.5091	32.4531
A0A5G2QNN2	A0A5G2QNN2	C1QB	Sus scrofa	Complement C1q B chain	8	16				FALSE	100	0.115063	8.62307	4.12294e-14	6.6316e-14	371.981	345.221	389.131	428.578	300.672	351.636	420.009	433.02	416.215	307.206	388.225	365.999	395.834	392.112	398.99	457.145	388.848	355.088	382.692	373.745	382.934	419.016	362.944	457.401	418.425	382.945	364.207	455.067	363.694	346.622	269.707	415.572	390.061	471.341
A0A5G2QNT7	A0A5G2QNT7	NAPA	Sus scrofa	NSF attachment protein alpha	1	1				FALSE	8	0.892083	4.48851	1.3409e-06	2.38403e-06	NaN	NaN	NaN	91.2295	NaN	NaN	NaN	NaN	NaN	NaN	NaN	NaN	NaN	NaN	NaN	NaN	NaN	NaN	NaN	NaN	NaN	5.92734	62.5721	NaN	NaN	NaN	NaN	NaN	NaN	NaN	16.7788	NaN	NaN	NaN
A0A5G2QP05	A0A5G2QP05	HAGH	Sus scrofa	Hydroxyacylglutathione hydrolase	3	3				FALSE	11.6	1.31951	4.20391	7.55555e-07	1.35871e-06	NaN	NaN	NaN	144.23	NaN	NaN	NaN	NaN	NaN	NaN	15.021	NaN	NaN	NaN	NaN	NaN	NaN	NaN	NaN	NaN	NaN	NaN	16.7148	NaN	NaN	NaN	25.5765	NaN	NaN	NaN	8.51852	NaN	NaN	NaN
A0A5G2QPP1	A0A5G2QPP1	CRP	Sus scrofa	C-reactive protein	12	18				FALSE	100	0.497735	8.09221	2.75276e-16	6.463e-16	220.144	55.0862	204.929	596.621	540.769	214.471	296.096	208.246	525.211	452.448	319.998	116.726	261.545	287.237	309.449	205.17	330.873	241.843	359.54	304.639	309.56	313.995	143.488	71.8232	317.713	148.2	180.689	125.8	328.538	103.21	139.5	332.503	282.502	197.111
A0A5G2QRW3	A0A5G2QRW3		Sus scrofa	Globin family profile domain-containing protein	23	57				FALSE	100	1.6579	12.5242	1.77464e-17	5.98128e-17	972.792	10430.6	1190.65	178708	11264.3	16109.6	15053.9	11804.9	1702.46	8025.95	15022.7	943.308	555.834	1715.7	14948.3	9624.91	14462.8	2604.77	3335.92	14510.7	14580.5	14369.9	47228.7	1917.2	1156.69	6010.88	48970.1	3506.25	11560.9	4412.37	16533.6	587.728	14967.5	3872.87
A0A5G2QSK4	A0A5G2QSK4	GDI2	Sus scrofa	Rab GDP dissociation inhibitor	9	10				TRUE	67.9	0.911327	3.65194	3.7092e-08	7.07683e-08	NaN	11.175	NaN	114.629	19.3058	25.4357	13.3018	30.3863	NaN	NaN	9.188	NaN	12.8198	NaN	9.31926	17.2775	15.9242	NaN	10.2616	NaN	8.28153	7.36515	18.4824	NaN	NaN	NaN	17.6766	NaN	7.79653	6.81181	17.6876	NaN	14.859	NaN
A0A5G2QTC8	A0A5G2QTC8	THBS4	Sus scrofa	Thrombospondin 4	31	44				FALSE	100	0.184506	8.14775	1.77464e-17	5.98128e-17	294.004	357.505	313.724	263.697	193.081	261.302	264.479	327.753	291.36	273.61	304.324	206.503	290.158	302.958	295.051	281.167	267.253	240.195	386.636	287.651	295.407	265.961	240.785	385.101	310.39	314.632	389.208	261.922	213.689	253.501	177.933	292.006	260.338	297.977
A0A5G2QUU1	A0A5G2QUU1	FGG	Sus scrofa	Fibrinogen gamma chain	34	79				FALSE	100	3.66308	6.81679	2.27877e-16	5.46684e-16	67.8107	67.1583	90.4923	129.677	70.8681	104.285	229.298	80.2241	82.6486	82.4049	223.496	58.9406	81.133	67.3771	228.687	108.617	226.954	59.1298	60.3689	220.757	224.581	219.758	107.086	61.4768	65.6746	85.3002	162.743	79.245	71.255	63.1317	73.0043	73.1518	222.136	80.3683
A0A5G2QV38;I3LQS0	A0A5G2QV38;I3LQS0	;HNRNPK	Sus scrofa	Heterogeneous nuclear ribonucleoprotein K	2	3	;	;regulation of transcription from RNA polymerase II promoter,RNA processing	;DNA binding,RNA binding	FALSE	8	0.595655	3.48255	3.41505e-07	6.24119e-07	NaN	NaN	NaN	22.0434	NaN	NaN	NaN	NaN	7.47958	NaN	NaN	NaN	NaN	NaN	NaN	NaN	NaN	NaN	NaN	NaN	NaN	NaN	NaN	NaN	NaN	NaN	19.1559	NaN	NaN	NaN	NaN	NaN	NaN	NaN
A0A5G2QVE1	A0A5G2QVE1	LOC100739218	Sus scrofa	Kazal-like domain-containing protein	1	1				FALSE	71.4	0.301521	5.25115	1.56103e-10	2.8091e-10	NaN	23.4074	37.6959	29.2199	55.6677	68.2326	35.9094	42.0537	33.7142	18.0855	32.7952	NaN	34.0809	NaN	NaN	47.3661	31.2405	35.7416	29.0072	31.1239	NaN	63.7835	52.3021	18.5422	33.8248	NaN	42.3588	71.1533	NaN	23.3215	59.4971	NaN	28.9734	NaN
A0A5G2QWV3;F1RQM2	A0A5G2QWV3;F1RQM2	PGM3	Sus scrofa	Phosphoacetylglucosamine mutase	1	1	;cytosol	;carbohydrate metabolic process,UDP-N-acetylglucosamine biosynthetic process,protein N-linked glycosylation,protein O-linked glycosylation,spermatogenesis,glucose 1-phosphate metabolic process,hemopoiesis	;magnesium ion binding,phosphoacetylglucosamine mutase activity,phosphoglucomutase activity	FALSE	55.4	0.835522	9.23396	7.67807e-05	0.000123348	NaN	NaN	NaN	3761.38	399.611	641.168	549.17	566.769	NaN	324.404	622.478	NaN	NaN	NaN	NaN	NaN	NaN	NaN	236.069	639.571	712.754	762.169	1362.4	NaN	NaN	310.259	1899.28	NaN	516.382	213.395	732.239	NaN	597.785	182.294
A0A5G2QXR3	A0A5G2QXR3		Sus scrofa	Plasminogen	58	128				FALSE	100	0.0605299	11.6425	1.77464e-17	5.98128e-17	2952.15	3083.82	3146.55	2978.17	3389.65	2964.36	3084.84	2849.17	3139.88	3094.77	3072.47	3117.18	3386.96	3215.48	3098.26	3075.75	3113.24	3232.21	2949.24	3222.97	3140.68	3157.39	3179.2	3093.7	3332.82	3144.15	3286.55	3284.34	3355.09	3415.4	3279.87	3555.97	3087.38	3133.51
A0A5G2QXT5	A0A5G2QXT5		Sus scrofa	Ig-like domain-containing protein	14	41				FALSE	100	0.349229	12.7486	1.77464e-17	5.98128e-17	7674.31	8227.76	3086.67	6966.03	6607.85	8764.59	7127.19	5894.05	4784.83	5088.21	7210.94	7189.3	7912.99	4979.99	6644.46	3252.9	7179.67	5584.07	7403.3	7364.37	6666.81	7436.92	7745.82	7903.55	2103.29	2532.01	8507.57	7420.29	6520.16	4096.5	8177.21	2084.17	7633.19	17961.4
A0A5G2QXX3	A0A5G2QXX3	QSOX1	Sus scrofa	Sulfhydryl oxidase	28	47				FALSE	100	0.0805417	7.98903	1.77464e-17	5.98128e-17	255.528	244.764	267.669	247.828	281.696	253.637	253.59	216.905	254.489	285.295	255.14	275.229	293.628	256.627	259.722	252.923	256.983	224.649	238	245.673	263.652	247.03	254.538	238.533	264.809	223.549	213.172	273.091	252.062	261.787	260.747	248.042	249.192	294.372
A0A5G2QZ66	A0A5G2QZ66	PARVB	Sus scrofa	Parvin beta	5	6				FALSE	42.9	0.611049	3.78825	7.58157e-09	1.46927e-08	4.51699	6.86273	NaN	46.3309	22.0679	NaN	NaN	5.58636	22.8323	12.9353	NaN	20.813	NaN	NaN	NaN	NaN	NaN	NaN	NaN	22.2448	NaN	3.8101	38.5783	NaN	14.3485	NaN	NaN	NaN	12.7379	15.1161	45.593	NaN	19.398	NaN
A0A5G2QZC6	A0A5G2QZC6		Sus scrofa	UBC core domain-containing protein	4	4				FALSE	30.4	0.990552	4.7733	1.63113e-06	2.88887e-06	9.65252	22.1001	NaN	201.783	NaN	22.8357	NaN	19.8305	NaN	NaN	NaN	NaN	NaN	NaN	NaN	NaN	NaN	23.7768	NaN	28.534	26.3566	19.917	77.3401	NaN	NaN	NaN	51.9823	NaN	NaN	NaN	44.7203	NaN	NaN	NaN
A0A5G2QZN1;Q8MJ30	A0A5G2QZN1;Q8MJ30	QDPR	Sus scrofa	Quinoid dihydropteridine reductase;Dihydropteridine reductase	3	3	;cellular_component	;tetrahydrobiopterin biosynthetic process,oxidation-reduction process	;6,7-dihydropteridine reductase activity	FALSE	17	0.755626	4.18685	1.39696e-05	2.36253e-05	NaN	NaN	NaN	76.4057	NaN	17.3759	NaN	NaN	NaN	NaN	6.96854	NaN	NaN	6.91974	NaN	NaN	NaN	NaN	NaN	NaN	NaN	NaN	21.7456	NaN	NaN	NaN	NaN	NaN	NaN	NaN	NaN	NaN	NaN	NaN
A0A5G2QZN6;Q5XLD3	A0A5G2QZN6;Q5XLD3	CKM	Sus scrofa	creatine kinase;Creatine kinase M-type	18	25	;extracellular space	;response to heat,phosphorylation	;creatine kinase activity,ATP binding	FALSE	77.7	0.904816	5.616	6.06793e-16	1.30898e-15	NaN	114.366	14.0663	NaN	171.68	174.063	54.9298	88.4994	9.43284	119.038	60.0526	NaN	8.71488	NaN	55.2738	21.8463	53.99	12.7576	16.0606	58.5809	67.5487	61.164	31.0959	15.8524	NaN	78.3484	37.4511	17.9336	29.48	NaN	29.5789	24.2831	57.7565	27.4843
A0A5G2R0E8	A0A5G2R0E8	MAN2B1	Sus scrofa	Alpha-mannosidase	10	11				FALSE	100	0.231222	5.5814	1.40491e-15	2.79787e-15	30.8731	62.7212	52.2319	38.2974	34.873	27.2202	56.7461	64.7182	79.7467	61.3057	49.0742	24.5395	51.5423	61.2574	61.1858	59.2602	38.0595	50.9877	68.6836	43.5888	45.7853	54.7558	50.7427	75.3422	37.7226	32.276	57.3779	47.7278	46.9396	35.8705	38.6255	41.9902	45.5362	61.1926
A0A5G2R0F5	A0A5G2R0F5	ADK	Sus scrofa	Adenosine kinase	4	4				FALSE	7.1	1.23371	3.50195	0.000751447	0.00108917	NaN	NaN	NaN	71.4314	NaN	NaN	NaN	NaN	NaN	NaN	NaN	NaN	NaN	NaN	NaN	NaN	NaN	NaN	NaN	NaN	NaN	NaN	NaN	NaN	NaN	NaN	8.52915	NaN	NaN	NaN	NaN	NaN	NaN	NaN
A0A5G2R0H2	A0A5G2R0H2	MRC1	Sus scrofa	Mannose receptor C-type 1	11	11				FALSE	100	0.179739	5.8092	6.02985e-09	1.16889e-08	58.4574	42.6439	78.1543	51.4903	60.4666	55.2313	52.2072	49.4912	51.4744	57.0473	58.4676	60.5387	42.3704	54.8421	56.7266	71.1197	52.1206	51.7078	59.9771	55.2015	61.9512	58.3398	43.2167	52.2319	61.5767	68.2358	54.966	55.3588	63.2533	77.3315	75.6762	47.2603	53.3712	80.3071
A0A5G2R0H3	A0A5G2R0H3	DKK3	Sus scrofa	Dickkopf WNT signaling pathway inhibitor 3	1	1				FALSE	45.5	0.744833	2.4769	5.51269e-13	8.47294e-13	4.90546	NaN	1.445	NaN	NaN	NaN	NaN	7.07495	NaN	5.03412	NaN	2.27828	NaN	5.51337	7.66757	7.46442	NaN	9.91506	2.25822	NaN	NaN	4.57855	3.92104	NaN	9.16534	10.4401	NaN	NaN	NaN	5.4853	NaN	NaN	NaN	NaN
A0A5G2R0I4	A0A5G2R0I4	ORM1	Sus scrofa	Lipocalin/cytosolic fatty-acid binding domain-containing protein	19	63				FALSE	100	0.197538	13.6883	1.77464e-17	5.98128e-17	16448	14433.3	13512.2	11769.3	17563.6	15135	11392.6	9458.72	8985.98	14244.2	13419.6	11035.4	14096.5	14781	10965.5	16602.3	14707	16260.2	11278.7	14569.3	10736	14434.9	14720.3	12675.6	11083.3	10216.7	12081.6	15190.9	21427.5	13289	14922.9	10291.4	13998.6	15505.2
A0A5G2R1I2	A0A5G2R1I2	PSMA4	Sus scrofa	Proteasome subunit alpha type	10	11				FALSE	100	0.215661	5.77104	1.63906e-13	2.54149e-13	60.1659	61.8547	63.4493	117.451	43.4301	82.408	65.8777	66.5558	59.244	49.8362	54.4144	64.244	48.2012	62.2867	52.2129	49.5969	51.8934	57.2853	45.1505	60.1323	50.2166	49.0978	75.1092	60.147	49.3403	76.863	91.0268	36.4577	48.58	38.187	48.9254	57.0909	45.1056	63.3216
A0A5G2R1P5	A0A5G2R1P5	GRN	Sus scrofa	Granulin	6	7				FALSE	100	0.231353	4.30271	3.53879e-16	8.07996e-16	15.8702	17.2172	24.8665	19.291	17.3474	24.9547	19.8975	19.9782	29.481	34.0837	18.5121	23.1395	19.8622	27.1077	16.5399	22.1529	17.0985	24.3416	12.8752	22.8354	25.9185	25.2442	16.9087	23.9331	10.2353	20.6238	16.2545	17.3826	29.1198	32.1073	19.7319	16.713	22.9875	33.6752
A0A5G2R2I8	A0A5G2R2I8	EGFR	Sus scrofa	Receptor protein-tyrosine kinase	2	2				FALSE	64.3	0.457908	3.50442	2.22989e-05	3.72497e-05	10.3223	13.0014	NaN	NaN	10.9797	8.62796	19.959	5.4739	16.9998	6.49051	NaN	NaN	NaN	18.1859	NaN	7.43865	13.6683	10.785	NaN	3.12234	NaN	25.4151	11.5538	3.62884	14.2068	15.3401	NaN	7.17392	NaN	12.0626	27.3986	11.9693	23.2716	NaN
A0A5G2R2T5	A0A5G2R2T5	SLC3A2	Sus scrofa	Solute carrier family 3 member 2	7	7				FALSE	99.1	0.221933	4.73437	4.14915e-09	8.03674e-09	28.5805	23.8548	22.8713	NaN	35.2484	37.3422	28.5631	23.7327	23.1923	37.4191	28.0965	23.8058	29.28	41.8867	22.9885	35.4495	27.7945	27.7062	27.506	30.0183	28.9001	25.0077	27.141	23.6861	20.6483	16.7153	27.2212	25.3746	39.3064	30.7193	19.4054	15.8602	25.9108	35.1581
A0A5G2R2W7	A0A5G2R2W7		Sus scrofa	EGF-like domain-containing protein	2	2				FALSE	93.8	0.351524	4.40044	8.95949e-11	1.57886e-10	37.11	15.0175	NaN	27.5502	10.1993	22.1335	18.7638	24.1798	19.4836	22.36	31.8791	12.948	39.5381	22.8796	17.1068	28.8294	20.0317	22.416	35.5166	15.8198	28.1522	30.3718	29.0927	48.1074	29.8224	27.8521	21.1875	NaN	23.5297	11.7294	14.3212	15.6026	23.3371	18.2338
A0A5G2R4K9	A0A5G2R4K9	PITPNM3	Sus scrofa	PITPNM family member 3	1	1				FALSE	8	0.691043	3.39067	1.38142e-05	2.3369e-05	NaN	NaN	NaN	NaN	NaN	NaN	NaN	NaN	NaN	NaN	NaN	8.25559	NaN	NaN	NaN	NaN	NaN	NaN	NaN	NaN	NaN	8.17169	NaN	NaN	NaN	NaN	NaN	NaN	NaN	NaN	NaN	NaN	NaN	NaN
A0A5G2R4Y0	A0A5G2R4Y0	RIBC1	Sus scrofa	RIB43A domain with coiled-coils 1	1	1				TRUE	72.3	0.434165	4.19241	6.03885e-09	1.17064e-08	NaN	18.9328	NaN	21.013	NaN	14.8206	27.3947	NaN	14.7231	12.474	22.2152	NaN	NaN	NaN	25.2905	26.725	NaN	NaN	11.0639	NaN	32.5901	NaN	19.6036	NaN	NaN	NaN	NaN	19.2835	27.5436	7.97487	10.2286	NaN	26.2487	NaN
A0A5G2R4Y9	A0A5G2R4Y9	PSMB6	Sus scrofa	Proteasome 20S subunit beta 6	1	1				FALSE	18.8	0.500047	3.22669	0.000201268	0.000311299	NaN	12.5048	NaN	14.5779	5.23232	NaN	NaN	NaN	NaN	NaN	NaN	NaN	NaN	NaN	NaN	NaN	NaN	NaN	NaN	NaN	NaN	NaN	NaN	6.23455	NaN	NaN	NaN	NaN	NaN	NaN	NaN	NaN	NaN	NaN
A0A5G2R599	A0A5G2R599	FUCA2	Sus scrofa	Alpha-L-fucosidase	7	8				FALSE	99.1	0.300499	5.5646	4.80154e-12	7.62304e-12	33.7384	49.4943	60.531	11.1267	43.7789	27.3368	68.0614	75.5801	53.2756	78.4165	48.2	68.5391	60.6401	5.94593	34.7063	61.3781	44.4455	44.6646	72.5144	51.5816	57.1255	43.8463	50.3971	45.4866	40.8156	40.797	63.6969	29.0799	38.2814	44.6481	50.7122	30.0295	44.1115	48.1615
A0A5G2R5A7;A0A5G2RLJ0	A0A5G2R5A7;A0A5G2RLJ0		Sus scrofa	L1 transposable element RRM domain-containing protein	1	1	;	;	;	FALSE	48.2	0.269255	7.23753	0.000278259	0.000424225	NaN	93.314	NaN	NaN	NaN	107.498	160.288	NaN	115.607	NaN	140.3	128.144	160.77	189.634	185.179	NaN	NaN	85.38	250.282	NaN	150.519	NaN	206.876	NaN	87.1655	NaN	NaN	182.457	NaN	NaN	NaN	NaN	99.0597	NaN
A0A5G2R6J1	A0A5G2R6J1	PSMB2	Sus scrofa	Proteasome subunit beta	3	3				FALSE	100	0.2874	5.49254	1.77464e-17	5.98128e-17	43.1828	49.2334	42.2118	130.926	39.0538	54.4493	53.674	63.6	50.837	45.8911	56.9768	43.7406	57.2338	32.7011	33.6733	38.4912	39.7533	52.5666	33.5121	38.3383	49.0555	48.099	63.0119	68.5	55.3362	59.1373	50.6016	42.7956	38.3196	43.3037	38.4563	56.4063	37.9405	51.0476
A0A5G2R7M3	A0A5G2R7M3	ITIH4	Sus scrofa	Inter-alpha-trypsin inhibitor heavy chain 4	59	141				FALSE	100	0.205653	12.7741	3.37398e-17	1.03526e-16	9049.53	7196.09	10748.8	5650.62	10288.3	8486.72	6848.85	6888.19	6776.15	10108.7	7027.17	7459.47	8224.07	6591.91	6964.3	5023.06	7085.33	6730.49	7703.51	7013.56	6785.42	6907.9	5272.44	10542.3	10538.1	6344.43	4793.37	6044.46	4905.15	7801.78	10042.8	9061.08	6908.06	5758.69
A0A5G2R7R6	A0A5G2R7R6	ENO3	Sus scrofa	phosphopyruvate hydratase	1	1				FALSE	26.8	0.487531	4.71856	2.49649e-11	4.18655e-11	NaN	31.0506	NaN	NaN	30.1963	35.5852	NaN	35.19	NaN	14.4862	NaN	NaN	NaN	NaN	NaN	NaN	15.1822	NaN	NaN	6.19334	NaN	17.1437	NaN	NaN	NaN	12.8818	NaN	NaN	NaN	NaN	NaN	NaN	NaN	NaN
A0A5G2R840	A0A5G2R840	HABP2	Sus scrofa	Hyaluronan binding protein 2	16	18				FALSE	100	0.10312	6.83831	1.77464e-17	5.98128e-17	105.524	120.984	107.77	105.164	101.465	100.002	117.693	125.867	117.646	117.91	117.209	123.056	104.622	110.157	112.571	134.951	109.943	100.253	114.182	110.622	125.431	116.38	120.206	104.978	115.188	105.503	123.709	112.9	124.08	133.702	124.436	129.31	112.554	120.186
A0A5G2R860	A0A5G2R860	MMP2	Sus scrofa	Matrix metallopeptidase 2	3	3				FALSE	92.9	0.328984	3.80939	4.77907e-14	7.64621e-14	10.6355	20.8953	13.1447	2.8814	15.5832	15.36	13.0885	12.5734	10.3861	14.6641	9.55957	13.877	14.3039	NaN	15.224	13.4762	14.4075	17.4363	8.44031	11.6331	8.05223	16.5197	11.2602	18.5117	11.8297	20.6564	14.6056	11.4607	21.5349	17.8523	16.9463	16.3036	11.7948	15.3549
A0A5G2R8T9	A0A5G2R8T9	C6	Sus scrofa	Complement component C6	34	50				FALSE	100	0.0942516	8.91558	4.5196e-17	1.33121e-16	538.806	479.459	408.168	474.659	534.1	533.503	497.759	450.34	463.332	550.469	480.878	452.321	394.09	579.993	476.104	416.187	477.532	458.428	464.24	478.013	524.275	469.535	471.309	472.876	476.17	466.636	469.964	461.999	379.265	461.137	520.078	489.367	459.678	520.43
A0A5G2R924	A0A5G2R924	SPTA1	Sus scrofa	Spectrin alpha, erythrocytic 1	8	8				FALSE	25.9	0.608489	4.25627	3.14287e-05	5.19865e-05	NaN	NaN	NaN	47.7611	NaN	NaN	21.9699	NaN	NaN	NaN	NaN	NaN	NaN	NaN	NaN	NaN	NaN	NaN	NaN	NaN	NaN	17.1252	19.7346	NaN	8.07833	NaN	29.7191	NaN	NaN	NaN	20.2303	NaN	NaN	NaN
A0A5G2R9V1	A0A5G2R9V1		Sus scrofa	Ig-like domain-containing protein	1	2				FALSE	100	1.01483	7.36472	2.12832e-14	3.52033e-14	129.375	102.688	92.8989	176.805	62.0524	124.401	214.713	427.791	90.7703	194.239	216.672	145.769	118.503	37.0891	205.7	196.023	220.535	82.0489	132.435	219.591	209.933	228.253	385.407	64.3231	120.403	1759.28	107.337	110.903	121.452	170.848	299.277	335.447	210.805	363.922
A0A5G2RAJ8	A0A5G2RAJ8	ME1	Sus scrofa	Malic enzyme	1	2				FALSE	100	0.339103	3.83168	2.30919e-14	3.80495e-14	11.5603	7.54683	7.22546	21.1446	13.633	8.10904	12.7858	27.372	18.1685	8.00661	12.2613	22.6793	10.1224	10.3068	13.8773	13.8128	13.6433	16.3295	15.9799	13.4975	16.6017	22.393	22.2202	12.3159	15.1313	12.7251	18.8833	20.9398	6.97892	10.3597	10.3833	9.64851	5.59244	21.9342
A0A5G2RAY1;Q29545	A0A5G2RAY1;Q29545	INHCA;ICA	Sus scrofa	Inhibitor of carbonic anhydrase	50	107	;extracellular space	;negative regulation of catalytic activity	;enzyme inhibitor activity	FALSE	100	0.0634464	10.0707	1.77464e-17	5.98128e-17	989.464	1132.55	1017.55	995.641	1010.42	974.016	1034.52	1170.59	1202.15	1117.39	1055.49	1005.47	1013.86	1141.86	1066.21	1077.7	1080.65	1062.68	1156.35	1088.6	1055.06	1074.28	1146.38	1098.22	1030.45	1074.14	1202.4	1066.61	1114.36	1175.07	1066.08	1001.87	1027.35	1068.03
A0A5G2RBD3	A0A5G2RBD3	KRT18	Sus scrofa	Keratin 18	1	1				TRUE	73.2	1.09596	5.37221	1.10244e-09	2.10115e-09	NaN	NaN	NaN	30.4971	16.3846	78.607	188.317	38.0646	NaN	23.7293	36.8631	NaN	22.9214	41.4717	177.411	NaN	NaN	96.4222	NaN	18.8482	190.622	32.7129	19.3889	17.2839	5.59755	27.5981	NaN	NaN	40.5739	10.0826	10.7581	NaN	45.7969	67.4013
A0A5G2RD43	A0A5G2RD43	LOC110256000	Sus scrofa	Amine oxidase	29	81				FALSE	100	0.201537	11.7415	1.77464e-17	5.98128e-17	4457.23	4184.31	2289.21	3363.67	4925.29	4404.05	3444.24	3537.54	3977.17	4299.79	3472.55	4289.81	3202.76	3108.82	3459.82	2433.86	3369.01	3210.2	3777.13	3351.39	3379.07	3401.51	3548.76	4155.84	3498.51	3558.77	4562.52	1605.87	3766.59	2817.07	3332.18	3776.76	3426.56	3215.21
A0A5G2RE07	A0A5G2RE07	PYGM	Sus scrofa	Alpha-1,4 glucan phosphorylase	4	4				TRUE	34.8	0.543272	3.55186	3.19113e-13	4.91132e-13	NaN	9.93596	NaN	NaN	16.6933	13.1039	10.4998	11.3084	NaN	NaN	NaN	NaN	NaN	NaN	7.60623	5.34637	NaN	NaN	NaN	NaN	12.6989	NaN	NaN	NaN	NaN	NaN	7.23913	NaN	NaN	3.66253	NaN	NaN	11.7856	NaN
A0A5G2RG07	A0A5G2RG07		Sus scrofa	Uncharacterized protein	1	2				FALSE	100	0.384556	5.98811	5.69345e-11	9.85754e-11	53.1936	61.6739	62.7074	61.008	128.73	61.894	63.0773	99.2553	62.7441	249.292	60.1433	76.1862	88.1332	79.8449	56.037	67.07	50.6902	50.0894	44.8252	40.9402	81.2075	48.7846	49.9501	58.3732	72.1431	59.0496	73.25	68.0424	125.031	53.6024	47.7625	62.1828	63.3464	76.5426
A0A5G2RIA8;Q9GLP2	A0A5G2RIA8;Q9GLP2	PROC	Sus scrofa	Protein C, inactivator of coagulation factors Va and VIIIa;Vitamin K-dependent protein C	23	42	;extracellular space,endoplasmic reticulum,Golgi apparatus	;proteolysis,blood coagulation,negative regulation of blood coagulation,negative regulation of apoptotic process,negative regulation of inflammatory response,negative regulation of coagulation,positive regulation of establishment of endothelial barrier	;serine-type endopeptidase activity,calcium ion binding	FALSE	100	0.0802583	8.96947	1.77464e-17	5.98128e-17	505.494	618.465	486.373	458.412	461.777	491.596	512.845	576.314	521.117	494.659	498.481	509.666	529.884	465.481	481.732	504.026	476.117	558.615	453.003	478.795	507.489	510.379	465.597	574.17	443.268	484.27	526.499	494.541	524.455	515.457	462.005	496.78	485.092	461.14
A0A5G2RLP2	A0A5G2RLP2	LGALS3BP	Sus scrofa	Galectin-3-binding protein	23	57				FALSE	100	0.361826	8.95739	1.77464e-17	5.98128e-17	380.92	718.11	571.998	733.469	428.909	359.006	513.621	555.009	519.454	831.427	534.553	380.345	618.702	486.912	525.662	593.849	507.203	471.074	619.697	503.639	502.494	477.212	530.973	635.605	579.056	438.057	430.074	289.386	596.095	502.269	425.6	726.753	524.332	477.755
A0A5G2RLZ5;P03974	A0A5G2RLZ5;P03974	VCP	Sus scrofa	Transitional endoplasmic reticulum ATPase	16	18	;nucleus,cytoplasm,endoplasmic reticulum,cytosol,site of double-strand break	;double-strand break repair,autophagy,cellular response to DNA damage stimulus,proteasomal protein catabolic process,macroautophagy,protein ubiquitination,protein N-linked glycosylation via asparagine,translesion synthesis,ER-associated ubiquitin-dependent protein catabolic process,endosome to lysosome transport via multivesicular body sorting pathway,ERAD pathway,proteasome-mediated ubiquitin-de…	;ATP binding,lipid binding,ATPase activity	TRUE	54.5	0.756466	3.92127	7.6881e-09	1.48986e-08	NaN	NaN	NaN	97.5705	8.83215	10.9689	13.6695	10.3559	NaN	NaN	12.6563	NaN	NaN	NaN	5.84915	9.76136	18.8162	13.7358	NaN	15.5175	13.4718	14.519	28.8163	12.2399	NaN	19.2051	28.3889	NaN	11.8541	15.1804	13.4354	NaN	15.6849	28.1035
A0A5K1U1D1	A0A5K1U1D1	FHL1	Sus scrofa	Four and a half LIM domains 1	6	7				FALSE	68.8	0.471368	5.09903	1.77464e-17	5.98128e-17	NaN	35.683	NaN	83.8228	65.0729	30.0103	33.842	17.8125	7.77838	40.4342	39.0222	18.9263	58.7541	54.6105	NaN	NaN	36.5602	NaN	NaN	30.5802	40.1345	25.949	92.1479	NaN	31.1157	NaN	19.4433	NaN	31.8679	NaN	103.835	28.4872	28.3059	75.5289
A0A5K1UB60	A0A5K1UB60	ALCAM	Sus scrofa	Activated leukocyte cell adhesion molecule	2	2				TRUE	90.2	0.389927	3.9338	4.40747e-09	8.53915e-09	18.3911	NaN	NaN	NaN	25.4222	13.9049	19.2236	11.0087	12.5232	17.6843	24.0399	13.3669	15.5066	15.902	17.3171	11.1885	12.2402	18.6633	14.2049	15.0195	NaN	29.6806	13.0096	17.9781	14.0856	16.5889	4.47175	17.2582	21.6829	9.21745	34.2327	14.051	7.79206	15.5448
A0A5K1UBC7;Q866Y3	A0A5K1UBC7;Q866Y3	PGLYRP2	Sus scrofa	N-acetylmuramoyl-L-alanine amidase	20	30	;extracellular region,membrane	;pattern recognition receptor signaling pathway,peptidoglycan catabolic process,detection of bacterium,defense response to Gram-positive bacterium	;zinc ion binding,N-acetylmuramoyl-L-alanine amidase activity,peptidoglycan receptor activity,peptidoglycan binding	FALSE	100	0.0868574	7.50662	3.9322e-17	1.18081e-16	172.709	212.017	155.49	170.471	180.579	194.05	190.425	199.884	170.943	198.436	177.319	143.808	180.912	191.253	167.94	177.826	178.945	202.255	165.136	177	190.059	187.989	216.399	187.268	186.099	178.86	185.924	193.266	196.483	188.806	188.495	168.276	184.399	167.983
A0A5K1UHA8	A0A5K1UHA8	ART3	Sus scrofa	NAD(P)(+)--arginine ADP-ribosyltransferase	6	7				FALSE	100	0.18994	5.78278	8.25907e-17	2.24404e-16	67.4323	64.2223	56.9675	51.857	71.2111	69.9517	58.2654	55.6406	61.2421	67.1635	59.8274	50.9156	49.381	62.9473	61.2751	43.3486	48.7176	69.0222	74.577	56.116	57.7976	48.9748	56.4265	76.7684	47.2275	43.3141	58.3804	75.6654	76.3415	63.4266	51.063	33.1645	55.8378	62.1152
A0A5K1UYV7	A0A5K1UYV7	ATRN	Sus scrofa	Attractin	1	1				FALSE	72.3	0.41098	3.96265	1.22764e-07	2.29124e-07	NaN	NaN	NaN	7.20466	NaN	21.1122	18.9613	18.8334	NaN	20.5464	14.6812	10.7661	15.3142	17.611	NaN	12.1705	17.1613	19.4755	13.8238	NaN	NaN	8.46725	14.4609	8.15835	21.9219	13.7039	22.0051	28.6233	NaN	12.1677	7.5208	NaN	15.6109	NaN
A0A5S6GBZ7;P35750	A0A5S6GBZ7;P35750	CAPN1	Sus scrofa	Calpain 1;Calpain-1 catalytic subunit	4	4	;cytoplasm,cytosol,plasma membrane	;proteolysis,regulation of catalytic activity,self proteolysis	;calcium-dependent cysteine-type endopeptidase activity,calcium ion binding	FALSE	58	0.38218	4.58263	4.95825e-06	8.58667e-06	NaN	NaN	23.2171	74.5413	26.2511	32.9098	22.4299	25.4966	31.0363	21.0698	25.4663	39.6789	15.5436	NaN	30.5467	31.7714	24.2306	NaN	NaN	29.4132	NaN	12.1356	33.5146	NaN	NaN	NaN	NaN	29.4934	12.2438	18.1497	NaN	NaN	NaN	NaN
A0A5S6GXI4;Q8HZV3	A0A5S6GXI4;Q8HZV3	TFRC	Sus scrofa	Transferrin receptor protein 1	13	13	;plasma membrane,integral component of membrane,melanosome	;cellular iron ion homeostasis,positive regulation of B cell proliferation,receptor internalization,transferrin transport,positive regulation of T cell proliferation,positive regulation of isotype switching	;transferrin receptor activity,transferrin transmembrane transporter activity	FALSE	100	0.157544	5.33224	3.48148e-16	7.9633e-16	48.5922	37.564	30.3656	55.5553	46.7747	35.5372	43.1227	44.7506	29.4062	47.6101	42.5739	41.2063	40.8419	39.5693	36.4852	45.4427	40.866	44.5749	45.5951	47.2183	33.6757	30.4583	49.8358	42.3119	36.6898	35.2645	42.2517	44.9153	63.4863	42.908	40.6005	36.7813	34.8139	43.3715
A0A5S8KLN1;Q29549	A0A5S8KLN1;Q29549	CLU	Sus scrofa	Clusterin	23	58	;extracellular space,nucleus,endoplasmic reticulum,cytosol,mitochondrial membrane,spherical high-density lipoprotein particle,chromaffin granule,perinuclear region of cytoplasm,extracellular matrix	;positive regulation of proteasomal ubiquitin-dependent protein catabolic process,negative regulation of protein homooligomerization,positive regulation of apoptotic process,protein stabilization,positive regulation of NF-kappaB transcription factor activity,response to misfolded protein,chaperone-mediated protein folding,intrinsic apoptotic signaling pathway,negative regulation of intrinsic apop…	;protein binding,ubiquitin protein ligase binding,misfolded protein binding,ATPase activity	FALSE	100	0.119088	11.2606	1.77464e-17	5.98128e-17	2833.95	2867.76	2967.3	2991.09	2366.37	2949.09	2347.62	2813.47	2471.77	2734.58	2474.87	2146.25	2387.83	2658.53	2391.68	2273.01	2345.56	2628.38	2591.3	2389.65	2397.61	2274.48	2288.67	2984.75	3038.33	3049.37	2048.74	2614.73	1885.98	2281.41	2013.13	3387.84	2465.26	2071.01
A0A8I8C3K7;O02705	A0A8I8C3K7;O02705	HSP90AA1	Sus scrofa	Heat shock protein 90 alpha family class A member 1;Heat shock protein HSP 90-alpha	8	8	;nucleus,cytoplasm,plasma membrane,melanosome	;protein folding,response to heat,response to cold,positive regulation of nitric oxide biosynthetic process,response to antibiotic,regulation of catalytic activity	;ATP binding,ATPase activity,nitric-oxide synthase regulator activity,TPR domain binding,unfolded protein binding	FALSE	83.9	0.352773	4.66373	1.72352e-11	2.85087e-11	38.4053	21.1039	30.2609	71.7197	11.754	32.9515	21.6112	31.6209	32.9547	NaN	24.6926	NaN	22.2215	19.4542	NaN	34.9681	25.6317	NaN	21.3843	32.4068	29.1033	27.3338	26.9021	26.5181	15.1995	24.357	54.4921	19.1814	21.4697	20.0553	NaN	NaN	31.9149	33.9976
A0A8W4F6C3;P30034	A0A8W4F6C3;P30034	PF4	Sus scrofa	C-X-C motif chemokine;Platelet factor 4	4	10	;extracellular space	;inflammatory response,immune response,G-protein coupled receptor signaling pathway,regulation of receptor activity,negative regulation of angiogenesis,cytokine-mediated signaling pathway,platelet activation,leukocyte chemotaxis,positive regulation of cAMP metabolic process,response to lipopolysaccharide,regulation of cell proliferation,positive regulation of cAMP-mediated signaling,negative regu…	;chemokine activity,heparin binding,CXCR chemokine receptor binding,CXCR3 chemokine receptor binding	FALSE	100	0.292192	10.1357	7.04197e-13	1.08315e-12	1332.67	1253.54	1215.47	782.627	1046.75	1014.22	1100.36	1350.45	1774.71	984.309	1108.82	1970.31	1698.58	1848.73	1090.39	1139.63	1079.14	1456.03	1186.02	1023.02	1066.12	1099.9	577.544	1684.95	1525.3	1427.66	338.623	1355.3	1109.46	1107.88	1799.2	1418.79	1039.63	1298.52
A0A8W4F6L3	A0A8W4F6L3		Sus scrofa	Ig-like domain-containing protein	2	6				FALSE	96.4	0.294582	7.36529	6.89832e-17	1.91903e-16	92.9143	142.611	245.223	210.052	177.807	104.697	196.214	161.626	190.608	115.065	169.493	195.088	157.462	126.176	188.904	217.655	189.408	127.449	187.613	171.687	188.719	187.011	242.359	111.995	163.667	236.045	155.666	159.326	137.644	166.33	252.508	148.409	166.308	332.67
A0A8W4F807	A0A8W4F807		Sus scrofa	Ig-like domain-containing protein	6	17				FALSE	100	0.189602	13.8468	3.84824e-13	5.91712e-13	13497.7	14663.7	15146.5	14866.2	13265.6	13734.8	15339.2	14500.7	12558.1	13021.2	15231.3	15065.4	17418.6	13582.2	14641.2	14566.6	15354.8	12892.3	13525.9	14278.4	15494.4	14608	14035.6	13953	13570.2	16091.6	17019.5	16628.7	13776	13439.9	16380	12943.9	14410	31700.5
A0A8W4F8A6	A0A8W4F8A6	C9	Sus scrofa	Complement C9	27	44				FALSE	100	0.141327	8.97805	1.66998e-16	4.15565e-16	535.761	624.913	473.155	463.267	550.515	551.986	510.053	429.838	498.865	472.544	517.616	450.332	450.626	499.479	520.307	453.394	498.971	540.573	473.931	483.962	532.8	498.312	459.708	541.247	535.538	571.673	507.156	445.766	444.37	522.972	642.444	647.084	483.541	479.471
A0A8W4F8U6	A0A8W4F8U6		Sus scrofa	Ig-like domain-containing protein	9	26				FALSE	100	0.274316	10.4387	7.81816e-13	1.20321e-12	975.985	913.268	2336.04	1272.22	1414.56	1109.19	1564.15	1063.97	1419.37	1681.11	1364.7	1270.8	1830.31	1028.66	1445.62	2680.37	1328.02	1190.31	1510.52	1506.51	1399.16	1508.05	1153.93	1008.47	1370.29	1761.83	1379.09	1909.16	1496.29	1738.56	1642.7	1385.31	1437.6	3094.12
A0A8W4F8U8	A0A8W4F8U8	GPX1	Sus scrofa	Glutathione peroxidase	14	15				FALSE	50.9	1.38283	4.69573	1.25316e-09	2.39431e-09	NaN	NaN	NaN	353.888	22.8956	30.4641	26.8173	7.42128	33.2848	NaN	23.2083	NaN	NaN	NaN	19.8406	NaN	20.6718	NaN	NaN	21.257	25.6615	36.3197	75.9214	NaN	NaN	NaN	83.4865	NaN	22.582	NaN	13.729	NaN	22.8979	NaN
A0A8W4F968;Q8SPS7	A0A8W4F968;Q8SPS7	HP	Sus scrofa	Haptoglobin	30	72	;extracellular region	;immune system process,acute-phase response,defense response to bacterium,cellular oxidant detoxification	;antioxidant activity,hemoglobin binding	FALSE	100	0.387684	13.2639	1.77464e-17	5.98128e-17	13570.7	5610.87	18136.5	19176.7	7126.64	13200.5	10115.4	7952.92	12991.2	6408.31	11069.2	4984.17	11894.2	7102.08	10213.9	8561.77	11323.8	12243.4	6660.06	11455.3	10135.8	11244.7	3911.5	6047.22	12637	11793.7	7931.75	14784.3	6994.92	14578	3744.17	15942.4	11371	7444.56
A0A8W4F9E7	A0A8W4F9E7	GLO1	Sus scrofa	Lactoylglutathione lyase	4	4				FALSE	18.8	0.985896	5.03336	0.000151627	0.000237324	NaN	NaN	NaN	202.54	NaN	18.087	NaN	NaN	NaN	NaN	NaN	NaN	NaN	NaN	NaN	NaN	NaN	NaN	NaN	18.0596	NaN	NaN	60.8432	NaN	NaN	NaN	36.4336	NaN	NaN	NaN	18.2931	NaN	NaN	NaN
A0A8W4F9H3	A0A8W4F9H3	LOC100158011	Sus scrofa	BPTI/Kunitz inhibitor domain-containing protein	6	14				FALSE	100	0.247008	9.35245	1.77464e-17	5.98128e-17	702.125	833.535	782.151	617.48	636.03	541.726	693.829	842.581	790.467	666.532	652.25	1340.7	914.819	738.019	643.611	629.911	675.77	879.548	721.883	641.137	706.904	659.183	674.266	986	837.086	857.691	272.232	746.712	477.935	554.631	904.138	812.428	686.878	689.669
A0A8W4F9I3	A0A8W4F9I3		Sus scrofa	Ig-like domain-containing protein	1	1				FALSE	12.5	0.710195	5.63629	2.44403e-06	4.29411e-06	NaN	NaN	NaN	NaN	NaN	NaN	NaN	NaN	NaN	NaN	NaN	NaN	NaN	NaN	NaN	NaN	NaN	NaN	NaN	NaN	NaN	33.1354	NaN	NaN	NaN	NaN	NaN	NaN	14.6659	28.3303	18.1388	NaN	NaN	NaN
A0A8W4FA09	A0A8W4FA09	FLT4	Sus scrofa	receptor protein-tyrosine kinase	7	7				FALSE	100	0.18313	5.59642	4.9751e-12	7.90621e-12	36.6571	40.9012	40.8505	45.5851	60.3063	31.3868	55.7562	43.7301	55.1192	52.4134	51.0722	52.1211	44.5818	59.2866	50.4574	47.6502	59.8876	31.3956	56.0713	44.8927	51.8083	45.8231	65.1415	50.4639	38.3529	45.1573	56.7933	32.6064	54.1631	53.6878	57.3106	29.3278	62.0268	49.6911
A0A8W4FA34	A0A8W4FA34		Sus scrofa	Ig-like domain-containing protein	2	4				FALSE	100	0.404014	7.34357	1.4903e-16	3.75984e-16	128.284	80.8523	225.883	194.866	140.72	110.164	184.696	140.732	197.392	104.74	169.295	307.724	146.919	142.733	178.25	204.36	189.462	219.246	240.645	187.371	153.5	189.541	206.067	105.871	179.663	200.767	118.59	114.823	155.165	226.141	265.53	155.815	172.621	455.408
A0A8W4FAE2	A0A8W4FAE2		Sus scrofa	Leucine rich repeat containing 29	2	3				TRUE	100	0.172715	8.68609	5.14991e-09	9.98175e-09	456.696	536.349	334.3	404.393	412.532	410.789	434.654	345.036	445.669	392.645	430.982	458.486	298.353	363.853	476.412	341.708	412.854	330.702	546.081	329.977	451.13	290.589	399.545	452.82	329.548	473.483	521.857	455.669	456.334	338.051	350.017	421.364	447.721	430.616
A0A8W4FAN8	A0A8W4FAN8	FSIP2	Sus scrofa	Fibrous sheath interacting protein 2	1	1				TRUE	84.8	0.523544	3.08143	6.97041e-09	1.35106e-08	5.68602	11.5873	2.24518	NaN	21.3541	NaN	8.21762	2.74491	11.3053	16.7433	9.2875	5.3819	9.72429	16.239	NaN	8.08222	25.5841	2.254	2.23761	6.42002	NaN	8.40188	NaN	3.71036	13.8011	12.7069	11.2514	7.83271	4.1776	17.2392	2.00792	NaN	12.9661	8.038
A0A8W4FAT6	A0A8W4FAT6	PCBP1	Sus scrofa	Poly(rC) binding protein 1	2	2				FALSE	30.4	0.697251	4.31752	1.52012e-06	2.69601e-06	NaN	13.3194	NaN	98.0735	13.2499	NaN	NaN	NaN	NaN	22.4249	NaN	NaN	NaN	NaN	NaN	NaN	NaN	NaN	NaN	28.0827	NaN	NaN	38.5075	NaN	NaN	30.0697	NaN	NaN	24.3263	NaN	41.3375	NaN	NaN	NaN
A0A8W4FBM7	A0A8W4FBM7	HEG1	Sus scrofa	Heart development protein with EGF like domains 1	1	1				FALSE	38.4	0.768084	3.31545	6.44033e-06	1.10908e-05	NaN	NaN	NaN	NaN	6.79456	8.86392	12.3974	NaN	NaN	NaN	7.34808	NaN	NaN	NaN	NaN	NaN	4.27286	NaN	NaN	NaN	NaN	2.36494	2.88968	NaN	19.6622	14.414	NaN	NaN	11.8435	4.67602	17.2802	NaN	6.89566	NaN
A0A8W4FC14	A0A8W4FC14	LOC100125542	Sus scrofa	Ig-like domain-containing protein	8	20				FALSE	100	0.20348	12.7792	6.87408e-15	1.21146e-14	6067.27	6990.99	6754.99	6123.4	5708.08	6501.04	6988.93	7440.8	6036.54	7663.88	7460.15	5875.05	7863.34	6436.97	7228.58	6774.65	7038.82	5721.32	6160.79	7039.28	7076.06	7047.97	5812.5	7117.42	5565.58	6858.49	7828.27	8822.38	7426.16	6974.7	7256.6	5592.35	6799.49	15482.2
A0A8W4FC15	A0A8W4FC15		Sus scrofa	Ig-like domain-containing protein	21	55				FALSE	100	0.202397	14.273	1.77464e-17	5.98128e-17	16851.3	19465.3	31942.6	17790.7	16952.5	16868.6	19529	14659.7	18024.4	23375.4	19063.5	20275.7	25431.7	15368.7	19442.7	36459.6	20696.5	16384.5	21382.8	20555.1	19500	21202.3	17743.6	19918.5	20931.9	28671.5	20274.5	21915.3	20367.4	20438.6	18407.8	22797.6	19677.2	32887.3
A0A8W4FC67	A0A8W4FC67		Sus scrofa	Ig-like domain-containing protein	4	10				FALSE	100	0.214534	6.3492	2.63749e-13	4.06522e-13	80.2566	85.5016	101.741	81.9523	59.7961	77.4408	80.7251	73.6331	71.8173	63.0236	88.9536	110.88	98.0054	63.3801	82.1941	98.6182	89.7616	77.5369	68.6058	87.9087	81.6075	82.2583	86.1029	84.9323	82.0081	92.8291	71.5109	72.2447	83.9993	84.3583	77.7438	78.1157	83.4386	157.014
A0A8W4FDT9	A0A8W4FDT9	C3	Sus scrofa	Complement C3	14	37				FALSE	100	0.147977	12.0226	1.75334e-15	3.42485e-15	4795.51	3762.45	6600.82	4173.95	3592.84	4500.45	4305.6	5170.79	5197.14	3541.58	4252.93	5039.81	4029.78	4229.31	4045.59	5160.24	4015.39	3940.64	4285.31	4280.22	3968.28	4070.92	3740.16	4282.48	4443.97	4304.53	4504.04	3780.45	2971.79	3581.48	4065.41	4519.97	4162.18	2825.44
A0A8W4FE64	A0A8W4FE64	DNAH8	Sus scrofa	Dynein axonemal heavy chain 8	1	1				FALSE	82.1	0.302441	5.70343	2.2486e-08	4.32084e-08	71.5204	NaN	59.943	43.6279	45.3619	41.1357	76.0878	NaN	NaN	NaN	53.3452	66.4855	51.8482	56.8341	23.9914	75.7788	NaN	51.0244	54.9008	74.8134	59.3525	21.187	53.7077	73.1866	60.3981	52.5277	NaN	NaN	32.3976	52.5454	86.9057	NaN	37.6937	NaN
A0A8W4FEK6	A0A8W4FEK6		Sus scrofa	Ig-like domain-containing protein	2	7				FALSE	100	0.496444	9.83746	1.53779e-15	3.03814e-15	741.377	1295.68	1041.32	817.716	748.343	733.803	992.804	867.762	627.991	823.246	989.133	525.368	979.398	742.829	986.886	1146.81	1033.48	711.419	673.704	906.959	881.827	1046.73	734.525	1472.46	667.705	820.522	1151.98	840.364	1176.36	937.009	1142.16	663.899	939.479	3739.22
A0A8W4FEL9	A0A8W4FEL9		Sus scrofa	Ig-like domain-containing protein	3	6				FALSE	100	0.340384	7.4917	7.51874e-16	1.5876e-15	180.301	167.451	180.248	217.739	176.175	172.142	196.245	156.544	96.3991	143.876	194.029	110.653	206.645	128.221	162.742	193.946	201.153	150.167	192.8	156.694	174.221	192.466	188.724	153.146	127.759	146.148	212.339	169.589	220.494	272.626	193.2	147.248	183.079	557.379
A0A8W4FFD2	A0A8W4FFD2		Sus scrofa	Lipid-binding serum glycoprotein C-terminal domain-containing protein	1	1				TRUE	98.2	0.38812	4.89962	1.64956e-06	2.92086e-06	38.9072	46.3708	22.5848	58.2358	12.0635	27.5624	20.338	28.8554	48.53	32.7129	19.7507	21.6364	47.4669	37.6638	42.3757	14.38	27.5516	34.1782	43.345	23.7315	25.5686	20.134	29.1324	26.2895	9.58171	13.7551	62.7153	35.0781	38.3696	40.2642	26.3258	NaN	27.0746	28.5806
A0A8W4FFI3;P49924	A0A8W4FFI3;P49924	FABP1	Sus scrofa	Fatty acid-binding protein, liver;Fatty acid-binding protein, liver	3	3	;nucleoplasm,cytosol	;negative regulation of cysteine-type endopeptidase activity involved in apoptotic process,cellular response to hydrogen peroxide,cellular response to hypoxia,cellular oxidant detoxification	;chromatin binding,fatty acid binding,antioxidant activity	FALSE	91.1	0.390808	4.39566	2.91639e-08	5.58448e-08	12.1662	10.9469	20.0036	36.9739	26.1066	11.8814	23.9067	25.7587	7.71665	NaN	25.1531	NaN	10.2751	20.7655	16.0779	17.2051	14.8237	16.6795	19.5912	14.029	NaN	15.0495	18.8658	21.1262	24.9844	20.4354	17.1893	NaN	28.0721	16.5241	20.9581	16.6701	21.695	36.6132
A0A8W4FGI9	A0A8W4FGI9		Sus scrofa	Ig-like domain-containing protein	1	2				FALSE	95.5	0.451134	7.03459	3.19513e-15	5.94456e-15	91.4829	304.009	245.069	179.426	143.954	116.025	179.364	70.0912	156.476	72.8776	126.718	147.865	113.334	124.755	144.281	279.217	127.327	70.3938	170.013	177.034	132.773	151.972	347.039	356.248	128.266	195.744	105.625	105.673	103.136	184.316	140.227	122.539	146.063	338.692
A0A8W4FGK7	A0A8W4FGK7		Sus scrofa	Ig-like domain-containing protein	4	14				FALSE	100	0.260456	7.26376	1.77464e-17	5.98128e-17	132.857	144.491	162.087	178.884	143.065	125.16	165.947	111.567	141.104	96.5664	150.885	214.892	149.934	129.634	159.774	170.105	162.324	94.0743	151.706	162.285	157.587	159.383	231.493	134.558	119.745	204.659	216.472	152.16	142.196	203.078	179.7	150.955	167.845	263.347
A0A8W4FHQ3	A0A8W4FHQ3		Sus scrofa	Ig-like domain-containing protein	2	2				FALSE	100	0.367308	7.11248	1.22017e-12	1.88537e-12	154.644	152.448	187.999	146.6	79.3046	136.391	117.211	114.386	117.347	118.094	143.867	156.75	194.142	122.615	125.832	243.846	164.543	115.393	104.81	171.232	127.585	161.07	99.5623	127.958	114.333	125.001	180.912	122.5	165.033	131.855	113.398	100.746	145.197	334.758
A0A8W4FHQ7	A0A8W4FHQ7	SEMA7A	Sus scrofa	Semaphorin 7A (John Milton Hagen blood group)	1	1				FALSE	6.2	0.374334	3.49983	0.00013724	0.000215675	NaN	NaN	NaN	NaN	NaN	NaN	NaN	NaN	NaN	NaN	NaN	NaN	NaN	NaN	NaN	NaN	NaN	NaN	NaN	NaN	NaN	NaN	NaN	4.365	17.7781	NaN	NaN	NaN	NaN	NaN	NaN	NaN	NaN	NaN
A0A8W4FHV2	A0A8W4FHV2	PLA2G7	Sus scrofa	Platelet-activating factor acetylhydrolase	19	22				FALSE	100	0.102067	6.41291	1.77464e-17	5.98128e-17	90.2979	78.9839	84.886	95.9811	95.8262	93.5007	84.1424	77.4467	90.9452	73.1189	76.9267	94.942	86.0369	82.4667	88.0932	92.2115	76.6884	89.6893	111.497	81.5502	85.8329	87.3105	67.1719	76.6452	80.1203	75.0343	90.7582	77.9645	99.8652	74.5261	78.6932	85.6861	87.2361	100.271
A0A8W4FHY5	A0A8W4FHY5		Sus scrofa	Ig-like domain-containing protein	3	7				FALSE	99.1	0.660344	9.04324	3.84239e-14	6.19678e-14	1399.3	684.619	660.833	1464.06	794.643	1510.3	819.213	52.7609	488.076	79.5585	834.559	1198.39	31.9654	1702.43	850.089	691.786	814.01	1583.31	1318.58	839.892	778.251	883.013	809.728	865.653	754.415	950.734	79.8517	1858.1	1376.87	1068.07	929.254	891.008	897.555	1485.53
A0A8W4FI53	A0A8W4FI53		Sus scrofa	Ig-like domain-containing protein	1	1				FALSE	93.8	0.566731	5.84012	7.72458e-15	1.35123e-14	49.3233	69.7	76.4996	31.0174	42.2693	47.5853	58.3828	20.9416	53.722	33.9543	75.7579	55.3565	85.1566	26.8779	50.6948	79.1333	48.6246	32.4097	86.2821	53.8605	50.4473	70.8238	45.7598	31.7549	38.1943	62.9745	35.066	49.7584	47.0223	45.8529	76.2109	43.0147	54.8055	139.683
A0A8W4FIU4;A5A8X2	A0A8W4FIU4;A5A8X2	;LOC100512174	Sus scrofa	Butyrophilin subfamily 1 member A1-like;Novel protein similar to butyrophilin family proteins	1	1	;integral component of membrane	;	;	TRUE	42	0.967621	2.81764	1.81294e-09	3.48485e-09	NaN	NaN	NaN	55.1252	5.88818	4.59075	NaN	4.98846	NaN	NaN	14.1195	NaN	NaN	NaN	9.06383	NaN	14.3879	NaN	NaN	5.8336	10.0319	3.86476	16.4627	NaN	NaN	NaN	12.0708	NaN	3.74286	NaN	2.42445	NaN	7.55669	NaN
A0A8W4FJA1	A0A8W4FJA1		Sus scrofa	Ig-like domain-containing protein	12	34				FALSE	100	0.540051	12.3873	1.18561e-12	1.83135e-12	5109.99	9632.82	15252	1835.45	2296.63	5821.89	6385.23	4468.53	8320.61	12887.7	6322.85	6647.4	7981.06	4778.71	6179.33	18370.3	5390.9	4904.43	3864.22	5630.49	5751.76	5703.87	7060.03	8946.41	10938.7	14873	5904.9	7281.32	7112.68	10458.6	2649.1	11343.8	6074.6	8274.25
A0A8W4FJM1	A0A8W4FJM1	YKT6	Sus scrofa	YKT6 v-SNARE homolog	1	1				FALSE	99.1	0.844249	5.74634	2.15184e-14	3.55738e-14	44.8903	96.1194	22.4533	295.432	71.354	40.4645	69.9647	93.1449	50.3514	83.8441	67.5831	75.6074	32.0885	62.0151	64.5171	30.2672	91.8717	46.1541	66.0267	59.3922	92.7921	87.4623	368.695	30.8231	64.1026	78.5882	34.5939	33.1903	85.6766	15.8129	314.777	48.1067	52.3284	36.739
A0A8W4FK85	A0A8W4FK85	GCLC	Sus scrofa	Glutamate--cysteine ligase	6	6				FALSE	24.1	1.25901	2.31917	8.01825e-08	1.50911e-07	NaN	NaN	NaN	49.4529	2.7688	2.65181	9.96942	NaN	NaN	NaN	NaN	NaN	NaN	NaN	NaN	NaN	NaN	NaN	NaN	6.49728	5.04041	NaN	5.1949	NaN	NaN	3.67738	12.29	NaN	4.28648	NaN	NaN	NaN	3.91886	NaN
A0A8W4FKM9;P16611	A0A8W4FKM9;P16611	IGFBP3	Sus scrofa	Insulin-like growth factor-binding protein 3	10	10	;extracellular space,nucleus,insulin-like growth factor ternary complex	;regulation of cell growth,osteoblast differentiation,negative regulation of protein phosphorylation,protein phosphorylation,regulation of glucose metabolic process,negative regulation of smooth muscle cell migration,response to insulin,positive regulation of apoptotic process,positive regulation of MAPK cascade,regulation of insulin-like growth factor receptor signaling pathway,positive regulati…	;fibronectin binding,protein tyrosine phosphatase activator activity,insulin-like growth factor I binding,insulin-like growth factor II binding	FALSE	100	0.211888	6.32062	1.77464e-17	5.98128e-17	84.3725	78.9751	95.476	94.8173	43.4288	64.2698	88.9268	98.1694	80.6973	64.0023	80.1264	78.4756	92.8627	79.0297	80.536	107.564	89.5056	80.7446	113.632	72.1736	91.0946	78.8958	84.6194	77.2113	100.89	115.066	81.4521	66.3183	54.7463	76.3208	50.8138	84.5405	69.169	87.5098
A0A8W4FL59;Q69DK8	A0A8W4FL59;Q69DK8	C1S;	Sus scrofa	Complement C1s;Complement C1s subcomponent	27	45	;extracellular space	;complement activation, lectin pathway,proteolysis,complement activation, classical pathway	;serine-type endopeptidase activity,calcium ion binding	FALSE	100	0.100794	9.08328	2.77106e-17	8.74573e-17	521.199	466.74	555.4	577.535	519.063	476.506	505.862	507.986	559.169	640.78	522.858	482.182	514.658	566.36	511.295	609.112	521.868	592.803	567.549	543.35	548.492	538.186	467.706	519.817	611.681	492.694	510.718	517.29	645.319	492.697	474.075	505.658	532.12	634.839
A0A8W4FLG3	A0A8W4FLG3		Sus scrofa	Serpin domain-containing protein	17	44				FALSE	100	0.131268	13.0272	1.70281e-16	4.22746e-16	7421.02	7018.22	8166.65	6956.59	12658.8	6855.4	8205.02	8662.48	7648.37	7437.24	7853.4	8906.41	7192.93	8242.46	7765.92	9016.3	7964.78	9031.72	8073.31	7491.76	7872	7512.06	9674.88	6746.14	8539.88	8422.69	7797.29	7020.21	8485.45	7748.52	9340.05	8465.75	7833.55	10577.5
A0A8W4FMA6	A0A8W4FMA6		Sus scrofa	LRRCT domain-containing protein	2	2				FALSE	100	0.285431	5.11388	1.61293e-14	2.70474e-14	30.1572	30.0705	19.0203	63.0351	34.6295	28.7812	28.7262	30.8947	47.2741	33.8338	32.7981	49.6061	27.3041	28.4636	27.6515	25.1603	39.5654	62.1358	30.1348	26.0517	43.27	34.8161	66.5959	43.5685	21.5289	31.8418	30.3447	31.5804	40.3763	39.8987	37.5283	19.6779	27.387	50.8215
A0A8W4FMI6	A0A8W4FMI6		Sus scrofa	Ig-like domain-containing protein	4	12				FALSE	100	0.395829	9.4376	5.29954e-17	1.52729e-16	677.246	581.436	858.929	1025.08	777.105	688.846	739.455	503.02	500.481	489.804	802.565	467.238	736.01	467.956	767.168	875.402	781.312	537.889	653.564	709.066	720.733	697.339	882.753	638.146	577.846	702.932	833.521	544.151	500.044	698.412	1026.14	596.116	771.825	2223.35
A0A8W4FNE8	A0A8W4FNE8		Sus scrofa	Ig-like domain-containing protein	1	5				FALSE	89.3	0.610642	8.06643	9.16969e-13	1.41282e-12	305.226	NaN	304.901	706.889	NaN	346.738	218.895	474.752	91.3693	189.897	285.713	237.795	292.11	NaN	268.17	332.152	323.274	254.34	170.985	337.797	260.636	365.912	920.64	NaN	272.605	227.945	341.089	NaN	398.409	570.912	323.928	204.698	302.902	436.821
A0A8W4FNL6	A0A8W4FNL6	G6PD	Sus scrofa	Glucose-6-phosphate 1-dehydrogenase	3	3				FALSE	8.9	0.744227	3.31081	0.00062732	0.000918401	NaN	5.91631	NaN	35.492	3.06438	NaN	NaN	NaN	NaN	NaN	NaN	NaN	NaN	NaN	NaN	NaN	NaN	NaN	NaN	NaN	NaN	NaN	15.4497	NaN	NaN	NaN	NaN	NaN	NaN	NaN	3.86068	NaN	14.7205	NaN
A0A8W4FNY0	A0A8W4FNY0	FCN2	Sus scrofa	Ficolin 2	15	33				FALSE	100	0.262152	10.0365	9.22882e-17	2.47189e-16	1404.42	837.866	921.046	984.891	971.984	1395.53	1000.88	1100.53	943.609	966.791	1021.72	998.406	659.648	2091.62	1029.65	883.182	1020.64	1412.81	890.583	973.416	994.041	1058.41	1866.36	885.81	917.231	859.176	1141.4	1071.84	1148.37	760.315	1313.9	841.665	1013.38	1563.4
A0A8W4FQ38	A0A8W4FQ38		Sus scrofa	Ig-like domain-containing protein	6	15				FALSE	100	0.276278	10.2703	3.41884e-14	5.53896e-14	1141.11	989.071	907.382	1248.22	970.602	1262.77	1279.82	1224.65	715.733	1162.52	1209.76	1163.75	1652.89	1471.99	1217.21	1110.55	1262.94	1173.9	977.883	1185.3	1194.33	1185.53	1009.06	982.309	924.453	922.656	1579.38	1629.44	1484.84	1060.45	1551.76	725.537	1264.33	3221.27
A0A8W4FRI5	A0A8W4FRI5		Sus scrofa	Ig-like domain-containing protein	21	63				FALSE	100	0.299095	14.2896	6.4249e-16	1.378e-15	17445.2	14647.7	12240.9	20516	18779.7	19134.7	21312.9	20602.3	19407.6	16028	21405.3	17607	22719.1	17896.6	20990.6	12566.9	19908.3	16955.9	16320.4	20580.8	20148.3	20240.5	16800.8	14744	10406.1	11909.5	24451.5	22142.5	17791.7	18171.8	26256.8	10221.5	20798.8	49324.4
A0A900NI31;O18994	A0A900NI31;O18994	GPX5	Sus scrofa	Glutathione peroxidase;Epididymal secretory glutathione peroxidase	2	4	;extracellular region	;response to oxidative stress,oxidation-reduction process,cellular oxidant detoxification	;glutathione peroxidase activity	FALSE	100	0.149668	7.94653	1.00508e-11	1.63164e-11	258.287	317.92	231.105	247.965	283.069	260.465	253.3	221.849	368.08	229.958	231.452	350.298	265.499	250.63	235.352	245.019	245.128	292.922	251.046	230.841	242.63	237.853	314.06	276.885	261.056	271.972	263.759	202.517	302.182	225.201	252.135	243.942	255.583	191.908
A0SNU8	A0SNU8	HMBS	Sus scrofa	hydroxymethylbilane synthase	3	3		peptidyl-pyrromethane cofactor linkage,tetrapyrrole biosynthetic process	hydroxymethylbilane synthase activity	FALSE	8.9	0.960775	2.70667	3.03513e-07	5.56037e-07	NaN	NaN	NaN	30.3386	NaN	NaN	NaN	NaN	NaN	NaN	NaN	NaN	NaN	NaN	NaN	NaN	NaN	NaN	NaN	NaN	NaN	NaN	6.34684	NaN	NaN	NaN	6.30896	NaN	NaN	NaN	NaN	NaN	NaN	NaN
A1E295	A1E295	CTSB	Sus scrofa	Cathepsin B	2	2	extracellular space,lysosome,melanosome	regulation of catalytic activity,proteolysis involved in cellular protein catabolic process	cysteine-type endopeptidase activity	FALSE	90.2	0.369155	4.70487	7.9201e-08	1.49099e-07	17.3951	24.9466	21.4177	14.9735	37.7459	24.086	10.7338	21.1492	72.5357	26.5601	15.8491	NaN	NaN	26.992	26.8828	36.1121	30.5745	29.0555	28.2052	25.4935	30.2401	25.628	27.9792	33.6187	43.0262	13.3159	19.1521	19.242	29.9096	14.7738	NaN	28.9125	19.4495	NaN
A1XQU1	A1XQU1	PSMB7	Sus scrofa	Proteasome subunit beta type-7	2	2	nucleoplasm,cytosol,proteasome core complex,proteasome core complex, beta-subunit complex	proteolysis involved in cellular protein catabolic process,positive regulation of protein targeting to mitochondrion	threonine-type endopeptidase activity	FALSE	71.4	0.420854	3.43986	2.55353e-07	4.6948e-07	21.7124	10.1825	11.3722	34.633	NaN	9.39827	12.1387	6.93823	11.6417	NaN	11.4911	NaN	9.53352	7.45001	13.5516	NaN	12.3327	NaN	7.20214	13.5496	5.22484	11.9847	14.8551	13.9591	12.5217	10.7424	11.8105	NaN	NaN	13.6947	NaN	NaN	15.7804	13.2143
A2SW51	A2SW51	CD14	Sus scrofa	Monocyte differentiation antigen CD14	14	28	Golgi apparatus,anchored component of external side of plasma membrane,membrane raft,lipopolysaccharide receptor complex	receptor-mediated endocytosis,inflammatory response,lipopolysaccharide-mediated signaling pathway,positive regulation of type I interferon production,positive regulation of interferon-gamma production,positive regulation of tumor necrosis factor production,toll-like receptor 4 signaling pathway,innate immune response,positive regulation of endocytosis,cellular response to lipoteichoic acid,cellul…	lipopolysaccharide binding,lipoteichoic acid binding,lipopeptide binding	FALSE	100	0.0999811	8.34085	4.06458e-15	7.42734e-15	362.394	313.873	284.567	355.379	431.613	350.846	312.778	293.324	353.784	416.239	332.662	295.073	277.414	365.971	322.213	302.979	329.93	351.441	303.771	336.778	315.591	313.788	318.753	297.847	320.624	273.842	313.097	315.893	386.63	340.162	308.751	286.914	320.523	327.901
A2TLM1;F1STC1	A2TLM1;F1STC1	RPIA	Sus scrofa	Ribose-5-phosphate isomerase;ribose-5-phosphate isomerase	3	3	intracellular membrane-bounded organelle,cytosol;	D-ribose metabolic process,pentose-phosphate shunt, non-oxidative branch;pentose-phosphate shunt, non-oxidative branch	ribose-5-phosphate isomerase activity;ribose-5-phosphate isomerase activity,identical protein binding	FALSE	57.1	0.811676	3.86307	1.033e-07	1.93464e-07	11.9921	22.722	NaN	99.6676	6.39775	18.3123	15.9177	16.7662	NaN	13.9109	NaN	13.5881	NaN	2.78771	NaN	NaN	12.1491	11.3378	NaN	19.8786	13.9584	18.4851	41.6492	NaN	9.97582	7.23248	46.075	NaN	12.4723	12.1438	NaN	NaN	14.5449	NaN
A6M928;F6Q8Z7	A6M928;F6Q8Z7	EIF4A1;EIF4A2	Sus scrofa	ATP-dependent RNA helicase	1	1	nucleolus,cytoplasm;	translational initiation,regulation of gene expression,RNA secondary structure unwinding;	translation initiation factor activity,ATP-dependent RNA helicase activity,ATP binding;	FALSE	6.2	0.789515	3.14576	0.000271141	0.000413863	NaN	NaN	NaN	17.0941	NaN	NaN	NaN	NaN	NaN	NaN	NaN	NaN	NaN	NaN	NaN	NaN	NaN	NaN	NaN	NaN	NaN	NaN	27.8927	NaN	NaN	NaN	NaN	NaN	NaN	NaN	6.62463	NaN	NaN	NaN
A6ZIC9	A6ZIC9	IGFBP6	Sus scrofa	Insulin-like growth factor-binding protein 6	2	2	insulin-like growth factor binary complex	regulation of cell growth	insulin-like growth factor II binding	FALSE	98.2	0.36212	4.33174	1.42003e-16	3.60369e-16	14.16	21.3097	NaN	16.1223	36.6528	17.0853	30.3959	19.1647	13.9529	15.7537	16.6021	28.4842	29.833	24.3845	22.7289	21.4961	27.0015	25.7587	21.9594	22.765	31.1061	33.9311	20.5027	15.57	19.7626	19.0443	24.1601	17.6921	21.2084	16.7469	13.4269	11.8525	12.9452	18.3453
A7YX24	A7YX24	SNCG	Sus scrofa	Gamma-synuclein	13	19	cytoplasm,axon,neuronal cell body	chemical synaptic transmission,adult locomotory behavior,protein secretion,regulation of dopamine secretion,regulation of neurotransmitter secretion,synapse organization		FALSE	78.6	1.87104	5.2113	2.0062e-13	3.1016e-13	NaN	32.3156	12.315	963.178	42.1485	44.629	48.0358	41.9394	19.1558	28.0878	43.593	NaN	NaN	NaN	46.6115	35.0172	53.1216	NaN	17.1467	46.5108	47.5954	39.0628	231.552	9.29232	7.62545	22.7246	158.972	23.813	32.9197	18.7366	44.7531	NaN	48.2637	22.9632
A8D737	A8D737	CDH13	Sus scrofa	Cadherin-13	1	1				FALSE	74.1	0.381241	4.27749	1.23938e-07	2.31271e-07	17.7678	12.6379	15.6039	NaN	40.7493	21.9761	NaN	18.778	26.4397	22.4771	7.58353	11.0204	27.3697	5.17415	NaN	6.74946	15.5716	28.2411	14.8573	20.7115	NaN	NaN	NaN	33.2608	24.4006	14.315	17.0919	13.4856	29.0439	29.2133	30.8375	11.9248	31.8908	NaN
A8U4R4	A8U4R4	TKT	Sus scrofa	Transketolase	14	19	nuclear speck,myelin sheath	regulation of growth,glyceraldehyde-3-phosphate biosynthetic process	transketolase activity,protein homodimerization activity,cofactor binding	FALSE	94.6	1.37679	3.45079	3.38848e-13	5.21321e-13	5.90313	11.2698	6.52363	189.942	14.4909	18.5873	13.3214	13.8957	7.80066	5.86169	11.7921	4.65578	8.44881	7.52602	14.9449	8.84004	15.7087	6.67735	7.99711	11.1467	10.1438	13.4827	35.1758	7.6589	5.0997	7.75318	32.8569	8.69637	12.4981	9.73834	14.5461	NaN	12.4919	12.0107
B5KJG2	B5KJG2	PGAM2	Sus scrofa	Phosphoglycerate mutase	8	10	cytosol	gluconeogenesis,glycolytic process,regulation of pentose-phosphate shunt	bisphosphoglycerate mutase activity,2,3-bisphosphoglycerate-dependent phosphoglycerate mutase activity	FALSE	100	0.41978	4.738	2.09637e-15	4.03368e-15	21.0809	35.7794	14.6251	29.4433	49.6125	61.2256	18.3783	42.4747	13.4116	41.5186	28.9505	21.9554	19.2831	27.1083	27.0684	25.2588	29.643	37.4908	19.1498	23.145	27.3704	24.4271	27.2031	26.1841	27.2651	42.9392	19.3468	26.1283	25.421	13.4936	13.3704	34.2722	33.5853	28.2499
B8Y648	B8Y648	UBE2L3	Sus scrofa	Ubiquitin-conjugating enzyme E2L 3	3	4		protein ubiquitination	ATP binding,ubiquitin conjugating enzyme activity	FALSE	17	0.712236	3.89268	9.48653e-06	1.61944e-05	NaN	NaN	NaN	60.7763	NaN	NaN	NaN	NaN	NaN	NaN	18.6058	NaN	NaN	NaN	NaN	NaN	NaN	NaN	NaN	NaN	NaN	NaN	19.4603	NaN	NaN	NaN	17.3633	NaN	17.0153	NaN	16.176	NaN	NaN	NaN
B9UJD6	B9UJD6	C1QTNF3	Sus scrofa	C1q and TNF related 3	2	2	extracellular region,collagen trimer			FALSE	99.1	0.35572	5.73019	1.77464e-17	5.98128e-17	77.2113	57.8884	80.3935	107.963	34.0618	44.6336	62.4212	76.3125	57.6586	NaN	56.1057	50.2512	67.1475	64.7603	56.4914	84.8864	52.1672	60.6834	71.9236	65.552	68.5706	52.4308	58.8732	66.1561	62.6763	100.198	22.6008	101.53	23.1562	51.9908	10.8002	67.9754	51.4509	80.7819
C3S7K5	C3S7K5	S100A8	Sus scrofa	Protein S100	2	2	extracellular space,cytosol,intermediate filament cytoskeleton	leukocyte migration involved in inflammatory response,positive regulation of peptide secretion,autophagy,activation of cysteine-type endopeptidase activity involved in apoptotic process,astrocyte development,peptidyl-cysteine S-nitrosylation,neutrophil chemotaxis,innate immune response,positive regulation of inflammatory response,neutrophil aggregation,positive regulation of intrinsic apoptotic s…	calcium ion binding,microtubule binding,zinc ion binding,Toll-like receptor 4 binding,arachidonic acid binding,RAGE receptor binding	FALSE	27.7	0.546705	3.65371	0.000466041	0.000693027	NaN	NaN	NaN	22.7452	NaN	3.09706	7.45223	NaN	9.06896	NaN	NaN	NaN	NaN	NaN	NaN	NaN	12.9099	20.8441	NaN	NaN	NaN	6.10395	11.1527	NaN	11.4141	NaN	29.5135	NaN	NaN	NaN	NaN	NaN	NaN	NaN
CYB5_HUMAN;P00172	P00172	CYB5A	Sus scrofa	Cytochrome b5	3	3	;mitochondrion,endoplasmic reticulum membrane,cytosol,integral component of membrane,organelle membrane	;oxidation-reduction process	;enzyme binding,heme binding,metal ion binding	FALSE	30.4	1.07462	3.44587	3.44173e-09	6.65977e-09	NaN	NaN	NaN	94.0428	16.118	8.32749	3.80348	9.93819	NaN	NaN	NaN	NaN	NaN	NaN	NaN	12.7451	NaN	NaN	NaN	10.5516	NaN	6.31251	14.7013	NaN	NaN	NaN	19.7345	NaN	6.23578	6.8466	4.2767	NaN	16.2615	NaN
D0G0C8	D0G0C8	CCT2	Sus scrofa	T-complex protein 1 subunit beta	1	2	zona pellucida receptor complex,chaperonin-containing T-complex,microtubule,myelin sheath,cell body	'de novo' protein folding,binding of sperm to zona pellucida,positive regulation of telomere maintenance via telomerase,protein stabilization,chaperone mediated protein folding independent of cofactor,chaperone-mediated protein complex assembly,positive regulation of telomerase activity,chaperone-mediated protein folding,scaRNA localization to Cajal body,toxin transport,positive regulation of est…	ATP binding,ubiquitin protein ligase binding,protein binding involved in protein folding,unfolded protein binding	FALSE	8.9	0.597266	3.96534	0.000335598	0.00050718	NaN	NaN	NaN	NaN	NaN	NaN	NaN	NaN	14.8105	NaN	NaN	NaN	NaN	NaN	NaN	NaN	NaN	NaN	NaN	11.0475	NaN	6.49401	NaN	NaN	NaN	NaN	24.6087	NaN	NaN	NaN	NaN	NaN	19.6069	NaN
D2WL18	D2WL18	FBXO7	Sus scrofa	F-box protein 7	1	1	ubiquitin ligase complex,nucleus,mitochondrion,cytosol,glial cytoplasmic inclusion,classical Lewy body,Lewy neurite,Lewy body core,Lewy body corona	mitophagy,ubiquitin-dependent protein catabolic process,protein targeting to mitochondrion,regulation of neuron projection development,protein ubiquitination,regulation of protein stability,regulation of locomotion,negative regulation of lymphocyte differentiation,negative regulation of cyclin-dependent protein serine/threonine kinase activity,negative regulation of oxidative stress-induced neuro…	protein kinase binding,ubiquitin protein ligase binding,ubiquitin binding,protein heterodimerization activity	FALSE	4.5	0.42278	3.08949	3.06376e-05	5.07162e-05	NaN	NaN	NaN	9.42608	NaN	NaN	NaN	NaN	NaN	NaN	4.78665	NaN	NaN	NaN	NaN	NaN	NaN	NaN	NaN	NaN	NaN	NaN	NaN	NaN	NaN	NaN	NaN	NaN	NaN	NaN	NaN	NaN	NaN	NaN
E0A8P1;Q75ZP3	E0A8P1;Q75ZP3	IGFBP1	Sus scrofa	Insulin-like growth factor-binding protein 1	1	1	extracellular space,Golgi apparatus;extracellular space	regulation of cell growth;regulation of cell growth,regulation of insulin-like growth factor receptor signaling pathway	insulin-like growth factor I binding,insulin-like growth factor II binding;insulin-like growth factor I binding,insulin-like growth factor II binding	FALSE	37.5	0.732386	1.45682	1.34388e-11	2.2033e-11	NaN	NaN	NaN	NaN	12.5137	NaN	4.47543	NaN	NaN	NaN	5.28353	NaN	NaN	NaN	NaN	NaN	1.40131	NaN	NaN	1.41885	7.40367	1.50356	1.53786	NaN	NaN	3.81426	NaN	NaN	7.1062	NaN	NaN	NaN	NaN	NaN
E7D6R2	E7D6R2	BHMT	Sus scrofa	Betaine homocysteine methyltransferase	8	8	cytosol,extracellular exosome	amino-acid betaine metabolic process,methylation,L-methionine salvage	zinc ion binding,betaine-homocysteine S-methyltransferase activity	FALSE	58.9	0.665427	3.48742	1.51366e-12	2.34552e-12	9.92752	NaN	9.03729	NaN	5.25486	NaN	13.3129	8.02837	NaN	NaN	14.2596	NaN	NaN	16.5732	NaN	6.87777	NaN	11.6585	NaN	NaN	NaN	13.1116	7.6533	NaN	7.55865	6.12473	NaN	15.5901	16.3222	6.30739	51.6243	5.22269	7.12834	NaN
E7EI20	E7EI20	ARHGDIA	Sus scrofa	Rho GDP dissociation inhibitor alpha	2	3	immunological synapse,nucleus,cytoplasm	Rho protein signal transduction,regulation of protein localization,regulation of catalytic activity,semaphorin-plexin signaling pathway	Rho GDP-dissociation inhibitor activity	FALSE	27.7	0.853507	4.74866	7.26862e-06	1.24838e-05	NaN	NaN	10.8413	158.825	NaN	28.0642	NaN	NaN	NaN	19.0122	17.6687	NaN	NaN	NaN	NaN	NaN	28.2121	NaN	NaN	5.83581	NaN	36.2755	51.6167	NaN	NaN	NaN	48.4068	NaN	NaN	NaN	46.66	NaN	19.3338	NaN
F1RFQ7	F1RFQ7	RAN	Sus scrofa	GTP-binding nuclear protein Ran	10	13	chromatin,nucleus,nuclear envelope,nucleoplasm,nucleolus,cytoplasm,centriole,midbody,RNA nuclear export complex,recycling endosome	ribosomal subunit export from nucleus,ribosomal large subunit export from nucleus,ribosomal small subunit export from nucleus,protein import into nucleus, translocation,mitotic sister chromatid segregation,protein import into nucleus,actin cytoskeleton organization,positive regulation of protein binding,cellular protein complex localization,GTP metabolic process,snRNA import into nucleus,protein …	magnesium ion binding,GTPase activity,GTP binding,GDP binding,cadherin binding,protein heterodimerization activity,pre-miRNA binding	FALSE	75	1.5748	5.08604	4.56703e-13	7.0194e-13	NaN	37.6102	NaN	657.395	32.111	38.0863	54.3427	27.4621	NaN	17.4454	40.1291	NaN	NaN	9.67791	32.0277	34.8507	45.5997	NaN	16.8053	35.3206	30.5682	50.6149	134.982	16.7827	NaN	14.3899	112.495	17.3004	34.1846	19.471	72.468	NaN	41.7133	NaN
F1RFU7	F1RFU7	CDH11	Sus scrofa	Cadherin 11	4	4	cytoplasm,plasma membrane,integral component of membrane	homophilic cell adhesion via plasma membrane adhesion molecules,corticospinal tract morphogenesis	calcium ion binding	FALSE	100	0.19984	5.31447	1.9541e-16	4.77272e-16	54.6529	41.3993	35.5371	42.3599	42.42	50.388	55.3493	43.371	44.095	49.1662	46.5462	35.607	51.3008	58.9505	40.7247	42.6016	37.5544	40.5179	46.1811	26.0929	35.2191	34.6661	44.493	47.7339	48.6695	42.8973	35.5339	37.1637	40.1302	40.7622	33.3516	46.0476	45.1212	49.2996
F1RFY1	F1RFY1	PFN1	Sus scrofa	Profilin	6	12	nucleus,cytoplasm,cell cortex	positive regulation of epithelial cell migration,actin cytoskeleton organization,regulation of actin filament polymerization,negative regulation of actin filament polymerization,positive regulation of actin filament polymerization,positive regulation of actin filament bundle assembly,positive regulation of ATPase activity,protein stabilization,negative regulation of stress fiber assembly,positive…	adenyl-nucleotide exchange factor activity,actin binding,actin monomer binding,phosphatidylinositol-4,5-bisphosphate binding,cadherin binding,proline-rich region binding	FALSE	100	0.782867	6.1099	1.43575e-14	2.42241e-14	56.2449	139.839	38.2081	373.837	95.8445	53.099	81.5506	85.7639	63.5545	95.3308	87.1181	62.9185	37.8529	75.3542	74.1744	41.7207	78.7778	54.7852	46.0128	82.5985	72.5412	79.9289	408.794	39.9353	63.0619	72.9974	64.1231	39.4686	87.2905	39.7273	290.684	51.4423	85.1701	51.8769
F1RFZ7	F1RFZ7	BAIAP3	Sus scrofa	BAI1 associated protein 3	1	1	endoplasmic reticulum	G-protein coupled receptor signaling pathway		FALSE	86.6	0.516971	4.10299	4.93773e-06	8.5519e-06	NaN	7.93578	13.6707	NaN	16.0158	8.34893	10.8918	39.172	18.8287	13.0859	23.6339	27.5309	12.0706	21.8493	26.4549	19.6544	33.271	14.7361	8.27504	42.8791	20.8278	9.58997	36.0147	19.0088	11.9416	30.7762	12.2794	NaN	19.0403	NaN	28.0671	54.6145	17.9265	23.3468
F1RG16	F1RG16	HNRNPF	Sus scrofa	Heterogeneous nuclear ribonucleoprotein F	1	1			RNA binding	FALSE	7.1	0.400968	4.93199	0.000345685	0.000521687	NaN	NaN	NaN	NaN	NaN	NaN	NaN	NaN	NaN	NaN	NaN	NaN	NaN	NaN	NaN	NaN	NaN	NaN	NaN	40.9267	NaN	29.7813	NaN	NaN	NaN	NaN	42.6945	NaN	NaN	NaN	NaN	NaN	39.028	NaN
F1RGX4	F1RGX4	LOC110259958	Sus scrofa	Globin family profile domain-containing protein	23	52	hemoglobin complex	oxygen transport	oxygen transporter activity,iron ion binding,oxygen binding,heme binding	FALSE	100	1.47582	12.1613	1.038e-16	2.73889e-16	808.747	7212.56	1058.62	110526	7320.6	11657.4	11075.6	8457.95	1373.84	6642.17	10948.4	769.161	492.966	1499.38	11117	7058.6	10865.3	2058.76	2716.79	11277.4	11153.4	10705.3	31979.4	1497.17	1066.16	4948.63	29586.6	3002.92	8419.07	3763.04	11673.9	480.996	10979.7	3344.79
F1RGX7;P02009	F1RGX7;P02009	HBZ	Sus scrofa	Hemoglobin subunit zeta	3	3	hemoglobin complex;hemoglobin complex	negative regulation of transcription from RNA polymerase II promoter,oxygen transport,erythrocyte maturation;oxygen transport	oxygen transporter activity,iron ion binding,oxygen binding,heme binding;oxygen transporter activity,iron ion binding,oxygen binding,heme binding	FALSE	18.8	0.907696	4.33556	1.20115e-05	2.03897e-05	NaN	NaN	NaN	110.942	NaN	18.4002	NaN	NaN	NaN	NaN	NaN	NaN	NaN	NaN	NaN	NaN	NaN	NaN	NaN	NaN	NaN	27.6066	28.5103	NaN	NaN	NaN	39.5241	NaN	NaN	NaN	12.1422	NaN	NaN	NaN
F1RGY5	F1RGY5	NID1	Sus scrofa	Nidogen 1	6	6	basal lamina,extracellular space,cell periphery,extracellular matrix	cell-matrix adhesion,positive regulation of cell-substrate adhesion,glomerular basement membrane development	calcium ion binding,collagen binding,laminin-1 binding,proteoglycan binding	FALSE	99.1	0.23568	4.42011	5.47614e-09	1.0615e-08	21.577	32.0558	28.2434	26.2217	17.9287	16.5689	27.9084	17.807	20.824	19.0578	19.5465	18.3221	17.7038	14.9066	23.7955	25.5273	14.823	16.5733	28.2621	21.1857	26.4848	23.6683	26.9783	23.6577	27.6463	24.6778	19.8445	22.4853	23.3193	42.7531	29.0839	30.9879	18.4737	24.8417
F1RHA7	F1RHA7	TGFBI	Sus scrofa	Transforming growth factor beta induced	22	29	proteinaceous extracellular matrix,extracellular space,trans-Golgi network	angiogenesis,cell adhesion,cell proliferation,extracellular matrix organization	integrin binding,collagen binding,extracellular matrix binding	FALSE	100	0.135148	7.31514	9.86707e-16	2.02967e-15	166.473	202.265	165.495	175.234	134.921	132.904	178.908	165.073	155.434	151.367	163.706	118.989	165.675	152.256	164.232	171.223	145.478	164.614	204.571	158.61	152.542	152.125	160.066	217.908	152.955	160.046	154.368	206.881	149.147	183.878	104.288	147.263	161.225	195.784
F1RI72	F1RI72	GOLGA3	Sus scrofa	Golgin A3	1	1	nucleoplasm,nucleolus,cytosol,Golgi transport complex,extrinsic component of Golgi membrane	spermatogenesis	cadherin binding	FALSE	72.3	0.334094	4.8362	8.32493e-05	0.00013335	39.423	38.9287	34.9558	NaN	31.6437	35.4849	29.9272	19.5977	11.8621	26.521	NaN	37.3976	NaN	25.5081	NaN	NaN	31.6699	NaN	24.1371	NaN	23.7597	NaN	21.3027	NaN	13.6223	37.533	NaN	55.5926	27.6168	20.1871	42.7474	NaN	25.907	53.1739
F1RIJ6	F1RIJ6	ZBTB48	Sus scrofa	Zinc finger and BTB domain containing 48	2	2			nucleic acid binding	FALSE	98.2	0.186659	8.55364	0.000876063	0.0012586	374.242	422.62	430.578	393.603	291.505	304.161	423.125	421.791	NaN	450.738	471.408	358.937	481.194	602.813	381.899	417.907	324.435	400.597	349.904	395.883	375.798	423.515	244.924	491.325	372.685	407.887	419.564	341.171	287.603	301.349	332.319	514.787	363.933	452.768
F1RIS0	F1RIS0	PRSS36	Sus scrofa	Polyserase-2	1	1	cytoplasm,extrinsic component of plasma membrane,anchored component of plasma membrane	proteolysis,positive regulation of sodium ion transport,regulation of molecular function	serine-type endopeptidase activity,serine-type peptidase activity,sodium channel regulator activity	FALSE	26.8	0.344266	4.31351	1.02473e-05	1.74615e-05	NaN	NaN	NaN	NaN	NaN	18.6371	NaN	NaN	NaN	24.725	NaN	NaN	NaN	NaN	NaN	NaN	22.9445	NaN	23.9475	NaN	NaN	NaN	NaN	10.5672	29.0808	NaN	NaN	25.5004	13.5396	NaN	NaN	NaN	NaN	31.6852
F1RJJ3	F1RJJ3	SBDS	Sus scrofa	Ribosome maturation protein SBDS	1	1	spindle pole,nucleus,nucleolus,cytoplasm,cytosol	inner cell mass cell proliferation,rRNA processing,mitotic spindle organization,bone mineralization,leukocyte chemotaxis,mature ribosome assembly,bone marrow development	RNA binding,microtubule binding,rRNA binding,ribosome binding	FALSE	67	0.446052	4.19468	1.31953e-09	2.52349e-09	25.8899	23.5267	NaN	20.9013	19.3726	10.0328	10.7434	NaN	20.534	34.6633	36.1415	NaN	NaN	NaN	15.9314	NaN	20.2574	NaN	26.5612	NaN	44.2504	23.5574	11.4684	26.937	32.5027	25.6427	4.77933	40.7141	21.1498	14.9206	NaN	NaN	14.8799	NaN
F1RJP8	F1RJP8	MSRA	Sus scrofa	peptide-methionine (S)-S-oxide reductase	1	1	nucleoplasm,mitochondrion,cytosol,actin cytoskeleton	oxidation-reduction process	peptide-methionine (S)-S-oxide reductase activity	FALSE	8.9	0.670359	4.13729	0.000843003	0.00121383	NaN	NaN	NaN	12.3581	NaN	NaN	NaN	NaN	17.5922	NaN	NaN	NaN	NaN	NaN	NaN	NaN	NaN	NaN	17.0685	NaN	NaN	NaN	NaN	NaN	NaN	NaN	55.486	NaN	NaN	NaN	NaN	NaN	12.7699	NaN
F1RJU3	F1RJU3	DOCK5	Sus scrofa	Dedicator of cytokinesis 5	1	1	cytosol,plasma membrane	small GTPase mediated signal transduction,positive regulation of epithelial cell migration,regulation of molecular function,positive regulation of substrate adhesion-dependent cell spreading,negative regulation of vascular smooth muscle contraction,positive regulation of vascular associated smooth muscle cell migration	guanyl-nucleotide exchange factor activity	FALSE	53.6	0.380536	5.30761	9.88749e-08	1.85336e-07	NaN	NaN	40.1565	56.887	NaN	NaN	NaN	42.9632	40.5629	NaN	NaN	NaN	NaN	NaN	NaN	NaN	58.63	NaN	48.9253	NaN	60.5659	NaN	NaN	15.9866	28.4523	NaN	NaN	NaN	NaN	NaN	18.7296	37.4278	52.5232	NaN
F1RK01	F1RK01	CPB2	Sus scrofa	Carboxypeptidase B2	20	41	extracellular space	proteolysis,fibrinolysis	metallocarboxypeptidase activity,zinc ion binding	FALSE	100	0.0916716	10.4289	1.77464e-17	5.98128e-17	1378.54	1439.75	1352.31	1470.46	1678.69	1383.61	1414.28	1308.95	1206.68	1304.23	1329.4	1376.39	1506.45	1385.46	1415.19	1430.55	1366.97	1657.9	1166.06	1321.68	1326.52	1362.46	1346.13	1501.48	1490.06	1384.31	1271.84	1397.65	1675.97	1459.37	1305.15	1430.61	1428.1	1396.11
F1RK91	F1RK91	SEC14L5	Sus scrofa	SEC14 like lipid binding 5	1	1				FALSE	46.4	0.36995	5.3855	0.000837745	0.0012067	NaN	31.2398	NaN	NaN	54.4928	NaN	39.5134	NaN	48.598	NaN	31.1569	NaN	32.0083	NaN	46.6649	NaN	NaN	18.4941	NaN	NaN	NaN	NaN	NaN	NaN	NaN	58.3973	78.5583	NaN	15.8347	50.5759	NaN	28.7667	23.2844	NaN
F1RKG8	F1RKG8	PEBP1	Sus scrofa	Phosphatidylethanolamine-binding protein 1	13	16				FALSE	93.8	1.42448	4.34031	1.77464e-17	5.98128e-17	12.9377	24.1434	9.70956	385.253	30.0813	33.9203	28.2546	24.8885	NaN	19.7948	32.7563	7.56453	2.33114	12.1297	30.5257	26.3321	30.2549	9.91698	7.60533	34.2296	33.9987	24.2306	99.0492	NaN	15.3007	17.2699	77.6489	11.4654	32.3029	12.8753	53.2333	12.3587	24.4609	8.91702
F1RKI3	F1RKI3	HINT1	Sus scrofa	Histidine triad nucleotide binding protein 1	5	5			catalytic activity,protein binding	FALSE	25	1.01561	5.87692	6.85979e-10	1.29346e-09	NaN	NaN	NaN	435.283	65.7793	NaN	NaN	NaN	NaN	61.6394	NaN	NaN	NaN	NaN	NaN	NaN	23.8234	NaN	NaN	NaN	NaN	54.1795	99.1281	NaN	NaN	NaN	128.505	NaN	NaN	NaN	51.387	NaN	16.7251	NaN
F1RKZ6	F1RKZ6	USP7	Sus scrofa	Ubiquitin carboxyl-terminal hydrolase 7	3	3	nucleus,cytosol,macromolecular complex	transcription-coupled nucleotide-excision repair,ubiquitin-dependent protein catabolic process,maintenance of DNA methylation,negative regulation of NF-kappaB transcription factor activity,negative regulation of proteasomal ubiquitin-dependent protein catabolic process,monoubiquitinated protein deubiquitination,protein stabilization,protein K48-linked deubiquitination,positive regulation of DNA d…	p53 binding,cysteine-type endopeptidase activity,thiol-dependent ubiquitin-specific protease activity,protein C-terminus binding,transcription factor binding,ubiquitin protein ligase binding,Lys48-specific deubiquitinase activity	FALSE	98.2	0.192863	7.05405	1.54697e-07	2.87371e-07	129.126	181.991	128.811	134.528	149.615	93.0854	150.473	132.147	92.7233	184.449	144.343	142.646	153.639	172.256	123.029	137.757	141.834	158.212	119.776	123.088	161.873	124.466	188.155	130.025	119.04	106.414	155.748	162.417	194.526	119.736	199.717	NaN	120.662	146.44
F1RL06	F1RL06	LOC100523213	Sus scrofa	Ig-like domain-containing protein	3	5	external side of plasma membrane,immunoglobulin complex, circulating,blood microparticle	phagocytosis, recognition,phagocytosis, engulfment,complement activation, classical pathway,defense response to bacterium,innate immune response,B cell receptor signaling pathway,positive regulation of B cell activation	antigen binding,immunoglobulin receptor binding	FALSE	100	0.197723	8.614	5.30842e-11	9.16574e-11	332.901	326.783	361.296	354.685	402.408	353.165	421.994	290.206	393.205	329.621	432.727	500.924	642.971	344.257	374.967	376.837	437.21	333.566	307.274	406.022	386.317	318.769	429.122	354.336	288.212	394.817	412.366	446.188	404.639	294.246	385.467	313.671	362.939	574.937
F1RLC4	F1RLC4	LOX	Sus scrofa	Lysyl oxidase homolog	1	1		oxidation-reduction process	copper ion binding,oxidoreductase activity, acting on the CH-NH2 group of donors, oxygen as acceptor	TRUE	94.6	0.358209	4.81803	5.4368e-11	9.39619e-11	31.3202	34.5306	11.153	15.119	42.3763	20.2712	21.7371	27.9705	29.1246	15.603	29.9749	25.9834	37.2103	35.4058	14.97	29.4871	22.4228	28.0779	24.5618	21.8292	21.8983	26.9671	27.8376	37.1701	18.7019	22.9468	17.6572	50.9275	17.4685	25.8159	NaN	26.8891	27.7978	44.4625
F1RM45	F1RM45	APOE	Sus scrofa	Apolipoprotein E	22	41	endoplasmic reticulum,Golgi apparatus,plasma membrane,extracellular matrix,very-low-density lipoprotein particle,low-density lipoprotein particle,intermediate-density lipoprotein particle,high-density lipoprotein particle,chylomicron,Requires Ontology	negative regulation of endothelial cell proliferation,response to dietary excess,triglyceride metabolic process,cholesterol catabolic process,cellular calcium ion homeostasis,receptor-mediated endocytosis,response to oxidative stress,G-protein coupled receptor signaling pathway,nitric oxide mediated signal transduction,long-term memory,regulation of gene expression,negative regulation of platelet…	beta-amyloid binding,phospholipid binding,heparin binding,antioxidant activity,cholesterol transporter activity,protein homodimerization activity,metal chelating activity,tau protein binding,low-density lipoprotein particle receptor binding,phosphatidylcholine-sterol O-acyltransferase activator activity,very-low-density lipoprotein particle receptor binding,lipoprotein particle binding	FALSE	100	0.105818	10.446	1.13149e-16	2.95333e-16	1249.91	1139.8	1473.93	1136.68	1575.28	1586.83	1416.95	1415.05	1258.01	1069.22	1344.44	1421.6	1378.2	1366.03	1420.15	1555.99	1397.75	1637.25	1409.36	1381.85	1391.54	1307.77	1326.26	1308.52	1216.35	1162.44	1243.32	1551.62	1476.87	1279.96	1231.28	1109.35	1428.27	1655.5
F1RMN6	F1RMN6	SMPD1	Sus scrofa	Sphingomyelin phosphodiesterase	9	10	extracellular space,lysosome,endosome,plasma membrane	sphingomyelin catabolic process,termination of signal transduction,positive regulation of protein dephosphorylation,negative regulation of MAP kinase activity,ceramide biosynthetic process	zinc ion binding,hydrolase activity, acting on glycosyl bonds,acid sphingomyelin phosphodiesterase activity	FALSE	100	0.211569	4.72597	1.09655e-14	1.87802e-14	33.2311	37.1426	25.4775	21.5242	23.4606	18.5804	22.8236	32.7248	34.3596	31.6234	20.4046	28.7744	18.9042	30.5365	22.0221	32.3668	27.4632	20.1683	19.7082	25.1108	26.8347	27.9847	31.4136	30.93	32.372	25.031	27.567	25.7246	32.2359	24.5338	16.7857	27.834	21.4881	33.9413
F1RN40	F1RN40	F7	Sus scrofa	Coagulation factor VII	3	3	extracellular region,serine-type peptidase complex	positive regulation of leukocyte chemotaxis,blood coagulation,positive regulation of platelet-derived growth factor receptor signaling pathway,protein processing,positive regulation of positive chemotaxis,positive regulation of protein kinase B signaling	serine-type endopeptidase activity,calcium ion binding	FALSE	100	0.190344	5.33189	4.54838e-15	8.24431e-15	42.6423	41.9236	30.9313	43.4154	63.2561	42.3973	34.9642	27.0653	44.2623	26.8113	31.429	44.2464	47.2564	36.4366	37.6584	39.179	54.155	53.7936	48.2156	33.1815	37.4881	34.5293	41.9512	30.7276	31.9525	43.6966	38.0694	44.3493	45.9598	41.3657	36.6844	32.7467	39.8659	48.2625
F1RN41	F1RN41	F10	Sus scrofa	Coagulation factor X	17	23	extracellular region,integral component of membrane	proteolysis,blood coagulation,positive regulation of protein kinase B signaling	serine-type endopeptidase activity,calcium ion binding,phospholipid binding	FALSE	100	0.0954715	8.29691	1.77464e-17	5.98128e-17	286.931	332.085	271.203	348.233	306.795	297.557	322.766	276.759	277.579	279.198	301.672	253.679	303.124	295.295	310.711	340.5	318.807	320.062	315.677	299.078	313	317.481	239.752	316.091	345.745	339.695	293.261	346.438	289.165	307.805	299.721	336.685	305.218	347.133
F1RN71	F1RN71	BLMH	Sus scrofa	Bleomycin hydrolase	3	4		proteolysis	cysteine-type endopeptidase activity	FALSE	79.5	0.564207	4.60297	8.98859e-08	1.68801e-07	NaN	NaN	25.7192	127.574	21.4028	15.0471	28.7391	38.0296	28.5147	20.8246	30.6694	13.691	32.5458	14.1501	NaN	31.959	22.6917	NaN	19.817	NaN	NaN	18.7015	45.4844	18.5382	NaN	NaN	30.3986	28.8766	26.106	25.7118	19.7929	NaN	10.437	NaN
F1RN76	F1RN76	CD5L	Sus scrofa	CD5 molecule like	17	33				FALSE	100	0.190362	7.73694	7.70997e-15	1.34884e-14	161.943	220.757	174.65	153.8	191.454	176.21	217.657	196.5	160.436	344.853	213.764	246.061	239.661	192.911	211.594	169.869	214.702	150.382	237.184	221.949	221.735	213.31	229.443	207.088	195.436	214.931	276.421	199.527	257.868	280.141	287.977	183.832	201.301	284.105
F1RPA7	F1RPA7	GP2	Sus scrofa	Glycoprotein 2	8	9	extracellular region,integral component of membrane			FALSE	100	0.294661	5.29733	2.56585e-14	4.20772e-14	27.366	74.2888	44.0934	28.8625	30.6031	28.8069	44.8205	37.0026	56.4425	35.2667	56.2168	47.1624	29.2439	25.3274	47.0875	54.6659	39.7056	43.2753	24.996	40.8654	42.481	39.644	53.4287	72.3742	47.8141	36.4979	44.0164	47.6351	37.985	47.0177	28.1046	55.3922	42.0325	36.0028
F1RPH0;Q7SIB7	F1RPH0;Q7SIB7	PGK1	Sus scrofa	Phosphoglycerate kinase;Phosphoglycerate kinase 1	13	15	extracellular space,membrane raft;cytoplasm	glycolytic process,negative regulation of angiogenesis,epithelial cell differentiation,plasminogen activation,oxidation-reduction process,cellular response to hypoxia;glycolytic process,phosphorylation	phosphoglycerate kinase activity,ATP binding,protein-disulfide reductase activity;phosphoglycerate kinase activity,ATP binding	FALSE	92.9	0.713622	5.10168	9.42142e-12	1.52623e-11	19.2114	54.4307	NaN	233.454	70.9514	79.0083	37.7469	44.1005	14.6329	56.5519	33.7405	12.7945	NaN	19.1427	44.7965	30.0069	38.6617	NaN	26.7193	38.1982	36.9387	33.3627	85.2449	19.2849	16.9644	37.4411	49.4041	18.4788	37.4791	20.3194	70.8641	19.5712	34.3051	14.4862
F1RPI9	F1RPI9	ATRX	Sus scrofa	DNA helicase	1	1	condensed nuclear chromosome, centromeric region,nuclear chromosome, telomeric region,PML body,nuclear pericentric heterochromatin,telomeric heterochromatin,SWI/SNF superfamily-type complex,nuclear subtelomeric heterochromatin	meiotic spindle organization,DNA replication-independent nucleosome assembly,chromatin remodeling,spermatogenesis,positive regulation of nuclear cell cycle DNA replication,DNA damage response, signal transduction by p53 class mediator,forebrain development,replication fork processing,positive regulation of telomere maintenance,post-embryonic forelimb morphogenesis,multicellular organism growth,Se…	chromatin binding,ATP binding,DNA translocase activity,methylated histone binding,metal ion binding,chromo shadow domain binding	FALSE	61.6	0.533672	3.28237	3.49397e-05	5.76102e-05	NaN	NaN	NaN	19.906	16.5388	7.97522	22.2267	10.1689	NaN	18.9091	17.6059	17.309	20.9075	NaN	14.561	NaN	NaN	18.0623	9.05276	NaN	NaN	12.8102	8.71805	NaN	4.93666	14.2195	9.51118	NaN	6.44755	13.0989	25.2592	NaN	NaN	NaN
F1RPW2	F1RPW2	F5	Sus scrofa	Coagulation factor V	81	115	extracellular space,platelet alpha granule	blood coagulation,blood circulation	copper ion binding	FALSE	100	0.09596	8.61057	1.77464e-17	5.98128e-17	398.147	346.348	341.002	341.493	495.477	376.581	388.599	329.557	404.951	372.662	376.271	421.182	412.104	400.699	404.126	343.868	384.426	438.048	424.742	384.843	408.314	407.012	371.128	357.561	380.642	339.229	365.353	367.429	424.775	400.972	438.588	402.461	386.126	367.433
F1RQ01	F1RQ01	FERMT3	Sus scrofa	FERM domain containing kindlin 3	10	12		integrin-mediated signaling pathway		FALSE	94.6	0.381931	5.08142	3.71535e-09	7.19256e-09	26.9596	40.5833	44.5577	62.1608	36.3287	27.1033	36.9188	26.1118	27.0529	48.2735	35.0827	37.3152	7.40835	37.6602	32.3206	55.8281	21.971	25.6628	39.9141	24.9745	37.7539	26.6996	90.3944	54.5107	17.2566	20.5031	31.4546	26.5783	32.3961	22.1584	73.755	20.4064	32.692	38.501
F1RQ75	F1RQ75	F9	Sus scrofa	Coagulation factor IX	17	28	extracellular space	blood coagulation,zymogen activation	serine-type endopeptidase activity,calcium ion binding	FALSE	100	0.0758535	8.13501	1.77464e-17	5.98128e-17	262.792	266.537	262.6	245.364	304.432	290.325	289.44	258.745	299.51	272.706	272.526	297.443	273.85	277.972	286.661	282.729	264.08	262.643	225.25	261.004	279.295	279.864	253.023	257.73	281.117	282.076	296.815	271.852	316.152	285.705	301.499	282.993	284.903	239.475
F1RQD7	F1RQD7	GARIN3	Sus scrofa	Golgi associated RAB2B interactor family member 3	1	1	nucleus			TRUE	48.2	0.707782	2.17603	0.000129136	0.000203431	9.82377	7.20504	NaN	15.4839	NaN	4.61213	2.49847	NaN	9.88737	1.81997	2.89848	NaN	NaN	3.84598	4.4424	3.70771	3.99772	NaN	NaN	2.0326	11.2812	NaN	2.2126	NaN	3.28708	2.58547	NaN	2.24447	NaN	NaN	NaN	NaN	9.17974	11.3562
F1RQI0	F1RQI0	COL12A1	Sus scrofa	Collagen type XII alpha 1 chain	1	1	extracellular space,extracellular matrix	endodermal cell differentiation		FALSE	74.1	0.503476	3.99938	9.05462e-13	1.39495e-12	19.397	28.6934	33.9701	9.2994	NaN	23.1536	10.3648	NaN	NaN	12.2522	13.7165	NaN	21.8428	NaN	NaN	NaN	4.79624	12.347	16.7399	13.7538	31.3564	8.53173	22.2577	30.5816	22.7938	32.2793	17.6282	15.1644	10.428	14.2538	NaN	27.5038	38.2831	11.0943
F1RQW7	F1RQW7	C2	Sus scrofa	Complement C2	27	43	extracellular space	proteolysis,complement activation, classical pathway,positive regulation of apoptotic cell clearance	serine-type endopeptidase activity	FALSE	100	0.118537	8.30713	1.77464e-17	5.98128e-17	283.69	260.171	295.388	420.819	365.846	272.573	301.875	242.247	292.389	268.055	313.811	256.77	374.82	340.003	317.118	289.875	299.806	300.473	251.21	323.706	334.174	314.622	300.719	263.551	348.079	284.515	296.168	293.972	358.692	247.126	265.028	336.322	294.172	309.181
F1RQZ9	F1RQZ9	EFTUD2	Sus scrofa	116 kDa U5 small nuclear ribonucleoprotein component	1	1	cytosol,Cajal body,nuclear speck,U4/U6 x U5 tri-snRNP complex,U2-type catalytic step 2 spliceosome		GTPase activity,GTP binding	FALSE	79.5	0.27687	5.78804	0.00118743	0.00167449	66.0735	NaN	65.4087	58.2986	61.4856	68.7626	46.3261	47.8363	69.1041	65.666	51.5368	NaN	NaN	46.9388	NaN	37.5836	48.3551	79.5371	69.4655	47.6896	50.4527	50.7378	42.3918	54.7994	45.6634	64.7387	79.1725	53.4011	39.0318	31.3832	31.0381	88.6933	44.7391	46.2675
F1RR40;P10289	F1RR40;P10289	FABP6	Sus scrofa	Fatty acid binding protein 6;Gastrotropin	1	1	cytoplasm;cytoplasm,membrane	;lipid transport	lipid binding,bile acid binding;lipid binding,bile acid binding	FALSE	88.4	0.411101	4.55446	1.87688e-10	3.40004e-10	NaN	22.9916	NaN	29.5918	13.3288	27.5397	NaN	28.8569	27.2691	38.0891	16.3696	49.3366	18.0384	15.5758	38.6769	17.0321	19.6852	13.5501	30.3024	19.1754	18.5899	8.91175	19.0279	37.2075	45.2075	33.0327	27.9225	21.603	20.4088	NaN	22.056	18.3024	32.7328	NaN
F1RR80	F1RR80	GLE1	Sus scrofa	mRNA export factor GLE1	1	1	nucleolus,cytoplasm,cytosol,nuclear membrane,nuclear pore cytoplasmic filaments	mRNA export from nucleus,regulation of translational initiation,regulation of translational termination,poly(A)+ mRNA export from nucleus	inositol hexakisphosphate binding,phospholipid binding,translation initiation factor binding,identical protein binding	FALSE	80.4	0.438424	4.02087	1.36278e-05	2.30614e-05	6.95984	11.9463	11.8641	16.2782	10.5707	NaN	14.9432	9.40495	15.1872	23.8765	20.7615	15.6103	22.9815	14.3894	23.9548	NaN	12.7794	NaN	25.3875	15.5471	12.5067	15.0409	33.6481	NaN	18.1053	33.5378	NaN	11.0075	11.8658	17.6744	16.3092	12.9217	15.0985	NaN
F1RRU7	F1RRU7	MRC2	Sus scrofa	Mannose receptor C type 2	1	1				TRUE	65.2	0.506209	3.45555	1.81262e-06	3.20363e-06	NaN	25.7059	16.1415	12.777	10.8527	13.347	13.8204	10.1176	8.16532	11.295	14.3681	NaN	NaN	NaN	7.86221	7.78377	NaN	20.191	8.00244	NaN	21.4474	7.45549	5.22819	14.2217	20.8415	10.8691	NaN	11.9317	18.4476	23.1141	NaN	NaN	7.49758	30.9715
F1RRV3	F1RRV3	TG	Sus scrofa	Thyroglobulin	9	9	extracellular space	iodide transport,thyroid gland development,regulation of myelination,thyroid hormone metabolic process		FALSE	93.8	0.355521	4.13459	8.09312e-10	1.53215e-09	26.6481	16.0087	NaN	32.4099	16.3134	16.9717	14.4755	13.3458	22.7951	10.7433	20.3657	16.5399	10.5847	19.8527	14.5653	18.5758	25.4628	20.2829	9.08745	18.4181	15.5085	14.1099	18.5542	10.8966	18.9336	20.5166	19.5097	NaN	11.21	10.9026	12.1232	21.0915	20.3251	12.9564
F1RRW5	F1RRW5	ACE	Sus scrofa	Angiotensin-converting enzyme	18	20	cytoplasm,plasma membrane,integral component of membrane	kidney development,neutrophil mediated immunity,positive regulation of systemic arterial blood pressure,proteolysis,spermatogenesis,posttranscriptional regulation of gene expression,negative regulation of gene expression,negative regulation of protein binding,positive regulation of protein binding,hormone catabolic process,heart contraction,positive regulation of protein tyrosine kinase activity,…	carboxypeptidase activity,metallopeptidase activity,peptidyl-dipeptidase activity,metal ion binding	FALSE	100	0.163299	5.40355	9.18263e-16	1.90179e-15	53.4135	47.6021	48.9517	42.0517	36.932	45.7933	38.8341	51.8224	47.3954	48.4698	45.0286	58.6966	53.259	38.2321	45.7368	59.4901	42.0091	44.1401	49.2875	33.9348	40.8126	36.8295	62.5303	40.685	45.3067	43.7248	53.4034	38.1433	36.633	30.1342	28.1694	39.9659	38.7837	50.1146
F1RS37	F1RS37	POSTN	Sus scrofa	Periostin	39	64	proteinaceous extracellular matrix,extracellular space,trans-Golgi network	cell adhesion,regulation of Notch signaling pathway,tissue development,extracellular matrix organization,cellular response to vitamin K	heparin binding,metal ion binding	FALSE	100	0.441874	7.3537	1.77464e-17	5.98128e-17	140.529	217.032	197.678	140.635	68.1196	119.031	174.151	358.716	223.211	313.875	178.075	124.573	122.836	146.777	175.283	213.111	169.887	195.819	354.32	166.153	183.598	163.627	102.472	346.608	237.075	196.976	201.949	110.182	99.7485	115.72	63.6083	180.937	176.249	126.447
F1RT17	F1RT17	AGA	Sus scrofa	Aspartylglucosaminidase	4	6	extracellular space,lysosome,endoplasmic reticulum	protein deglycosylation,protein maturation	N4-(beta-N-acetylglucosaminyl)-L-asparaginase activity	FALSE	100	0.144237	5.64041	5.91929e-12	9.45274e-12	39.7273	61.2249	57.2084	57.1152	52.4967	41.6278	65.3204	49.2415	52.4758	49.3461	43.6661	52.7756	43.8773	61.2748	57.2556	65.2062	51.5996	50.6818	48.3938	42.1143	63.916	52.3681	55.0941	61.8463	52.8524	41.1775	50.9668	56.4629	55.2894	41.943	62.7598	38.7112	44.2267	43.975
F1RUE4	F1RUE4	GPLD1	Sus scrofa	Phosphatidylinositol-glycan-specific phospholipase D	35	50				FALSE	100	0.108933	8.28221	1.77464e-17	5.98128e-17	335.745	211.835	274.42	291.079	359.938	327.774	309.177	289.072	296.136	293.558	322.576	329.431	330.675	338.482	308.633	296.04	293.376	301.648	290.135	318.265	303.449	304.871	384.989	219.753	341.251	350.864	298.698	243.006	315.287	287.864	252.813	340.894	308.113	286.227
F1RUM1	F1RUM1	AFM	Sus scrofa	Afamin	38	80				FALSE	100	0.101109	10.0267	1.77464e-17	5.98128e-17	847.53	1172.42	920.8	921.381	889.445	864.32	1051.4	1230.28	960.77	1232.27	993.552	1001.52	942.038	1019.49	1026.83	1178.84	1032.41	1098.77	1043.57	1013.3	1086.49	1015.75	1091.91	1030.46	1016.4	1142.01	1159.11	1010.27	1091.24	811.778	885.152	991.341	1081.54	1000.84
F1RUM4	F1RUM4	ITIH2	Sus scrofa	Inter-alpha-trypsin inhibitor heavy chain 2	41	107		negative regulation of endopeptidase activity,hyaluronan metabolic process	serine-type endopeptidase inhibitor activity	FALSE	100	0.0693139	12.1479	1.77464e-17	5.98128e-17	4941.77	5102.93	4010.03	4470.38	3751.15	4629.1	4468.27	4125.87	4793.73	4424.24	4420.59	4349.67	4148.49	4770.82	4422.55	4550.75	4540.72	5142.96	4756.31	4424.99	4371.88	4372.73	5028.38	4851.85	4528.12	4842.82	4344.47	4257.1	4455.71	4749.94	4850.43	4633.57	4534.93	4433.03
F1RVL7	F1RVL7	TREML1	Sus scrofa	Triggering receptor expressed on myeloid cells like 1	2	3	integral component of membrane			FALSE	99.1	0.208154	6.12584	9.63287e-16	1.98599e-15	82.095	71.6051	78.0042	54.3292	63.0631	63.1639	69.4599	75.8507	102.123	65.861	62.8283	104.254	81.3002	73.8409	65.2285	58.8157	74.3669	104.219	71.3016	71.095	90.1851	67.315	86.4434	77.1119	76.0057	80.8218	NaN	72.4086	62.9427	59.9096	105.087	73.8755	65.0153	86.3361
F1RW98	F1RW98	RSU1	Sus scrofa	Ras suppressor protein 1	7	8				FALSE	76.8	0.74015	4.40362	3.03567e-08	5.8095e-08	15.2205	22.0012	16.2368	89.3048	25.0881	15.4236	19.8399	20.3032	NaN	19.8386	23.7259	NaN	NaN	17.6077	23.6982	12.9187	26.8206	13.5345	15.119	27.4525	25.964	17.4719	114.963	NaN	13.9538	44.3978	NaN	NaN	36.6775	15.8952	81.9873	12.7735	15.6364	NaN
F1RWJ5	F1RWJ5	KPNB1	Sus scrofa	Importin subunit beta-1	10	12	nucleoplasm,cytoplasm,cytosol,nuclear membrane,nuclear periphery,endoplasmic reticulum tubular network	protein import into nucleus, translocation,NLS-bearing protein import into nucleus,ribosomal protein import into nucleus,mitotic chromosome movement towards spindle pole,mitotic metaphase plate congression,astral microtubule organization,Ran protein signal transduction,establishment of mitotic spindle localization,mitotic spindle assembly	nuclear localization sequence binding,Ran GTPase binding,protein transporter activity,protein domain specific binding,Hsp90 protein binding	FALSE	25	0.840535	3.65682	2.62372e-09	5.06573e-09	NaN	NaN	NaN	72.1421	NaN	10.778	NaN	24.8165	NaN	NaN	NaN	NaN	NaN	NaN	NaN	NaN	NaN	NaN	NaN	23.9832	11.4414	9.29314	18.4366	NaN	NaN	NaN	8.41634	NaN	NaN	NaN	21.8145	NaN	NaN	NaN
F1RWK7	F1RWK7	PLXDC1	Sus scrofa	Plexin domain containing 1	1	1	cytoplasm,plasma membrane,integral component of membrane,receptor complex	angiogenesis		FALSE	35.7	0.445616	3.65329	3.28537e-06	5.73816e-06	18.4138	19.121	NaN	NaN	12.7317	NaN	NaN	21.1971	NaN	NaN	NaN	22.5009	NaN	18.73	16.9755	NaN	NaN	NaN	10.6327	NaN	NaN	NaN	NaN	NaN	NaN	4.73362	NaN	NaN	NaN	10.6227	NaN	NaN	15.6486	NaN
F1RWY0;Q06AA3	F1RWY0;Q06AA3	RGN	Sus scrofa	Regucalcin	2	2	extracellular region,nucleus,cytoplasm;extracellular region,cytoplasm	L-ascorbic acid biosynthetic process,regulation of catalytic activity;L-ascorbic acid biosynthetic process,regulation of catalytic activity	gluconolactonase activity,calcium ion binding,zinc ion binding,enzyme regulator activity;gluconolactonase activity,calcium ion binding,zinc ion binding,enzyme regulator activity	FALSE	3.6	0.835172	1.89865	4.4686e-08	8.49978e-08	NaN	NaN	NaN	NaN	NaN	NaN	NaN	NaN	NaN	NaN	NaN	NaN	NaN	NaN	NaN	NaN	NaN	NaN	NaN	NaN	NaN	NaN	NaN	NaN	NaN	NaN	NaN	NaN	NaN	NaN	NaN	NaN	NaN	NaN
F1RX36	F1RX36	FGA	Sus scrofa	Fibrinogen alpha chain	40	72	fibrinogen complex	signal transduction,platelet activation,protein polymerization	receptor binding,protein binding, bridging	FALSE	100	2.97833	8.51906	1.09674e-16	2.87387e-16	212.729	265.686	349.677	471.228	294.916	338.563	609.626	270.215	275.992	319.639	577.812	230.614	291.445	262.321	623.441	318.167	594.244	220.183	238.666	629.428	650.343	560.084	373.961	250.416	223.128	277.465	495.744	256.366	257.959	222.172	300.045	284.599	629.816	244.142
F1RX66	F1RX66	GSR	Sus scrofa	Glutathione reductase	2	2	mitochondrion,external side of plasma membrane	glutathione metabolic process,electron transport chain,cell redox homeostasis,cellular oxidant detoxification	glutathione-disulfide reductase activity,electron carrier activity,flavin adenine dinucleotide binding,NADP binding	FALSE	68.8	0.441319	4.64329	0.000164504	0.000256617	23.5572	41.6708	NaN	64.2599	21.6464	22.8166	21.9588	NaN	29.2116	NaN	20.5398	NaN	20.3941	28.4397	5.67201	28.2243	22.8459	10.172	23.1466	NaN	NaN	24.4061	44.941	71.4185	NaN	NaN	25.6852	22.7837	27.3666	NaN	9.42597	21.6191	25.5717	19.0079
F1RXC2	F1RXC2	CA2	Sus scrofa	Carbonic anhydrase	19	36	cytosol,plasma membrane,myelin sheath,apical part of cell	morphogenesis of an epithelium,one-carbon metabolic process,carbon dioxide transport,positive regulation of synaptic transmission, GABAergic,positive regulation of cellular pH reduction,angiotensin-activated signaling pathway,secretion,positive regulation of dipeptide transmembrane transport,regulation of chloride transport	arylesterase activity,carbonate dehydratase activity,zinc ion binding	FALSE	100	1.82637	5.54205	2.06739e-15	3.98251e-15	15.1225	61.0131	17.0839	1336.63	62.4357	91.114	84.3558	67.279	23.6328	44.1359	76.192	17.7155	12.1951	20.4814	90.1117	60.3577	75.4769	15.4614	32.4756	71.1217	85.6815	77.7267	273.222	23.9687	16.8631	38.805	318.917	26.6614	63.9098	30.6838	104.849	6.71374	77.1108	30.7587
F1RXM6	F1RXM6	SERPINA7	Sus scrofa	Serpin family A member 7	16	33	extracellular space	thyroid hormone transport		FALSE	100	0.103197	8.94383	1.77464e-17	5.98128e-17	610.892	595.224	489.045	499.985	454.81	587.226	482.619	585.447	571.631	556.842	469.38	545.364	416.216	534.842	510.559	446.658	476.033	573.651	501.18	492.23	480.732	461.863	481.454	639.182	605.028	516.177	505.441	526.251	490.331	420.721	397.049	489.998	516.289	512.369
F1RXU8	F1RXU8	ANKAR	Sus scrofa	Ankyrin and armadillo repeat containing	1	1	nucleus,cytoplasm			FALSE	38.4	0.680825	3.81425	9.62024e-07	1.72169e-06	40.9774	5.01134	28.4902	NaN	NaN	NaN	NaN	5.70809	17.9938	NaN	4.95691	NaN	NaN	NaN	27.7888	NaN	14.5472	NaN	NaN	NaN	27.4584	7.54891	12.7979	NaN	5.3644	NaN	17.8434	9.45645	NaN	NaN	NaN	NaN	NaN	NaN
F1RZ89	F1RZ89	SGSH	Sus scrofa	N-sulfoglucosamine sulfohydrolase	3	4	lysosome	glycosaminoglycan catabolic process,heparan sulfate proteoglycan catabolic process	sulfuric ester hydrolase activity,N-sulfoglucosamine sulfohydrolase activity	FALSE	88.4	0.319763	4.41753	3.26624e-11	5.53395e-11	22.5318	42.7013	16.4042	28.6232	17.1299	27.9966	24.3613	10.4347	NaN	27.5043	20.007	29.058	33.4107	36.5928	20.998	NaN	23.0602	28.8947	7.27376	14.7243	20.9023	21.1673	18.1384	46.9904	30.3314	22.6487	NaN	NaN	26.672	24.7334	27.734	28.2385	16.0856	28.9499
F1RZN7	F1RZN7	KLKB1	Sus scrofa	Kallikrein B1	36	67	extracellular space	blood coagulation, intrinsic pathway,plasminogen activation,positive regulation of fibrinolysis	serine-type endopeptidase activity	FALSE	100	0.133437	10.7086	1.77464e-17	5.98128e-17	1960.78	1340.18	1300.16	1553.27	2067.08	1933.49	1669.04	1373.6	1536.27	1437.84	1561.4	1756.6	1839.55	2088.47	1593.61	1558.2	1693.22	1714.22	1649.7	1725.12	1665.8	1730.94	1772.62	1315.81	1337.52	1334.15	1651.99	1323.84	1729.44	1396.74	1445.56	1428.73	1653.27	1330.64
F1S021	F1S021	COL5A1	Sus scrofa	Collagen type V alpha 1 chain	3	3	collagen type V trimer,basement membrane,extracellular space	blood vessel development,heart morphogenesis,cell adhesion,collagen fibril organization,collagen biosynthetic process,wound healing, spreading of epidermal cells,tendon development,skin development,integrin biosynthetic process,eye morphogenesis,regulation of cellular component organization,negative regulation of endodermal cell differentiation	extracellular matrix structural constituent,heparin binding,proteoglycan binding,platelet-derived growth factor binding	FALSE	69.6	0.197146	5.74859	7.0487e-05	0.000113581	52.6709	63.6417	55.2733	51.8218	NaN	36.828	85.496	34.2374	NaN	31.6337	61.8017	NaN	72.9781	52.6288	69.8433	68.2375	NaN	47.2746	66.0216	58.6903	NaN	51.9678	NaN	49.4081	68.3123	72.8682	66.9544	63.6133	NaN	59.5904	NaN	57.5838	48.4812	56.5086
F1S0J1	F1S0J1		Sus scrofa	Sushi domain-containing protein	1	1				FALSE	57.1	0.645686	8.55961	5.6644e-13	8.70649e-13	772.593	NaN	NaN	640.448	NaN	757.236	309.296	NaN	NaN	NaN	196.2	635.08	NaN	NaN	251.095	NaN	229.72	649.202	NaN	242.304	243.672	186.366	NaN	NaN	11.4979	NaN	676.246	1186.72	NaN	11.4789	667.052	NaN	236.338	720.243
F1S0J2	F1S0J2	C4BPA	Sus scrofa	Sushi domain-containing protein	34	68	extracellular space,other organism cell	positive regulation of protein catabolic process,negative regulation of complement activation, classical pathway		FALSE	100	0.125141	10.7558	1.77464e-17	5.98128e-17	1871.67	1377.45	2689.31	1844.34	1460.48	1742.11	1722.07	1921.61	1851.58	1530.43	1703.48	2105.57	2015.64	1499.96	1733.29	2212.67	1745.42	1756.25	1703.97	1745.82	1613.67	1741.44	1781.4	1508.78	1461.45	1512.41	1988.34	1401.17	1511.15	1687.77	1752.9	1726.82	1643.62	1428.55
F1S1B9	F1S1B9	DHRS11	Sus scrofa	Dehydrogenase/reductase 11	5	5		steroid biosynthetic process,oxidation-reduction process	3-keto sterol reductase activity,estradiol 17-beta-dehydrogenase activity,17-beta-ketosteroid reductase activity,17-beta-hydroxysteroid dehydrogenase (NADP+) activity	FALSE	20.5	0.687539	4.26701	1.52648e-07	2.83642e-07	NaN	NaN	NaN	73.2961	NaN	15.2842	NaN	NaN	NaN	NaN	NaN	NaN	NaN	NaN	NaN	NaN	NaN	NaN	NaN	NaN	7.87089	11.3162	14.5281	NaN	NaN	34.706	18.0007	NaN	9.05909	NaN	NaN	NaN	NaN	NaN
F1S268	F1S268	CREG1	Sus scrofa	Cellular repressor of E1A stimulateds 1	1	1	extracellular space,transcription factor complex	regulation of transcription, DNA-templated	transcription factor binding,cofactor binding	FALSE	39.3	0.522075	4.0306	1.83185e-05	3.0764e-05	NaN	NaN	NaN	12.2013	4.28867	27.3145	NaN	NaN	NaN	14.2805	15.3785	NaN	23.5999	20.3537	NaN	NaN	19.7642	NaN	10.8761	25.0874	NaN	NaN	NaN	NaN	NaN	3.44684	NaN	NaN	NaN	27.2701	NaN	NaN	NaN	NaN
F1S3H9	F1S3H9	LOC100517145	Sus scrofa	Complement C3	74	95	extracellular space	negative regulation of endopeptidase activity	endopeptidase inhibitor activity	FALSE	100	0.138251	7.46439	1.77464e-17	5.98128e-17	188.775	173.44	234.198	163.507	153.657	161.487	176.166	170.332	242.612	131.931	180.973	178.666	191.311	154.073	176.413	210.737	179.884	172.296	171.765	170.165	182.099	178.137	216.078	188.776	159.724	188.927	218.552	194.815	119.563	220.451	264.181	169.95	174.764	167.136
F1S3J9	F1S3J9	ICAM1	Sus scrofa	Intercellular adhesion molecule 1	1	1	immunological synapse,integral component of plasma membrane,external side of plasma membrane,extracellular matrix,membrane raft,extracellular exosome	T cell activation via T cell receptor contact with antigen bound to MHC molecule on antigen presenting cell,T cell antigen processing and presentation,positive regulation of cellular extravasation,cell adhesion,leukocyte cell-cell adhesion,membrane to membrane docking,regulation of cell adhesion,cell adhesion mediated by integrin,receptor-mediated virion attachment to host cell,leukocyte migratio…	integrin binding	FALSE	19.6	0.710674	1.70788	1.42928e-12	2.21297e-12	2.70586	NaN	1.64937	NaN	4.92658	NaN	NaN	NaN	2.69132	1.53206	2.41354	NaN	NaN	NaN	NaN	NaN	NaN	NaN	NaN	NaN	NaN	NaN	NaN	NaN	NaN	NaN	NaN	NaN	2.81595	NaN	5.74636	NaN	NaN	NaN
F1S3P6;O19113	F1S3P6;O19113	CCN2	Sus scrofa	Cellular communication network factor 2;CCN family member 2	13	15	;proteinaceous extracellular matrix	;regulation of cell growth,cell adhesion,signal transduction,cell-cell signaling,negative regulation of cell death,DNA biosynthetic process	;integrin binding,insulin-like growth factor binding,heparin binding	FALSE	100	0.317256	5.40923	5.9532e-16	1.28672e-15	45.3339	60.0401	63.6425	37.2631	28.1743	33.1712	52.7038	46.6187	77.879	50.8316	41.8025	85.7756	66.5081	37.4451	49.5418	52.0334	34.4243	37.9454	35.4937	44.2772	46.7389	46.6532	28.0619	67.5396	56.9102	60.9327	16.7082	57.8842	30.1612	30.8191	48.3628	67.9871	40.8911	47.562
F1S3Q8	F1S3Q8	VNN3	Sus scrofa	Pantetheinase	15	22	extracellular space	pantothenate metabolic process	pantetheine hydrolase activity	FALSE	100	0.187247	6.84146	7.00424e-16	1.48936e-15	105.995	76.0649	67.8774	71.0723	111.738	114.02	116.748	115.808	116.695	112.321	115.468	127.79	124.882	120.056	109.646	129.8	115.685	110.867	121.857	117.827	127.195	113.399	181.509	98.4245	87.2788	114.11	163.239	121.734	142.156	121.898	107.765	88.147	107.48	122.946
F1S3T0	F1S3T0	GNPDA2	Sus scrofa	Glucosamine-6-phosphate isomerase	1	1	cytoplasm	carbohydrate metabolic process,N-acetylglucosamine metabolic process	glucosamine-6-phosphate deaminase activity	FALSE	6.2	0.374288	4.59165	6.30024e-05	0.000101918	NaN	NaN	NaN	NaN	NaN	NaN	NaN	NaN	NaN	NaN	27.425	NaN	NaN	NaN	NaN	NaN	NaN	23.8885	NaN	NaN	NaN	NaN	28.258	NaN	NaN	NaN	NaN	NaN	NaN	NaN	NaN	NaN	NaN	NaN
F1S3U9	F1S3U9	PRDX1	Sus scrofa	Peroxiredoxin-1	2	2				FALSE	8.9	0.842162	4.53253	0.00027411	0.000418186	NaN	NaN	NaN	73.6943	NaN	NaN	NaN	26.7216	NaN	NaN	NaN	NaN	NaN	NaN	NaN	NaN	NaN	NaN	NaN	10.1928	NaN	NaN	31.2769	NaN	NaN	NaN	NaN	NaN	NaN	NaN	NaN	NaN	35.1541	NaN
F1S412	F1S412	CRIM1	Sus scrofa	Cysteine rich transmembrane BMP regulator 1	1	1	extracellular region,integral component of membrane	regulation of cell growth,negative regulation of endopeptidase activity	serine-type endopeptidase inhibitor activity,insulin-like growth factor binding,PDZ domain binding	FALSE	97.3	0.14833	8.79909	4.21655e-07	7.67269e-07	455.601	436.29	384.86	508.273	561.996	453.122	410.278	401.683	603.833	369	347.368	300.161	383.501	447.929	483.783	473.346	466.37	419.899	427.029	405.094	483.117	NaN	550.294	304.019	385.155	352.958	510.154	615.634	494.675	410.832	478.125	NaN	478.214	414.642
F1S475	F1S475	PLCG2	Sus scrofa	1-phosphatidylinositol 4,5-bisphosphate phosphodiesterase gamma	1	1	intracellular	phospholipid catabolic process,intracellular signal transduction	phosphatidylinositol phospholipase C activity,signal transducer activity	FALSE	59.8	0.273381	5.63506	0.000793847	0.00114703	NaN	72.348	NaN	NaN	50.5817	NaN	NaN	NaN	95.9448	65.3604	60.8789	58.4804	NaN	54.7862	NaN	56.899	71.8043	NaN	60.7105	38.282	35.534	NaN	NaN	64.6945	39.9416	38.6836	NaN	NaN	49.7346	NaN	66.932	33.0555	38.9234	NaN
F1S4I1	F1S4I1	GOLM1	Sus scrofa	Golgi membrane protein 1	19	30				FALSE	100	0.150374	8.45956	1.77464e-17	5.98128e-17	283.242	404.958	361.119	325.28	272.987	276.535	361.792	376.044	394.409	479.649	367.427	361.886	388.24	507.972	376.738	357.372	312.385	425.154	347.397	321.45	376.789	351.341	244.55	429.03	410.422	384.882	402.97	289.94	261.349	286.857	326.653	423.076	324.089	407.482
F1S4K7	F1S4K7	PGM2	Sus scrofa	Phosphoglucomutase 2	3	3	cytosol	glucose metabolic process	magnesium ion binding,phosphoglucomutase activity,phosphopentomutase activity	FALSE	16.1	0.768273	4.1648	1.24478e-07	2.32257e-07	NaN	NaN	NaN	75.0034	NaN	NaN	NaN	NaN	NaN	NaN	NaN	NaN	NaN	NaN	NaN	NaN	NaN	NaN	NaN	NaN	36.209	NaN	20.6859	NaN	NaN	NaN	20.404	NaN	NaN	NaN	NaN	NaN	NaN	NaN
F1S4Q6	F1S4Q6	CEBPZ	Sus scrofa	CCAAT enhancer binding protein zeta	1	1	nucleus			FALSE	39.3	0.347491	4.57582	7.61433e-06	1.3064e-05	22.6405	23.1835	NaN	37.9323	37.4439	NaN	NaN	17.6381	NaN	NaN	28.5216	NaN	19.0916	NaN	NaN	NaN	NaN	NaN	29.5206	25.1343	23.4392	28.3132	NaN	28.257	NaN	17.9491	NaN	NaN	NaN	NaN	NaN	31.0679	NaN	NaN
F1S567	F1S567	VCAM1	Sus scrofa	Vascular cell adhesion molecule 1	15	20	podosome,extracellular space,early endosome,endoplasmic reticulum,Golgi apparatus,microvillus,external side of plasma membrane,integral component of membrane,filopodium,apical part of cell,alpha9-beta1 integrin-vascular cell adhesion molecule-1 complex	heterophilic cell-cell adhesion via plasma membrane cell adhesion molecules,cell-matrix adhesion,amine metabolic process,membrane to membrane docking,calcium-mediated signaling using intracellular calcium source,positive regulation of T cell proliferation,leukocyte tethering or rolling,oxidation-reduction process	integrin binding,primary amine oxidase activity	FALSE	100	0.132667	6.35774	1.77464e-17	5.98128e-17	87.7632	83.9639	63.7459	89.6196	103.008	99.2369	75.5094	76.8793	73.6273	108.723	83.6637	84.9166	74.0705	88.7585	73.5333	77.0961	86.5047	101.686	81.2686	85.5096	73.5606	81.3354	91.5678	86.5698	89.7829	82.8009	73.2127	94.4098	110.53	98.8174	69.5622	77.213	85.1943	94.6347
F1S573	F1S573		Sus scrofa	Alpha-amylase	3	3		carbohydrate metabolic process	alpha-amylase activity,cation binding,Requires Ontology	FALSE	97.3	0.300017	6.32286	2.05928e-16	4.99877e-16	96.3629	89.5044	94.8748	48.5144	69.8346	99.5386	84.5937	110.741	67.1436	71.2447	86.6671	90.0098	117.56	88.6225	74.8996	135.074	71.853	40.0731	79.2091	56.2085	94.385	82.8855	117.753	118.066	123.548	106.113	86.1682	69.9737	83.1559	79.0189	50.9715	129.927	80.7209	52.9273
F1S574;P00690	F1S574;P00690	AMY2	Sus scrofa	Alpha-amylase;Pancreatic alpha-amylase	17	21	;extracellular space	carbohydrate metabolic process;carbohydrate catabolic process	alpha-amylase activity,cation binding,Requires Ontology;alpha-amylase activity,calcium ion binding,chloride ion binding,Requires Ontology	FALSE	100	0.191185	7.02191	1.77464e-17	5.98128e-17	144.385	179.167	144.706	125.749	112.527	164.479	134.766	152.184	123.924	112.996	124.14	168.316	136.293	107.566	143.161	153.812	116.229	112.41	153.454	137.903	135.906	141.772	169.636	166.086	168.553	170.181	183.387	130.354	131.746	146.149	92.0608	162.442	135.053	122.111
F1S6B5;Q9TTB4	F1S6B5;Q9TTB4	FMOD	Sus scrofa	Fibromodulin;Fibromodulin (Fragment)	1	1	proteinaceous extracellular matrix,extracellular space;proteinaceous extracellular matrix,extracellular space	collagen fibril organization;axonogenesis	;	FALSE	73.2	0.341912	5.11381	3.20139e-08	6.12183e-08	47.3739	59.9762	27.3981	28.7833	26.4389	29.455	35.9826	24.9934	NaN	NaN	21.1808	34.7753	32.2101	51.3016	13.7111	41.759	34.7359	48.5134	33.0917	33.3507	NaN	NaN	39.3458	46.5418	NaN	35.262	48.6004	21.2678	48.9124	41.123	NaN	39.8378	46.7197	NaN
F1S6Q3	F1S6Q3	CILP2	Sus scrofa	Cartilage intermediate layer protein 2	11	13				FALSE	100	0.16811	5.52554	2.91622e-15	5.46409e-15	34.5396	53.0644	40.5232	46.8273	38.1681	55.8588	51.4961	54.2463	51.8935	45.15	42.6684	52.6164	52.5695	45.5933	44.762	52.7285	38.004	41.9535	59.5857	40.4579	49.7736	36.0056	53.0906	48.256	50.3759	56.89	50.3255	54.1559	39.8751	39.5201	33.5153	43.4784	46.113	60.1459
F1S6Z3	F1S6Z3	ABRACL	Sus scrofa	Costars family protein ABRACL	2	2	integral component of membrane			FALSE	76.8	0.553717	4.60487	1.15829e-09	2.20974e-09	5.29181	51.894	NaN	88.6638	12.044	NaN	30.8416	34.1476	11.8563	9.08926	19.2283	19.8165	12.1744	18.3271	9.82106	18.518	43.0737	4.12993	NaN	26.3006	27.0791	24.5565	60.3809	NaN	16.4285	37.1461	14.9084	NaN	40.1502	17.0268	53.9212	NaN	24.7236	NaN
F1S788	F1S788	C8A	Sus scrofa	Complement C8 alpha chain	29	55	membrane attack complex	complement activation		FALSE	100	0.127627	8.8972	1.77464e-17	5.98128e-17	426.177	357.707	386.455	577.208	466.084	467.335	459.766	463.801	493.565	399.001	483.772	403.049	395.504	455.464	472.631	436.697	479.956	514.295	626.006	487.611	451.525	470.662	619.645	353.553	500.938	518.658	524.022	476.64	431.071	494.807	420.369	541.473	433.868	553.888
F1S7Z7	F1S7Z7	ANGPTL3	Sus scrofa	Angiopoietin like 3	9	10	extracellular space,early endosome,Golgi apparatus,cell surface	glycerol metabolic process,fatty acid metabolic process,cell-matrix adhesion,signal transduction,cholesterol metabolic process,phospholipid catabolic process,regulation of receptor activity,negative regulation of phospholipase activity,lipid storage,positive regulation of cell migration,cholesterol homeostasis,positive regulation of angiogenesis,artery morphogenesis,positive regulation of lipid c…	phospholipase inhibitor activity,integrin binding,growth factor activity	FALSE	100	0.186076	4.75478	1.00987e-12	1.55728e-12	26.2875	29.3889	28.1925	26.8256	40.7822	33.563	22.8841	30.3896	40.6914	19.6347	25.8951	26.6889	20.2971	24.196	34.3981	32.5932	28.8225	24.4871	30.9238	28.3704	33.6431	23.5631	35.7745	38.1404	15.3192	21.7163	26.9557	28.4655	27.5272	33.0361	19.9334	29.6577	30.2451	38.1693
F1S8H8	F1S8H8	PNP	Sus scrofa	Purine nucleoside phosphorylase	14	19	cytosol	inosine catabolic process,nicotinamide riboside catabolic process,immune response,NAD biosynthesis via nicotinamide riboside salvage pathway,urate biosynthetic process,positive regulation of T cell proliferation,response to drug,positive regulation of alpha-beta T cell differentiation,interleukin-2 secretion	nucleoside binding,purine nucleobase binding,purine-nucleoside phosphorylase activity,drug binding,phosphate ion binding	FALSE	58	1.67288	4.26643	2.61278e-14	4.28125e-14	NaN	10.0799	NaN	366.759	18.8005	29.7205	15.9608	10.956	NaN	NaN	19.8458	NaN	NaN	NaN	18.9487	18.642	16.6261	NaN	NaN	16.0453	17.549	15.1813	49.8993	NaN	NaN	NaN	53.5465	NaN	13.2528	6.09446	24.249	NaN	14.0997	13.3642
F1S8V7	F1S8V7	CPN1	Sus scrofa	Carboxypeptidase N catalytic chain	15	29	extracellular space,Golgi apparatus,secretory granule,neuronal cell body,synaptic membrane	insulin processing	metallocarboxypeptidase activity,serine-type carboxypeptidase activity,zinc ion binding	FALSE	100	0.0752345	7.87084	1.77464e-17	5.98128e-17	237.883	201.664	258.87	257.715	256.673	221.884	222.851	227.155	207.435	261.133	228.033	207.508	248.653	237.172	234.332	218.793	234.011	243.871	224.547	225.89	233.075	232.543	254.842	194.935	208.434	205.475	253.143	215.352	239.756	259.99	258.858	233.918	225.524	254.345
F1S902	F1S902	COMP	Sus scrofa	Cartilage oligomeric matrix protein	16	17	extracellular space,extracellular matrix	growth plate cartilage development,cell adhesion,extracellular matrix organization,negative regulation of apoptotic process,limb development	protease binding,calcium ion binding,collagen binding,heparin binding,heparan sulfate proteoglycan binding	FALSE	100	0.136362	5.79249	2.30619e-15	4.40272e-15	48.0972	70.8034	54.3804	56.3404	48.2559	51.6835	63.2199	56.1493	57.7629	49.9629	55.4066	39.5504	60.2963	52.9356	57.0523	63.0115	56.3109	59.2878	50.3645	52.6105	56.8436	54.5711	54.0635	62.746	64.2494	62.1738	54.8033	65.7514	50.1742	53.0777	39.6566	44.6947	60.052	55.3687
F1S9H7	F1S9H7		Sus scrofa	Ig-like domain-containing protein	4	9	extracellular space	immunoglobulin production,immune response		FALSE	100	0.466683	10.814	7.59564e-13	1.16877e-12	1528.02	1914.76	2395.83	1067.67	1771.14	1741.17	1910.3	2351.68	1030.06	2722.84	1973.79	1228.55	1388.76	1773.99	1894.14	2471.98	2076.31	1507.13	2032.74	2041.85	1971.84	2022.34	1060.93	1968.17	2138.44	2098.17	1665.52	1768.12	2139.8	1869.91	2590.89	2063.96	1971.78	6601.26
F1SAE9	F1SAE9	LAMB1	Sus scrofa	Laminin subunit beta 1	18	18	laminin-1 complex,laminin-2 complex,extracellular space,laminin-8 complex,laminin-10 complex	neuronal-glial interaction involved in cerebral cortex radial glia guided migration,positive regulation of cell migration,neuron projection development,substrate adhesion-dependent cell spreading,endodermal cell differentiation,odontogenesis	extracellular matrix structural constituent	FALSE	100	0.155439	5.7701	1.46258e-13	2.27222e-13	48.7239	59.1554	55.1749	57.6714	52.189	55.281	51.0563	63.7051	61.6396	62.5656	47.9184	59.1536	60.5239	58.2767	58.1336	60.4632	47.805	53.3038	60.8244	63.057	60.2534	61.4134	57.6082	67.8341	48.3696	51.7924	64.22	53.4886	54.1058	57.1609	27.2361	65.4175	50.2383	69.2896
F1SAT8	F1SAT8	CD93	Sus scrofa	CD93 molecule	12	14	plasma membrane,cell surface,integral component of membrane,cytoplasmic vesicle	cell-cell adhesion	complement component C1q binding,calcium ion binding	FALSE	100	0.195086	6.39702	7.18459e-14	1.13472e-13	95.5125	112.572	86.7267	78.874	91.6208	74.7601	78.9463	119.554	66.713	90.7082	80.2694	117.488	74.789	119.147	84.0271	76.1991	92.3957	103.194	83.4155	79.6675	84.0827	94.0003	95.9142	95.0199	100.276	78.2723	45.3704	95.7763	82.7901	97.3457	70.3599	85.3717	82.4966	110.792
F1SAW5	F1SAW5	TSPAN2	Sus scrofa	Tetraspanin	1	1	integral component of plasma membrane,myelin sheath	inflammatory response,cell surface receptor signaling pathway,astrocyte development,microglia development,myelination,oligodendrocyte differentiation,axon development		FALSE	89.3	0.233533	5.61699	1.38454e-08	2.67417e-08	57.7661	NaN	38.1899	27.6973	52.1374	54.698	43.3503	47.6664	44.7543	33.7068	52.4253	49.803	52.3305	NaN	52.2402	51.7549	54.2165	NaN	58.551	52.4696	35.0159	47.9432	36.2213	52.9549	39.5754	27.2433	55.8642	43.3795	53.9402	45.2015	66.7812	51.027	64.8966	49.2858
F1SB42	F1SB42	EZR	Sus scrofa	Ezrin	2	2	fibrillar center,ruffle,immunological synapse,uropod,endosome,cytosol,actin filament,microvillus,brush border,focal adhesion,extrinsic component of membrane,filopodium,macromolecular complex,ciliary basal body,myelin sheath,plasma membrane raft,perinuclear region of cytoplasm,invadopodium,cytoplasmic side of apical plasma membrane	negative regulation of transcription from RNA polymerase II promoter,intestinal D-glucose absorption,sphingosine-1-phosphate signaling pathway,leukocyte cell-cell adhesion,regulation of cell shape,positive regulation of gene expression,protein kinase A signaling,membrane to membrane docking,microvillus assembly,astral microtubule organization,actin cytoskeleton reorganization,receptor internaliza…	microtubule binding,protein C-terminus binding,protein kinase A catalytic subunit binding,protein kinase A regulatory subunit binding,identical protein binding,S100 protein binding,cadherin binding,actin filament binding,ATPase binding,disordered domain specific binding	FALSE	29.5	0.671924	3.09455	1.13943e-06	2.03236e-06	NaN	NaN	NaN	36.9918	9.3624	NaN	9.10471	NaN	NaN	NaN	NaN	2.75536	NaN	NaN	NaN	4.25401	NaN	NaN	NaN	NaN	NaN	11.5445	NaN	NaN	NaN	7.81743	NaN	NaN	NaN	NaN	9.04631	7.41689	NaN	NaN
F1SB67	F1SB67	IGF2R	Sus scrofa	Insulin like growth factor 2 receptor	12	12	nuclear envelope lumen,early endosome,late endosome,trans-Golgi network,cell surface,integral component of membrane,endocytic vesicle,trans-Golgi network transport vesicle	lysosomal transport	receptor activity,insulin-like growth factor binding,mannose binding,identical protein binding,phosphoprotein binding	FALSE	100	0.148248	4.94374	1.51409e-12	2.3462e-12	29.4779	36.6827	23.5367	33.5417	31.6	22.9811	28.9709	33.0041	24.3554	40.0939	25.8772	33.5717	39.3557	39.6011	28.5737	26.6665	24.898	27.0055	27.9064	31.7222	33.3349	35.0171	35.1973	33.5951	34.1821	39.1521	33.1964	40.3984	38.7357	28.1306	29.238	33.4013	30.7033	24.732
F1SC51	F1SC51	PDLIM1	Sus scrofa	PDZ and LIM domain 1	5	6	transcription factor complex,cytoskeleton,cell-cell adherens junction	regulation of transcription, DNA-templated,cell-cell adhesion	transcription coactivator activity,metal ion binding,cadherin binding involved in cell-cell adhesion	FALSE	67.9	0.659889	3.79904	3.06378e-13	4.7166e-13	NaN	21.4446	NaN	46.8726	20.7293	NaN	11.7864	15.0429	9.23606	12.0663	13.2991	18.444	NaN	9.61966	14.266	NaN	14.3782	NaN	NaN	21.0088	11.8858	10.9179	63.871	NaN	12.2505	9.10197	6.0922	NaN	13.4361	5.62797	50.1869	NaN	14.3824	NaN
F1SC57	F1SC57	PLTP	Sus scrofa	Phospholipid transfer protein	13	17	high-density lipoprotein particle	lipid metabolic process,vitamin E biosynthetic process,positive regulation of cholesterol efflux,phospholipid transport,flagellated sperm motility,high-density lipoprotein particle remodeling,ceramide transport	phosphatidylethanolamine binding,phosphatidylcholine transporter activity,diacylglycerol binding,phosphatidylcholine binding,ceramide transporter activity,phosphatidic acid binding,ceramide binding,phosphatidylglycerol binding,phosphatidylethanolamine transporter activity,phosphatidic acid transporter activity	FALSE	100	0.135373	6.28414	4.59427e-14	7.36074e-14	70.5017	95.5784	61.9017	66.8831	80.491	72.157	84.2347	71.3885	95.0987	78.1739	73.5163	67.108	80.7985	70.824	77.5297	71.208	84.6332	84.3299	72.3594	71.9795	83.1545	79.5222	92.061	86.8541	57.22	58.6183	83.6892	57.6635	81.2779	66.8899	96.2869	54.5737	76.813	94.5857
F1SCC7	F1SCC7		Sus scrofa	Serpin domain-containing protein	14	36	extracellular space	negative regulation of endopeptidase activity	serine-type endopeptidase inhibitor activity	FALSE	100	0.309064	11.209	4.48662e-15	8.1403e-15	1966.27	3188.43	3219.19	1993.8	2801.14	1643.26	2113.47	2812.02	4026.75	2136.83	2167.52	3086.65	1624.47	3329.13	2345.6	1729.81	2279.98	3876.73	1918.33	2198.73	2301.18	2287.79	1135.66	5105.2	4162.89	2604.34	2851.52	2117.23	2615.11	2149.72	2612.37	3751.77	2245.82	2140.74
F1SCC9	F1SCC9	LOC106504545	Sus scrofa	Serpin domain-containing protein	14	40	extracellular space	negative regulation of endopeptidase activity	serine-type endopeptidase inhibitor activity	FALSE	100	0.171339	11.0855	1.77464e-17	5.98128e-17	2101.86	2974.21	1941.45	2266.19	2057.56	2152.1	2052.16	2044.27	2435.06	980.625	1975.64	2863.02	2057.35	2288.91	1899.85	2010.96	1914.04	2637.5	2107.55	1900.69	1956.92	1821.5	3078.01	2634.81	2161.67	2189.4	2534.83	2049.42	2977.27	1847.65	2766.11	1973.87	1978.22	2139.68
F1SCD0	F1SCD0	LOC396685	Sus scrofa	Serpin domain-containing protein	34	90				FALSE	100	0.207834	13.8552	3.02209e-15	5.64678e-15	17855.8	19697	16689.4	19182.1	14251.5	17776	15208.6	12310.7	13903.7	14282	14489.7	9619.64	20087.4	17611.7	14135.2	16745.3	14035.3	17314.6	16531.2	14011.3	15071.2	14423.3	11463.1	18389.2	14526.9	14875.8	14536.6	17579.6	28319.7	16136.4	13297.7	13913	14752.8	15323.3
F1SCF1;Q9GK37	F1SCF1;Q9GK37	SERPINA6;Serpina6	Sus scrofa	Serpin family A member 6;Corticosteroid-binding globulin	14	27	extracellular space;extracellular space	negative regulation of endopeptidase activity;negative regulation of endopeptidase activity	serine-type endopeptidase inhibitor activity;serine-type endopeptidase inhibitor activity,steroid binding	FALSE	100	0.224628	7.86666	1.54281e-15	3.04719e-15	205.116	234.32	159.252	327.309	163.72	171.239	234.95	355.476	282.157	195.2	236.6	245.868	229.715	150.742	259.363	289.657	247.415	248.181	265.021	246.179	250.787	249.651	234.107	203.144	216.595	272.84	295.946	222.18	92.1936	180.613	85.8756	222.763	241.084	227.568
F1SCI4	F1SCI4		Sus scrofa	A-kinase anchor protein 13	1	1	intracellular	protein phosphorylation,regulation of Rho protein signal transduction,intracellular signal transduction,regulation of molecular function	cAMP-dependent protein kinase activity,Rho guanyl-nucleotide exchange factor activity,metal ion binding	FALSE	100	0.23936	5.9807	9.051e-13	1.39439e-12	60.0208	73.0683	84.9269	66.3268	46.1871	59.1587	61.0837	62.7621	65.5957	60.8921	71.935	59.9848	68.0003	93.5619	55.3039	87.6668	64.8764	63.2121	85.7119	72.7342	62.7915	50.4495	68.176	91.5167	61.9533	71.4051	66.0166	81.7984	83.2928	61.3396	24.5784	54.1912	74.9337	66.002
F1SDL3	F1SDL3	DNAJC27	Sus scrofa	DnaJ homolog subfamily C member 27	1	1			GTPase activity,GTP binding	FALSE	20.5	0.844858	1.66133	3.42845e-05	5.65624e-05	NaN	NaN	NaN	NaN	NaN	NaN	1.85994	1.66804	NaN	NaN	9.31533	NaN	NaN	2.52024	NaN	NaN	3.52882	NaN	NaN	NaN	7.31552	NaN	NaN	NaN	NaN	12.3221	NaN	NaN	1.87156	1.19327	NaN	4.28532	NaN	NaN
F1SEX2	F1SEX2	ZNHIT6	Sus scrofa	Zinc finger HIT-type containing 6	1	1				FALSE	25	0.442083	4.54123	0.00081219	0.00117199	14.0827	NaN	NaN	NaN	13.2378	NaN	NaN	NaN	20.0574	NaN	42.2423	34.7653	NaN	16.0832	NaN	NaN	23.4309	NaN	NaN	NaN	NaN	NaN	NaN	NaN	27.4737	NaN	NaN	NaN	NaN	NaN	3.86008	NaN	NaN	NaN
F1SFA7	F1SFA7	COL1A2	Sus scrofa	Collagen type I alpha 2 chain	9	10				FALSE	100	0.256516	5.00974	5.61508e-16	1.2209e-15	35.3302	35.8891	34.8382	25.9644	21.9469	28.8443	31.0033	36.8012	30.7962	22.8884	35.5381	19.9365	30.2673	26.9532	31.3395	36.3925	39.2033	24.3348	48.2147	32.694	33.7351	29.7465	34.575	42.3739	43.2337	35.8608	41.05	34.5793	24.8524	38.341	18.0443	31.5999	33.8527	31.4066
F1SFI6	F1SFI6	FETUB	Sus scrofa	Fetuin B	22	41	extracellular region	binding of sperm to zona pellucida,negative regulation of endopeptidase activity	cysteine-type endopeptidase inhibitor activity,metalloendopeptidase inhibitor activity	FALSE	100	0.193422	11.5103	1.77464e-17	5.98128e-17	2529.93	2514.61	1661.53	2924.63	3113.39	2565.62	2954.49	4114.5	2006.84	3220.05	2886.42	2252.38	3809.81	2631.36	2772.9	2889.51	2882.25	2218.58	3371.75	2720.42	2763.37	2870.96	3979.63	1893.24	2679.58	2599.08	2957.92	2258.61	2534.04	2540.16	1583.1	2791.39	2859.34	3227.4
F1SG97	F1SG97	KLHL42	Sus scrofa	Kelch like family member 42	1	1	Cul3-RING ubiquitin ligase complex	protein polyubiquitination,regulation of microtubule-based process,proteasome-mediated ubiquitin-dependent protein catabolic process	ubiquitin-protein transferase activity	FALSE	20.5	0.275177	5.60221	0.00092161	0.00132007	35.5886	NaN	NaN	NaN	73.8286	NaN	NaN	43.5222	NaN	NaN	NaN	NaN	NaN	NaN	NaN	NaN	41.8192	63.2547	NaN	NaN	NaN	NaN	NaN	NaN	41.8631	30.1693	NaN	NaN	NaN	NaN	42.0004	NaN	32.6473	NaN
F1SGD7	F1SGD7	NAP1L1	Sus scrofa	Nucleosome assembly protein 1 like 1	6	6	nucleus	nucleosome assembly		FALSE	28.6	1.01614	3.93869	1.21845e-07	2.27443e-07	NaN	NaN	NaN	92.038	NaN	10.7612	12.9694	21.6301	NaN	NaN	NaN	NaN	93.2076	NaN	11.9137	NaN	17.3774	NaN	NaN	NaN	10.6023	NaN	18.0555	NaN	NaN	NaN	17.5009	NaN	NaN	NaN	12.1012	NaN	15.5362	NaN
F1SGG6	F1SGG6	KRT5	Sus scrofa	Keratin 5	3	3	mitochondrion,plasma membrane,keratin filament		structural molecule activity,scaffold protein binding	FALSE	28.6	0.53336	3.89193	2.73262e-13	4.21052e-13	6.53232	NaN	NaN	NaN	NaN	9.79624	13.5483	NaN	NaN	NaN	NaN	NaN	9.67794	23.1149	18.1157	NaN	NaN	22.6391	NaN	NaN	22.3773	NaN	NaN	NaN	NaN	NaN	NaN	NaN	NaN	NaN	NaN	NaN	NaN	NaN
F1SGH0	F1SGH0	PTPRG	Sus scrofa	protein-tyrosine-phosphatase	8	8	integral component of membrane	negative regulation of epithelial cell migration,peptidyl-tyrosine dephosphorylation	protein tyrosine phosphatase activity,identical protein binding	FALSE	100	0.136021	5.78391	2.94428e-17	9.21159e-17	53.0431	52.6547	51.1339	63.1511	50.0215	58.2141	40.1158	58.325	59.2051	55.4061	45.351	53.5401	51.4766	62.1767	59.8508	58.8882	54.0443	61.8171	69.3123	54.4816	55.7847	53.5309	68.6658	50.6638	49.0544	47.6082	56.5705	54.9947	60.3953	72.3873	50.763	45.5915	59.0915	58.3105
F1SGM3;Q863Z0	F1SGM3;Q863Z0	PSME2	Sus scrofa	Proteasome activator subunit 2;Proteasome activator complex subunit 2	2	2	proteasome activator complex;proteasome complex,cytoplasm,proteasome activator complex	;positive regulation of endopeptidase activity,regulation of proteasomal protein catabolic process,regulation of G1/S transition of mitotic cell cycle	identical protein binding;endopeptidase activator activity	FALSE	42.9	0.898846	3.39044	1.55477e-05	2.62227e-05	NaN	NaN	NaN	80.2476	NaN	7.3928	NaN	17.4271	NaN	NaN	NaN	NaN	NaN	NaN	4.30772	NaN	18.2627	NaN	NaN	9.66484	11.1373	3.84665	20.5129	NaN	NaN	NaN	NaN	6.81405	11.3012	6.02055	20.887	11.1759	11.3362	NaN
F1SGS9	F1SGS9	CAT	Sus scrofa	Catalase	29	47	mitochondrion,peroxisomal membrane	response to reactive oxygen species,triglyceride metabolic process,cholesterol metabolic process,aerobic respiration,UV protection,positive regulation of phosphatidylinositol 3-kinase signaling,hemoglobin metabolic process,negative regulation of NF-kappaB transcription factor activity,hydrogen peroxide catabolic process,negative regulation of apoptotic process,positive regulation of NF-kappaB tra…	aminoacylase activity,catalase activity,receptor binding,enzyme binding,heme binding,protein homodimerization activity,metal ion binding,NADP binding	FALSE	100	1.12967	5.50734	1.77464e-17	5.98128e-17	32.6516	48.5576	23.1778	621.909	61.2315	59.5027	51.7371	49.4029	28.3792	45.2943	54.8104	30.8799	21.9716	30.2344	57.9912	49.0723	53.7703	22.5474	37.6387	55.6893	58.6222	51.5255	138.098	32.625	23.4495	38.6294	132.536	25.1089	53.4691	32.4624	89.0577	22.6133	59.5508	39.3742
F1SGT4	F1SGT4	CD44	Sus scrofa	CD44 antigen	3	4	Golgi apparatus,cytosol,plasma membrane,cell surface,integral component of membrane,basolateral plasma membrane,apical plasma membrane,lamellipodium membrane,macrophage migration inhibitory factor receptor complex	cytokine-mediated signaling pathway,hyaluronan catabolic process,positive regulation of peptidyl-serine phosphorylation,positive regulation of heterotypic cell-cell adhesion,negative regulation of cysteine-type endopeptidase activity involved in apoptotic process,negative regulation of DNA damage response, signal transduction by p53 class mediator,wound healing, spreading of cells,cellular respon…	cytokine receptor activity,hyaluronic acid binding	FALSE	100	0.16843	6.15041	1.77464e-17	5.98128e-17	104.346	81.7473	66.7461	53.9431	79.9816	86.7233	63.7318	85.2673	81.7399	91.6658	73.4465	77.6202	86.5076	56.651	75.7636	65.6879	65.6289	91.0006	58.2778	63.3725	70.9585	70.1371	67.4163	83.4445	83.6362	73.8633	80.805	88.5695	84.9746	71.7202	70.1812	80.1713	60.7711	72.4327
F1SH33	F1SH33	SERPINI1	Sus scrofa	Serpin family I member 1	7	7	extracellular space,secretory granule lumen,neuronal cell body	negative regulation of endopeptidase activity	serine-type endopeptidase inhibitor activity	FALSE	98.2	0.319485	5.48218	7.70808e-15	1.34853e-14	71.7861	32.8466	45.4192	36.6135	57.637	54.1992	47.2882	35.0035	37.2324	31.5783	44.6718	83.5293	68.3593	68.6058	56.0568	45.8114	48.7074	46.1354	36.8937	45.7463	51.0012	43.9123	60.397	43.5449	69.8413	67.961	NaN	35.0924	56.4959	42.5666	42.3063	55.0137	45.7193	46.4886
F1SI48	F1SI48	EPB42	Sus scrofa	Erythrocyte membrane protein band 4.2	3	3	membrane,cortical cytoskeleton	cell morphogenesis,peptide cross-linking,hemoglobin metabolic process,spleen development,iron ion homeostasis	protein-glutamine gamma-glutamyltransferase activity	FALSE	21.4	0.358994	5.24562	2.4011e-06	4.22017e-06	NaN	NaN	NaN	70.6283	66.7314	NaN	NaN	NaN	NaN	NaN	29.9554	NaN	NaN	26.2697	NaN	NaN	NaN	NaN	NaN	NaN	NaN	NaN	NaN	NaN	NaN	31.4442	26.3588	NaN	NaN	NaN	NaN	NaN	58.4482	NaN
F1SIB1;Q19AZ8	F1SIB1;Q19AZ8	F2	Sus scrofa	Prothrombin	35	76	extracellular space,external side of plasma membrane;extracellular region	positive regulation of protein phosphorylation,proteolysis,acute-phase response,cell surface receptor signaling pathway,positive regulation of cell proliferation,regulation of cell shape,regulation of gene expression,positive regulation of phosphatidylinositol 3-kinase signaling,platelet activation,positive regulation of blood coagulation,positive regulation of cell growth,positive regulation of …	lipopolysaccharide binding,serine-type endopeptidase activity,receptor binding,calcium ion binding,heparin binding,thrombospondin receptor activity;serine-type endopeptidase activity,calcium ion binding	FALSE	100	0.0568509	10.7835	2.47922e-17	7.95213e-17	1672.01	2065.62	1656.55	1584.94	1675.57	1769.4	1739.74	1840.46	1611.64	1930.31	1706.75	1786.41	1810.06	1911.93	1747.14	1783.23	1702.77	1777.13	1702.37	1716.42	1699.11	1775.68	1614.64	1923.21	1723.72	1713.28	1977.83	1472.43	1813.31	1868.1	1804.39	1709.04	1705.86	1780.06
F1SIE1	F1SIE1	ISLR	Sus scrofa	Immunoglobulin superfamily containing leucine rich repeat	3	3	extracellular space	cell adhesion		FALSE	100	0.206423	4.96463	1.02667e-10	1.81871e-10	34.9296	26.4714	41.9192	18.3585	24.8483	29.1461	29.7603	18.9498	27.0602	37.8046	30.4271	31.0191	32.9606	30.5022	40.9355	40.2395	28.715	21.5512	25.6711	32.3724	36.1411	35.8679	38.885	37.8261	32.1619	15.6309	28.8258	55.2156	27.978	36.9534	32.6592	31.2778	30.8515	33.8972
F1SJ07	F1SJ07	PLEK	Sus scrofa	Pleckstrin	9	12	cytoplasm,ruffle membrane	hematopoietic progenitor cell differentiation,vesicle docking involved in exocytosis,integrin-mediated signaling pathway,positive regulation of platelet activation,negative regulation of inositol phosphate biosynthetic process,positive regulation of inositol-polyphosphate 5-phosphatase activity,positive regulation of actin filament depolymerization,phospholipase C-inhibiting G-protein coupled rec…	protein kinase C binding,protein homodimerization activity,phosphatidylinositol-3,4-bisphosphate binding	FALSE	73.2	0.742168	4.93957	4.8939e-09	9.48452e-09	26.8817	37.607	NaN	141.537	24.0596	9.99904	34.9928	19.0274	NaN	39.8286	27.7101	NaN	NaN	23.8795	22.6693	51.5946	28.7095	NaN	NaN	28.8654	42.1942	31.6353	156.732	32.8367	18.743	NaN	27.4699	NaN	39.5072	25.7805	138.811	NaN	29.4205	NaN
F1SJW8	F1SJW8	SERPING1	Sus scrofa	Plasma protease C1 inhibitor	23	62	extracellular space	negative regulation of endopeptidase activity,regulation of blood coagulation,negative regulation of complement activation	serine-type endopeptidase inhibitor activity	FALSE	100	0.0811405	10.6504	1.77464e-17	5.98128e-17	1804.54	1506.24	1686.44	1332.41	1909.79	1675.46	1643.74	1368.8	1555.12	1666.86	1547.65	1688.62	1513.78	1638.31	1596.75	1569.51	1698.71	1489.11	1752.75	1601.38	1475.36	1563.25	1628.54	1627.27	1689.27	1461.86	1551.51	1764.92	1669.67	1689.07	1686.34	1622.49	1614.01	1501.78
F1SL22	F1SL22	VWF	Sus scrofa	von Willebrand factor	118	185	endoplasmic reticulum,extracellular matrix,Weibel-Palade body	platelet activation,cell-substrate adhesion,protein homooligomerization	protease binding,integrin binding,collagen binding,immunoglobulin binding,protein homodimerization activity,protein N-terminus binding,chaperone binding	FALSE	100	0.128925	8.80435	1.77464e-17	5.98128e-17	447.445	519.854	521.301	458.057	417.209	399.524	425.489	368.709	553.212	469.89	445.689	526.638	421.965	519.965	449.904	436.611	456.947	570.797	425.603	454.907	471.247	438.213	519.19	584.578	519.939	473.272	367.527	372.298	478.476	422.06	660.407	495.229	423.971	430.823
F1SM14	F1SM14	SPP2	Sus scrofa	Secreted phosphoprotein 24	1	1	extracellular matrix	bone remodeling		FALSE	42.9	0.380819	4.98101	4.17326e-09	8.08366e-09	27.69	NaN	NaN	NaN	NaN	37.9885	NaN	31.7823	22.5847	NaN	4.84307	NaN	NaN	31.9642	22.1957	NaN	57.5413	NaN	NaN	NaN	NaN	NaN	48.4953	NaN	53.4865	27.4772	26.8108	NaN	NaN	NaN	NaN	47.9988	9.99928	NaN
F1SMC0	F1SMC0	CAP1	Sus scrofa	Adenylyl cyclase-associated protein	6	7	extracellular space,cortical actin cytoskeleton	cell morphogenesis,ameboidal-type cell migration,receptor-mediated endocytosis,actin cytoskeleton organization	actin binding	FALSE	58.9	0.747585	3.80132	4.43846e-07	8.06802e-07	4.96434	17.9276	NaN	65.3434	17.8867	12.4886	12.5849	15.544	NaN	17.5058	15.1503	NaN	10.7082	10.4541	NaN	11.3332	11.4864	9.45156	NaN	16.0493	18.4729	8.94826	60.2864	NaN	5.66883	NaN	11.2391	NaN	NaN	NaN	47.2386	NaN	7.79887	NaN
F1SMJ1	F1SMJ1	C7	Sus scrofa	Complement C7	46	79	membrane attack complex	complement activation		FALSE	100	0.102632	8.83603	1.77464e-17	5.98128e-17	465.579	541.064	376.482	432.679	466.926	455.51	450.098	395.654	433.471	527.285	434.823	403.204	441.225	498.831	466.54	392.6	451.133	428.109	397.897	462.703	476.359	464.341	420.919	549.429	531.859	501.784	405.003	502.374	413.84	475.689	559.164	467.974	459.36	534.651
F1SMW8	F1SMW8	SERPINB10	Sus scrofa	Serpin family B member 10	5	5	extracellular space	negative regulation of endopeptidase activity	serine-type endopeptidase inhibitor activity	FALSE	40.2	1.06101	3.59589	5.49839e-06	9.50119e-06	4.12091	NaN	NaN	62.8691	3.86187	5.87991	9.12309	5.95246	NaN	18.2395	NaN	NaN	NaN	10.2197	11.6037	NaN	NaN	NaN	NaN	8.01939	12.9572	12.675	61.8799	NaN	NaN	8.87098	NaN	NaN	8.54624	NaN	67.0415	NaN	11.68	NaN
F1SN77	F1SN77	OSMR	Sus scrofa	Oncostatin M receptor	2	2	oncostatin-M receptor complex,apical plasma membrane	positive regulation of cell proliferation,oncostatin-M-mediated signaling pathway	oncostatin-M receptor activity,growth factor binding	FALSE	75.9	0.387218	4.12415	1.62561e-07	3.01673e-07	NaN	10.6141	14.0278	32.3521	19.5392	25.6152	12.6872	26.11	13.4367	9.09797	19.4795	23.7004	NaN	19.3166	NaN	NaN	NaN	NaN	17.9396	17.3609	11.8297	22.0164	29.0715	5.58411	10.6966	22.8565	18.3808	12.0758	16.7691	14.8054	NaN	17.9679	20.5401	31.6921
F1SP55	F1SP55	ABCA1	Sus scrofa	ATP binding cassette subfamily A member 1	1	1	Golgi apparatus,integral component of plasma membrane,external side of plasma membrane,membrane raft,phagocytic vesicle,perinuclear region of cytoplasm	protein lipidation,phagocytosis, engulfment,lysosome organization,adenylate cyclase-activating G-protein coupled receptor signaling pathway,cholesterol metabolic process,positive regulation of cholesterol efflux,endosomal transport,intracellular cholesterol transport,regulation of Cdc42 protein signal transduction,cholesterol efflux,phospholipid efflux,high-density lipoprotein particle assembly,r…	receptor binding,ATP binding,anion transmembrane transporter activity,cholesterol transporter activity,syntaxin binding,small GTPase binding,apolipoprotein A-I binding,apolipoprotein A-I receptor activity,ATPase activity, coupled to transmembrane movement of substances,ATPase binding,phosphatidylcholine-translocating ATPase activity,phosphatidylserine-translocating ATPase activity	FALSE	35.7	0.444064	5.69403	0.000299324	0.000454802	109.077	NaN	NaN	46.8799	NaN	109.073	44.2467	25.5826	50.0942	NaN	34.2588	33.2047	NaN	NaN	NaN	NaN	NaN	NaN	67.132	31.1991	NaN	NaN	35.2353	NaN	NaN	NaN	NaN	37.1967	NaN	26.2198	NaN	NaN	NaN	NaN
F1SP97	F1SP97	CCDC191	Sus scrofa	Coiled-coil domain containing 191	1	2				TRUE	64.3	0.889839	4.05947	1.65432e-06	2.92913e-06	NaN	4.12213	17.7582	NaN	14.3251	8.23116	15.6005	NaN	NaN	22.502	43.3619	11.5351	NaN	NaN	NaN	NaN	NaN	10.8444	NaN	4.1488	10.3153	6.52348	NaN	25.4494	NaN	NaN	NaN	12.045	9.94975	14.0364	NaN	NaN	41.7315	29.3302
F1SPS6	F1SPS6	MST1	Sus scrofa	Hepatocyte growth factor-like protein	22	25	extracellular space,vacuole	proteolysis,embryo implantation,positive regulation of gene expression,regulation of macrophage chemotaxis,positive regulation of mammary gland epithelial cell proliferation,regulation of JAK-STAT cascade,mammary duct terminal end bud growth,negative regulation of epithelial cell apoptotic process	serine-type endopeptidase activity	FALSE	100	0.108203	5.77221	1.10051e-16	2.88249e-16	51.0562	60.2308	51.5748	64.0838	49.7873	47.4223	51.9458	49.9394	42.7036	48.4802	54.5748	51.1473	62.982	53.8242	47.9857	51.211	53.6099	59.0719	58.4626	58.9362	53.949	56.966	62.1967	53.7082	65.6674	66.6527	56.7468	56.5463	60.0639	51.7642	61.2422	65.5206	57.0836	65.336
F1SQ09	F1SQ09	LUM	Sus scrofa	Lumican	15	28	proteinaceous extracellular matrix,fibrillar collagen trimer,extracellular space,extracellular matrix	visual perception,collagen fibril organization,positive regulation of transforming growth factor beta1 production,positive regulation of transcription from RNA polymerase II promoter,axonogenesis	collagen binding	FALSE	100	0.119615	9.2224	5.09833e-17	1.47706e-16	561.683	626.381	615.202	484.897	568.448	557.168	536.837	747.481	709.236	688.92	610.452	642.519	624.264	677.99	630.981	623.152	581.67	600.402	632.344	566.31	615.012	575.768	622.367	725.691	569.494	585.76	656.059	638.084	638.59	600.133	466.89	535.07	601.289	558.605
F1SQR8	F1SQR8	LTA4H	Sus scrofa	Leukotriene A(4) hydrolase	11	12	nucleus,nucleoplasm,cytoplasm,cytosol	proteolysis,leukotriene biosynthetic process,peptide catabolic process,cellular lipid metabolic process,cellular protein metabolic process	epoxide hydrolase activity,leukotriene-A4 hydrolase activity,zinc ion binding,peptide binding,metalloaminopeptidase activity	FALSE	100	0.206253	5.34037	3.22316e-16	7.43524e-16	43.8624	35.9112	34.9316	89.2059	55.799	40.4638	43.3346	33.616	38.5724	40.6144	39.064	54.1185	40.678	48.2873	40.9252	38.5518	40.1287	27.0758	41.9717	34.6954	44.7151	43.8417	48.85	46.0632	44.3179	32.2244	34.5045	30.0291	41.3983	28.3451	54.211	43.3826	38.5818	48.2487
F1SQX9	F1SQX9	APOD	Sus scrofa	Apolipoprotein D	7	13	extracellular space,endoplasmic reticulum,cytosolic ribosome,dendrite,neuronal cell body,perinuclear region of cytoplasm	response to reactive oxygen species,glucose metabolic process,lipid metabolic process,lipid transport,brain development,aging,negative regulation of platelet-derived growth factor receptor signaling pathway,peripheral nervous system axon regeneration,tissue regeneration,negative regulation of protein import into nucleus,response to drug,negative regulation of smooth muscle cell proliferation,resp…	cholesterol binding	FALSE	100	0.16529	8.76416	2.60921e-14	4.27565e-14	410.857	520.704	283.561	259.353	555.226	429.106	456.862	323.56	511.618	443.826	412.861	586.37	526.936	390.522	451.29	352.327	437.772	361.381	457.432	404.678	522.634	354.029	538.458	464.977	364.934	383.08	552.535	361.821	640.457	415.367	480.175	339.287	399.783	410.807
F1SRB9	F1SRB9	ST13	Sus scrofa	ST13 Hsp70 interacting protein	3	3			protein dimerization activity	FALSE	49.1	0.621719	5.15482	2.5689e-08	4.92778e-08	NaN	23.2759	NaN	153.648	34.8894	22.5733	NaN	NaN	30.0281	NaN	27.2061	28.3586	NaN	NaN	24.785	NaN	NaN	NaN	NaN	32.6207	NaN	25.0886	53.3745	NaN	20.0168	30.7796	38.6707	NaN	NaN	20.1965	43.3809	NaN	41.1413	NaN
F1SRC8	F1SRC8	CLEC3B	Sus scrofa	C-type lectin domain family 3 member B	11	22	granular component,extracellular space,cytoplasm,extracellular matrix	positive regulation of plasminogen activation,bone mineralization,cellular response to transforming growth factor beta stimulus	calcium ion binding,heparin binding,kringle domain binding	FALSE	100	0.0993638	9.20272	1.77464e-17	5.98128e-17	655.884	520.918	586.866	532.074	617.056	696.895	594.495	543.277	625.955	639.714	576.844	560.345	514.22	684.15	593.795	595.763	598.447	652.255	620.052	586.87	633.793	605.6	626.943	583.304	547.93	551.776	578.602	750.604	701.404	631.993	647.63	494.806	591.983	737.522
F1SRU2	F1SRU2	ZYX	Sus scrofa	Zyxin	3	3	stress fiber,nucleus,cytosol,cell-cell adherens junction,focal adhesion,phagocytic vesicle	cell-matrix adhesion,transforming growth factor beta receptor signaling pathway,integrin-mediated signaling pathway,stress fiber assembly,cellular response to interferon-gamma	metal ion binding	FALSE	21.4	0.845815	3.22161	4.3053e-08	8.19427e-08	NaN	5.09856	NaN	24.4056	5.01664	NaN	5.51985	NaN	NaN	NaN	16.9172	NaN	NaN	NaN	NaN	NaN	NaN	NaN	NaN	2.35224	NaN	NaN	24.4643	NaN	NaN	NaN	NaN	NaN	NaN	NaN	23.1572	NaN	10.6129	NaN
F1SS24	F1SS24	FN1	Sus scrofa	Fibronectin	114	233	fibrinogen complex,basal lamina,endoplasmic reticulum-Golgi intermediate compartment,apical plasma membrane,extracellular exosome,extracellular matrix	cell-substrate junction assembly,calcium-independent cell-matrix adhesion,positive regulation of gene expression,positive regulation of peptidase activity,peptide cross-linking,integrin activation,substrate adhesion-dependent cell spreading,endodermal cell differentiation,wound healing,positive regulation of axon extension,positive regulation of fibroblast proliferation,interaction with symbiont,…	protease binding,integrin binding,protein C-terminus binding,peptidase activator activity,identical protein binding,chaperone binding,disordered domain specific binding	FALSE	100	0.189471	11.0578	1.77464e-17	5.98128e-17	1998.94	2619.96	1864.12	2658.08	1970.9	2255.6	2179.76	2432.57	2855.61	1928.43	2125.68	2040.25	2367.26	1725.58	2107.88	1886.94	2148.42	2411.52	2011.77	2155.81	2133.92	2136.28	1372.93	2342.55	1740.02	2476	1505.71	2229.81	1399.91	1863.19	2312.79	2256.54	2168.19	1954.36
F1SS26	F1SS26	THBS1	Sus scrofa	Thrombospondin 1	63	102	fibrinogen complex,external side of plasma membrane,platelet alpha granule,extracellular matrix	activation of MAPK activity,negative regulation of cell-matrix adhesion,sprouting angiogenesis,chronic inflammatory response,negative regulation of antigen processing and presentation of peptide or polysaccharide antigen via MHC class II,negative regulation of dendritic cell antigen processing and presentation,immune response,cell cycle arrest,cell adhesion,response to glucose,negative regulation…	phosphatidylserine binding,fibronectin binding,integrin binding,calcium ion binding,heparin binding,fibroblast growth factor binding,low-density lipoprotein particle binding,laminin binding,fibrinogen binding,collagen V binding	FALSE	100	0.325491	9.49146	1.77464e-17	5.98128e-17	962.647	965.109	1058.08	791.767	567.604	472.41	740.043	866.492	1241.38	423.201	727.799	1050.69	864.539	1232.04	788.214	697.784	753.181	1234.97	934.079	733.57	724.005	757.06	865.473	1266.66	1042.2	985.94	210.221	837.659	740.124	569.515	1176.21	1076.52	752.872	606.483
F1SSL6	F1SSL6	PSMA3	Sus scrofa	Proteasome subunit alpha type	7	7	nucleus,cytoplasm,proteasome core complex, alpha-subunit complex	ubiquitin-dependent protein catabolic process,regulation of endopeptidase activity	threonine-type endopeptidase activity	FALSE	100	0.233106	5.56335	8.16273e-15	1.42295e-14	58.2136	61.8324	40.365	111.89	34.6817	60.2125	51.1586	49.1682	53.6035	43.8468	43.2596	30.0196	41.0443	47.7629	51.2643	38.0643	54.1922	39.2965	42.9644	49.8154	59.1834	40.1594	62.7087	55.8675	51.9633	62.662	55.8684	50.4256	49.4235	33.8466	29.5348	60.3671	43.8431	53.6316
F1ST01	F1ST01	SELENBP1	Sus scrofa	Methanethiol oxidase	19	22				FALSE	67.9	0.800432	5.62854	6.35621e-17	1.78754e-16	NaN	42.4626	NaN	371.566	48.1162	57.5771	69.908	38.3173	NaN	31.8507	45.0798	NaN	NaN	NaN	37.0713	NaN	26.0141	NaN	28.5404	41.2725	48.182	48.3481	157.404	46.5768	NaN	33.2478	143.902	NaN	42.7647	37.0964	65.4725	NaN	36.5857	NaN
F1STC2	F1STC2		Sus scrofa	Ig-like domain-containing protein	5	10	extracellular space	immunoglobulin production,immune response		FALSE	100	0.63054	11.3301	1.94359e-16	4.75007e-16	1349.25	1984.34	2000.98	4709.86	1234.24	1649.11	3344.36	2129.78	1120.11	1683.28	3079.08	1822.3	3938.95	2439.34	3380.26	2016.4	2859.03	1669.78	2003.66	2746.72	3104.06	2739.6	5261.1	2176.05	1929.77	2221.05	5199.46	2007.77	2757.29	5338.32	3793.89	1917.95	3189.66	14760
F1STC3	F1STC3		Sus scrofa	Ig-like domain-containing protein	2	3	extracellular space	immunoglobulin production,immune response		FALSE	100	1.09958	9.48913	7.59642e-12	1.2222e-11	786.661	357.957	725.595	1691.92	248.159	987.821	950.929	689.149	347.21	300.709	1152.13	495.387	372.385	495.589	962.376	657.521	1073.37	596.116	272.732	1038.32	968.768	942.565	1229.23	300.573	404.652	484.72	287.134	775.386	1344.11	3260	2503.93	475.193	1007.69	7284.26
F1STC5	F1STC5		Sus scrofa	Ig-like domain-containing protein	16	40	external side of plasma membrane,immunoglobulin complex, circulating,blood microparticle	phagocytosis, recognition,phagocytosis, engulfment,complement activation, classical pathway,defense response to bacterium,innate immune response,B cell receptor signaling pathway,positive regulation of B cell activation	antigen binding,immunoglobulin receptor binding	FALSE	100	0.226529	13.6661	3.25905e-16	7.50883e-16	12741.7	12300.6	10790.8	11967.5	9900.99	12590	12945.4	13737.2	10288.8	8687.32	13552.5	15045.4	14513.5	11195.3	12556.8	11427.8	14025.6	10864.4	11733.4	13883.9	11393.6	13674.5	12563.1	12195.8	11850.2	14721.3	12401.3	12540.5	15468.5	15234.6	13757	11826.9	13124.7	26542.6
F1SUW3	F1SUW3	EFHD2	Sus scrofa	EF-hand domain family member D2	4	4			calcium ion binding,cadherin binding	FALSE	60.7	0.528048	4.28516	1.77464e-17	5.98128e-17	NaN	17.747	NaN	65.2514	22.2561	NaN	26.5648	23.4316	NaN	24.9605	14.6415	23.7823	NaN	13.8248	16.8407	14.9905	NaN	NaN	NaN	NaN	14.6367	NaN	56.1465	5.75816	7.82838	NaN	22.3456	NaN	19.0564	NaN	40.5416	NaN	NaN	NaN
F2Z4Z1	F2Z4Z1	YWHAG	Sus scrofa	14-3-3 domain-containing protein	5	5			protein domain specific binding	FALSE	100	0.391997	5.40477	1.77464e-17	5.98128e-17	32.6327	46.3877	29.7532	170.969	53.669	72.29	55.4546	53.4663	36.6913	36.9307	50.3976	30.214	41.1496	40.8677	49.8764	33.2954	38.7776	23.8602	41.2063	35.3823	43.6873	55.2185	68.4305	35.7189	31.0648	37.1828	65.5296	41.4655	48.6403	44.0899	52.8083	46.9718	45.4199	28.7835
F2Z5B1;P80229	F2Z5B1;P80229	SERPINB1	Sus scrofa	Serpin family B member 1;Leukocyte elastase inhibitor	11	11	;extracellular space,cytoplasm	;negative regulation of endopeptidase activity	;serine-type endopeptidase inhibitor activity	FALSE	98.2	0.448335	4.84767	8.43637e-17	2.28592e-16	25.8892	42.8712	23.9521	88.6856	33.2248	32.0274	29.2406	32.0906	32.8724	33.3812	38.7249	26.5076	25.6235	31.8262	25.6604	17.4567	37.5206	23.1739	21.5639	35.0879	36.7766	28.7491	91.9965	20.9386	32.0699	21.2869	24.8323	25.8988	38.6277	27.7234	82.6192	18.0632	36.878	37.4992
F2Z5J9;Q52NJ1	F2Z5J9;Q52NJ1	RAB11B;RAB11A	Sus scrofa	RAB11B, member RAS onco family;Ras-related protein Rab-11A	6	6	mitochondrion,phagocytic vesicle,recycling endosome,recycling endosome membrane;spindle pole,mitochondrion,multivesicular body,trans-Golgi network,centrosome,kinetochore microtubule,axon,cleavage furrow,macromolecular complex,phagocytic vesicle,perinuclear region of cytoplasm,recycling endosome,recycling endosome membrane,extracellular exosome	receptor recycling,melanosome transport,transferrin transport,insulin secretion involved in cellular response to glucose stimulus,regulation of anion transport,constitutive secretory pathway,regulated exocytosis,transcytosis,cellular response to acidic pH,establishment of protein localization to membrane,retrograde transport, endosome to plasma membrane,regulation of protein localization to cell …	GTPase activity,GTP binding,GDP binding,myosin V binding,cadherin binding;GTPase activity,GTP binding,microtubule binding,myosin V binding	FALSE	90.2	0.597813	5.85363	4.7806e-08	9.08281e-08	40.4259	93.3084	38.5581	205.414	75.5424	41.7624	80.6319	74.3234	39.3489	70.5015	43.3094	73.933	24.4593	52.9561	67.9413	15.7064	76.3927	36.6221	47.2427	55.1751	60.7578	60.5109	260.284	NaN	50.7625	35.0096	71.1349	NaN	82.7446	NaN	231.231	41.9888	79.2725	46.8854
F2Z5K2	F2Z5K2	PSMA5	Sus scrofa	Proteasome subunit alpha type	6	8	nucleus,cytoplasm,proteasome core complex, alpha-subunit complex	proteasome-mediated ubiquitin-dependent protein catabolic process	threonine-type endopeptidase activity	FALSE	100	0.240233	5.63294	1.79027e-14	2.98624e-14	50.2252	65.4432	39.5587	119.639	38.4	72.5813	60.2503	49.5472	42.1999	43.2529	43.7832	34.56	48.5241	48.0025	46.9307	58.4085	48.2038	38.0152	43.292	54.6324	40.3357	40.8422	69.8898	64.2129	52.5839	53.0906	56.4747	39.4379	51.425	44.8046	28.1868	41.1543	51.0068	60.0265
F2Z5L7	F2Z5L7	PSMA1	Sus scrofa	Proteasome subunit alpha type	9	9	nucleus,cytoplasm,proteasome core complex, alpha-subunit complex	ubiquitin-dependent protein catabolic process	threonine-type endopeptidase activity	FALSE	100	0.241954	6.237	7.9567e-16	1.6708e-15	91.0492	98.4645	69.7679	193.58	57.1025	87.9163	94.2591	82.3283	74.4997	73.5259	72.5551	53.321	76.6073	77.3304	71.4798	60.4632	79.2914	72.3445	53.7591	67.7226	62.6888	79.8383	96.8425	110.032	73.8146	90.7743	92.7021	58.579	65.1222	54.2674	53.4673	90.7194	80.7788	69.8268
F2Z5N0	F2Z5N0	PSMA6	Sus scrofa	Proteasome subunit alpha type	7	8	cytoplasmic mRNA processing body,nucleoplasm,polysome,nuclear matrix,proteasome core complex, alpha-subunit complex	ubiquitin-dependent protein catabolic process,positive regulation of NF-kappaB transcription factor activity	RNA binding,threonine-type endopeptidase activity,NF-kappaB binding	FALSE	100	0.233007	5.43244	2.53197e-14	4.15463e-14	52.1135	51.1467	36.555	96.55	36.1518	53.4426	42.6143	50.7706	36.4281	52.3557	44.1135	28.9024	32.4436	43.6806	39.0803	32.2253	49.2137	40.3457	35.0525	42.3939	48.2707	54.6026	50.7141	53.1458	42.6562	59.7434	54.0656	34.55	35.5969	37.7846	34.75	51.6892	29.2106	52.9874
F2Z5P7	F2Z5P7	ABHD17B	Sus scrofa	Abhydrolase domain containing 17B, depalmitoylase	1	1	plasma membrane,postsynaptic density,recycling endosome membrane	protein depalmitoylation,protein palmitoylation,regulation of protein localization to synapse,negative regulation of protein localization to microtubule,regulation of dendritic spine maintenance,Requires Ontology	palmitoyl-(protein) hydrolase activity	FALSE	75	0.231916	8.41167	3.58645e-05	5.9088e-05	403.044	176.741	NaN	362.574	527.19	396.171	379.41	351.276	NaN	321.435	437.224	272.36	382.799	279.866	300.242	223.194	389.321	NaN	451.245	315.251	NaN	438.404	NaN	241.806	339.325	312.882	NaN	339.535	341.299	334.995	521.914	354.177	234.304	349.017
F2Z5R6	F2Z5R6	CAND1	Sus scrofa	Cullin associated and neddylation dissociated 1	11	11	nucleoplasm,Golgi apparatus,cytosol,cullin-RING ubiquitin ligase complex	SCF complex assembly,protein ubiquitination,cell differentiation,negative regulation of catalytic activity		FALSE	25.9	0.681972	4.07424	1.28659e-07	2.39899e-07	NaN	32.4696	NaN	78.1058	7.01016	NaN	19.7901	8.10899	NaN	NaN	NaN	NaN	NaN	NaN	NaN	31.4753	17.3893	NaN	NaN	NaN	NaN	NaN	17.2672	NaN	NaN	NaN	9.80009	NaN	27.7331	NaN	NaN	NaN	NaN	NaN
F6PSJ3	F6PSJ3	APOC2	Sus scrofa	Apolipoprotein C-II	3	4				TRUE	100	0.259158	5.98572	1.77464e-17	5.98128e-17	46.2498	55.2904	41.7373	77.3943	68.1551	87.6591	81.1454	83.1742	51.6157	64.0979	81.0519	54.5426	70.7692	56.8323	75.5037	59.4781	59.4392	44.4821	59.7124	61.9293	70.9058	69.8551	94.7143	39.7109	63.1856	67.5473	75.2898	76.3328	70.8961	66.1826	36.5301	65.9217	61.0874	46.6121
G9F6X8	G9F6X8	P4HB	Sus scrofa	Protein disulfide-isomerase	3	3	endoplasmic reticulum-Golgi intermediate compartment,external side of plasma membrane,procollagen-proline 4-dioxygenase complex,endoplasmic reticulum chaperone complex	peptidyl-proline hydroxylation to 4-hydroxy-L-proline,response to endoplasmic reticulum stress,cell redox homeostasis,positive regulation of viral entry into host cell,oxidation-reduction process,cellular response to hypoxia,regulation of oxidative stress-induced intrinsic apoptotic signaling pathway	protein disulfide isomerase activity,procollagen-proline 4-dioxygenase activity,integrin binding,peptide disulfide oxidoreductase activity,protein heterodimerization activity	FALSE	92	0.220841	5.84719	1.1777e-10	2.09717e-10	43.6926	61.018	57.7783	82.4074	64.6744	NaN	54.686	59.3895	61.1397	80.3415	71.5947	67.3573	NaN	55.4746	68.4213	49.3738	NaN	44.7609	68.3549	67.9478	47.3727	47.8229	82.4026	82.2678	86.0049	73.9041	70.3476	59.7365	49.1185	45.3893	47.8097	42.2776	50.0835	46.2529
H6UWK6	H6UWK6	OLFML3	Sus scrofa	Olfactomedin like 3	3	3				FALSE	75	0.401681	4.90052	7.18358e-12	1.15379e-11	30.1225	33.2773	21.9224	15.0158	32.5946	29.3825	21.0237	29.8312	30.7715	NaN	27.4891	NaN	28.2856	35.0198	21.8775	NaN	32.4642	48.8652	NaN	27.552	26.1711	NaN	40.2896	42.1954	34.226	29.4622	39.1621	71.3148	30.0363	18.6102	NaN	NaN	25.5155	35.4193
I3L5Z1	I3L5Z1	CDH1	Sus scrofa	Cadherin 1	12	13				FALSE	100	0.121342	8.85432	9.49194e-15	1.63949e-14	559.32	469.572	487.928	454.139	560.09	526.661	441.786	443.522	375.57	443.548	451.492	335.96	502.272	501.404	436.498	457.673	466.778	503.144	478.762	450.215	507.716	415.954	393.432	398.735	593.266	457.514	356.296	524.013	466.717	530.962	435.586	527.97	457.876	570.946
I3L5Z3	I3L5Z3	PRG4	Sus scrofa	Proteoglycan 4	1	1		receptor-mediated endocytosis,immune response	scavenger receptor activity,polysaccharide binding	TRUE	84.8	0.394553	5.48673	6.80664e-13	1.04679e-12	71.0814	NaN	NaN	50.9244	52.9644	41.3554	NaN	43.8632	74.1149	40.8149	47.5783	52.4833	NaN	NaN	28.5695	82.6425	35.0637	122.933	49.3478	53.144	61.3631	37.9786	26.1923	NaN	25.1627	104.492	48.8599	57.659	NaN	26.2748	28.2422	32.674	29.0013	NaN
I3L629	I3L629	LOC100519130	Sus scrofa	Peptidase M20 dimerisation domain-containing protein	8	9		metabolic process	hydrolase activity	FALSE	59.8	0.619728	4.99422	3.48639e-12	5.49016e-12	34.9607	27.7218	NaN	106.483	NaN	NaN	26.1786	NaN	26.7939	NaN	26.6214	39.4098	NaN	NaN	25.4616	NaN	35.8409	43.9046	15.2778	27.7491	38.9703	27.6269	28.0294	28.3277	18.2876	19.2724	67.9411	NaN	25.1391	NaN	NaN	28.1531	23.8765	30.546
I3L651	I3L651	FGB	Sus scrofa	Fibrinogen beta chain	33	87				FALSE	100	3.96063	7.39935	2.29604e-16	5.50346e-16	90.0571	98.3112	131.841	196.457	112.773	158.308	347.078	122.573	125.291	126.412	335.999	83.7297	115.156	102.59	331.548	170.654	319.007	82.518	94.9605	324.284	362.796	325.219	158.694	95.2225	89.7213	119.644	262.136	113.668	111.466	103.123	113.769	112.068	330.14	118.45
I3L672	I3L672	PCGF6	Sus scrofa	Polycomb group RING finger protein 6 isoform a	1	1	PRC1 complex	negative regulation of transcription from RNA polymerase II promoter,histone H2A-K119 monoubiquitination	RNA polymerase II regulatory region sequence-specific DNA binding,transcriptional repressor activity, RNA polymerase II transcription regulatory region sequence-specific binding	FALSE	38.4	0.55778	2.65643	6.21746e-05	0.000100624	11.1965	NaN	3.72383	NaN	2.19147	NaN	19.4688	NaN	4.20587	8.33508	NaN	NaN	NaN	NaN	9.87213	12.8219	NaN	NaN	NaN	9.2133	NaN	NaN	NaN	NaN	NaN	NaN	5.16434	10.9007	NaN	12.4778	NaN	2.6022	11.6192	NaN
I3L6T2;I3LFW6	I3L6T2;I3LFW6	UBE2V2;UBE2V1	Sus scrofa	Ubiquitin conjugating enzyme E2 V2;Ubiquitin conjugating enzyme E2 V1	1	1	nucleus,nucleoplasm,cytoplasm,UBC13-MMS2 complex;	DNA double-strand break processing,postreplication repair,error-free postreplication DNA repair,protein K63-linked ubiquitination;	ubiquitin protein ligase binding,ubiquitin protein ligase activity,ubiquitin conjugating enzyme activity;	FALSE	8.9	0.663542	3.84018	2.1986e-05	3.67413e-05	NaN	NaN	NaN	41.6505	NaN	NaN	NaN	NaN	NaN	NaN	NaN	NaN	15.6548	NaN	NaN	NaN	NaN	NaN	NaN	8.65529	NaN	12.398	13.9223	NaN	NaN	NaN	8.55626	NaN	NaN	NaN	NaN	NaN	NaN	NaN
I3L6U3	I3L6U3		Sus scrofa	Uncharacterized protein	6	12	extracellular space	immunoglobulin production,immune response		FALSE	100	0.317067	11.6326	1.34046e-14	2.27003e-14	2825.2	3012.83	3689.86	3581.82	2550.78	3178.6	3425.51	5169.22	1877.56	3556.94	3431.46	3228.1	866.632	3662.57	3374.43	3513.34	3180.65	3427.56	3508.32	3109.67	3204.75	3262.33	2925.34	2911.11	2831.23	3314.44	3264.69	3785.21	3793.62	3515.59	3970.42	3085.72	3468.03	8277.33
I3L7P7	I3L7P7	ATOX1	Sus scrofa	Copper transport protein ATOX1	5	7	cytoplasm	cellular copper ion homeostasis,response to oxidative stress,intracellular copper ion transport	copper chaperone activity	FALSE	74.1	1.10192	4.88755	4.1737e-12	6.60186e-12	11.714	37.5807	11.7418	351.952	27.7262	30.5173	18.9005	32.7061	11.7032	25.399	35.6409	20.0149	NaN	22.1323	26.9931	NaN	31.0196	10.143	NaN	28.2067	54.0297	30.3765	92.2895	NaN	19.6202	20.3169	75.4717	NaN	22.2237	20.6602	39.0343	17.8999	33.4639	NaN
I3L9F5	I3L9F5	PCYOX1	Sus scrofa	Prenylcysteine oxidase 1	3	3	lysosome,vacuolar membrane,very-low-density lipoprotein particle	prenylated protein catabolic process,prenylcysteine catabolic process,oxidation-reduction process	prenylcysteine oxidase activity	FALSE	99.1	0.29923	4.46974	2.70209e-13	4.16388e-13	20.8102	28.4756	20.8773	24.148	21.1236	24.9729	22.2388	20.9255	16.9366	18.7665	33.6319	39.6333	28.1918	34.6208	31.71	12.0635	21.6665	21.1121	23.9448	25.5131	32.917	11.5562	27.7314	26.9253	23.767	20.3667	22.3482	18.6094	23.3819	20.5617	11.3039	28.4936	22.349	21.4771
I3L9F8	I3L9F8	VTN	Sus scrofa	Vitronectin	18	40				FALSE	100	0.107787	11.4307	1.77464e-17	5.98128e-17	2343.02	3113.08	2664.16	2442.03	2791.14	2495.04	2742.73	2930.51	2512.19	2476.75	2818.7	2714.21	2608.79	3063.76	2639.46	2909.11	2674.32	3092.14	3176.83	2732.95	2599.32	2563.73	3525.28	3191.19	2926.87	2909.23	3011.32	3141.53	2947.41	2900.08	3080.33	2841.49	2643.2	3178.58
I3L9H4	I3L9H4	PITHD1	Sus scrofa	PITH domain containing 1	1	1	nucleus	cellular response to DNA damage stimulus		FALSE	25	1.26586	3.54726	2.74873e-08	5.26785e-08	NaN	NaN	NaN	115.539	NaN	4.12222	5.8077	NaN	NaN	NaN	10.3974	NaN	NaN	NaN	13.8519	NaN	NaN	NaN	NaN	6.34931	NaN	NaN	56.9549	NaN	NaN	NaN	11.3037	NaN	8.22906	NaN	NaN	NaN	13.3699	NaN
I3LAB6	I3LAB6	PSMA2	Sus scrofa	Proteasome subunit alpha type	7	7	nucleus,cytoplasm,proteasome core complex, alpha-subunit complex	ubiquitin-dependent protein catabolic process	threonine-type endopeptidase activity	FALSE	100	0.257825	5.32992	1.67885e-15	3.29162e-15	48.092	57.0858	31.4631	113.285	29.7486	40.1484	40.7129	44.6289	47.2261	44.877	47.2702	30.7807	39.0928	38.8813	43.2402	38.5766	38.7042	33.2889	36.8951	33.2663	37.9153	38.6829	54.6445	54.9108	40.4471	58.1745	50.8256	33.1772	43.1922	29.1247	26.9467	45.9871	44.214	50.8676
I3LB28	I3LB28	NRP2	Sus scrofa	Neuropilin	4	4	integral component of membrane	angiogenesis,axon guidance,vascular endothelial growth factor signaling pathway,semaphorin-plexin signaling pathway	vascular endothelial growth factor-activated receptor activity,semaphorin receptor activity,metal ion binding	FALSE	99.1	0.253635	4.74693	5.7469e-11	9.95371e-11	31.4157	36.1162	33.7087	36.0325	17.5633	22.298	21.3091	17.1619	27.8418	34.2286	30.004	27.9092	33.9411	35.6812	18.601	29.3273	34.3294	47.2305	23.1942	34.4401	20.9031	27.1393	29.2231	34.555	25.546	28.0808	30.1324	21.5546	30.9311	24.3331	NaN	30.4466	13.5883	32.4879
I3LC14	I3LC14	ADAMTSL2	Sus scrofa	ADAMTS like 2	1	1	proteinaceous extracellular matrix	proteolysis,extracellular matrix organization,negative regulation of transforming growth factor beta receptor signaling pathway,lobar bronchus epithelium development	peptidase activity,microfibril binding	FALSE	75	0.470195	4.31989	7.48753e-09	1.45109e-08	14.3672	18.2846	13.586	34.284	NaN	15.6283	23.8611	8.46575	NaN	19.6389	27.1394	NaN	NaN	20.5401	37.3687	16.3628	28.2776	18.8156	21.0215	15.1444	31.4984	16.9276	37.1932	23.3936	NaN	18.3142	NaN	13.1431	42.5813	89.0257	18.334	14.224	23.4997	NaN
I3LC64	I3LC64	ECM1	Sus scrofa	Extracellular matrix protein 1	22	32	extracellular space,extracellular matrix	positive regulation of endothelial cell proliferation,negative regulation of cytokine-mediated signaling pathway,regulation of type 2 immune response,regulation of transcription from RNA polymerase II promoter,inflammatory response,signal transduction,negative regulation of peptidase activity,negative regulation of bone mineralization,positive regulation of angiogenesis,regulation of T cell migra…	protease binding,interleukin-2 receptor binding,protein C-terminus binding,laminin binding	FALSE	100	0.119741	7.96774	4.92956e-17	1.43474e-16	253.075	249.876	266.255	225.243	241.396	228.859	229.216	280.288	297.309	228.6	251.127	270.28	290.195	283.213	234.462	234.003	246.44	268.211	253.84	245.67	244.119	237.897	188.469	314.412	279.633	269.557	179.428	343.512	244.663	259.703	296.772	272.693	239.549	292.842
I3LCU9	I3LCU9	CARHSP1	Sus scrofa	Calcium regulated heat stable protein 1	3	4	cytoplasm	regulation of transcription, DNA-templated,regulation of mRNA stability	DNA binding,mRNA 3'-UTR binding	FALSE	16.1	1.22005	3.57489	1.10918e-07	2.07436e-07	NaN	NaN	NaN	98.1218	NaN	NaN	NaN	NaN	NaN	NaN	NaN	NaN	NaN	NaN	NaN	NaN	NaN	NaN	NaN	7.0813	NaN	NaN	17.8916	NaN	NaN	NaN	17.3245	NaN	NaN	NaN	NaN	NaN	2.69389	NaN
I3LE57	I3LE57	ARHGAP28	Sus scrofa	Rho GTPase activating protein 28	1	1		signal transduction,negative regulation of stress fiber assembly,negative regulation of GTP binding		FALSE	100	0.216592	8.57625	8.86948e-12	1.43401e-11	455.336	187.454	421.653	432.684	557.786	329.979	465.058	340.734	389.681	381.193	385.922	324.634	289.2	527.199	360.179	295.252	387.322	411.471	518.309	387.594	475.564	388.145	336.51	174.784	272.897	474.903	135.221	378.992	406.102	387.684	523.631	428.008	370.909	483.33
I3LEE6	I3LEE6	PCOLCE	Sus scrofa	Procollagen C-endopeptidase enhancer	15	15	extracellular space,extracellular matrix	proteolysis,positive regulation of peptidase activity,cellular response to leukemia inhibitory factor	collagen binding,heparin binding,peptidase activator activity	FALSE	100	0.13424	6.75626	1.77464e-17	5.98128e-17	98.0862	135.996	113.008	113.541	99.2647	113.026	115.219	89.8905	110.4	97.6604	112.631	101.207	108.482	124.002	102.406	115.51	104.181	97.8004	92.7649	115.894	106.483	99.3929	109.561	114.88	106.41	122.038	103.373	133.457	135.896	96.5042	70.1161	108.089	97.802	108.704
I3LEW0	I3LEW0	COLEC11	Sus scrofa	Collectin subfamily member 11	4	4				TRUE	100	0.197578	5.21048	1.00297e-11	1.6281e-11	31.6818	48.0862	32.4188	50.8627	30.7921	23.6598	25.4115	51.3238	42.4506	37.6149	35.261	35.7179	41.0329	39.1111	38.9403	38.5368	31.9697	37.9739	46.4835	25.1881	35.4142	30.6732	42.6851	45.5318	42.4787	33.6482	31.6111	36.9333	39.5336	32.6441	34.6543	40.1556	35.3324	44.4011
I3LF89	I3LF89	CPN2	Sus scrofa	Carboxypeptidase N subunit 2	18	27				FALSE	100	0.0772164	9.27893	1.19194e-15	2.40919e-15	658.638	473.588	669.592	614.915	686.255	590.156	605.063	556.98	553.851	713.596	615.992	543.468	616.202	629.181	600.271	581.675	643.864	685.639	598.705	634.635	622.27	613.734	651.474	500.18	573.579	579.252	696.497	555.18	647.053	638.904	682.783	618.525	614.954	616.605
I3LGB2	I3LGB2	PCSK9	Sus scrofa	Proprotein convertase subtilisin/kexin type 9	10	11				FALSE	100	0.181154	5.54306	1.28711e-16	3.30606e-16	35.534	42.9399	50.3095	51.7554	37.2105	48.8108	44.8225	49.0567	55.881	47.9015	49.0444	43.1362	42.7115	34.9743	42.3468	63.2164	42.4611	45.9642	29.193	43.3656	50.2771	45.7509	51.7847	40.7169	54.1532	37.2932	45.8934	41.6284	34.0384	44.0667	50.3736	39.8996	46.1665	59.371
I3LK29	I3LK29	LCAT	Sus scrofa	Lecithin-cholesterol acyltransferase	10	13	integral component of membrane,high-density lipoprotein particle	phosphatidylcholine biosynthetic process,cholesterol metabolic process,very-low-density lipoprotein particle remodeling,high-density lipoprotein particle remodeling,cholesterol esterification,lipoprotein biosynthetic process,cholesterol homeostasis,reverse cholesterol transport,regulation of high-density lipoprotein particle assembly	phosphatidylcholine-sterol O-acyltransferase activity,apolipoprotein A-I binding	FALSE	100	0.105402	7.22109	1.77464e-17	5.98128e-17	132.878	162.738	121.677	162.02	133.576	127.229	160.843	169.285	156.577	142.939	142.668	160.666	133.324	159.514	134.264	147.384	130.086	153.562	165.333	154.982	156.4	145.097	172.461	130.208	130.318	142.631	199.654	137.508	150.2	123.628	118.035	122.409	148.117	139.486
I3LKI1	I3LKI1	SRGN	Sus scrofa	Serglycin	3	5	extracellular space,Golgi apparatus	granzyme-mediated apoptotic signaling pathway,negative regulation of bone mineralization,protease localization to mast cell secretory granule		FALSE	100	0.322147	7.37708	2.15041e-12	3.35167e-12	133.813	192.666	183.38	159.358	193.11	113.707	187.273	215.926	305.006	214.925	186.196	170.204	267.638	230.607	162.783	164.238	163.275	207.975	130.307	176.212	162.866	183.109	131.7	226.609	193.136	186.235	79.8067	182.342	99.312	175.292	253.508	247.7	175.335	194.138
I3LKV5	I3LKV5	ADAMTS13	Sus scrofa	ADAM metallopeptidase with thrombospondin type 1 motif 13	14	14		proteolysis,peptide catabolic process		FALSE	100	0.184682	5.73612	5.7569e-15	1.02656e-14	51.5809	50.424	50.6811	45.3096	46.0304	61.9868	48.7955	48.7322	73.6156	51.5185	50.8196	37.9008	71.2044	45.3845	50.7249	53.051	43.9404	51.8722	53.8545	56.6993	44.7628	53.7517	60.6592	55.7008	55.5175	64.7674	40.9675	58.7122	77.4338	42.33	33.1266	60.8803	54.6794	60.7475
I3LKY5	I3LKY5	NMI	Sus scrofa	N-myc and STAT interactor	1	1	nucleoplasm,cytosol	transcription from RNA polymerase II promoter,negative regulation of interferon-alpha biosynthetic process,negative regulation of interferon-beta biosynthetic process,negative regulation of innate immune response,interferon-gamma-mediated signaling pathway,positive regulation of protein K48-linked ubiquitination,regulation of nucleic acid-templated transcription	nucleic acid binding,transcription cofactor activity,identical protein binding	FALSE	97.3	0.169632	8.16371	9.63012e-14	1.50927e-13	312.153	311.491	260.387	291.992	NaN	289.815	307.669	290.729	413.103	320.512	315.619	290.254	258.189	252.776	253.661	284.226	217.643	291.722	409.209	256.109	260.328	307.174	260.235	377.856	258.964	255.958	315.112	303.622	271.193	224.347	233.642	252.03	279.68	274.216
I3LL32	I3LL32	CHIA	Sus scrofa	chitinase	1	1	extracellular region,extracellular space,cytoplasm	production of molecular mediator involved in inflammatory response,carbohydrate metabolic process,chitin catabolic process,positive regulation of chemokine secretion	chitinase activity,chitin binding,kinase binding	FALSE	65.2	0.588519	3.44497	8.33833e-09	1.61547e-08	NaN	NaN	14.7106	NaN	8.63143	25.3258	NaN	8.55549	14.9857	2.27127	8.42545	5.92233	7.57304	NaN	NaN	NaN	5.78837	14.4285	5.7764	13.0093	21.2437	9.63001	NaN	18.2666	NaN	15.3217	16.3684	NaN	15.7546	22.3152	40.637	NaN	NaN	20.4164
I3LMQ4	I3LMQ4	LOC100621260	Sus scrofa	START domain-containing protein	2	2	cytosol	phospholipid transport	phosphatidylcholine transporter activity,phosphatidylcholine binding	FALSE	15.2	1.07484	4.51214	0.00118671	0.00167354	NaN	NaN	NaN	159.061	NaN	8.62999	NaN	NaN	NaN	NaN	15.8467	NaN	NaN	NaN	NaN	NaN	16.6117	NaN	NaN	NaN	NaN	NaN	45.4861	NaN	NaN	NaN	66.7159	NaN	8.87297	NaN	NaN	NaN	NaN	NaN
I3LMU0	I3LMU0	SERPINA11	Sus scrofa	Serpin family A member 11	1	1				FALSE	39.3	0.387399	4.56686	2.07166e-13	3.20147e-13	NaN	40.1086	27.1198	34.2261	33.1784	NaN	NaN	13.5631	35.6749	40.2572	40.973	7.50216	NaN	NaN	NaN	31.645	NaN	NaN	NaN	31.4474	NaN	NaN	23.6327	21.3594	28.5173	37.6156	10.8743	NaN	NaN	NaN	19.174	10.7069	30.8565	NaN
I3LMU6	I3LMU6	RCN3	Sus scrofa	Reticulocalbin 3	9	9			calcium ion binding	FALSE	100	0.168536	5.73478	7.0232e-13	1.08025e-12	68.5745	63.5897	53.5971	58.5816	42.7399	64.1604	48.8073	52.911	49.9465	60.3513	51.2917	43.3722	63.6481	57.5619	54.3439	47.5193	52.4181	52.5073	67.6329	52.1978	43.2885	50.3217	56.2122	74.7185	64.0327	54.1865	64.4713	74.8297	50.5353	65.3276	35.3692	48.3654	55.0601	61.597
I3LNG8	I3LNG8	STIP1	Sus scrofa	Stress induced phosphoprotein 1	7	7				FALSE	20.5	0.642804	5.73975	2.56202e-11	4.30065e-11	NaN	NaN	NaN	180.023	NaN	NaN	NaN	NaN	NaN	NaN	52.0317	NaN	NaN	NaN	NaN	NaN	NaN	NaN	NaN	NaN	NaN	NaN	98.9578	NaN	NaN	NaN	55.2131	NaN	NaN	NaN	38.163	NaN	27.1919	NaN
I3LPB5;Q29594	I3LPB5;Q29594	CKB	Sus scrofa	creatine kinase;Creatine kinase B-type	6	8	mitochondrion,cytosol,myelin sheath;cytoplasm	phosphorylation;phosphorylation	ATP binding,kinase activity,ubiquitin protein ligase binding;creatine kinase activity,ATP binding	FALSE	83.9	0.387782	4.28892	1.94104e-11	3.22464e-11	23.0615	NaN	NaN	NaN	24.7793	48.9135	19.867	34.8453	16.4189	21.8215	17.7672	26.1038	22.9495	15.7249	20.173	25.962	20.8095	14.5253	NaN	22.631	28.6217	26.5194	8.61968	22.8586	18.3954	19.4805	24.8758	NaN	34.3084	18.7185	12.7995	17.1538	25.2001	NaN
I3LQH7	I3LQH7	BLVRB	Sus scrofa	Biliverdin reductase B	12	26	nucleoplasm,cytosol,plasma membrane	heme catabolic process,oxidation-reduction process	biliverdin reductase activity,riboflavin reductase (NADPH) activity	FALSE	96.4	2.29314	6.35479	1.77464e-17	5.98128e-17	18.7257	136.363	23.1421	3849.89	127.231	197.999	161.622	149.593	20.2953	77.0256	170.857	17.4458	9.21315	24.7289	168.553	95.2223	189.714	36.4587	43.4338	175.48	169.906	170.921	690.722	24.6857	19.0839	65.509	641.632	45.3281	156.846	56.2013	212.899	13.3655	167.77	46.8149
I3LQQ6;P79335	I3LQQ6;P79335	SERPINE1	Sus scrofa	Serpin family E member 1;Plasminogen activator inhibitor 1	7	9	extracellular matrix,extracellular exosome;extracellular space	chronological cell aging,angiogenesis,regulation of receptor activity,negative regulation of plasminogen activation,negative regulation of endopeptidase activity,negative regulation of smooth muscle cell migration,positive regulation of interleukin-8 production,negative regulation of cell adhesion mediated by integrin,positive regulation of leukotriene production involved in inflammatory response…	protease binding,serine-type endopeptidase inhibitor activity,receptor binding;serine-type endopeptidase inhibitor activity	FALSE	99.1	0.281951	5.42664	1.28429e-15	2.57832e-15	41.0147	51.2675	44.8027	27.1164	32.625	34.9864	39.9268	63.3159	65.8229	66.4553	46.1406	69.5306	60.2212	58.2511	58.5094	37.0815	46.957	60.1942	59.9812	38.0452	45.5466	48.694	35.3732	70.8625	64.5578	41.0273	NaN	39.5736	32.9169	43.2455	84.9945	46.9185	40.3695	59.6832
I3LS72	I3LS72	COL6A1	Sus scrofa	Collagen type VI alpha 1 chain	6	6				FALSE	97.3	0.269993	4.52063	1.55332e-10	2.79471e-10	29.766	24.673	20.989	18.2557	19.1917	20.8069	25.704	25.9575	21.1468	18.7601	13.9812	35.104	24.3807	25.392	17.7071	27.7459	29.7165	13.687	32.4317	31.0991	24.9721	26.6177	20.7907	34.6683	26.4649	31.0119	27.9693	39.7208	17.4783	20.2666	19.4716	12.823	26.5708	36.8731
I3LS87	I3LS87	VASN	Sus scrofa	Vasorin	6	9	plasma membrane,integral component of membrane	cell surface receptor signaling pathway		FALSE	100	0.139729	5.70616	2.04003e-16	4.95749e-16	57.9467	58.6761	43.1669	53.1727	43.3562	53.2264	52.8707	63.3092	52.3875	54.7072	55.6285	42.4947	49.8203	60.3442	56.1945	45.0053	51.2912	57.0764	52.0538	54.6929	51.0414	42.7594	58.7901	71.4518	56.6472	54.4311	41.7295	63.7259	49.0032	56.1888	37.969	54.5111	47.6164	60.3019
I3LSA5	I3LSA5		Sus scrofa	Alpha-amylase	1	1		carbohydrate metabolic process	alpha-amylase activity,cation binding,Requires Ontology	FALSE	45.5	0.434586	4.26514	7.1438e-09	1.38461e-08	20.5001	NaN	NaN	21.3788	NaN	7.3465	NaN	NaN	NaN	44.9133	NaN	NaN	NaN	19.3431	11.2354	NaN	NaN	6.66614	26	25.6319	NaN	5.49411	25.6943	NaN	NaN	NaN	NaN	NaN	10.2904	NaN	NaN	NaN	14.3136	NaN
I3LUD1	I3LUD1	SOD3	Sus scrofa	Superoxide dismutase [Cu-Zn]	7	10	extracellular space,cytoplasm	removal of superoxide radicals,oxidation-reduction process	superoxide dismutase activity,copper ion binding,zinc ion binding	FALSE	100	0.207814	5.14487	1.77464e-17	5.98128e-17	37.0207	35.3488	51.6816	27.6132	29.5568	41.1414	38.4381	25.4353	52.9006	22.0748	36.8274	33.7549	29.4672	32.2267	37.156	48.0534	38.4759	32.2966	43.0464	33.9172	37.3006	40.323	38.8877	42.0794	39.5255	44.0761	32.1376	41.465	34.4663	50.0662	35.6811	34.5458	32.9448	46.4864
I3LUI4;Q29116	I3LUI4;Q29116	TNC	Sus scrofa	Tenascin C;Tenascin	2	2	;proteinaceous extracellular matrix,extracellular matrix	;cell adhesion	;	FALSE	70.5	0.334579	4.17612	3.75826e-10	6.96784e-10	7.49149	9.46401	43.6573	NaN	12.917	22.2267	14.6193	21.9279	19.858	NaN	21.2141	27.4844	23.842	25.1428	25.5292	13.2322	13.5695	NaN	NaN	26.627	NaN	18.9466	NaN	19.9078	NaN	21.5268	NaN	19.2341	10.1824	11.9369	25.9456	9.56249	25.2728	NaN
I3LUJ5;Q08094	I3LUJ5;Q08094	CNN2	Sus scrofa	Calponin;Calponin-2 (Fragment)	3	4	cytoskeleton;cytoskeleton	actomyosin structure organization;actomyosin structure organization	actin binding,calmodulin binding;actin binding,calmodulin binding	FALSE	76.8	0.549003	4.43616	6.13951e-07	1.10868e-06	21.2962	30.9798	10.744	61.9968	23.4498	14.0108	21.6122	14.3377	21.1551	24.895	19.3813	17.5578	NaN	NaN	13.5696	NaN	17.7733	29.7632	20.6525	18.7085	27.1037	NaN	81.477	8.95163	17.9896	20.3542	20.5592	17.6381	27.0265	15.8602	66.0551	NaN	21.3271	57.8711
I3LVD5	I3LVD5	ACTG1	Sus scrofa	Actin gamma 1	20	32				FALSE	100	0.305405	7.94199	1.77464e-17	5.98128e-17	229.933	232.921	217.308	563.999	345.187	367.807	262.024	282.434	220.549	259.633	261.641	183.402	172.101	241.162	244.07	264.954	256.183	196.629	246.888	268.767	263.679	270.594	457.19	241.974	189.037	210.3	279.172	209.391	266.73	258.006	321.724	187.542	263.678	264.006
I3LVL5	I3LVL5	CRISP3	Sus scrofa	Cysteine rich secretory protein 3	11	20	extracellular region			FALSE	100	0.133649	7.13404	1.77464e-17	5.98128e-17	171.43	146.593	144.819	129.067	147.928	160.876	138.43	119.912	137.311	120.019	138.264	171.216	159.339	142.496	137.746	139.797	142.793	121.901	144.206	129.195	151.293	141.004	142.811	156.299	127.787	110.492	168.312	136.831	201.406	126.667	144.155	108.475	130.659	123.499
I3LVS7	I3LVS7	RHOA	Sus scrofa	Ras homolog family member A	3	3	nucleus,cytoplasm,mitochondrion,endosome,cytosol,plasma membrane,focal adhesion,cell cortex,membrane,lamellipodium,axon,vesicle,cleavage furrow,ruffle membrane,apical junction complex,extracellular exosome,cell periphery,meiotic spindle	meiotic spindle organization,cell morphogenesis,alpha-beta T cell lineage commitment,regulation of transcription from RNA polymerase II promoter,cytoskeleton organization,cell adhesion,cell-matrix adhesion,Rho protein signal transduction,skeletal muscle tissue development,regulation of neuron projection development,cerebral cortex cell migration,forebrain radial glial cell differentiation,actin c…	GTPase activity,GTP binding,myosin binding,GDP binding,protein domain specific binding,Rho GDP-dissociation inhibitor binding	FALSE	24.1	0.960164	3.52675	0.000154329	0.000241378	NaN	NaN	NaN	79.1584	8.14355	12.1705	NaN	NaN	NaN	NaN	NaN	NaN	NaN	NaN	NaN	NaN	NaN	NaN	NaN	8.12898	NaN	NaN	26.6128	NaN	NaN	NaN	NaN	NaN	NaN	NaN	NaN	NaN	10.2276	NaN
J9JIK8;P80895	J9JIK8;P80895	PCMT1	Sus scrofa	Protein-L-isoaspartate O-methyltransferase;Protein-L-isoaspartate(D-aspartate) O-methyltransferase	5	5	cytosol;cytoplasm	protein methylation;protein methylation	protein-L-isoaspartate (D-aspartate) O-methyltransferase activity;protein-L-isoaspartate (D-aspartate) O-methyltransferase activity	FALSE	57.1	1.00458	4.27215	2.63758e-09	5.09274e-09	NaN	16.8099	NaN	183.432	NaN	22.0808	19.195	19.1154	NaN	NaN	NaN	NaN	NaN	7.7896	24.6746	NaN	22.3015	5.91903	NaN	18.1478	17.4586	NaN	32.5648	NaN	NaN	NaN	37.7881	6.82243	12.7362	NaN	23.2559	NaN	33.6493	NaN
K7GKU8	K7GKU8	MASP2	Sus scrofa	MBL associated serine protease 2	5	5		complement activation, lectin pathway,proteolysis	complement component C4b binding,serine-type endopeptidase activity,calcium ion binding,calcium-dependent protein binding	FALSE	99.1	0.234709	5.90956	8.45351e-15	1.47045e-14	44.2214	54.3985	47.7475	100.589	67.6833	46.6594	59.318	72.5451	57.615	49.5761	68.3045	63.5567	68.0054	81.7935	66.1091	64.4876	60.6937	61.7761	55.6369	45.6527	88.5241	71.8407	47.9706	57.8213	91.1471	70.7924	61.52	60.9679	53.0105	89.4219	76.898	68.9449	59.3773	74.7125
K7GKY0	K7GKY0	CD109	Sus scrofa	CD109 antigen isoform 1 preproprotein	21	26	extracellular space,integral component of membrane	negative regulation of protein phosphorylation,hair follicle development,negative regulation of keratinocyte proliferation,negative regulation of endopeptidase activity,negative regulation of transforming growth factor beta receptor signaling pathway,regulation of keratinocyte differentiation,negative regulation of wound healing,osteoclast fusion	endopeptidase inhibitor activity,transforming growth factor beta binding	FALSE	100	0.117603	6.40332	1.77464e-17	5.98128e-17	90.0115	93.4145	90.5184	75.7878	74.9139	69.2912	95.8675	84.3074	82.4844	103.35	80.5772	89.5221	76.3148	89.6272	84.1669	90.0176	74.8494	68.4229	105.872	79.3334	74.652	75.688	101.679	97.1146	95.8009	92.7045	85.9938	79.1028	93.056	79.2305	59.9012	78.8533	78.6064	102.538
K7GLU6	K7GLU6	ERAP1	Sus scrofa	Aminopeptidase	15	16	extracellular region,endoplasmic reticulum membrane	membrane protein ectodomain proteolysis,regulation of blood pressure,antigen processing and presentation of endogenous peptide antigen via MHC class I,positive regulation of angiogenesis	interleukin-6 receptor binding,zinc ion binding,metalloaminopeptidase activity	FALSE	100	0.142224	5.97159	1.97339e-12	3.07097e-12	53.1424	79.5042	61.6899	62.7917	72.3023	54.691	54.928	51.1737	48.9164	68.5632	61.303	53.9184	67.3603	67.0686	56.4388	64.742	59.964	53.7578	75.8589	51.5261	68.3543	62.0689	81.8282	58.1358	54.1476	64.8895	68.0616	62.5828	66.6618	70.3126	41.1042	69.4793	63.0036	55.8241
K7GME6	K7GME6	S100A9	Sus scrofa	S100 calcium binding protein A9	2	2				FALSE	25	0.762363	4.37036	2.67901e-07	4.92063e-07	NaN	14.2798	NaN	64.1752	NaN	10.492	NaN	NaN	20.0581	17.0824	20.9278	NaN	NaN	NaN	NaN	NaN	NaN	NaN	19.912	NaN	NaN	NaN	24.4626	NaN	NaN	NaN	NaN	14.7707	NaN	NaN	NaN	6.10855	16.17	NaN
K7GPB6	K7GPB6	NCAM1	Sus scrofa	Neural cell adhesion molecule 1	15	16				FALSE	100	0.120213	6.55736	2.49454e-15	4.73214e-15	102.178	99.5237	104.486	83.2338	87.5868	104.378	101.494	89.8454	110.357	94.6553	93.9779	94.4023	95.1852	101.618	100.675	101.481	88.3862	92.112	95.226	88.9377	87.1395	94.0849	103.714	87.2123	99.5977	101.585	111.094	93.7978	113.071	98.3901	76.8391	91.3494	103.08	81.1321
K7GQL2	K7GQL2	F13A1	Sus scrofa	Coagulation factor XIII A chain	11	11		peptide cross-linking,blood coagulation, fibrin clot formation	protein-glutamine gamma-glutamyltransferase activity,metal ion binding	FALSE	100	0.316494	5.16305	5.60926e-15	1.002e-14	55.2921	31.1149	32.9091	79.8487	36.6889	45.8465	43.6063	36.6823	28.2398	28.8697	40.8396	35.9138	33.9694	33.019	41.8272	36.4657	38.1746	32.319	33.7321	37.8353	37.5137	33.4107	53.8852	29.731	24.8487	31.9491	33.3922	48.5283	35.106	44.8898	36.1983	19.7672	32.0432	50.8403
K7GQZ0	K7GQZ0	SHROOM2	Sus scrofa	Shroom family member 2	1	1	cell	establishment of melanosome localization,apical protein localization	actin filament binding	FALSE	29.5	0.908881	3.15218	7.73867e-08	1.45748e-07	NaN	NaN	NaN	NaN	3.98625	NaN	NaN	NaN	9.84931	NaN	NaN	15.7487	9.36151	NaN	NaN	NaN	NaN	5.04767	NaN	NaN	NaN	4.42652	NaN	NaN	NaN	19.4216	NaN	NaN	NaN	NaN	5.13734	NaN	2.21165	35.2519
K7GR72	K7GR72	SLC4A1	Sus scrofa	Anion exchange protein	8	8	integral component of plasma membrane,basolateral plasma membrane,cortical cytoskeleton	bicarbonate transport,chloride transmembrane transport	inorganic anion exchanger activity,bicarbonate transmembrane transporter activity,chloride transmembrane transporter activity,anion:anion antiporter activity,ankyrin binding,protein homodimerization activity	FALSE	48.2	0.716819	6.77032	1.17181e-08	2.26621e-08	NaN	104.134	122.318	552.342	113.582	117.861	NaN	NaN	NaN	NaN	NaN	NaN	NaN	NaN	101.202	NaN	79.1583	NaN	NaN	122.258	NaN	NaN	392.52	NaN	NaN	60.7975	150.464	NaN	129.896	NaN	180.103	NaN	103.709	NaN
K7GRK7	K7GRK7	TNXB	Sus scrofa	Tenascin XB	11	11	proteinaceous extracellular matrix,extracellular space	fatty acid metabolic process,triglyceride metabolic process,cell-matrix adhesion,collagen fibril organization,regulation of JUN kinase activity,cell-cell adhesion	collagen binding,heparin binding	FALSE	100	0.192046	5.01429	3.44297e-14	5.57649e-14	31.7182	43.2368	32.2229	33.4754	20.468	35.1402	37.3071	42.2465	31.8492	31.3354	31.2513	34.4794	37.2435	34.5606	34.7334	41.8532	33.7187	37.4904	43.7283	33.9906	32.7408	37.7988	30.5202	42.899	30.7316	30.7412	36.2727	44.3157	28.7138	25.7593	28.1773	34.3422	36.0151	36.38
K7GS31;Q95242	K7GS31;Q95242	PECAM1	Sus scrofa	Platelet and endothelial cell adhesion molecule 1;Platelet endothelial cell adhesion molecule	1	1	;plasma membrane,integral component of membrane,cell junction,membrane raft	;cell adhesion	;	FALSE	72.3	0.384411	3.97971	2.70153e-12	4.22984e-12	13.31	NaN	29.9594	18.1793	8.35124	9.60256	24.1902	NaN	16.1602	14.1424	12.63	15.5483	3.48044	26.3116	15.2563	15.8133	NaN	17.672	11.8681	NaN	NaN	13.3138	25.4493	NaN	24.9357	16.4793	NaN	NaN	28.6672	22.8282	28.9068	20.2582	20.8891	NaN
K7GSX9	K7GSX9	LOC100520832	Sus scrofa	C-type lectin domain-containing protein	6	10				FALSE	100	0.428006	5.9687	7.11154e-13	1.0939e-12	150.292	60.3571	70.8123	60.5405	161.444	117.623	72.0626	37.0997	78.6883	31.956	70.1727	73.1816	42.1207	48.1562	63.8491	49.2021	68.5323	77.5355	45.133	63.5309	76.6919	69.5479	29.4796	36.4074	54.8042	30.0087	40.363	84.5723	33.3239	115.005	72.6904	37.2432	67.3141	150.023
K9IVR7	K9IVR7	WDR1	Sus scrofa	WD repeat domain 1	4	4	plasma membrane,cell-cell junction,myelin sheath	neutrophil mediated immunity,regulation of cell shape,actin filament fragmentation,platelet formation,positive regulation of actin filament depolymerization,cortical cytoskeleton organization,establishment of planar polarity of follicular epithelium,apical junction assembly,maintenance of epithelial cell apical/basal polarity,sarcomere organization,regulation of ventricular cardiac muscle cell me…		TRUE	65.2	0.696018	3.84961	1.08146e-09	2.06036e-09	NaN	44.5975	NaN	76.6469	16.4383	16.0733	11.4508	5.36403	16.8151	19.0369	NaN	NaN	NaN	NaN	20.2722	NaN	12.7877	18.8534	9.6254	23.1341	NaN	13.8863	45.6409	19.2604	NaN	NaN	21.2354	NaN	20.1696	NaN	34.5025	NaN	7.9369	NaN
K9IVW4	K9IVW4	MTPN	Sus scrofa	Myotrophin	1	2	F-actin capping protein complex	regulation of cell size,positive regulation of cardiac muscle hypertrophy,regulation of barbed-end actin filament capping		FALSE	24.1	0.820297	3.12414	4.64827e-10	8.67279e-10	NaN	14.008	NaN	40.3641	NaN	NaN	NaN	NaN	NaN	5.79925	NaN	NaN	NaN	NaN	7.56887	NaN	NaN	NaN	NaN	4.81532	NaN	13.4315	23.2442	NaN	5.99208	NaN	3.52944	NaN	4.23247	NaN	9.46465	NaN	6.10499	NaN
K9J4T3	K9J4T3	ANTXR2	Sus scrofa	Anthrax toxin receptor	1	1	external side of plasma membrane,integral component of membrane	reproductive process,toxin transport	receptor activity,metal ion binding	FALSE	68.8	0.468639	5.05768	4.23383e-08	8.06048e-08	24.8932	35.3367	31.5603	NaN	NaN	NaN	50.0279	NaN	30.1529	37.2168	32.3021	NaN	NaN	NaN	44.0586	26.1809	43.4848	NaN	19.21	37.8093	27.733	33.0966	35.4745	30.3354	22.6854	86.5969	NaN	92.4207	NaN	33.9735	30.0411	40.4572	22.1339	72.2509
O02772	O02772	FABP3	Sus scrofa	Fatty acid-binding protein, heart	2	2	cytoplasm		lipid binding	FALSE	21.4	1.0089	4.19445	3.96696e-10	7.36693e-10	NaN	NaN	NaN	126.527	29.5504	10.1238	NaN	NaN	NaN	NaN	7.96659	NaN	NaN	NaN	NaN	NaN	NaN	NaN	NaN	NaN	NaN	NaN	NaN	NaN	NaN	NaN	13.6957	NaN	NaN	NaN	NaN	NaN	NaN	NaN
O02840;Q8WNW5	O02840;Q8WNW5	CDH5	Sus scrofa	Cadherin-5;Cadherin 5	21	24	plasma membrane,cell-cell junction,integral component of membrane,cell junction;cell-cell adherens junction,bicellular tight junction,external side of plasma membrane,integral component of membrane	blood vessel maturation,homophilic cell adhesion via plasma membrane adhesion molecules,regulation of complement-dependent cytotoxicity,regulation of establishment of cell polarity;blood vessel maturation,cell-cell junction assembly,homophilic cell adhesion via plasma membrane adhesion molecules,transforming growth factor beta receptor signaling pathway,negative regulation of cell proliferation,p…	calcium ion binding;receptor binding,calcium ion binding,beta-catenin binding,protein phosphatase binding,ion channel binding	FALSE	100	0.154892	6.44168	7.54561e-17	2.07448e-16	95.0445	91.158	86.4583	85.7343	64.5595	78.8323	89.0553	115.192	90.9114	108.26	83.6735	86.359	79.1566	108.711	87.5231	94.072	86.2201	95.2719	122.014	76.8176	88.8677	83.6168	78.8675	118.352	85.6254	84.3703	85.5312	120.906	86.5536	89.6837	55.5744	65.0921	81.4671	117.834
O11780	O11780	TGFBI	Sus scrofa	Transforming growth factor-beta-induced protein ig-h3	2	3	proteinaceous extracellular matrix,extracellular space,extracellular matrix	cell adhesion,cell proliferation,extracellular matrix organization	integrin binding,collagen binding,extracellular matrix binding	FALSE	100	0.177896	6.5083	3.98195e-14	6.41317e-14	76.3917	128.587	96.1676	74.4641	82.8689	82.8694	87.9411	85.885	94.0035	97.8094	93.963	55.8412	90.3169	109.705	95.8251	88.0135	94.3858	83.5441	129.095	88.7802	96.243	85.9202	77.971	120.305	68.4204	106.231	83.8301	105.185	89.4944	106.669	58.7033	86.7655	82.833	116.279
O19063	O19063	APCS	Sus scrofa	Serum amyloid P-component	10	20	extracellular space,extracellular matrix	negative regulation by host of viral exo-alpha-sialidase activity,negative regulation by host of viral glycoprotein metabolic process,innate immune response,negative regulation of monocyte differentiation,negative regulation of viral entry into host cell	complement component C1q binding,calcium ion binding,carbohydrate binding,identical protein binding,virion binding	FALSE	100	0.299953	7.81698	3.22303e-16	7.43498e-16	242.354	161.671	313.742	337.224	109.877	171.533	251.121	217.749	173.266	254.616	234.634	293.672	315.64	224.174	249.585	389.985	235.138	221.519	201.13	231.1	210.779	235.148	220.286	131.737	177.543	135.36	221.336	164.312	255.832	215.664	346.452	217.804	230.63	283.3
O46409	O46409	APOA4	Sus scrofa	Apolipoprotein A-IV	4	7	high-density lipoprotein particle,chylomicron,blood microparticle	cholesterol biosynthetic process,positive regulation of cholesterol esterification,positive regulation of triglyceride catabolic process,triglyceride catabolic process,regulation of intestinal cholesterol absorption,neuron projection regeneration,cholesterol efflux,phospholipid efflux,very-low-density lipoprotein particle remodeling,high-density lipoprotein particle assembly,lipoprotein metabolic…	cholesterol binding,cholesterol transporter activity,phosphatidylcholine binding,phosphatidylcholine-sterol O-acyltransferase activator activity	FALSE	100	0.177631	7.49672	6.00001e-15	1.06694e-14	155.547	123.854	140.434	135.359	201.104	176.704	169.002	233.377	216.145	177.939	189.303	188.573	191.919	188.207	148.338	206.703	182.973	168.962	199.911	165.07	163.25	189.892	227.74	136.964	217.753	195.014	154.674	199.008	225.334	205.465	160.387	128.418	194.265	159.368
O97763	O97763	NPC2	Sus scrofa	NPC intracellular cholesterol transporter 2	2	2	extracellular space,lysosome,endoplasmic reticulum	cholesterol metabolic process,response to virus,cholesterol transport,intracellular cholesterol transport,cholesterol efflux,cholesterol homeostasis	cholesterol binding,cholesterol transporter activity,enzyme binding	FALSE	67.9	0.367214	3.88091	0.000125649	0.000198153	NaN	22.0155	16.1243	18.631	13.8745	13.172	7.73527	10.0284	NaN	10.6733	15.7455	5.72589	10.7148	17.4647	24.1829	NaN	20.5458	24.4755	12.3442	10.4048	27.7791	8.4887	21.7249	17.8499	NaN	26.0593	15.219	19.3332	14.2506	16.79	12.7398	NaN	7.4948	NaN
P00336	P00336	LDHB	Sus scrofa	L-lactate dehydrogenase B chain	12	17	cytoplasm	carbohydrate metabolic process,carboxylic acid metabolic process,oxidation-reduction process	L-lactate dehydrogenase activity	FALSE	100	0.245832	6.80469	1.77464e-17	5.98128e-17	106.805	110.567	111.884	332.55	131.405	143.978	95.6271	124.039	94.5509	123.09	116.62	106.621	95.077	98.1697	104.111	100.3	98.4991	99.0554	114.513	124.611	116.457	120.621	166.11	118.839	108.783	107.047	154.37	115.485	135.316	104.767	132.397	103.89	121.946	109.076
P00339	P00339	LDHA	Sus scrofa	L-lactate dehydrogenase A chain	13	15	cytoplasm	carbohydrate metabolic process,carboxylic acid metabolic process,oxidation-reduction process	L-lactate dehydrogenase activity	FALSE	100	0.554697	5.46256	6.7132e-16	1.43352e-15	37.1826	63.7567	34.0605	79.0814	95.4559	105.183	52.5261	56.7753	25.5405	65.1751	53.3156	25.8518	30.4684	28.6099	43.7371	37.7472	49.4857	30.2974	36.274	50.1865	59.6845	55.0726	48.1668	32.9094	26.8345	51.0662	44.9887	25.0061	32.3731	28.7471	35.641	30.3097	41.4806	43.8937
P00355	P00355	GAPDH	Sus scrofa	Glyceraldehyde-3-phosphate dehydrogenase	13	24	nucleus,cytoplasm,cytosol,microtubule cytoskeleton,GAIT complex	microtubule cytoskeleton organization,glucose metabolic process,glycolytic process,regulation of translation,peptidyl-cysteine S-trans-nitrosylation,protein stabilization,neuron apoptotic process,oxidation-reduction process	glyceraldehyde-3-phosphate dehydrogenase (NAD+) (phosphorylating) activity,microtubule binding,peptidyl-cysteine S-nitrosylase activity,NADP binding,NAD binding	FALSE	91.1	0.923032	5.10775	1.77464e-17	5.98128e-17	11.6783	63.542	NaN	268.543	90.3736	105.74	45.3661	61.1283	5.14868	65.7822	50.5342	12.8421	9.35042	14.2142	47.1281	22.9974	37.5982	13.7546	13.7735	46.5361	51.3939	47.7436	70.1963	12.0168	9.58894	53.151	63.5725	15.9177	22.6745	12.5992	33.3731	13.8274	48.8445	30.7356
P00571	P00571	AK1	Sus scrofa	Adenylate kinase isoenzyme 1	5	6	cytoplasm	nucleoside diphosphate phosphorylation,nucleoside triphosphate biosynthetic process,ATP metabolic process	adenylate kinase activity,nucleoside diphosphate kinase activity,ATP binding	FALSE	58.9	0.766921	4.72733	7.70141e-12	1.23961e-11	NaN	47.7014	NaN	108.331	48.9745	46.6866	15.5017	19.8077	NaN	32.8842	22.6365	NaN	NaN	NaN	23.2204	4.20655	21.2783	NaN	11.1009	24.1144	17.4184	23.5751	31.3687	NaN	NaN	21.6127	28.4144	NaN	16.6372	NaN	20.7691	NaN	22.9235	NaN
P01025	P01025	C3	Sus scrofa	Complement C3	137	357	extracellular space	positive regulation of protein phosphorylation,fatty acid metabolic process,inflammatory response,complement activation, alternative pathway,complement activation, classical pathway,positive regulation of glucose transport,regulation of triglyceride biosynthetic process,positive regulation of lipid storage,negative regulation of endopeptidase activity,innate immune response,positive regulation of…	endopeptidase inhibitor activity,protein binding,C5L2 anaphylatoxin chemotactic receptor binding	FALSE	100	0.157559	12.7269	1.77464e-17	5.98128e-17	7728.14	5721.55	11082.6	6693.93	5722.03	7427.11	6566.67	8661.16	8782.44	5379.84	6701.8	8367.13	6785.37	6746.24	6693.88	8446.55	6769.38	6457.71	6882.54	6917.81	6559.37	6848.52	6014.26	7038.29	7558.73	7252.23	6939.9	6063.1	4841.16	5721.14	6460.75	8011.66	6753.46	4462.53
P02067	P02067	HBB	Sus scrofa	Hemoglobin subunit beta	6	12	hemoglobin complex	oxygen transport	oxygen transporter activity,iron ion binding,protein binding,oxygen binding,heme binding	FALSE	100	1.68635	11.4556	1.09779e-14	1.88002e-14	587.957	4245.33	613.027	82461.6	4962.52	8086.21	5593.22	6176.05	1274.54	3863.38	5764.86	616.106	382.175	627.032	5805.37	5432.8	8595.22	1615.93	1657.85	7742.48	6933.04	7785.87	23235.8	778.445	657.49	3151.18	25341.9	1612.5	5433.87	1868.56	7770.26	343.137	6203.42	1855.59
P02189	P02189	MB	Sus scrofa	Myoglobin	8	12		oxygen transport	oxygen transporter activity,oxygen binding,heme binding,metal ion binding	FALSE	57.1	0.748692	4.77371	3.45012e-17	1.05528e-16	NaN	50.1058	NaN	NaN	46.6605	40.8222	21.1106	29.9262	NaN	47.9363	25.0702	NaN	NaN	NaN	21.8164	NaN	26.0889	NaN	NaN	30.5861	26.9171	22.8622	18.4343	NaN	NaN	13.0672	13.1326	NaN	17.0823	NaN	18.9514	NaN	24.732	NaN
P04178	P04178	SOD1	Sus scrofa	Superoxide dismutase [Cu-Zn]	6	8	extracellular space,nucleus,nucleoplasm,cytoplasm,mitochondrion,peroxisome,cytosol,extracellular matrix,cytoplasmic vesicle,dendrite cytoplasm,macromolecular complex,neuronal cell body,myelin sheath,axon cytoplasm,plasma membrane	activation of MAPK activity,response to superoxide,ovarian follicle development,positive regulation of cytokine production,retina homeostasis,myeloid cell homeostasis,glutathione metabolic process,superoxide metabolic process,cellular iron ion homeostasis,spermatogenesis,embryo implantation,cell aging,sensory perception of sound,locomotory behavior,anterograde axonal transport,retrograde axonal t…	superoxide dismutase activity,copper ion binding,zinc ion binding,protein phosphatase 2B binding,identical protein binding,Rac GTPase binding,chaperone binding	FALSE	90.2	1.23877	5.38832	1.21471e-10	2.1656e-10	28.0341	53.8798	12.2057	636.685	50.074	84.8365	58.944	24.9175	9.61126	42.3009	64.8671	NaN	NaN	16.4045	50.8925	17.9836	63.4657	23.4446	26.1516	54.6929	46.3088	43.6529	142.322	21.9472	14.6635	29.6401	158.666	45.3805	38.5321	33.7333	64.6036	NaN	50.064	40.376
P04366	P04366	AMBP	Sus scrofa	Protein AMBP (Fragment)	17	41	extracellular region,plasma membrane	negative regulation of endopeptidase activity,protein-chromophore linkage	serine-type endopeptidase inhibitor activity,IgA binding,heme binding,protein homodimerization activity	FALSE	100	0.0682741	11.8379	4.23659e-17	1.25906e-16	3412.87	3980.49	3410.71	4056.34	3101.23	3422.42	3683.99	3454.38	3608.46	3690.83	3622.25	3071.45	3165.25	3921.63	3586.35	3808.45	3694.64	3932.32	3628.61	3492.89	3654.78	3407.63	3826.77	4087.53	3336.79	3448.29	3614.92	3641.56	4148.2	4002.41	3812.15	3476.17	3705.85	4216.93
P04404	P04404	CHGA	Sus scrofa	Chromogranin-A (Fragment)	4	4	extracellular region,secretory granule,transport vesicle membrane,mast cell granule	mast cell chemotaxis,mast cell cytokine production,negative regulation of catecholamine secretion,mast cell degranulation,mast cell activation,defense response to Gram-negative bacterium,defense response to Gram-positive bacterium,positive regulation of dense core granule biogenesis		FALSE	89.3	0.416059	3.33457	7.31165e-11	1.27836e-10	20.6255	NaN	8.69275	3.82235	12.0285	13.5858	NaN	10.159	17.3511	11.1471	10.3086	24.0223	NaN	11.3989	9.32363	5.26054	10.0411	17.9347	7.15829	12.4038	11.0584	NaN	11.4193	8.28799	11.6359	8.10194	NaN	11.3579	14.7704	11.9893	15.1052	6.09395	17.4323	NaN
P04574	P04574	CAPNS1	Sus scrofa	Calpain small subunit 1	5	5	cytoplasm,plasma membrane	proteolysis	calcium-dependent cysteine-type endopeptidase activity,calcium ion binding	TRUE	98.2	0.37131	3.59718	8.69869e-10	1.64953e-09	11.0471	15.7069	5.87706	39.7711	10.3598	13.2142	17.5573	17.8488	8.14235	10.1095	11.1035	15.2646	17.1906	19.9771	16.4415	11.5118	10.4463	NaN	15.324	9.59291	9.89823	13.4127	25.5822	9.7451	11.4635	8.86192	18.6871	15.0432	10.7618	10.6704	10.696	9.13416	9.94226	5.3379
P06867	P06867	PLG	Sus scrofa	Plasminogen	6	13	extracellular region	proteolysis,blood coagulation,fibrinolysis,tissue remodeling,interaction with symbiont via secreted substance involved in symbiotic interaction	serine-type endopeptidase activity	FALSE	100	0.136324	10.0305	8.76619e-16	1.82362e-15	1051.44	1011.01	1018.32	1026.82	1245.81	1019.04	1059.58	588.831	976.971	609.348	1058.61	991.472	1124.1	1146.15	1055.9	924.025	1030.5	1201.79	1027.48	1101.41	1026.44	1030.11	1045.04	952.041	1008.53	989.396	1006.56	1158.52	1116.79	1312.12	625.266	1177.12	1014.03	1038.02
P08059	P08059	GPI	Sus scrofa	Glucose-6-phosphate isomerase	11	15	extracellular space,cytoplasm	angiogenesis,gluconeogenesis,glycolytic process,regulation of receptor activity	glucose-6-phosphate isomerase activity,cytokine activity	FALSE	83.9	0.592975	4.16765	2.01831e-13	3.12007e-13	11.0733	15.8219	17.2242	97.2316	23.1384	36.467	15.8559	19.6122	11.2571	21.388	17.353	9.58414	NaN	NaN	16.0093	12.0167	19.5967	NaN	8.98298	18.9525	22.064	21.333	30.4886	12.8947	16.0861	17.8753	36.2283	NaN	16.0749	14.2243	22.3146	5.32981	17.1816	NaN
P08835	P08835	ALB	Sus scrofa	Albumin	95	226	extracellular space,macromolecular complex	cellular response to starvation,hemolysis by symbiont of host erythrocytes,negative regulation of apoptotic process,maintenance of mitochondrion location	DNA binding,fatty acid binding,drug binding,toxic substance binding,pyridoxal phosphate binding,small molecule binding,metal ion binding,oxygen binding	FALSE	100	0.105006	14.942	1.77464e-17	5.98128e-17	30706	33345.6	31085.8	26961.5	26822.5	31918.6	34139.3	33895	37065.5	33405.6	30722.2	32958.2	33022.4	32881.1	33395.9	30885.9	29811.8	30705.7	38775.3	31666.1	33831.7	31658.7	35230.1	31903	30524.1	31637.6	33665.1	35101.8	30761.2	25726.2	28049.3	26730.5	31625.9	32303.8
P09571	P09571	TF	Sus scrofa	Serotransferrin	82	203	extracellular space,cell	cellular iron ion homeostasis,ferric iron transport	ferric iron binding,ferric iron transmembrane transporter activity	FALSE	100	0.0933843	14.398	1.77464e-17	5.98128e-17	21583.3	22112.4	19182.1	23091.3	20339.9	20988.6	21503.3	22757.7	19136.7	25688.4	21134.7	18446.5	16067.1	25788.8	21138	18962.8	21765.1	24372.3	25706.7	21570.2	21277.9	21593.4	21790.4	21929.6	19937.7	21510.4	23382.6	23108.6	19256.9	24943.5	23567.9	18942.3	21370.4	23695.3
P0DSN9	P0DSN9	SAA4	Sus scrofa	Serum amyloid A-4 protein	9	13				FALSE	95.5	0.374751	6.25889	9.78348e-17	2.60098e-16	49.1016	62.6173	53.006	66.2046	156.832	76.8154	80.249	NaN	10.8973	67.714	74.3173	52.0689	122.91	48.8117	86.8343	60.8062	79.4198	59.9801	137.475	83.8795	77.3345	85.84	32.527	36.8565	66.9371	71.8249	92.5842	51.9762	55.929	70.9111	113.621	91.076	72.2526	70.3332
P10668	P10668	CFL1	Sus scrofa	Cofilin-1	12	17	cytoplasm,actin cytoskeleton,nuclear matrix,lamellipodium,lamellipodium membrane,ruffle membrane	cytoskeleton organization,regulation of cell morphogenesis,actin filament depolymerization	actin filament binding	FALSE	100	0.847774	5.29737	1.11635e-12	1.72322e-12	26.9643	72.2023	24.652	283.95	51.5356	35.4499	45.0607	42.8616	32.5783	55.0499	44.4842	29.8867	22.0325	33.5327	42.8557	27.7552	49.0405	24.7454	30.6934	51.5423	48.3286	46.4482	216.774	26.0787	29.9071	36.1321	54.6225	25.2333	55.655	29.6966	184.862	26.8021	53.1791	36.5038
P11708	P11708	MDH1	Sus scrofa	Malate dehydrogenase, cytoplasmic	6	7	mitochondrion,cytosol	carbohydrate metabolic process,tricarboxylic acid cycle,oxaloacetate metabolic process,malate metabolic process,NADH metabolic process	L-malate dehydrogenase activity,NAD binding	FALSE	99.1	0.771484	4.76707	6.37521e-15	1.1291e-14	18.2103	36.9516	24.3389	233.106	50.7216	44.3158	34.8569	44.9915	12.7368	31.5561	33.9732	13.7998	15.9442	25.2269	34.7011	13.4562	27.0212	28.7715	19.5758	35.419	31.4205	25.3565	66.792	17.3297	24.1483	21.736	64.9591	9.76817	27.9873	6.71617	33.8661	8.3093	30.2417	38.47
P12026	P12026	DBI	Sus scrofa	Acyl-CoA-binding protein	2	2	endoplasmic reticulum,Golgi apparatus	defense response to bacterium	fatty-acyl-CoA binding,lipid binding	FALSE	60.7	0.726972	4.61388	4.47232e-10	8.33513e-10	3.05	24.0623	NaN	155.202	12.5468	19.5772	13.8967	24.6748	10.6569	NaN	22.8507	NaN	NaN	NaN	NaN	NaN	21.7023	5.85311	NaN	40.5324	43.5709	20.057	42.6707	NaN	7.78006	33.3322	26.3674	NaN	37.1705	NaN	45.8119	NaN	21.413	NaN
P12067	P12067		Sus scrofa	Lysozyme C-1	7	8	extracellular region	digestion,metabolic process,cytolysis,defense response to bacterium	lysozyme activity	FALSE	100	0.229467	6.24973	3.14006e-16	7.26453e-16	104.701	72.8686	88.2254	78.9265	63.0492	93.6443	77.3045	96.8628	79.1396	62.7727	80.633	80.1763	78.3228	55.7617	86.4914	68.2196	84.0036	115.237	60.3656	73.348	77.1696	75.1459	64.1506	80.8567	118.937	84.2912	52.7917	37.289	64.1709	82.602	99.4797	88.8458	80.8303	110.411
P12309	P12309	GLRX	Sus scrofa	Glutaredoxin-1	3	4	cytoplasm	electron transport chain,cell redox homeostasis	electron carrier activity,protein disulfide oxidoreductase activity	FALSE	16.1	0.755628	3.47629	2.06773e-07	3.81824e-07	NaN	2.80342	NaN	42.3408	NaN	7.43127	NaN	NaN	NaN	21.6058	16.334	NaN	NaN	NaN	14.4083	NaN	NaN	NaN	NaN	NaN	NaN	NaN	16.3257	NaN	NaN	NaN	9.97428	NaN	NaN	NaN	NaN	NaN	NaN	NaN
P14287	P14287	SPP1	Sus scrofa	Osteopontin	14	17	extracellular space,Golgi apparatus	osteoblast differentiation,androgen catabolic process,cell adhesion,regulation of receptor activity,biomineral tissue development,response to vitamin D,positive regulation of bone resorption,positive regulation of transcription, DNA-templated,cellular response to testosterone stimulus,positive regulation of estradiol secretion	cytokine activity,extracellular matrix binding	FALSE	100	0.169764	6.10692	3.75873e-17	1.13587e-16	65.5	67.4187	72.3272	59.8915	55.0636	87.4545	70.8654	96.4139	71.9474	88.3228	61.234	70.9533	78.635	91.2427	77.1066	68.0545	58.4693	63.3618	66.709	71.9867	75.6718	58.8705	56.3938	88.1471	85.8906	60.9536	63.8784	94.2008	81.7019	91.3394	57.5146	63.1751	67.4641	87.4258
P14460	P14460	FGA	Sus scrofa	Fibrinogen alpha chain (Fragment)	2	2	extracellular region	adaptive immune response,blood coagulation,innate immune response		FALSE	16.1	0.86451	3.80818	0.000680044	0.000991198	NaN	NaN	NaN	12.2701	18.5198	NaN	NaN	28.6782	NaN	16.2044	NaN	NaN	NaN	NaN	NaN	NaN	NaN	27.3924	NaN	NaN	11.7634	NaN	10.8192	NaN	NaN	NaN	NaN	NaN	6.93724	NaN	NaN	7.55164	NaN	NaN
P15468	P15468	RNASE4	Sus scrofa	Ribonuclease 4	7	8	extracellular region	RNA phosphodiester bond hydrolysis	nucleic acid binding,endonuclease activity,ribonuclease activity	FALSE	100	0.171908	6.11881	1.77464e-17	5.98128e-17	77.6184	88.8002	76.6184	71.2042	51.8892	58.7553	82.8717	94.2651	73.3321	68.3232	69.3701	95.7336	71.3316	92.3215	68.2967	70.3501	65.493	85.4783	61.9695	72.8082	77.7016	65.4884	80.0236	83.1716	91.5852	77.4609	44.5798	77.573	58.1314	73.8244	80.259	82.4863	65.4637	88.6786
P16225	P16225		Sus scrofa	Sodium/potassium ATPase inhibitor SPAI-2	4	4	extracellular region	copulation,negative regulation of peptidase activity	peptidase inhibitor activity	TRUE	83.9	0.520194	4.77185	1.15241e-12	1.77951e-12	61.6509	NaN	41.5422	36.7089	24.5997	62.762	16.1048	14.8704	28.0219	16.1733	33.3852	10.9381	NaN	58.1495	37.5412	16.0382	NaN	17.0145	NaN	24.9771	46.082	27.6495	36.9767	NaN	24.3382	11.7105	29.1178	28.9981	55.1626	57.4435	23.4635	NaN	19.1782	29.2157
P16545	P16545	IGF1	Sus scrofa	Insulin-like growth factor I	1	1	extracellular space,plasma membrane,alphav-beta3 integrin-IGF-1-IGF1R complex,exocytic vesicle	positive regulation of cell proliferation,regulation of receptor activity,negative regulation of apoptotic process,positive regulation of glycogen biosynthetic process,positive regulation of DNA replication,positive regulation of glucose import,insulin-like growth factor receptor signaling pathway,negative regulation of release of cytochrome c from mitochondria	insulin-like growth factor receptor binding,hormone activity,growth factor activity	FALSE	62.5	0.339863	4.81078	2.81021e-08	5.384e-08	NaN	27.301	29.2646	30.9915	NaN	25.6545	15.3955	37.1594	22.4302	NaN	24.7483	NaN	34.9037	NaN	33.908	NaN	9.75908	26.4516	28.9776	22.4015	40.0774	41.441	27.4886	NaN	43.9111	52.6957	NaN	41.5582	NaN	22.261	NaN	NaN	10.2367	NaN
P18648	P18648	APOA1	Sus scrofa	Apolipoprotein A-I	37	93	extracellular space,high-density lipoprotein particle,chylomicron,blood microparticle	cholesterol biosynthetic process,positive regulation of cholesterol esterification,positive regulation of triglyceride catabolic process,protein oxidation,peptidyl-methionine modification,triglyceride catabolic process,regulation of intestinal cholesterol absorption,neuron projection regeneration,cholesterol efflux,phospholipid efflux,very-low-density lipoprotein particle remodeling,high-density …	cholesterol binding,cholesterol transporter activity,phosphatidylcholine binding,phosphatidylcholine-sterol O-acyltransferase activator activity,high-density lipoprotein particle receptor binding	FALSE	100	0.137266	14.1035	1.77464e-17	5.98128e-17	16094.2	17016.2	14152	14982.1	19259.7	15507.9	16529.2	17144.2	16407.4	18626.4	17544.5	18741.5	22768.4	18077.3	16191.6	19502.1	18279.4	20772.5	17658.4	18680.7	15783.1	18736.2	17721.6	15241.2	14677.1	16922.5	21046.9	16945.5	19289.8	11790.9	10795.8	15474	17333.1	16399.3
P19205	P19205	APEH	Sus scrofa	Acylamino-acid-releasing enzyme	14	15	cytoplasm	proteolysis	serine-type endopeptidase activity	FALSE	28.6	1.22154	4.07299	5.08769e-10	9.51713e-10	NaN	7.34143	NaN	168.804	NaN	NaN	NaN	NaN	NaN	NaN	NaN	NaN	NaN	NaN	NaN	8.47182	NaN	NaN	NaN	13.89	NaN	NaN	31.2712	NaN	NaN	NaN	31.9447	NaN	NaN	NaN	32.1967	NaN	8.80212	NaN
P20112	P20112	SPARC	Sus scrofa	SPARC	6	6	basement membrane,extracellular space	signal transduction,anatomical structure development	calcium ion binding,collagen binding,extracellular matrix binding	FALSE	100	0.206439	5.47509	1.77464e-17	5.98128e-17	46.5327	47.9876	51.0882	44.6125	36.8447	36.2166	56.5319	62.0099	48.0895	39.2301	41.5607	37.5368	38.6395	40.1079	49.093	49.1788	44.8675	37.1919	57.0813	47.6171	47.3411	35.6068	39.4417	55.5995	52.4609	43.9522	36.8692	54.5215	36.9964	45.6802	42.7603	39.323	49.8687	26.1257
P20305	P20305	GSN	Sus scrofa	Gelsolin (Fragment)	2	10	extracellular region,cytosol,cytoskeleton	actin filament polymerization,actin nucleation,actin filament severing,barbed-end actin filament capping,cilium morphogenesis	calcium ion binding,actin filament binding	TRUE	100	0.351787	8.84894	5.52278e-13	8.48847e-13	567.846	339.756	369.783	511.502	443.111	273.373	655.654	485.805	371.021	668.457	518.685	433.277	545.746	568.495	702.925	419.713	289.511	444.18	906.933	484.241	576.154	490.794	558.272	479.262	414.141	287.958	403.452	531.868	402.911	528.106	356.17	355.501	333.043	755.995
P22411	P22411	DPP4	Sus scrofa	Dipeptidyl peptidase 4	3	3	extracellular region,cell surface,integral component of membrane,apical plasma membrane,lamellipodium,endocytic vesicle,lamellipodium membrane,membrane raft,intercellular canaliculus,invadopodium membrane	behavioral fear response,response to hypoxia,proteolysis,cell adhesion,positive regulation of cell proliferation,negative regulation of extracellular matrix disassembly,T cell costimulation,regulation of cell-cell adhesion mediated by integrin,locomotory exploration behavior,psychomotor behavior,T cell activation,endothelial cell migration,viral entry into host cell	virus receptor activity,protease binding,serine-type endopeptidase activity,receptor binding,dipeptidyl-peptidase activity,protein homodimerization activity	FALSE	97.3	0.243139	4.71312	2.0973e-09	4.03929e-09	32.3756	14.6888	13.714	23.6626	26.7601	24.1674	23.7554	11.8547	27.6115	27.8522	30.1525	40.4054	34.8015	39.7438	27.0013	26.8561	32.8936	22.2263	32.5225	22.524	19.9301	25.0672	40.1219	19.7149	30.2667	20.3839	34.1093	15.9514	30.8865	16.7439	34.9456	28.0035	31.5423	30.276
P24853	P24853	IGFBP2	Sus scrofa	Insulin-like growth factor-binding protein 2	11	15	extracellular region,extracellular space	regulation of cell growth,response to insulin,positive regulation of activated T cell proliferation,regulation of insulin-like growth factor receptor signaling pathway,positive regulation of growth	insulin-like growth factor I binding,insulin-like growth factor II binding	FALSE	100	0.280231	6.89737	2.18862e-15	4.19622e-15	135.215	133.641	130.478	105.582	186.777	156.951	113.299	72.8068	123.066	103.082	116.86	150.953	105.576	130.1	128.747	99.2102	123.195	123.676	62.7024	135.854	118.347	129.077	146.032	135.925	74.7868	72.5624	90.7328	136.998	212.502	160.848	242.2	76.1122	113.48	208.057
P26234	P26234	VCL	Sus scrofa	Vinculin	30	30	podosome,cell-cell junction,adherens junction,fascia adherens,focal adhesion,sarcolemma,costamere	morphogenesis of an epithelium,cell adhesion,lamellipodium assembly,regulation of cell migration,adherens junction assembly,protein localization to cell surface,apical junction assembly,axon extension,epithelial cell-cell adhesion	dystroglycan binding,structural molecule activity,ubiquitin protein ligase binding,alpha-catenin binding,cadherin binding,actin filament binding	FALSE	100	0.147136	5.10352	1.43121e-16	3.62858e-16	29.4583	36.0408	30.1772	50.5204	45.6039	33.7355	28.7426	38.6626	30.667	39.0427	39.5243	35.1238	32.338	34.8376	27.7237	36.7194	32.4592	29.4997	35.9482	34.9889	31.2541	32.9065	52.4577	32.8636	30.173	26.4661	37.3428	32.0449	41.3226	34.4501	42.4742	31.1595	35.7278	42.9629
P27485	P27485	RBP4	Sus scrofa	Retinol-binding protein 4	11	27	extracellular space	retinol transport	retinal binding,retinol binding,retinol transporter activity	FALSE	100	0.106667	9.86845	1.77464e-17	5.98128e-17	1140.66	967.169	687.923	1034.99	903.391	1154.31	911.401	905.978	857.516	771.697	938.368	973.626	739.159	957.991	996.208	864.359	986.79	1019.51	976.139	939.011	914.384	905.857	1011.54	804.843	759.251	910.671	1071.59	921.17	858.093	1015.13	813.805	850.898	903.435	939.99
P27917	P27917	APOC3	Sus scrofa	Apolipoprotein C-III	6	10	extracellular matrix,very-low-density lipoprotein particle,intermediate-density lipoprotein particle,spherical high-density lipoprotein particle,chylomicron	lipid transport,G-protein coupled receptor signaling pathway,negative regulation of triglyceride catabolic process,negative regulation of very-low-density lipoprotein particle remodeling,negative regulation of very-low-density lipoprotein particle clearance,negative regulation of high-density lipoprotein particle clearance,negative regulation of low-density lipoprotein particle clearance,triglyce…	phospholipid binding,lipase inhibitor activity,high-density lipoprotein particle receptor binding	FALSE	100	0.261818	10.8948	9.73339e-17	2.58935e-16	1231.42	1427.06	1263.49	1425.55	1948.31	2874.4	1975.26	1538.48	1406.65	1573.94	2342.2	1859.65	2484.58	1358.18	2128.47	1919.18	1943.8	1619.41	2057.96	2275.62	2164.48	2231.48	510.562	1076.87	1329.14	1679.36	2995.58	1968.02	1551.03	1923.15	1188.85	1979.37	2413.34	1121.3
P28491	P28491	CALR	Sus scrofa	Calreticulin	1	1	extracellular space,nuclear envelope,cytosol,polysome,external side of plasma membrane,sarcoplasmic reticulum lumen,MHC class I peptide loading complex,endoplasmic reticulum quality control compartment,perinuclear region of cytoplasm	negative regulation of transcription from RNA polymerase II promoter,peptide antigen assembly with MHC class I protein complex,protein folding,protein export from nucleus,positive regulation of cell proliferation,positive regulation of endothelial cell migration,positive regulation of gene expression,negative regulation of translation,cortical actin cytoskeleton organization,negative regulation o…	mRNA binding,integrin binding,calcium ion binding,carbohydrate binding,ubiquitin protein ligase binding,androgen receptor binding,unfolded protein binding	FALSE	25	0.412649	2.71222	3.10721e-06	5.43312e-06	NaN	5.89184	NaN	9.75108	NaN	7.87282	NaN	NaN	NaN	4.78596	NaN	NaN	NaN	NaN	NaN	NaN	NaN	NaN	NaN	NaN	NaN	NaN	NaN	NaN	NaN	6.12435	NaN	NaN	NaN	1.86476	NaN	NaN	4.52865	NaN
P28839	P28839	LAP3	Sus scrofa	Cytosol aminopeptidase	3	3	cytoplasm	proteolysis	aminopeptidase activity,metal ion binding	FALSE	59.8	0.585245	3.78752	1.24114e-07	2.31593e-07	11.4284	12.4891	21.1989	52.0036	NaN	11.4535	NaN	20.198	NaN	4.03824	16.0884	7.0603	14.2304	14.119	10.1449	15.5086	9.49191	11.7895	12.4888	18.1289	5.98878	NaN	10.0942	21.2542	15.8033	18.4018	20.3362	NaN	14.1913	NaN	NaN	14.9936	16.8627	NaN
P29700	P29700	AHSG	Sus scrofa	Alpha-2-HS-glycoprotein (Fragment)	13	35	extracellular matrix,blood microparticle	acute-phase response,negative regulation of endopeptidase activity,negative regulation of bone mineralization,regulation of inflammatory response,positive regulation of phagocytosis,negative regulation of biomineral tissue development	endopeptidase inhibitor activity,cysteine-type endopeptidase inhibitor activity	FALSE	100	0.101716	13.762	3.92433e-16	8.8603e-16	12233.5	15489.4	12193.3	13345.4	15141.7	12170.7	13661.4	12536.2	11472.9	14867.7	13349.9	12056.5	12871.7	16632.8	13660.5	14899.6	13547.1	11934.1	14458	14384.2	13978	13836.9	15634.4	14015.5	13029.7	11023.1	13383.1	15275.5	16128.6	14958.6	15013.8	11691.9	13452.5	17726.3
P30930	P30930	LCAT	Sus scrofa	Phosphatidylcholine-sterol acyltransferase	1	1	extracellular region	cholesterol metabolic process,cholesterol esterification,phosphatidylcholine metabolic process	phosphatidylcholine-sterol O-acyltransferase activity	FALSE	100	0.184293	6.70621	3.53339e-15	6.52393e-15	114.069	115.165	90.3953	93.5664	68.396	81.2017	124.251	100.251	121.722	91.7812	89.4044	110.287	92.2084	105.563	122.261	83.7896	115.924	80.9923	140.317	125.413	100.647	97.7078	106.302	90.9173	113.714	123.562	127.496	82.9695	71.753	71.1979	55.3476	75.7359	113.246	69.2679
P31346;Q1HDU1	P31346;Q1HDU1	ANG;ANG1	Sus scrofa	Angiogenin	1	1	extracellular region,nucleus,nucleolus,growth cone,cytoplasmic vesicle,neuronal cell body;	angiogenesis,negative regulation of translation,cell differentiation,RNA phosphodiester bond hydrolysis;	DNA binding,endonuclease activity,ribonuclease activity,protein homodimerization activity;	FALSE	72.3	0.48729	3.7383	3.44964e-16	7.89842e-16	5.53888	16.4262	14.9968	13.4001	5.70721	18.1918	9.54821	12.4372	27.5299	NaN	15.2345	23.9261	NaN	19.8406	28.7468	9.51849	8.60998	NaN	NaN	2.41923	29.595	17.5997	12.1343	26.5921	9.56264	19.4168	12.2666	21.6132	29.0566	18.0495	8.26213	13.6559	11.6662	NaN
P32196	P32196	NPG3	Sus scrofa	Protegrin-3	5	7	extracellular region	defense response to bacterium		FALSE	100	0.373341	5.33168	1.77464e-17	5.98128e-17	82.0762	31.7145	39.0144	80.3578	39.3596	38.5694	40.6129	32.6088	86.6443	62.188	43.0625	47.2463	28.0452	67.7905	44.4165	28.8644	44.3481	35.3237	33.8841	41.7949	39.4768	40.7081	53.884	57.8896	52.237	20.2338	47.721	39.1071	45.3159	43.3206	27.0727	36.3225	31.5788	81.0965
P43030	P43030	PPBP	Sus scrofa	Platelet basic protein	7	15	extracellular space	inflammatory response,immune response,G-protein coupled receptor signaling pathway,regulation of receptor activity,response to lipopolysaccharide,regulation of cell proliferation,positive regulation of cell division,cell chemotaxis,chemokine-mediated signaling pathway,positive regulation of neutrophil chemotaxis	chemokine activity,growth factor activity,CXCR chemokine receptor binding	FALSE	100	0.264836	8.29648	4.73677e-13	7.28002e-13	394.26	399.902	412.359	287.845	333.685	249.544	340.705	351.952	430.841	302.691	322.918	498.712	439.907	464.481	326.572	319.197	336.236	431.128	297.005	318.866	329.822	320.697	371.264	435.417	341.28	415.741	77.5092	344.008	250.528	340.962	452.825	410.723	330.235	348.653
P48819	P48819	VTN	Sus scrofa	Vitronectin	11	24	extracellular space,extracellular matrix	receptor-mediated endocytosis,immune response,cell adhesion	scavenger receptor activity,heparin binding,polysaccharide binding	FALSE	100	0.143832	9.90148	8.73466e-16	1.81769e-15	754.169	1260.87	830.011	894.303	842.908	907.279	892.39	1240.51	1062.59	921.63	890.605	960.889	990.452	1032.08	965.011	850.537	817.233	1038	906.261	870.457	881.825	816.145	1240.25	1241.91	1179.16	1323.16	1075.97	1071.71	936.46	1125.4	1176.28	1153.86	848.219	1066.36
P50447	P50447	SERPINA1	Sus scrofa	Alpha-1-antitrypsin	24	63	extracellular space	negative regulation of endopeptidase activity	serine-type endopeptidase inhibitor activity	FALSE	100	0.0771744	12.8404	1.77464e-17	5.98128e-17	7089.43	9025.25	6571.11	7245.76	7090.8	7539.56	7148.71	7831.83	7808.46	8332.25	6921.5	6916.56	7236.2	6652.2	7068.68	7220.41	7160.08	7952.47	6949.46	7138.91	6943.5	7252.86	6900.94	7986.51	7554.26	7552.84	7250.12	7552.63	6331.96	7108.71	6404.73	6997.21	7343.14	9267.45
P50828	P50828	HPX	Sus scrofa	Hemopexin	29	75	extracellular region,cell	cellular iron ion homeostasis,metabolic process,heme transport	hyalurononglucosaminidase activity,heme transporter activity,metal ion binding	FALSE	100	0.0920545	13.5584	1.77464e-17	5.98128e-17	11299.7	12058.8	13280.4	12848.6	13980.7	10563.7	10773.2	11058.2	11260.8	12746.4	11253	10258.2	13198.8	12256	10820.3	11140.2	11892.3	14381.9	12840.7	11900.2	11207	11814.4	13227.3	12463.1	13245.3	13331.4	11667	13614.1	13035.1	13235.4	10807.1	13162.2	11298.3	13132.3
P51779	P51779	CFD	Sus scrofa	Complement factor D	9	13	extracellular space	proteolysis,complement activation, alternative pathway	serine-type endopeptidase activity	FALSE	100	0.142158	5.71798	9.63653e-17	2.56686e-16	64.9548	59.9675	37.5453	45.122	59.4329	57.6148	44.5457	49.1577	56.6105	56.8063	57.9466	66.2576	45.5485	61.99	61.5116	41.4012	52.749	42.7262	51.3826	48.8773	64.6313	48.5233	63.5608	47.3871	55.1755	53.9978	49.3952	55.5895	60.7595	52.8042	58.0045	56.6759	50.1323	60.2571
P62936	P62936	PPIA	Sus scrofa	Peptidyl-prolyl cis-trans isomerase A	10	13	extracellular region,nucleus,cytosol	protein peptidyl-prolyl isomerization,protein folding,regulation of viral genome replication	peptidyl-prolyl cis-trans isomerase activity	FALSE	99.1	0.82	5.62695	4.77072e-13	7.33215e-13	40.9015	71.4037	38.375	410.493	56.659	37.4156	52.2161	68.6084	35.5102	58.901	56.6158	44.8894	28.2631	41.5488	56.1199	33.3614	62.2037	32.9848	37.9674	61.1416	62.7121	58.7176	201.171	28.679	38.0165	39.16	90.7354	31.5209	71.5464	35.0655	144.455	29.6449	55.3819	37.8075
P67937	P67937	TPM4	Sus scrofa	Tropomyosin alpha-4 chain	17	21	muscle thin filament tropomyosin,actin filament,actin cytoskeleton	muscle contraction,actin filament organization	structural constituent of muscle,identical protein binding,protein homodimerization activity,metal ion binding,protein heterodimerization activity,actin filament binding	FALSE	100	1.14501	5.36667	2.00084e-13	3.09341e-13	22.2495	96.9472	19.0395	310.573	49.06	32.8811	63.3261	50.1643	24.1623	59.248	54.351	34.2809	11.5029	26.2044	62.6525	27.8291	53.9844	22.0605	31.0296	62.3685	58.2576	55.7913	414.798	19.9022	30.3552	43.0947	55.2002	15.141	74.6321	25.1927	305.962	31.9797	55.3893	24.8223
P79263	P79263	ITIH4	Sus scrofa	Inter-alpha-trypsin inhibitor heavy chain H4	4	8	extracellular region	acute-phase response,negative regulation of endopeptidase activity,hyaluronan metabolic process,response to cytokine	serine-type endopeptidase inhibitor activity	FALSE	100	0.250662	8.85053	5.39427e-12	8.59157e-12	658.415	474.171	553.411	432.977	651.519	570.439	498.247	412.571	412.484	618.873	440.473	440.882	619.511	384.192	480.982	276.513	487.188	508.121	446.023	418.333	423.531	467.446	403.127	564.968	782.857	427.963	341.303	513.512	249.898	612.28	861.17	639.426	475.612	450.082
P80276	P80276	AKR1B1	Sus scrofa	Aldo-keto reductase family 1 member B1	4	4	cytoplasm	oxidation-reduction process	alditol:NADP+ 1-oxidoreductase activity	FALSE	9.8	0.518372	3.4211	8.62359e-07	1.54668e-06	NaN	NaN	NaN	23.7923	NaN	NaN	NaN	NaN	NaN	NaN	9.02945	NaN	NaN	NaN	NaN	NaN	NaN	NaN	NaN	NaN	NaN	NaN	NaN	NaN	NaN	NaN	NaN	NaN	NaN	NaN	NaN	NaN	NaN	NaN
P80310	P80310	S100A12	Sus scrofa	Protein S100-A12	2	2	extracellular region,nucleus,cytoplasm,cytoskeleton,plasma membrane	xenobiotic metabolic process,inflammatory response,killing of cells of other organism,positive regulation of I-kappaB kinase/NF-kappaB signaling,innate immune response,defense response to fungus,Requires Ontology	calcium ion binding,zinc ion binding,RAGE receptor binding	FALSE	30.4	0.754469	3.60518	0.000832206	0.00119919	NaN	NaN	NaN	22.7181	19.9575	24.2622	9.52557	17.5134	30.1089	NaN	NaN	NaN	7.15189	7.67743	8.99906	NaN	NaN	NaN	NaN	NaN	NaN	NaN	NaN	NaN	NaN	NaN	16.0497	NaN	NaN	9.12901	NaN	NaN	2.86629	NaN
P80928	P80928	MIF	Sus scrofa	Macrophage migration inhibitory factor	4	6	extracellular space,nucleoplasm,cytosol,cell surface,myelin sheath	prostaglandin biosynthetic process,negative regulation of mature B cell apoptotic process,inflammatory response,cell surface receptor signaling pathway,cell aging,cell proliferation,regulation of receptor activity,negative regulation of gene expression,positive regulation of protein kinase A signaling,negative regulation of macrophage chemotaxis,DNA damage response, signal transduction by p53 cla…	protease binding,dopachrome isomerase activity,cytokine activity,cytokine receptor binding,chemoattractant activity,identical protein binding,phenylpyruvate tautomerase activity	FALSE	89.3	1.001	4.78295	1.41485e-15	2.81589e-15	18.9729	41.8914	NaN	294.675	40.1911	44.8461	36.181	43.7385	12.0368	25.298	37.4299	11.7238	11.0019	12.537	35.9174	13.8877	36.0654	17.9262	16.6492	47.2007	41.5605	35.1327	92.3579	10.7256	4.98406	25.6824	105.231	NaN	35.2686	14.5598	60.4573	NaN	43.7889	NaN
P81693	P81693	ACP1	Sus scrofa	Low molecular weight phosphotyrosine protein phosphatase	2	2	cytosol,cytoplasmic side of plasma membrane,sarcolemma	peptidyl-tyrosine dephosphorylation	acid phosphatase activity,non-membrane spanning protein tyrosine phosphatase activity	FALSE	23.2	1.25324	4.41232	2.59334e-08	4.97402e-08	NaN	NaN	NaN	206.528	25.2827	12.2193	NaN	21.0829	NaN	26.7609	3.96991	NaN	NaN	NaN	9.22465	NaN	7.21958	NaN	NaN	8.71293	NaN	NaN	45.0027	NaN	NaN	NaN	34.2957	NaN	20.5707	NaN	NaN	NaN	NaN	NaN
P82460	P82460	TXN	Sus scrofa	Thioredoxin	7	10	extracellular region,nucleus,cytoplasm	transcription, DNA-templated,regulation of transcription, DNA-templated,glycerol ether metabolic process,response to radiation,regulation of protein import into nucleus, translocation,cellular response to oxidative stress,positive regulation of DNA binding,cell redox homeostasis,oxidation-reduction process,cellular oxidant detoxification	thioredoxin-disulfide reductase activity,protein disulfide oxidoreductase activity,oxidoreductase activity, acting on a sulfur group of donors, disulfide as acceptor,protein-disulfide reductase activity	FALSE	95.5	1.44797	4.86612	1.92814e-13	2.98249e-13	17.5609	40.1987	18.2403	553.742	38.338	38.2109	35.4514	32.7221	16.5272	24.6346	37.9403	18.4382	24.7319	15.4896	35.2656	27.6169	33.7957	18.2417	17.3027	36.2636	56.1168	31.379	124.309	16.0311	16.575	18.9007	120.472	17.8043	45.5372	22.9618	67.4885	NaN	45.5455	13.7288
F1S3U9	F1S3U9	PRDX1	Sus scrofa	Peroxiredoxin-1	9	11				FALSE	94.6	1.87346	5.31796	1.77464e-17	5.98128e-17	7.87267	55.7584	15.8871	1190.6	67.5615	68.824	61.6568	52.1624	14.3415	42.6102	55.4781	NaN	10.6504	20.4633	58.1518	52.8337	61.9196	16.5543	21.0419	64.8612	70.9438	66.2634	217.066	19.1679	10.5599	30.3922	228.271	25.856	62.9156	25.457	71.4234	NaN	53.2246	20.6371
Q007T2	Q007T2	CDC42	Sus scrofa	Cell division control protein 42 homolog	2	2	storage vacuole,centrosome,cytosol,cell-cell junction,membrane,Golgi transport complex,filopodium,midbody,lamellipodium membrane,cytoplasmic ribonucleoprotein granule,neuronal cell body,dendritic spine,myelin sheath,apical part of cell,phagocytic vesicle,spindle midzone,mitotic spindle	cardiac conduction system development,keratinocyte development,phagocytosis, engulfment,actin filament organization,regulation of mitotic nuclear division,nuclear migration,integrin-mediated signaling pathway,small GTPase mediated signal transduction,positive regulation of lamellipodium assembly,positive regulation of gene expression,negative regulation of gene expression,protein ubiquitination,p…	GTPase activity,GTP binding,protein kinase binding,GTP-dependent protein binding,thioesterase binding,GBD domain binding,apolipoprotein A-I receptor binding,identical protein binding,Rho GDP-dissociation inhibitor binding,ubiquitin protein ligase activity	FALSE	41.1	0.691338	2.86792	7.99449e-13	1.23052e-12	NaN	NaN	7.78408	35.4879	11.2421	NaN	NaN	1.45538	NaN	6.43752	3.61747	NaN	NaN	8.10898	NaN	NaN	NaN	NaN	NaN	9.41227	19.1813	4.79049	15.586	NaN	NaN	NaN	11.4303	NaN	4.5983	NaN	8.04214	NaN	NaN	5.79218
Q03472	Q03472	APOR	Sus scrofa	Apolipoprotein R	8	14	extracellular region	lipid transport		FALSE	100	0.312321	8.04581	3.41121e-17	1.04506e-16	396.761	215.567	203.046	398.051	210.004	408.12	257.46	204.301	239.852	177.454	262.6	365.172	271.182	149.309	271.089	283.417	258.887	431.706	258.776	268.509	264.831	283.443	177.409	264.114	205.935	202.769	410.624	431.37	168.924	282.628	347.087	270.146	241.937	388.506
Q07717	Q07717	B2M	Sus scrofa	Beta-2-microglobulin	4	10	extracellular region,MHC class I protein complex	antigen processing and presentation of peptide antigen via MHC class I,immune response		FALSE	100	0.137944	7.16104	1.82637e-16	4.49653e-16	115.646	150.072	114.783	124.648	162.997	125.343	119.363	172.776	147.904	178.084	151.1	124.953	135.349	130.632	133.789	110.482	140.995	115.126	135.376	132.31	145.646	119.264	140.213	123.182	185.576	169.873	153.465	139.289	133.298	134.251	147.94	169.881	137.179	149.059
Q0R678	Q0R678	PARK7	Sus scrofa	protein deglycase	8	10	chromatin,mitochondrial respiratory chain complex I,mitochondrial intermembrane space,mitochondrial matrix,endoplasmic reticulum,cytosol,cell-cell adherens junction,PML body,neuron projection,cell body,perinuclear region of cytoplasm,presynapse	positive regulation of acute inflammatory response to antigenic stimulus,DNA repair,negative regulation of protein kinase activity,proteolysis,protein deglycosylation,mitochondrion organization,adult locomotory behavior,detoxification of copper ion,negative regulation of gene expression,enzyme active site formation via L-cysteine sulfinic acid,insulin secretion,negative regulation of protein bind…	transcription coactivator activity,mRNA binding,peptidase activity,superoxide dismutase copper chaperone activity,kinase binding,cytokine binding,tyrosine 3-monooxygenase activator activity,L-dopa decarboxylase activator activity,protein deglycase activity,protein homodimerization activity,small protein activating enzyme binding,ubiquitin-like protein conjugating enzyme binding,cadherin binding,m…	FALSE	84.8	0.984897	4.59482	1.98032e-10	3.59426e-10	NaN	24.3069	10.3379	260.856	29.573	29.4748	29.7391	18.7165	11.808	33.5463	22.096	13.6358	NaN	9.9922	27.8737	24.6379	30.1471	NaN	13.8744	22.7721	29.2151	20.1661	72.2123	NaN	NaN	26.0719	55.6949	7.26877	29.6235	16.5683	45.2777	14.7656	33.7927	17.2145
Q0Z8R0	Q0Z8R0	CST3	Sus scrofa	Cystatin C	4	8	extracellular space	negative regulation of cysteine-type endopeptidase activity	protease binding,cysteine-type endopeptidase inhibitor activity	FALSE	100	0.152982	6.64419	1.75959e-16	4.35135e-16	101.91	115.693	107.537	77.4223	78.5123	127.48	105.763	99.9848	108.725	114.971	94.1277	123.685	93.7819	142.571	90.04	103.021	105.767	100.344	89.0546	99.6518	95.2809	92.7328	97.4719	124.046	98.2799	121.031	93.7704	93.8324	112.035	94.7708	88.6706	101.163	92.5122	123.091
Q1KS52	Q1KS52	IGFALS	Sus scrofa	Acid-labile subunit	19	28	nucleoplasm,insulin-like growth factor ternary complex		insulin-like growth factor binding	FALSE	100	0.2367	7.34997	3.58315e-17	1.09013e-16	176.148	131.981	171.182	179.453	74.2902	129.416	175.402	248.939	194.306	148.321	169.637	117.325	193.551	145.347	174.496	177.826	165.54	202.79	217.126	165.833	173.904	178.511	173.648	148.628	184.347	209.07	169.574	139.102	92.9698	163.425	99.0637	207.548	175.158	139.028
Q1KYT0	Q1KYT0	ENO3	Sus scrofa	Beta-enolase	15	21	phosphopyruvate hydratase complex	glycolytic process	magnesium ion binding,phosphopyruvate hydratase activity	FALSE	85.7	0.575919	5.27779	3.77911e-16	8.56724e-16	28.912	67.38	NaN	90.878	73.8714	90.9082	36.5003	46.049	47.5195	56.9596	39.5102	NaN	19.502	18.3587	45.4628	NaN	47.6205	26.1963	NaN	38.1187	49.4136	41.0873	42.8234	14.7865	20.6265	39.5031	66.5347	21.1061	27.1656	17.2861	47.7848	NaN	46.9913	25.1285
Q1W2K3	Q1W2K3	PSMB10	Sus scrofa	Proteasome subunit beta	2	2				FALSE	100	0.348488	5.20607	4.77193e-13	7.33402e-13	56.5294	43.079	32.189	108.772	30.4791	56.9168	28.3803	42.6057	37.9159	37.4943	43.4925	35.3306	18.3272	28.3959	44.3089	27.1686	34.2866	48.2676	42.3394	50.3513	48.7174	47.2513	61.7012	52.1687	18.2102	18.9563	33.9508	10.0869	42.5583	26.3555	10.5834	39.6997	44.89	20.5733
Q28833	Q28833	VWF	Sus scrofa	von Willebrand factor (Fragment)	1	2	extracellular region,proteinaceous extracellular matrix,endoplasmic reticulum,extracellular matrix,Weibel-Palade body	cell adhesion,blood coagulation,hemostasis,platelet activation,cell-substrate adhesion,protein homooligomerization	protease binding,integrin binding,protein binding,collagen binding,immunoglobulin binding,protein homodimerization activity,protein N-terminus binding,chaperone binding	FALSE	99.1	0.252724	5.40368	7.11848e-13	1.09497e-12	50.1324	65.8911	49.6994	36.6561	59.7112	35.9798	46.0461	52.7284	33.0164	51.4225	24.0475	58.2118	28.0811	38.3561	51.8484	59.9155	47.4836	48.82	40.4643	56.4104	53.8997	36.6895	54.825	56.2028	44.4704	33.6271	44.7481	26.7889	57.7615	35.2129	80.1894	36.4449	37.7797	40.9373
Q28942;Q95N22	Q28942;Q95N22	FCGR3A	Sus scrofa	Low affinity immunoglobulin gamma Fc region receptor III-A;Fc gamma receptor III	1	1	plasma membrane,integral component of membrane;	;	IgG binding;	TRUE	92	0.387791	4.1438	2.45159e-14	4.02857e-14	8.68013	25.407	16.0686	14.7107	20.5185	20.4468	34.106	27.2316	21.1699	31.9239	13.636	NaN	18.2017	19.3432	21.0409	18.6894	15.7243	14.4297	NaN	8.70643	25.5717	20.2312	21.6171	13.1941	17.9585	24.5731	NaN	20.001	36.2671	24.6534	20.2327	6.11554	18.7175	19.4372
Q28944	Q28944	CTSL	Sus scrofa	Procathepsin L	7	7	extracellular space,lysosome	proteolysis involved in cellular protein catabolic process	cysteine-type endopeptidase activity	FALSE	100	0.133794	5.98017	1.53592e-15	3.03479e-15	56.0658	60.5332	50.2721	78.7038	68.1631	62.3639	64.3768	76.7826	60.4368	66.8897	54.5309	61.0294	69.566	68.3886	75.6657	61.6327	61.501	71.8468	58.5807	62.0561	76.1859	68.8353	69.077	52.2721	52.3731	64.528	71.7743	47.4041	67.227	62.114	51.9275	59.5991	61.033	68.2348
Q29041	Q29041	FCN2	Sus scrofa	Ficolin-2	2	8	extracellular region,collagen trimer	complement activation, lectin pathway	carbohydrate binding,metal ion binding	FALSE	100	0.319408	7.7703	5.00517e-13	7.69238e-13	115.773	226.739	253.598	274.658	287.388	175.413	230.671	145.54	162.512	299.953	192.764	277.164	217.825	561.424	277.84	249.861	221.9	157.093	237.763	254.378	239.345	224.797	243.25	231.946	266.761	242.386	296.612	292.609	340.797	202.855	104.759	237.811	186.333	185.772
Q29042	Q29042	FCN1	Sus scrofa	Ficolin-1	1	2	extracellular region,collagen trimer,plasma membrane	innate immune response	carbohydrate binding,metal ion binding	FALSE	69.6	1.54636	5.34894	4.0941e-10	7.61027e-10	10.8607	NaN	6.86506	9.17755	7.77587	4.04436	98.5612	503.51	445.518	7.76011	99.8982	NaN	NaN	10.1954	82.6669	3.11877	116.415	17.622	6.02261	107.962	76.5072	87.0794	NaN	11.6307	7.93389	NaN	4.72006	NaN	8.72244	7.15868	NaN	NaN	113.157	NaN
Q29052	Q29052	ITIH1	Sus scrofa	Inter-alpha-trypsin inhibitor heavy chain H1	49	121	extracellular region	negative regulation of endopeptidase activity,hyaluronan metabolic process	serine-type endopeptidase inhibitor activity	FALSE	100	0.0624161	11.6468	1.77464e-17	5.98128e-17	3449.92	3654.22	2833.82	3260.43	2581.07	3291.18	3062.6	2857.64	3233.63	2990.88	3162.87	3058.4	3153.48	3257.65	3117.12	3225.77	3183.23	3647.27	3429.2	3107.38	3160.36	3243.35	3761.98	3540.46	3315.6	3441.78	2903.75	3082.44	3071.72	3559.62	3195.47	3490.77	3139.21	3121.48
Q29095	Q29095	PTGDS	Sus scrofa	Prostaglandin-H2 D-isomerase	3	4	extracellular region,rough endoplasmic reticulum,Golgi apparatus,nuclear membrane,perinuclear region of cytoplasm	prostaglandin biosynthetic process,regulation of circadian sleep/wake cycle, sleep	prostaglandin-D synthase activity,retinoid binding,small molecule binding	FALSE	100	0.193315	5.31665	1.77464e-17	5.98128e-17	54.2495	47.6078	36.7505	43.5313	44.8887	47.3425	44.1624	38.314	39.078	42.7476	47.3619	32.1963	46.4386	23.269	42.8655	40.6999	32.3666	35.5883	31.9788	35.2418	55.235	29.1634	32.8995	49.8889	46.2961	40.18	33.6161	39.8904	38.6803	51.8868	41.4433	27.3874	30.3795	49.3598
Q29126	Q29126		Sus scrofa	Protein WAP-3	1	1	extracellular region	negative regulation of peptidase activity	peptidase inhibitor activity	FALSE	33.9	0.518222	4.17134	2.74604e-05	4.56026e-05	19.9731	NaN	22.2134	NaN	NaN	22.1564	7.56093	23.5937	36.5269	18.619	NaN	NaN	NaN	12.2677	NaN	NaN	NaN	NaN	NaN	NaN	NaN	NaN	NaN	NaN	15.4172	NaN	22.4437	NaN	NaN	NaN	NaN	10.2453	15.0322	NaN
Q29191	Q29191	PTP	Sus scrofa	Lithostathine (Fragment)	2	4	extracellular region		carbohydrate binding	FALSE	87.5	0.509842	4.72669	4.35408e-12	6.89473e-12	77.0809	21.8088	33.8534	29.6119	51.611	44.1455	22.1616	NaN	32.0906	NaN	23.2029	54.5583	21.1975	14.6998	26.2981	22.8906	27.3272	38.1729	17.5888	20.2472	34.5101	14.9921	8.20694	14.9247	18.6678	NaN	29.063	39.4593	8.23428	62.4829	43.9099	NaN	18.6041	74.1073
Q29214	Q29214	RPLP0	Sus scrofa	Large ribosomal subunit protein uL10	1	1	nucleus,cytoplasm,ribosome,intracellular ribonucleoprotein complex	ribosome biogenesis		FALSE	11.6	0.473507	4.38484	2.78278e-07	5.10722e-07	NaN	NaN	NaN	NaN	NaN	NaN	NaN	NaN	20.5042	NaN	NaN	NaN	NaN	NaN	NaN	NaN	NaN	NaN	NaN	12.2367	NaN	NaN	NaN	NaN	NaN	NaN	27.7215	NaN	NaN	NaN	NaN	NaN	30.452	NaN
Q29228	Q29228	ALDH9A1	Sus scrofa	4-trimethylaminobutyraldehyde dehydrogenase	5	5	cytoplasm	carnitine biosynthetic process,oxidation-reduction process	aldehyde dehydrogenase (NAD) activity,4-trimethylammoniobutyraldehyde dehydrogenase activity	FALSE	34.8	0.706543	3.15605	1.56208e-09	2.99589e-09	NaN	3.82081	NaN	46.9646	NaN	12.751	6.00364	6.05671	NaN	NaN	7.93229	NaN	4.16794	NaN	NaN	NaN	NaN	NaN	NaN	5.51012	NaN	NaN	9.88305	NaN	NaN	2.94681	16.1694	NaN	NaN	NaN	NaN	NaN	7.90402	NaN
Q29558	Q29558	ME1	Sus scrofa	NADP-dependent malic enzyme (Fragment)	21	28	mitochondrion,cytosol	pyruvate metabolic process,malate metabolic process,response to hormone,oxidation-reduction process	malic enzyme activity,malate dehydrogenase (decarboxylating) (NAD+) activity,malate dehydrogenase (decarboxylating) (NADP+) activity,oxaloacetate decarboxylase activity,manganese ion binding,NAD binding	FALSE	100	0.159677	6.03179	1.77464e-17	5.98128e-17	87.4442	58.1064	68.7904	62.3078	63.1251	70.0342	71.4331	64.4798	65.3327	66.2297	65.1526	82.8381	66.7233	61.6728	69.2825	80.3808	62.6723	75.5257	88.2522	55.4671	73.7894	61.7806	73.1804	58.327	64.5681	54.8452	77.9559	64.8461	61.1043	64.7918	43.7486	59.0952	64.0783	83.1417
Q29593	Q29593	TALDO1	Sus scrofa	Transaldolase	7	7	cellular_component,cytoplasm	carbohydrate metabolic process,pentose-phosphate shunt	sedoheptulose-7-phosphate:D-glyceraldehyde-3-phosphate glyceronetransferase activity	FALSE	87.5	0.676374	3.71017	2.18347e-07	4.02744e-07	10.9256	13.8083	14.8279	92.7989	20.2178	14.6586	14.507	12.764	15.0026	24.4822	7.75597	NaN	12.4657	NaN	16.3235	12.154	12.9884	12.9558	10.8936	19.518	9.5692	16.0338	32.5286	13.0549	NaN	10.7603	27.6488	10.5497	13.4153	13.7411	12.0145	NaN	10.8637	9.39443
Q2EN76	Q2EN76	NME2	Sus scrofa	Nucleoside diphosphate kinase B	6	6	ruffle,intracellular,nucleus,cytoplasm,lamellipodium,cell periphery,focal adhesion	nucleoside diphosphate phosphorylation,GTP biosynthetic process,UTP biosynthetic process,CTP biosynthetic process,integrin-mediated signaling pathway,peptidyl-histidine phosphorylation,regulation of apoptotic process,positive regulation of transcription from RNA polymerase II promoter	nucleoside diphosphate kinase activity,protein histidine kinase activity,ATP binding,metal ion binding	FALSE	52.7	0.894928	4.82774	5.81831e-07	1.05182e-06	NaN	NaN	NaN	216.645	33.8152	48.943	22.3815	32.2765	NaN	14.1529	NaN	NaN	NaN	NaN	22.2806	17.1338	22.6628	NaN	NaN	22.5131	NaN	17.0575	50.6127	NaN	NaN	NaN	69.4818	NaN	22.0016	NaN	28.9414	NaN	NaN	NaN
Q2LE37	Q2LE37	APOM	Sus scrofa	Apolipoprotein M	12	19	high-density lipoprotein particle	lipid transport		FALSE	100	0.130799	9.83302	2.5074e-16	5.94965e-16	794.742	1274.14	796.807	759.558	1013.9	855.356	934.371	930.71	715.215	1029.53	897.986	897.581	575.514	901.223	866.504	934.034	865.57	973.401	838.152	882.7	915.694	930.13	861.034	1007.25	789.539	798.928	1248.99	835.435	1086.48	872.955	799.898	838.075	876.984	930.497
Q2PYM7	Q2PYM7	PSMB9	Sus scrofa	Proteasome subunit beta	2	2	nucleus,cytosol,proteasome core complex	immune system process,proteolysis involved in cellular protein catabolic process,regulation of cysteine-type endopeptidase activity	threonine-type endopeptidase activity	FALSE	92	0.333825	4.20385	1.43266e-16	3.63182e-16	29.6969	19.1393	17.6437	23.4945	10.479	25.7895	14.6266	13.3546	22.0732	10.6692	14.3462	39.9594	30.9108	22.5258	24.7668	24.0485	6.81218	15.0743	25.2491	22.6721	28.573	21.2185	22.8079	18.9093	23.1931	16.0681	15.3366	NaN	12.9135	21.3249	15.7209	37.8218	17.7835	16.5344
Q2V6R9	Q2V6R9	MADCAM1	Sus scrofa	Mucosal addressin cell adhesion molecule 1 isoform a	1	1	integral component of membrane	cell-matrix adhesion,integrin-mediated signaling pathway,positive regulation of lymphocyte migration	integrin binding involved in cell-matrix adhesion	FALSE	36.6	0.606111	3.10822	0.00112496	0.00159182	11.8891	12.1778	NaN	8.35522	10.4046	10.1204	NaN	7.67108	NaN	5.35654	11.8023	NaN	NaN	NaN	NaN	NaN	NaN	NaN	NaN	7.3081	NaN	7.57688	18.0908	NaN	6.85298	4.25135	3.38197	NaN	36.1493	5.75036	NaN	NaN	NaN	NaN
Q2VTP6	Q2VTP6	FKBP1A	Sus scrofa	peptidylprolyl isomerase	2	3	cytoplasm	protein peptidyl-prolyl isomerization,chaperone-mediated protein folding	peptidyl-prolyl cis-trans isomerase activity,FK506 binding	FALSE	47.3	0.726358	3.93457	9.9263e-12	1.61077e-11	16.2131	12.6743	NaN	80.6165	NaN	NaN	17.8155	8.58755	NaN	15.6276	14.6869	NaN	NaN	NaN	NaN	NaN	20.0769	NaN	NaN	27.0636	NaN	15.1995	52.7721	9.27491	7.37717	NaN	20.5886	NaN	8.32653	8.51704	17.7033	9.54274	7.56588	NaN
Q45FY6	Q45FY6	HPRT1	Sus scrofa	Hypoxanthine-guanine phosphoribosyltransferase	8	8	cytoplasm,cytosol	response to amphetamine,purine nucleotide biosynthetic process,purine ribonucleoside salvage,adenine salvage,guanine salvage,grooming behavior,locomotory behavior,cytolysis,striatum development,cerebral cortex neuron differentiation,central nervous system neuron development,IMP salvage,dopamine metabolic process,hypoxanthine salvage,positive regulation of dopamine metabolic process,GMP catabolic …	nucleotide binding,magnesium ion binding,hypoxanthine phosphoribosyltransferase activity,protein homodimerization activity,guanine phosphoribosyltransferase activity	FALSE	97.3	0.817601	4.10321	1.78112e-11	2.94967e-11	10.5444	15.2021	13.0683	159.58	17.6951	18.6038	18.2199	14.4765	12.0336	13.7088	23.0903	10.7725	8.63528	12.2182	13.8979	24.4289	15.6076	12.0511	16.6438	19.4143	18.9851	12.1687	40.5155	13.7759	11.2444	16.1752	37.9935	15.6203	14.1704	15.2593	24.8082	11.7738	23.7248	9.14338
Q5U9S1	Q5U9S1	MBL1	Sus scrofa	Mannose-binding protein A	8	8	collagen trimer,extracellular space	complement activation, lectin pathway,complement activation, classical pathway	calcium ion binding,mannose binding	FALSE	94.6	0.588323	5.8225	4.11293e-14	6.61609e-14	15.5165	33.315	88.8526	138.95	79.6975	22.2059	68.3159	30.0255	20.77	27.3139	77.4901	100.701	NaN	19.2414	65.5224	77.7158	65.8279	23.5628	155.429	63.2313	78.9815	55.7627	26.3259	34.2732	116.392	135.271	137.746	19.7108	78.9254	136.341	142.172	119.708	67.3543	20.3974
Q64L94	Q64L94	PSME1	Sus scrofa	Proteasome activator complex subunit 1	5	5	proteasome complex,cytoplasm,proteasome activator complex	positive regulation of endopeptidase activity,regulation of proteasomal protein catabolic process,regulation of G1/S transition of mitotic cell cycle	endopeptidase activator activity	FALSE	69.6	1.12595	3.40541	1.79475e-06	3.17268e-06	10.6944	12.3884	NaN	127.173	13.0544	16.668	NaN	4.01774	2.65719	7.49257	6.10195	NaN	NaN	6.99514	7.48586	NaN	8.56321	NaN	NaN	10.4822	7.11713	6.73131	16.2958	6.6906	5.31111	6.32965	18.4371	NaN	9.9836	8.52839	9.65408	NaN	16.1584	9.83772
Q68RU1	Q68RU1	ApoN	Sus scrofa	Ovarian and testicular apolipoprotein N	8	20				FALSE	100	0.175192	9.41647	9.49948e-15	1.64072e-14	839.294	596.85	609.078	556.756	392.738	762.534	694.366	620.777	899.666	589.466	731.337	958.085	700.034	602.679	663.193	545.816	713.564	764.07	618.457	750.121	624.258	767.41	737.483	672.869	655.348	743.188	936.846	605.705	689.049	576.22	471.213	809.317	761.661	629.424
Q6IEA3	Q6IEA3	ISG12(a)	Sus scrofa	Interferon alpha-inducible protein 27, mitochondrial isoform 1	3	3				FALSE	99.1	0.342961	4.5013	7.40338e-14	1.16828e-13	9.42156	12.9226	19.2811	28.053	30.2697	22.0087	20.9329	23.0586	33.8644	43.1332	14.1493	29.5379	35.4781	11.4378	27.0816	42.2694	23.4817	12.4665	31.6126	22.2069	20.4992	18.2367	25.8202	11.6137	23.0901	12.1414	27.8171	23.5695	29.9072	22.411	13.7426	NaN	20.5962	15.586
Q6QAQ1	Q6QAQ1	ACTB	Sus scrofa	Actin, cytoplasmic 1	1	1	nucleus,cytoskeleton,plasma membrane,focal adhesion,actin cytoskeleton,macromolecular complex,dense body		protein binding,ATP binding	FALSE	83	0.377664	5.47396	5.65257e-06	9.76181e-06	42.1173	25.3483	24.1281	124.898	74.964	55.8824	44.7518	NaN	49.1307	37.0614	31.7059	NaN	NaN	23.7043	46.2818	17.615	48.2984	NaN	52.8865	79.6691	63.6161	59.1461	73.0195	74.805	16.3535	38.2566	67.4333	50.2679	53.7852	44.1792	44.2131	42.8651	58.5472	NaN
Q6YT39	Q6YT39	LTF	Sus scrofa	Lactotransferrin	22	27	extracellular space,cell surface,macromolecular complex,specific granule,other organism cell membrane	innate immune response in mucosa,proteolysis,antibacterial humoral response,antifungal humoral response,killing of cells of other organism,negative regulation of lipopolysaccharide-mediated signaling pathway,regulation of tumor necrosis factor production,negative regulation of ATPase activity,positive regulation of osteoblast proliferation,positive regulation of toll-like receptor 4 signaling pat…	lipopolysaccharide binding,serine-type endopeptidase activity,cysteine-type endopeptidase inhibitor activity,iron ion binding,heparin binding,protein serine/threonine kinase activator activity	FALSE	100	0.425743	6.08068	3.71494e-14	5.99903e-14	122.886	51.8922	104.772	51.3232	78.7878	57.2717	72.4606	89.0748	156.39	78.4583	64.1664	98.7905	54.696	196.866	69.1761	71.1174	74.548	90.5217	116.263	80.0034	68.4217	76.3259	32.3625	92.1296	151.505	19.4746	37.64	78.9857	80.2537	101.657	39.3805	60.392	62.0999	145.039
Q711S8	Q711S8	SPP2	Sus scrofa	Secreted phosphoprotein 24	8	10	extracellular region	bone remodeling		FALSE	100	0.116747	7.78841	6.45374e-14	1.02251e-13	210.483	203.374	219.464	139.337	211.499	223.101	243.051	233.579	201.827	232.478	227.437	184.057	258.087	226.793	210.216	208.571	228.938	234.492	225.415	206.259	227.497	201.928	233.061	191.766	228.785	182.728	238.198	175.875	205.415	229.738	195.782	281.1	221.697	214.078
Q8HZW2	Q8HZW2	MYOC	Sus scrofa	Myocilin	11	11	extracellular space,mitochondrial outer membrane,mitochondrial inner membrane,mitochondrial intermembrane space,endoplasmic reticulum,Golgi apparatus,extracellular matrix,cytoplasmic vesicle,node of Ranvier	osteoblast differentiation,negative regulation of cell-matrix adhesion,positive regulation of phosphatidylinositol 3-kinase signaling,skeletal muscle hypertrophy,myelination in peripheral nervous system,positive regulation of cell migration,neuron projection development,negative regulation of Rho protein signal transduction,non-canonical Wnt signaling pathway via JNK cascade,ERBB2-ERBB3 signaling…	fibronectin binding,frizzled binding,receptor tyrosine kinase binding,myosin light chain binding	FALSE	100	0.214264	4.95722	1.77464e-17	5.98128e-17	28.451	45.9072	35.4771	34.5164	27.6386	33.9985	37.3998	19.8338	36.0054	35.3363	34.0049	18.8183	32.6432	33.0741	34.0904	24.4199	30.8617	37.1995	35.6063	30.4457	27.8445	24.3522	32.1396	29.4285	25.7572	26.7883	38.0275	38.5089	21.5388	31.0516	26.2614	33.9228	32.2444	34.6419
Q8MHY0	Q8MHY0	MYL2	Sus scrofa	MYL2	1	1	actin cytoskeleton,cardiac myofibril	post-embryonic development,negative regulation of cell growth,muscle cell fate specification,muscle fiber development,cardiac myofibril assembly,ventricular cardiac muscle tissue morphogenesis,cardiac muscle contraction,positive regulation of the force of heart contraction	actin monomer binding,calcium ion binding	TRUE	100	0.250094	8.53541	2.48585e-10	4.54748e-10	345.83	315.646	865.794	424.803	559.338	351.261	331.395	342.732	334.518	375.735	347.252	398.426	404.966	311.388	278.821	517.972	433.694	403.743	347.953	479.432	347.036	427.631	409.171	329.587	402.295	482.529	307.789	307.981	375.318	388.364	382.762	534.03	359.978	473.6
Q95274	Q95274	TMSB4	Sus scrofa	Thymosin beta-4	2	2	nucleus,cytoplasm,cytoskeleton	actin filament organization	actin monomer binding	FALSE	92.9	1.76255	4.16962	7.06937e-17	1.96027e-16	14.1622	32.1853	8.11904	75.7334	16.8235	16.9537	24.0718	22.0488	15.8081	24.1491	16.8686	13.2006	5.32339	7.87149	17.9948	10.3107	27.6037	8.62269	17.8296	19.5446	26.031	17.9002	85.0396	9.33136	14.4689	26.3547	28.9673	NaN	15.143	19.6134	70.921	NaN	19.0914	21.7275
Q95JC8	Q95JC8	ARG1	Sus scrofa	Arginase-1	2	2	extracellular space,cytoplasm	urea cycle,arginine metabolic process,defense response to protozoan,negative regulation of activated T cell proliferation,negative regulation of interferon-gamma-mediated signaling pathway,positive regulation of neutrophil mediated killing of fungus,negative regulation of T-helper 2 cell cytokine production	arginase activity,metal ion binding	FALSE	9.8	0.561803	4.62471	0.000365574	0.000550219	NaN	NaN	NaN	51.9607	NaN	NaN	NaN	NaN	NaN	NaN	NaN	NaN	NaN	NaN	NaN	NaN	NaN	NaN	NaN	15.2232	NaN	NaN	25.0344	NaN	NaN	NaN	53.8625	NaN	NaN	NaN	NaN	NaN	NaN	NaN
Q9GJT2	Q9GJT2	ESD	Sus scrofa	S-formylglutathione hydrolase	4	4	cytoplasmic vesicle	formaldehyde catabolic process	S-formylglutathione hydrolase activity,carboxylic ester hydrolase activity	FALSE	9.8	0.672507	4.51162	8.42296e-05	0.000134863	NaN	NaN	NaN	76.9961	NaN	20.7106	NaN	NaN	NaN	NaN	NaN	NaN	NaN	NaN	NaN	NaN	NaN	NaN	NaN	NaN	NaN	NaN	NaN	NaN	NaN	NaN	27.3498	NaN	NaN	NaN	NaN	NaN	5.38826	NaN
Q9N178	Q9N178	COL10A1	Sus scrofa	Collagen type X alpha 1 chain	1	1	proteinaceous extracellular matrix,collagen trimer,cell cortex			FALSE	100	0.234547	6.6226	1.17402e-10	2.09037e-10	98.9876	182.563	99.0536	135.473	78.5799	126.502	133.188	53.1985	90.4718	57.232	74.9771	112.494	71.2271	107.042	93.5038	101.25	124.062	110.763	126.311	112.816	102.066	99.6703	65.65	138.658	101.676	86.6493	126.666	123.698	76.8314	86.4696	38.4877	119.001	123.027	113.927
Q9N1F5	Q9N1F5	GSTO1	Sus scrofa	Glutathione S-transferase omega-1	10	11	cytoplasm,cytosol	glutathione metabolic process,toxin catabolic process,L-ascorbic acid metabolic process,xenobiotic catabolic process,oxidation-reduction process,cellular response to arsenic-containing substance,cellular oxidant detoxification	glutathione transferase activity,oxidoreductase activity,glutathione dehydrogenase (ascorbate) activity,methylarsonate reductase activity	FALSE	87.5	1.38154	4.40558	2.19488e-11	3.663e-11	NaN	20.7192	27.2486	357.582	25.9645	32.5086	25.4767	19.997	NaN	19.9341	22.3197	NaN	10.2836	16.7628	25.9835	16.8874	28.2748	8.46926	11.598	22.0872	28.2004	24.0627	67.2261	15.2389	9.07415	19.1137	57.4485	10.6568	24.6094	23.7112	23.877	11.1734	19.1193	11.099
Q9TSX9	Q9TSX9	PRDX6	Sus scrofa	Peroxiredoxin-6	10	12	nucleus,cytoplasm,lysosome,perinuclear region of cytoplasm	response to oxidative stress,cell redox homeostasis,glycerophospholipid catabolic process,positive regulation of mRNA splicing, via spliceosome,oxidation-reduction process,cellular oxidant detoxification	glutathione peroxidase activity,ubiquitin protein ligase binding,protein homodimerization activity,cadherin binding,calcium-independent phospholipase A2 activity,peroxiredoxin activity,Requires Ontology	FALSE	67.9	1.28838	4.22552	2.42291e-10	4.42849e-10	NaN	13.5943	NaN	257.226	19.8023	22.9799	22.7099	14.7047	7.21438	13.2327	19.0043	NaN	NaN	NaN	15.8143	NaN	16.7489	NaN	NaN	14.8611	17.4737	13.8539	57.3392	NaN	7.02568	NaN	58.4617	NaN	17.8421	NaN	24.406	NaN	13.1489	NaN
Q9TUQ3	Q9TUQ3	C7	Sus scrofa	Complement component C7	4	5	extracellular region,membrane attack complex	complement activation, alternative pathway,complement activation, classical pathway,cytolysis		FALSE	100	0.190277	8.55462	4.25735e-12	6.73762e-12	360.206	452.326	334.428	352.7	333.06	342.58	351.655	365.995	171.684	524.226	340.385	440.026	342.834	394.708	324.829	278.228	337.043	354.153	486.682	382.191	405.087	355.332	444.317	427.031	571.057	511.51	426.16	416.659	396.545	375.038	551.047	321.593	314.646	713.212
P14632	P14632	LTF	Sus scrofa	Lactotransferrin	1	2				FALSE	100	0.276563	5.28844	1.77464e-17	5.98128e-17	71.6122	36.8154	52.465	56.7604	26.6656	56.9574	31.9155	32.1048	35.0421	64.2517	46.6571	42.1739	38.1375	62.3084	35.8051	34.7743	45.9122	49.2818	48.6264	27.8555	53.2802	35.9187	48.3975	37.4127	47.3544	42.3541	36.4159	51.7121	34.5665	51.9488	60.7312	35.6061	43.4479	39.8286
[truncated: 78 more columns]

## Sheet: S3A
S3A.Paired limma analysis comparing 1, 5, and 12 DPI to pre-infection serum proteomes in PRCV and pH1N1 infected pigs
Protein	Gene	pH1N1 D1			pH1N1 D5			pH1N1 D12			PRCV D1			PRCV D5			PRCV D12
		logFC	p-value	Adj p-value	logFC	p-value	Adj p-value	logFC	p-value	Adj p-value	logFC	p-value	Adj p-value	logFC	p-value	Adj p-value	logFC	p-value	Adj p-value
A0A075B7H9		0.0426603	0.811379	0.949706	0.0885816	0.620816	0.83052	0.392594	0.0349111	0.111522	0.0790467	0.562044	0.829511	0.03254	0.810884	0.895032	0.274047	0.0514857	0.176403
A0A075B7I5		-0.0925683	0.458455	0.860773	0.170974	0.17592	0.43507	0.549605	0.000119985	0.00134618	-0.0306702	0.791846	0.939166	0.0747835	0.52119	0.759448	0.432048	0.000810583	0.0137799
A0A075B7I6		-0.0785648	0.525073	0.889754	-0.0627727	0.611126	0.829368	0.326215	0.012416	0.0502106	0.0537249	0.707774	0.904852	-0.171467	0.236918	0.50345	0.330748	0.0271582	0.122608
A0A075B7I9		0.0125003	0.933946	0.975426	0.163352	0.283766	0.562639	0.664145	0.000126784	0.00135629	0.139758	0.539259	0.813321	0.12307	0.58848	0.789802	0.696785	0.00439191	0.0445645
A0A075B7J0		-0.18239	0.419872	0.828931	0.359174	0.118127	0.355152	0.377079	0.101631	0.233751	0.140461	0.558541	0.828014	0.0640785	0.789054	0.885515	0.697152	0.00653277	0.0538224
A0A0A0MY58;P01846		-0.0492713	0.647489	0.938825	0.102803	0.34309	0.621345	0.45182	0.000220909	0.00195419	0.0521669	0.527014	0.813321	-0.036748	0.655297	0.847271	0.366115	0.000109968	0.00388273
A0A0H5ANC0	OGN	-0.134962	0.257649	0.665836	-0.00259134	0.982457	0.998904	0.223779	0.0656361	0.173521	0.141329	0.146783	0.487542	0.103281	0.284745	0.570734	0.0627701	0.512861	0.670665
A0A286ZFW3	APOH	0.0131034	0.801092	0.949706	0.0304169	0.55966	0.804511	-0.013293	0.798278	0.887123	-0.0403567	0.523265	0.813321	-0.0347934	0.581739	0.789565	-0.0907438	0.157195	0.341954
A0A286ZHV7	HSPG2	-0.111801	0.323339	0.751192	-0.246101	0.0352183	0.1604	0.165397	0.148111	0.297515	-0.0766329	0.406922	0.737359	-0.0611633	0.507073	0.745982	-0.271614	0.00583899	0.0518529
A0A286ZI36	PKM	1.07989	0.000142186	0.00934365	0.581401	0.0249407	0.12205	1.02453	0.000262048	0.00227438	1.33122	2.44819e-07	1.60532e-05	0.91375	7.45597e-05	0.00162966	0.987815	2.66864e-05	0.00188917
A0A286ZIL9	COL18A1	0.152358	0.22562	0.621469	0.0161852	0.896223	0.969136	0.403261	0.00278252	0.015802	0.119785	0.450534	0.774514	0.269986	0.0955917	0.26754	-0.187194	0.241777	0.456691
A0A286ZIM1;A0A8W4FDG3		0.0348855	0.751631	0.938825	-0.0115414	0.916542	0.975947	0.185291	0.100668	0.233751	-0.0811366	0.347439	0.690365	-0.00751065	0.93014	0.95511	0.135623	0.121407	0.302859
A0A286ZJL9		-0.0363296	0.890237	0.960971	0.147324	0.57674	0.820677	0.0170156	0.948456	0.965243	0.0643987	0.759174	0.926712	0.0254194	0.903616	0.944783	0.0244954	0.907103	0.939003
A0A286ZMU4;A0A8W4FLJ3		-0.0846336	0.55267	0.901519	0.0163558	0.908365	0.971739	0.363683	0.015325	0.0592395	0.0670151	0.634391	0.865202	-0.0236051	0.866734	0.923842	0.207778	0.147217	0.328741
A0A286ZMW3	HGFAC	-0.0727006	0.247286	0.651129	-0.0481528	0.440398	0.710818	-0.0213505	0.73117	0.83667	-0.056798	0.250686	0.61532	-0.1275	0.0136181	0.0659349	-0.0729712	0.143014	0.323367
A0A286ZN52	PSMB3	-0.0553128	0.768115	0.944741	0.182701	0.33384	0.619219	0.165705	0.380045	0.544613	0.378554	0.0506936	0.24118	0.354083	0.0664507	0.207489	0.0362826	0.846261	0.900524
A0A286ZPA0	LOC100520329	-0.895757	0.3953	0.798441	0.395575	0.594179	0.827086	0.603812	0.386183	0.547908	-0.0431548	0.956226	0.988664	-0.300282	0.681833	0.862152	-0.35485	0.62829	0.758981
A0A286ZPG0	APOC4	0.133655	0.387637	0.79458	0.193215	0.21501	0.492063	0.527345	0.0017374	0.010656	0.587581	0.00217914	0.0196123	0.742089	0.000207214	0.00339682	0.777475	0.000119335	0.00390933
A0A286ZQ85	COL3A1	-0.165943	0.250543	0.651129	-0.0720111	0.61462	0.83052	-0.0761583	0.594489	0.743112	0.144723	0.272132	0.634055	-0.00670747	0.958962	0.973813	0.137062	0.297787	0.498847
A0A286ZQJ9	LOC110258310	-0.00433762	0.933152	0.975426	0.00596921	0.908109	0.971739	0.0648246	0.21634	0.378695	-0.0755707	0.250072	0.61532	0.0191972	0.767625	0.88279	0.0644519	0.325054	0.517737
A0A286ZSJ7	C1QC	-0.132691	0.0851094	0.353216	-0.1895	0.0165639	0.0885976	-0.083399	0.271444	0.439662	-0.201928	0.00275727	0.023879	-0.18002	0.00672616	0.0460792	-0.01832	0.768013	0.847399
A0A286ZSX6		0.061691	0.663643	0.938825	0.112698	0.42876	0.704391	0.34898	0.0191366	0.0727508	-0.0603229	0.67047	0.889439	0.0391229	0.782375	0.88279	0.140151	0.326305	0.517737
A0A286ZTX3	BTD	-0.0275477	0.730819	0.938825	-0.0181236	0.82083	0.928615	0.0249475	0.755327	0.855789	0.0929323	0.3809	0.713449	-0.0872821	0.410147	0.66758	-0.112916	0.288602	0.496135
A0A286ZUH0	CALD1	0.00466941	0.98919	0.991346	0.481979	0.166884	0.424934	0.952494	0.0103152	0.0435322	-0.302701	0.339442	0.680366	0.79614	0.00784488	0.0480107	0.319814	0.408592	0.586074
A0A286ZUL8		-0.0738397	0.594445	0.9176	-0.156474	0.263424	0.552384	0.0104893	0.939561	0.960367	-0.132372	0.226371	0.583733	-0.012151	0.910407	0.945423	-0.0335798	0.756005	0.842248
A0A286ZUT9	ADAMDEC1	0.203712	0.20349	0.581446	0.00555601	0.971922	0.998904	0.140334	0.377368	0.542466	0.00349347	0.986393	0.992832	-0.185505	0.36864	0.643369	-0.355617	0.0907717	0.243425
A0A286ZUY9	A1BG	0.104409	0.367935	0.779954	0.126559	0.276748	0.560583	0.121887	0.294498	0.462352	0.00367875	0.974987	0.988664	0.233874	0.0540159	0.177095	-0.0849918	0.470912	0.636735
A0A286ZVG7	COL6A3	-0.009656	0.893078	0.960971	-0.224567	0.00381962	0.0283391	-0.000509505	0.99434	0.99571	-0.0431549	0.591071	0.846034	-0.0924566	0.254061	0.527666	-0.125331	0.125682	0.308492
A0A286ZVJ2	RAP1B	0.322465	0.2497	0.651129	1.00902	0.000988814	0.010578	1.02486	0.000848982	0.00610206	0.360352	0.320705	0.672163	0.780756	0.0374191	0.137403	-0.390997	0.32711	0.517737
A0A286ZVK1	F11	-0.0892708	0.138612	0.468833	0.0667233	0.264184	0.552384	0.0880749	0.14377	0.293835	0.08075	0.292566	0.656528	0.0950978	0.216902	0.476354	0.0804505	0.294324	0.498847
A0A286ZVT6	NUCB1	0.255937	0.118931	0.424096	0.194059	0.237266	0.529816	0.240543	0.14175	0.29156	0.680858	0.00166099	0.0154715	0.395402	0.0529433	0.174827	0.40339	0.0486239	0.172157
A0A286ZWK2	HSPA8	0.215546	0.274534	0.693877	0.661063	0.00194911	0.0169168	0.749225	0.000588499	0.00451182	1.31417	0.00018217	0.00225989	1.26596	0.000279367	0.00427431	0.306178	0.32392	0.517737
A0A286ZWQ1	LTBP1	-0.216145	0.391049	0.79594	-0.156123	0.497334	0.767697	-0.740449	0.00145275	0.00928147	-0.524946	0.00663744	0.0507764	-0.46938	0.00746944	0.0480107	-0.577317	0.00142498	0.0218022
A0A286ZYZ5	LOC106504547	-0.116701	0.567358	0.911355	-0.1718	0.401413	0.686747	-0.577688	0.00782073	0.0356192	-0.152113	0.408139	0.737359	-0.0726073	0.691571	0.863973	-0.220564	0.233502	0.448441
A0A287A042	MGAM	0.097137	0.380555	0.788606	0.170341	0.129435	0.376836	0.55522	2.15382e-05	0.000403067	0.131351	0.223616	0.583733	0.211521	0.0548128	0.178433	0.400201	0.000732055	0.0129236
A0A287A0E9	CLCA1	-0.0469693	0.72648	0.938825	0.0457497	0.809414	0.92324	0.031046	0.818518	0.902921	-0.165745	0.447046	0.771407	-0.08646	0.694566	0.863973	0.127612	0.524927	0.678708
A0A287A0M2	ARSG	-0.0521029	0.649346	0.938825	-0.0493124	0.666902	0.851554	0.148201	0.201742	0.363927	0.0459251	0.774443	0.932991	-0.0311775	0.845689	0.912561	0.0589024	0.713344	0.824588
A0A287A1S6	COL1A1	-0.467248	0.00484073	0.0674769	-0.140278	0.366122	0.647203	-0.375793	0.0202817	0.0764722	-0.222619	0.0327146	0.178775	0.083274	0.407756	0.666907	-0.109916	0.276701	0.488483
A0A287A1Z0	PSMB8	-0.0413494	0.807483	0.949706	-0.698975	0.00198938	0.0169466	-0.335588	0.0760176	0.192132	0.159343	0.462894	0.775431	-0.108569	0.582719	0.789565	-1.08212	0.000127756	0.00390933
A0A287A6K7	APMAP	-0.00477715	0.960362	0.983384	0.0288704	0.764089	0.898584	0.192495	0.0529759	0.149855	-0.0828789	0.319772	0.672163	-0.0159393	0.846952	0.912561	0.0813311	0.328734	0.518519
A0A287A6P1	GSN	0.00468286	0.909544	0.964033	0.0350007	0.398781	0.686747	0.0121971	0.767443	0.86738	-0.0349735	0.541549	0.813321	-0.0118288	0.835937	0.904941	0.088887	0.127471	0.309573
A0A287A6Q0	PROS1	-0.0707072	0.145118	0.476816	-0.0711941	0.142472	0.390101	0.0817827	0.0939957	0.224031	-0.0809382	0.0615824	0.271792	-0.0235311	0.575797	0.788928	0.0513636	0.226798	0.442883
A0A287A718	CP	0.0571926	0.313974	0.739115	0.0306205	0.587381	0.827086	-0.0138571	0.805615	0.89297	-0.0012465	0.982036	0.992832	0.0535395	0.337508	0.616388	0.0341796	0.53835	0.685319
A0A287AA42		-0.0394425	0.78708	0.949706	-0.0217217	0.881695	0.963214	0.193442	0.191835	0.352997	-0.0585199	0.692941	0.90154	-0.0831335	0.57538	0.788928	0.35187	0.0233451	0.112794
A0A287AAI1	CLEC11A	-0.104259	0.294386	0.716494	-0.167161	0.0977132	0.318781	0.0348124	0.723914	0.8364	0.0516544	0.602378	0.851396	-0.150704	0.135418	0.337809	-0.193722	0.0580537	0.188983
A0A287AAZ9	CFB	0.0295442	0.541856	0.896597	0.0681178	0.165536	0.424934	0.001456	0.975936	0.980293	-0.0681665	0.158211	0.500454	0.00586672	0.901589	0.944783	0.0449091	0.347662	0.530155
A0A287AB52	MFAP4	-0.0791221	0.612821	0.921234	-0.207177	0.191	0.452887	-0.326355	0.043838	0.132668	-0.198786	0.108341	0.407263	-0.0740716	0.54153	0.770329	-0.0489171	0.686254	0.801503
A0A287ABN4	TNIP1	0.145008	0.489487	0.889754	-0.150719	0.405332	0.687111	0.363824	0.0745725	0.189816	0.108549	0.640748	0.865585	-0.578113	0.0294118	0.116275	-0.300071	0.207459	0.412223
A0A287ADE7;A0A287AWH3;A0A287B1Y4		0.129264	0.534022	0.895083	0.0704068	0.734191	0.896483	0.94157	8.58379e-05	0.00112816	0.0523786	0.814473	0.94699	-0.194836	0.385741	0.654268	1.15903	1.4325e-05	0.00159334
A0A287ADL4	PIGR	-0.287564	0.0114643	0.12483	-0.0203767	0.849325	0.949901	-0.0529568	0.622147	0.765207	0.121479	0.269558	0.631261	-0.114194	0.298717	0.58098	-0.126166	0.251919	0.468141
A0A287AE51		-0.429808	0.0421834	0.255321	-0.385203	0.0666822	0.24539	0.440838	0.0375252	0.11823	-0.0888497	0.712458	0.905867	-0.194773	0.421283	0.673336	0.675857	0.00847138	0.059821
A0A287AFE3	LOC110258312	-0.0928212	0.147076	0.479822	-0.0579652	0.359679	0.638812	0.0706209	0.266168	0.435721	-0.0953929	0.173801	0.501759	0.0221908	0.747855	0.88279	0.0697176	0.31647	0.515106
A0A287AFQ4	C8G	0.0534071	0.514667	0.889754	0.0121987	0.881259	0.963214	0.0291682	0.721222	0.8364	-0.030162	0.628015	0.860475	0.202773	0.0026842	0.0232462	0.0688382	0.273021	0.483848
A0A287AG13	APOB	-0.0119363	0.842902	0.959744	0.0383062	0.52613	0.785779	-0.0327041	0.587992	0.739007	0.0262766	0.73015	0.908235	0.161642	0.0409315	0.14564	-0.192029	0.0166821	0.0882891
A0A287AHI7	ADIPOQ	0.0561389	0.513945	0.889754	0.149145	0.0899579	0.305448	0.328355	0.000599859	0.00452353	0.0408052	0.673435	0.890798	0.163	0.0999677	0.27151	0.181969	0.0678733	0.207764
A0A287AHK1	GC	0.0177785	0.718641	0.938825	0.0222383	0.652455	0.84306	-0.0236609	0.631905	0.773075	-0.0442117	0.290317	0.656432	-0.0138227	0.738648	0.88279	-0.114117	0.00956072	0.0654877
A0A287AI92	CA1	1.42765	0.00350117	0.0593752	2.58086	3.73979e-06	0.000207921	2.6516	2.88359e-06	8.84301e-05	3.45524	1.18838e-05	0.000287089	3.30421	2.24028e-05	0.000695474	1.58157	0.0217321	0.107258
A0A287AIJ3	GPX3	0.0609311	0.379501	0.788606	0.0539285	0.435987	0.710818	0.116685	0.0983273	0.229666	-0.0781791	0.326736	0.673572	-0.00502175	0.949332	0.966172	0.04525	0.568049	0.70494
A0A287AIM8	C5	0.102656	0.0439824	0.262752	0.098721	0.0521154	0.209566	0.101412	0.0464231	0.137947	0.0146326	0.819174	0.94699	0.215995	0.00200907	0.0180816	0.148396	0.0266215	0.122193
A0A287AJ51	AGT	0.155102	0.0637192	0.314068	0.0101961	0.899916	0.969465	-0.0231629	0.775231	0.869772	0.179098	0.0509683	0.24118	-0.0309498	0.727182	0.879087	-0.0335096	0.705683	0.822023
A0A287AJQ2	PGAM1	0.144505	0.20007	0.581446	-0.0835752	0.454206	0.725467	0.137206	0.223081	0.384765	0.154703	0.167613	0.500454	0.0267096	0.808559	0.895032	-0.190685	0.0917483	0.243425
A0A287AJS8;A0A8W4F753;A0A8W4FKP8;F1RTG6	SLA-6	0.164647	0.474122	0.873241	-0.327695	0.15981	0.417685	-0.0850476	0.71064	0.831058	0.0955495	0.621567	0.859334	0.119946	0.568542	0.787544	-0.243396	0.251844	0.468141
A0A287AJU1	COTL1	0.643151	0.0116145	0.12483	1.27518	1.13427e-05	0.000375792	1.06708	0.000134687	0.0013768	-0.315901	0.294809	0.656881	0.954628	0.0070655	0.047001	-0.0745408	0.836082	0.894549
A0A287AK21	TAGLN2	0.565926	0.0312384	0.214473	0.82268	0.00266117	0.0214761	1.26142	2.3846e-05	0.00042189	-0.0117132	0.962685	0.988664	0.788072	0.00361815	0.0284613	-0.374976	0.141947	0.323367
A0A287AKL0;F1S9C0;P0DSO0	SAA2	1.3119	1.70095e-05	0.00195609	0.695206	0.00794325	0.0514633	0.422582	0.0819708	0.201226	0.519265	0.166946	0.500454	1.15262	0.00387106	0.0291188	1.22129	0.0095291	0.0654877
A0A287AKW2		0.0298261	0.915275	0.967737	0.0450951	0.872228	0.959869	-0.218375	0.438477	0.598514	0.152445	0.446729	0.771407	-0.0268445	0.892873	0.942135	-0.232015	0.250061	0.468141
A0A287AL89	FBLN1	-0.0449872	0.501237	0.889754	-0.01994	0.764879	0.898584	-0.0936018	0.16732	0.324756	-0.00426136	0.960322	0.988664	0.028244	0.741836	0.88279	0.0212303	0.804348	0.870435
A0A287AL92	C4BPB	-0.0376684	0.514244	0.889754	0.0382254	0.508092	0.771361	0.167421	0.00657266	0.0305396	-0.0370398	0.604466	0.851396	0.0611754	0.394233	0.658166	0.158377	0.0331998	0.137286
A0A287ALC1	IGHM	-0.0184614	0.877371	0.960971	0.0192847	0.87195	0.959869	0.25372	0.0411997	0.126346	0.093725	0.374685	0.713449	0.101189	0.338409	0.616388	0.140504	0.187073	0.387781
A0A287ALJ6		-0.215407	0.581812	0.911355	0.193234	0.621084	0.83052	0.354214	0.36735	0.53604	-0.208448	0.608328	0.851396	-0.285426	0.483765	0.718602	0.520479	0.206194	0.411491
A0A287ANU5		-0.124313	0.883393	0.960971	-0.476532	0.604432	0.829368	-0.586744	0.576987	0.727162	-0.129042	0.875733	0.958184	0.666857	0.417523	0.671498	1.05289	0.334113	0.520429
A0A287ANV7	LCP1	0.0390764	0.582186	0.911355	-0.263208	0.000819148	0.00897163	-0.193611	0.0101256	0.0431275	0.0582263	0.38548	0.713449	-0.202733	0.00472436	0.0338825	-0.125225	0.0683104	0.207764
A0A287ANX9		-0.0177053	0.872093	0.960971	-0.0717858	0.515419	0.779136	0.045757	0.677754	0.805599	0.0416512	0.722662	0.908235	-0.106652	0.366479	0.643369	-0.0512808	0.66233	0.785554
A0A287AP28		-0.00215856	0.988625	0.991346	-0.365825	0.0213734	0.108042	-0.273656	0.0788862	0.195095	0.115093	0.413752	0.738957	-0.0460953	0.742153	0.88279	0.119849	0.394966	0.577355
A0A287AP71	EFEMP1	0.0311561	0.686389	0.938825	-0.0392607	0.611208	0.829368	-0.147318	0.0639104	0.170923	0.169836	0.0209121	0.126298	-0.0977958	0.169738	0.397498	-0.0380217	0.588074	0.723662
A0A287AP73	ITIH3	0.0243605	0.844355	0.959744	0.121321	0.332163	0.619219	-0.238951	0.0620449	0.167886	0.0550401	0.729878	0.908235	0.135692	0.397194	0.658166	-0.177635	0.269898	0.483848
A0A287APG4		-0.0861373	0.832294	0.959537	0.248265	0.542833	0.79977	0.190137	0.640714	0.779705	-0.12746	0.682385	0.893756	-0.283123	0.366198	0.643369	0.327831	0.296618	0.498847
A0A287APV2	MYO18A	0.00508013	0.964097	0.983384	-0.0304692	0.787313	0.911989	-0.31911	0.00805569	0.0363296	-0.0242559	0.79103	0.939166	-0.0388099	0.671901	0.853125	-0.143976	0.123535	0.306501
A0A287AQ20	CFI	0.017238	0.698442	0.938825	0.105482	0.023541	0.11644	0.0853191	0.0628463	0.16906	0.00592916	0.905869	0.971481	0.0617714	0.224115	0.489851	0.0771788	0.131595	0.316243
A0A287AR98	SBSN	0.167642	0.367062	0.779954	-0.143077	0.445072	0.713356	-0.297765	0.114829	0.252733	-0.382439	0.195865	0.535131	-0.768405	0.0127127	0.0653041	0.178847	0.540492	0.685319
A0A287AT18	PSMA7	0.00841871	0.941605	0.975426	-0.0918384	0.426861	0.704097	0.0725431	0.529362	0.68982	0.164277	0.358736	0.70407	-0.0216841	0.902853	0.944783	-0.00932719	0.958124	0.978846
A0A287AT36	C8B	0.0942077	0.229434	0.626074	0.0414198	0.593337	0.827086	-0.0286146	0.71182	0.831058	-0.0710997	0.238599	0.598453	0.163176	0.00999082	0.0561417	0.0795078	0.188913	0.388838
A0A287AT48	LOC100153899	-0.0447093	0.808521	0.949706	-0.344543	0.0698133	0.252867	-0.744147	0.000346542	0.0028466	-0.337426	0.0502374	0.24118	-0.133534	0.424916	0.674186	-0.370971	0.0325254	0.136887
A0A287ATE3		-0.527196	0.113767	0.413339	-0.00860389	0.980687	0.998904	0.0539549	0.867292	0.934319	0.352179	0.285757	0.65255	-0.317515	0.334667	0.614449	-0.198661	0.543465	0.687192
A0A287ATF0	COLEC10	-0.0160569	0.894036	0.960971	-0.140509	0.254342	0.541653	-0.234126	0.0603213	0.165165	-0.132742	0.231557	0.587209	-0.0666487	0.544162	0.770897	0.0745106	0.498079	0.658842
A0A287AU93		-0.0267295	0.895757	0.960971	-0.148719	0.468066	0.739898	-0.0192361	0.924872	0.956051	0.0474422	0.842286	0.94699	-0.112368	0.638007	0.834316	-0.0377551	0.87417	0.911918
A0A287AUR4		-0.0382737	0.89036	0.960971	-0.0858158	0.757424	0.898584	0.0425738	0.878138	0.941041	0.163473	0.535092	0.813321	-0.0465374	0.859398	0.921424	0.0363439	0.88996	0.926285
A0A287AW67	LGMN	-0.0353635	0.722095	0.938825	0.149174	0.140863	0.388005	-0.0446767	0.653418	0.788904	0.017941	0.865508	0.954972	-0.0332927	0.753452	0.88279	0.16892	0.118756	0.2995
A0A287AW81	FLNA	0.147438	0.581813	0.911355	1.1083	0.000299016	0.00429835	0.58805	0.0347515	0.111522	0.0550021	0.767696	0.929743	0.727267	0.000488261	0.00622533	-0.161204	0.389445	0.571103
A0A287AWR7	PON1	0.0713985	0.693486	0.938825	0.0551413	0.760701	0.898584	0.238354	0.194443	0.355842	-0.0680456	0.706532	0.904852	-0.134815	0.457363	0.701186	0.263632	0.151709	0.333178
A0A287AX98;O97507	F12	0.0670291	0.20477	0.581446	0.0884705	0.0976494	0.318781	0.0291436	0.576911	0.727162	0.0445219	0.379474	0.713449	-0.0434227	0.391191	0.657717	0.0298295	0.554449	0.697239
A0A287AXI5	IFI6	-0.10823	0.611698	0.921234	-0.527653	0.0184241	0.0963079	-0.469898	0.0340151	0.110971	-0.153036	0.364276	0.70407	0.174377	0.302307	0.582286	-0.496429	0.00573417	0.0518529
A0A287AYC4;A0A5G2NLY0		0.158074	0.450515	0.856004	0.229314	0.276374	0.560583	0.501513	0.021865	0.0804633	-0.0351151	0.885395	0.958184	0.370006	0.168787	0.397298	0.709021	0.00682189	0.0546057
A0A287AYJ8	SERPINF1	0.124251	0.0354622	0.22346	0.0214129	0.7062	0.875612	-0.0569204	0.320041	0.489099	-0.0122024	0.836116	0.94699	0.020612	0.726954	0.879087	-0.0153557	0.794661	0.862292
A0A287AZA7;A0A2C9F3G2;A7U5U2;F1S911;P0CG68;P63053;RS27A	UBC;UBB;UBA52;UBC;UBA52;	0.509815	0.0490151	0.278357	1.47713	2.0239e-06	0.000155166	1.34587	8.50738e-06	0.000217411	1.6722	0.000127264	0.00196136	1.61051	0.000198568	0.00337565	0.682798	0.0804502	0.229873
A0A287B088	PSMB4	-0.0724563	0.683698	0.938825	-0.0554555	0.755024	0.898584	0.190136	0.289206	0.460329	0.209896	0.330275	0.673572	-0.239621	0.267609	0.54836	0.206532	0.337954	0.522195
A0A287B1U6	NELL2	-0.0949673	0.349132	0.767478	-0.110058	0.279187	0.560583	-0.118562	0.244503	0.408986	0.0581904	0.543135	0.813321	-0.0844702	0.37915	0.650893	-0.33516	0.00139974	0.0218022
A0A287B3S3	ITIH1	-0.0514011	0.453863	0.856004	0.00490868	0.942691	0.991402	-0.102453	0.14124	0.29156	-0.00733832	0.888659	0.958184	0.0968316	0.0728005	0.222998	0.148535	0.00792401	0.0586632
A0A287B4X5	SENP6	0.0388528	0.858532	0.960971	-0.0310621	0.896922	0.969136	-0.321776	0.148016	0.297515	0.000620312	0.997484	0.997484	-0.119282	0.540035	0.770329	0.533105	0.00589221	0.0518529
A0A287B5G0		-0.164218	0.581039	0.911355	0.155772	0.600537	0.827086	-0.1254	0.673097	0.802136	0.0634838	0.846883	0.94699	-0.434213	0.193269	0.439759	0.328267	0.322194	0.517737
A0A287B5T6;A0A8W4F8A7	ARF3;ARF1	-0.0083516	0.971938	0.986957	1.04106	0.00012601	0.00222941	0.994737	0.000214561	0.00193525	0.743831	0.0274873	0.153862	1.01431	0.00365757	0.0284613	-0.0187176	0.953743	0.977524
A0A287B5W2;P00761;TRYP	TRYP	0.0348741	0.585158	0.911355	-0.0532439	0.406291	0.687111	0.0769967	0.232908	0.392445	0.0599171	0.363046	0.70407	-0.0425121	0.517142	0.75595	-0.0213788	0.743914	0.841254
A0A287B5Y6	LBP	0.589306	0.000115778	0.00887634	0.28081	0.0418127	0.178091	-0.19736	0.145001	0.293835	0.0467651	0.824855	0.94699	0.534505	0.0164074	0.0760706	0.175889	0.407919	0.586074
A0A287B6S5	ENO1	0.491751	0.0327815	0.218544	0.640606	0.00730136	0.0479803	0.981703	0.000119104	0.00134618	1.25579	0.000349046	0.00390761	0.969371	0.00389836	0.0291188	0.353614	0.263059	0.482976
A0A287B762	ENPP2	-0.190243	0.0583786	0.308668	-0.067831	0.487456	0.754982	-0.340743	0.00143997	0.00928147	-0.117161	0.250512	0.61532	-0.0745939	0.461236	0.701186	-0.227912	0.0302481	0.132228
A0A287B863	ACAN	-0.237532	0.093013	0.365692	-0.341205	0.0186338	0.0963096	-0.170634	0.221912	0.384765	-0.0561782	0.60611	0.851396	-0.0590001	0.588231	0.789802	-0.372888	0.00174176	0.0241359
A0A287B9B3	SERPINF2	-0.0311502	0.428101	0.837984	-0.0555432	0.1627	0.422836	-0.172352	0.000124783	0.00135629	-0.0354383	0.440145	0.766055	-0.0774224	0.0981707	0.268216	-0.105437	0.0272462	0.122608
A0A287B9B9	IL1RAP	-0.0522267	0.701597	0.938825	-0.0232468	0.864432	0.958166	0.118828	0.385933	0.547908	0.043378	0.641174	0.865585	-0.0205296	0.825163	0.897511	0.090222	0.33549	0.520429
A0A287BAB3		-0.254911	0.0753672	0.327065	-0.00145518	0.991663	0.998904	0.281584	0.0508772	0.146272	0.0236681	0.860454	0.951683	-0.110858	0.412992	0.669835	0.0492067	0.715003	0.824588
A0A287BAB9	KLK10	0.0707768	0.767244	0.944741	0.172517	0.466982	0.739898	0.713966	0.00496893	0.0245226	-0.0697912	0.709688	0.904852	0.161968	0.390195	0.657717	0.756639	0.000341406	0.00712298
A0A287BAK1	TLN1	0.784373	0.0227838	0.169041	1.25429	0.000621693	0.00752576	1.23399	0.000733715	0.00544369	0.0423049	0.891383	0.958184	0.882077	0.00780249	0.0480107	-0.554429	0.10774	0.279394
A0A287BAM0;Q29243	DAG1	-0.138562	0.217961	0.607648	-0.305914	0.00954917	0.0601729	0.0160078	0.885279	0.942659	-0.346463	0.00254158	0.0224343	-0.0500559	0.661553	0.850568	-0.14081	0.187554	0.387781
A0A287BAY9	ALB	0.132169	0.206959	0.584055	-0.114704	0.271739	0.558036	0.069632	0.501705	0.662659	-0.0633106	0.591671	0.846034	-0.0901359	0.446254	0.687351	-0.0352412	0.764842	0.847399
A0A287BAZ6	PRDX2	1.32968	0.00382731	0.0607091	2.40505	4.06802e-06	0.000207921	2.86071	2.27655e-07	2.61804e-05	3.29746	7.07701e-06	0.000216557	3.45387	3.48559e-06	0.000266648	1.52482	0.0167816	0.0882891
A0A287BBW6		0.0186353	0.941674	0.975426	-0.39158	0.132355	0.38052	-0.0261751	0.924179	0.956051	-0.0934061	0.398933	0.732441	-0.114851	0.30122	0.582286	0.190507	0.0915806	0.243425
A0A287BCT9	EXTL2	-0.0832935	0.162499	0.513368	-0.110326	0.0677634	0.24739	-0.137185	0.0253255	0.0882556	-0.0567214	0.280396	0.650009	-0.148943	0.00735467	0.0480107	-0.170254	0.00261448	0.0315801
A0A287BD18	CFH	0.0135777	0.793589	0.949706	-0.00679281	0.895804	0.969136	0.0699522	0.184378	0.344479	-0.0523699	0.264889	0.631261	0.0370738	0.427376	0.674186	0.0704397	0.137176	0.32291
A0A287BDE8	AHSG	0.213488	0.152578	0.490524	-0.123257	0.40309	0.686747	-0.0838914	0.567992	0.721758	-0.011453	0.934439	0.988266	-0.141097	0.315263	0.595497	-0.0479225	0.730957	0.836681
A0A287BDI2;I3LP35		-0.547765	0.0178065	0.146802	-0.282122	0.239145	0.531433	-0.611895	0.00890861	0.0394035	-0.708604	0.00720036	0.0539337	-1.04658	5.4528e-05	0.00131728	-0.594941	0.00610034	0.0518529
A0A287BDV3		0.0810848	0.7296	0.938825	0.0868574	0.711228	0.876883	-0.135474	0.564345	0.72096	0.177409	0.512983	0.813321	-0.115468	0.669566	0.853125	1.09233	0.000339015	0.00712298
A0A287BEY3	LOC100624077	0.0354656	0.682567	0.938825	-0.14	0.114021	0.349664	-0.202798	0.0253032	0.0882556	0.00872948	0.920939	0.978498	-0.0939479	0.290309	0.571336	-0.00391846	0.964462	0.98157
A0A287BFY0	ALDOA	1.13161	0.000643496	0.0246673	1.24551	0.000227995	0.00349592	1.28976	0.000151757	0.00149726	1.78786	8.02396e-09	3.683e-06	1.20111	8.26113e-06	0.000344714	1.14107	1.73567e-05	0.00159334
A0A287BH21	LOC100156325	-0.0983395	0.484336	0.884106	-0.430623	0.00434042	0.0311967	-0.626163	0.000104901	0.00126986	-0.196948	0.0857214	0.340229	-0.263847	0.0240176	0.0975583	-0.545708	3.30761e-05	0.00189028
A0A287BH28;A0A287BHK5		-0.121402	0.536612	0.895083	-0.0287749	0.883175	0.963214	0.218061	0.270647	0.439662	-0.268392	0.347255	0.690365	-0.0626583	0.825012	0.897511	0.00810222	0.977181	0.98361
A0A287BIL8	HSPA5	-0.209487	0.0189345	0.151373	0.208503	0.0194489	0.0994055	0.0769094	0.368236	0.53604	0.105987	0.173322	0.501759	-0.115695	0.138426	0.343441	0.0620189	0.420495	0.595701
A0A287BJ64	AZGP1	0.0913913	0.202779	0.581446	0.0838927	0.241263	0.532082	-0.0450705	0.525335	0.688473	0.043388	0.608405	0.851396	0.1781	0.0423637	0.149034	0.0608007	0.473782	0.636735
A0A287BJL7	IGF2	-0.326016	0.00114745	0.026828	0.18731	0.0467224	0.193624	0.0653019	0.474219	0.640019	-0.0716356	0.457541	0.774924	-0.116103	0.232285	0.500453	0.0795428	0.409967	0.586214
A0A287BJW1	SMPDL3B	0.0921993	0.292971	0.716494	-0.0237891	0.784166	0.910899	0.13932	0.116542	0.254073	0.0572698	0.436758	0.76516	0.08854	0.232729	0.500453	0.0814951	0.271095	0.483848
A0A287BKE8	H6PD	0.0176743	0.892853	0.960971	-0.194904	0.145085	0.390254	-0.104569	0.428061	0.587785	-0.219739	0.0182625	0.113277	-0.18251	0.0465894	0.160786	-0.23914	0.0108753	0.0723442
A0A287BKJ2	FGL1	0.508601	0.000549182	0.0229658	0.073398	0.578042	0.820677	-0.120883	0.361888	0.530155	0.534946	4.41575e-05	0.000779549	0.315629	0.00811809	0.049029	0.256956	0.027852	0.124117
A0A287BKK6	KIFAP3	-0.209392	0.195473	0.572724	0.317615	0.0544833	0.214208	0.52525	0.00151594	0.00955248	0.16944	0.38497	0.713449	-0.0854263	0.63565	0.83361	0.404101	0.0307303	0.133068
A0A287BKZ4	CDH6	-0.0718412	0.499674	0.889754	-0.435748	0.000282214	0.0041877	-0.329999	0.00394806	0.0211175	-0.174764	0.162645	0.500454	-0.134167	0.280316	0.566807	-0.266892	0.03702	0.145232
A0A287BLH9		-0.131629	0.690405	0.938825	0.0690954	0.834158	0.935884	-0.512926	0.135317	0.282936	-0.0372043	0.854148	0.94699	-0.309524	0.135205	0.337809	0.245968	0.196721	0.39715
A0A287BLX2	FOLR1	0.155254	0.0662672	0.314257	-0.305245	0.00080175	0.00897163	-0.217009	0.0124435	0.0502106	-0.226278	0.0189696	0.116094	-0.266692	0.00659248	0.0458477	-0.296989	0.00286166	0.0336796
A0A287BM29	APOA4	-0.017003	0.849907	0.960583	0.0845545	0.350337	0.629745	-0.266926	0.00563954	0.0270228	-0.112937	0.304325	0.65787	-0.19156	0.0867933	0.252439	0.215585	0.055574	0.182485
A0A287BMT4		0.144315	0.817921	0.95456	0.141328	0.821622	0.928615	-0.0878547	0.888507	0.943911	-0.0271755	0.960769	0.988664	-0.387049	0.485487	0.718833	0.376586	0.497259	0.658842
A0A287BN06		-0.04892	0.626858	0.936217	-0.103164	0.30878	0.591829	-0.172592	0.0938702	0.224031	-0.0737061	0.217297	0.573214	-0.0959103	0.11169	0.296952	-0.157426	0.0117439	0.0743675
A0A287BNF7;Q69DL0	C1QA	-0.0776641	0.248532	0.651129	-0.172783	0.0139847	0.0775055	-0.0713243	0.288369	0.460329	-0.134033	0.0407365	0.205244	-0.0549849	0.386289	0.654268	-0.0562682	0.375453	0.561074
A0A287BNX9		-0.116384	0.538996	0.895083	0.120678	0.524232	0.785494	-0.199079	0.296467	0.463859	0.27294	0.268114	0.631261	0.00214923	0.992964	0.995132	-0.120111	0.622918	0.75661
A0A287BP22	FSTL1	0.155459	0.204366	0.581446	-0.11793	0.332673	0.619219	0.0116669	0.923004	0.956051	-0.137438	0.267899	0.631261	0.0766245	0.533662	0.767871	0.111259	0.367963	0.557409
A0A287BP58	LOC102166306	-0.0901713	0.700849	0.938825	0.075356	0.748044	0.898584	-0.0354819	0.879669	0.941041	0.0290043	0.883571	0.958184	0.216967	0.274153	0.556798	-0.010894	0.952143	0.977524
A0A287BPH0;P00998	SPINK1	-0.173287	0.399724	0.798441	-0.0620593	0.761676	0.898584	-0.224189	0.27799	0.447117	0.421272	0.0673202	0.291509	-0.799219	0.00117982	0.0123077	-0.279881	0.216461	0.424597
A0A287BPP9	PSMB1	0.0140448	0.908429	0.964033	-0.0794909	0.516601	0.779136	0.0469376	0.70103	0.822637	0.169436	0.299065	0.65787	0.00291255	0.985618	0.992102	-0.185048	0.257624	0.474897
[truncated: 310 more rows]

## Sheet: S3B
S3B. Paired limma analysis comparing controls and post-infection samples
[truncated: 169 more rows]

[truncated: 9 more sheets: S3C, S3D, S3E, S3F, S3G, S4A, S4B, S5, S6]
